# Supplementary material
Source: Research Square preprint supplement (doi:10.21203/rs.3.rs-8849535/v1)
Supplement: Supplementary file 1 [file 1da7735cd3575593cf279f71.xlsx]

## Sheet: Table S1
Seq Name	Length	ORF size	Coding probability
TRINITY_DN116671_c0_g1_i1	380	60	0.00801757
TRINITY_DN54195_c0_g1_i1	412	60	0.00886614
TRINITY_DN863_c1_g1_i1	267	90	0.0892073
TRINITY_DN9695_c1_g1_i1	718	96	0.000364033
TRINITY_DN48223_c0_g1_i1	363	75	0.0238845
TRINITY_DN59204_c0_g1_i1	616	69	0.000643979
TRINITY_DN101335_c0_g1_i1	421	90	0.0145838
TRINITY_DN1501_c1_g1_i9	289	24	0.0160073
TRINITY_DN110382_c0_g1_i1	323	81	0.0391442
TRINITY_DN79232_c0_g1_i1	328	75	0.0297901
TRINITY_DN19711_c0_g1_i1	321	45	0.01212
TRINITY_DN121363_c0_g1_i1	291	81	0.048771
TRINITY_DN15576_c0_g1_i4	363	63	0.0157183
TRINITY_DN99260_c0_g1_i1	806	99	0.000123889
TRINITY_DN118399_c0_g1_i1	307	66	0.0236766
TRINITY_DN653_c1_g1_i1	622	96	0.00142544
TRINITY_DN125798_c0_g1_i1	749	99	0.000323469
TRINITY_DN13422_c0_g1_i1	837	81	5.2766e-05
TRINITY_DN7494_c0_g1_i3	379	90	0.0170024
TRINITY_DN77378_c0_g1_i1	332	60	0.01741
TRINITY_DN88359_c0_g1_i1	369	33	0.00585969
TRINITY_DN4262_c3_g1_i1	520	90	0.00372251
TRINITY_DN18441_c0_g1_i4	227	51	0.0669429
TRINITY_DN24825_c1_g1_i1	245	45	0.0247358
TRINITY_DN55202_c0_g1_i1	346	39	0.00780083
TRINITY_DN35178_c0_g1_i1	649	93	0.000921126
TRINITY_DN108635_c0_g1_i1	404	72	0.00777664
TRINITY_DN46159_c0_g1_i1	261	21	0.0138427
TRINITY_DN15051_c0_g2_i3	265	60	0.0581005
TRINITY_DN17774_c4_g1_i1	292	63	0.0296153
TRINITY_DN97196_c0_g1_i1	287	27	0.0148435
TRINITY_DN19783_c2_g1_i1	211	51	0.0751685
TRINITY_DN3563_c1_g1_i4	483	48	0.00171309
TRINITY_DN113327_c0_g1_i1	705	93	0.00037369
TRINITY_DN124308_c0_g1_i1	360	75	0.0168218
TRINITY_DN51_c2_g3_i1	203	99	0.176011
TRINITY_DN4413_c1_g1_i1	303	27	0.015468
TRINITY_DN128453_c0_g1_i1	336	96	0.0263698
TRINITY_DN17437_c0_g1_i1	350	51	0.0112892
TRINITY_DN94754_c0_g1_i1	380	66	0.0136311
TRINITY_DN2647_c16_g1_i1	961	72	7.68956e-06
TRINITY_DN133145_c0_g1_i1	235	33	0.0450577
TRINITY_DN3956_c0_g1_i12	820	33	2.59939e-05
TRINITY_DN10420_c1_g1_i1	210	93	0.18697
TRINITY_DN13284_c2_g1_i1	336	75	0.0172769
TRINITY_DN50906_c0_g1_i1	619	87	0.00107457
TRINITY_DN52410_c1_g1_i1	381	66	0.0110633
TRINITY_DN7207_c3_g1_i1	210	60	0.0724976
TRINITY_DN15293_c0_g1_i1	307	72	0.0209482
TRINITY_DN70934_c0_g1_i1	321	63	0.0228019
TRINITY_DN90962_c0_g1_i1	323	72	0.0216337
TRINITY_DN14855_c1_g1_i1	235	36	0.0476101
TRINITY_DN56989_c0_g1_i1	357	48	0.013949
TRINITY_DN8295_c0_g1_i3	201	15	0.0493919
TRINITY_DN114820_c0_g1_i1	309	93	0.0508139
TRINITY_DN11502_c0_g1_i2	597	42	0.000363741
TRINITY_DN23738_c0_g2_i1	726	96	0.000364194
TRINITY_DN9006_c1_g1_i1	278	33	0.0164307
TRINITY_DN14645_c1_g1_i1	216	54	0.0706024
TRINITY_DN45798_c0_g1_i1	833	96	7.54068e-05
TRINITY_DN56779_c0_g1_i1	256	69	0.0630363
TRINITY_DN87788_c0_g1_i1	503	90	0.00379365
TRINITY_DN101985_c0_g1_i1	720	93	0.000362245
TRINITY_DN123947_c0_g1_i1	477	45	0.00250781
TRINITY_DN5358_c0_g1_i1	327	39	0.0133075
TRINITY_DN10997_c0_g1_i1	627	72	0.000776135
TRINITY_DN81499_c0_g1_i1	502	87	0.00442383
TRINITY_DN52987_c0_g1_i1	442	81	0.00727094
TRINITY_DN16692_c0_g2_i1	412	51	0.00640976
TRINITY_DN6506_c0_g1_i2	566	78	0.00181236
TRINITY_DN83996_c0_g1_i1	205	42	0.0586975
TRINITY_DN86508_c0_g1_i1	750	78	0.000147454
TRINITY_DN102074_c0_g1_i2	265	54	0.0422192
TRINITY_DN112756_c0_g1_i1	358	54	0.0120075
TRINITY_DN10282_c3_g1_i1	214	15	0.0245087
TRINITY_DN10787_c0_g1_i1	668	63	0.000260256
TRINITY_DN12291_c1_g1_i1	221	72	0.118494
TRINITY_DN109016_c0_g1_i1	331	51	0.0154047
TRINITY_DN127882_c0_g1_i1	317	60	0.0196476
TRINITY_DN3284_c3_g1_i3	275	78	0.0655307
TRINITY_DN13583_c0_g1_i2	474	6	0.00144218
TRINITY_DN75317_c0_g1_i1	392	96	0.0181439
TRINITY_DN12513_c0_g1_i2	312	60	0.0209052
TRINITY_DN95345_c0_g1_i1	321	72	0.0388265
TRINITY_DN46805_c0_g1_i1	862	87	5.44681e-05
TRINITY_DN101565_c0_g1_i1	702	93	0.000459052
TRINITY_DN100216_c0_g1_i2	716	60	9.98152e-05
TRINITY_DN66833_c0_g1_i1	429	96	0.0130548
TRINITY_DN19941_c0_g1_i1	945	84	1.25294e-05
TRINITY_DN121593_c0_g1_i1	412	72	0.0074074
TRINITY_DN10577_c0_g1_i1	351	84	0.0280608
TRINITY_DN86861_c0_g1_i1	754	96	0.000309091
TRINITY_DN120523_c0_g1_i1	279	96	0.0783188
TRINITY_DN99490_c0_g1_i1	245	78	0.0751679
TRINITY_DN97842_c0_g1_i1	250	36	0.0205287
TRINITY_DN131504_c0_g1_i1	306	84	0.0384789
TRINITY_DN88799_c0_g1_i1	339	93	0.0367994
TRINITY_DN3492_c2_g1_i1	208	24	0.0420303
TRINITY_DN2839_c6_g1_i1	405	81	0.0152636
TRINITY_DN6757_c0_g2_i1	285	78	0.0314332
TRINITY_DN60544_c0_g1_i1	374	93	0.0165167
TRINITY_DN13437_c3_g1_i1	296	72	0.0352429
TRINITY_DN73173_c0_g1_i1	426	90	0.0109315
TRINITY_DN71525_c0_g1_i1	284	81	0.0489808
TRINITY_DN84154_c0_g1_i1	444	81	0.00792895
TRINITY_DN82506_c0_g1_i1	588	57	0.000724993
TRINITY_DN95135_c0_g1_i1	614	51	0.00038552
TRINITY_DN35614_c0_g1_i1	499	66	0.003349
TRINITY_DN2509_c0_g1_i3	216	54	0.0689472
TRINITY_DN33680_c0_g1_i1	305	60	0.0212672
TRINITY_DN91553_c0_g1_i1	379	93	0.0182509
TRINITY_DN55642_c0_g1_i1	459	51	0.00297148
TRINITY_DN68271_c0_g1_i1	403	66	0.00974249
TRINITY_DN66623_c0_g1_i1	546	66	0.00134764
TRINITY_DN121383_c0_g1_i1	529	72	0.00234789
TRINITY_DN40306_c0_g1_i1	371	75	0.0249494
TRINITY_DN115411_c0_g1_i1	284	39	0.0296413
TRINITY_DN60334_c0_g1_i1	228	87	0.125248
TRINITY_DN71315_c0_g1_i1	326	66	0.0218449
TRINITY_DN80362_c0_g1_i1	430	63	0.00581415
TRINITY_DN4853_c1_g1_i1	209	72	0.0990464
TRINITY_DN55432_c0_g1_i1	347	87	0.0240196
TRINITY_DN22779_c0_g1_i1	327	54	0.0210445
TRINITY_DN108865_c0_g1_i1	429	78	0.00995475
TRINITY_DN86441_c0_g1_i1	586	75	0.000864303
TRINITY_DN64769_c0_g1_i1	285	66	0.0341327
TRINITY_DN77398_c0_g1_i1	447	45	0.00249506
TRINITY_DN39839_c0_g1_i1	272	66	0.0411369
TRINITY_DN59867_c0_g1_i1	247	75	0.0758027
TRINITY_DN102576_c0_g1_i1	345	69	0.014245
TRINITY_DN79895_c0_g1_i1	227	18	0.0279458
TRINITY_DN113557_c0_g1_i1	446	93	0.00803133
TRINITY_DN126186_c0_g1_i1	381	84	0.011433
TRINITY_DN80152_c0_g1_i1	288	99	0.0735954
TRINITY_DN33260_c0_g1_i1	328	48	0.013718
TRINITY_DN15026_c1_g1_i1	217	0	9.73795e-09
TRINITY_DN119636_c0_g1_i1	273	54	0.0350959
TRINITY_DN5430_c3_g1_i2	219	60	0.0693617
TRINITY_DN128683_c0_g1_i1	275	33	0.0316254
TRINITY_DN76118_c0_g1_i1	509	39	0.00109588
TRINITY_DN37695_c0_g1_i1	414	30	0.00299287
TRINITY_DN4433_c1_g1_i1	312	12	0.0125782
TRINITY_DN33050_c0_g1_i1	223	63	0.0560133
TRINITY_DN133375_c0_g1_i1	328	84	0.0221365
TRINITY_DN1513_c0_g1_i14	281	93	0.0722384
TRINITY_DN108445_c0_g1_i1	268	36	0.0207738
TRINITY_DN42387_c0_g1_i1	394	78	0.0162972
TRINITY_DN3791_c0_g1_i2	322	57	0.017755
TRINITY_DN122184_c0_g1_i1	450	60	0.00307434
TRINITY_DN78405_c0_g1_i1	307	57	0.0197604
TRINITY_DN121114_c0_g1_i1	577	93	0.00248203
TRINITY_DN41107_c0_g1_i1	398	75	0.0149485
TRINITY_DN116212_c0_g1_i1	295	69	0.0415284
TRINITY_DN70954_c0_g1_i1	470	96	0.00665478
TRINITY_DN19193_c0_g1_i5	828	72	5.31816e-05
TRINITY_DN3645_c3_g1_i1	484	72	0.00346464
TRINITY_DN9236_c1_g1_i1	312	90	0.0452627
TRINITY_DN56233_c0_g1_i1	311	45	0.0131945
TRINITY_DN78199_c0_g1_i1	338	69	0.0180391
TRINITY_DN106091_c0_g1_i1	691	78	0.000270832
TRINITY_DN97929_c0_g1_i1	238	66	0.077105
TRINITY_DN105021_c0_g1_i1	682	99	0.000600096
TRINITY_DN23080_c0_g1_i1	251	36	0.0446809
TRINITY_DN45042_c0_g1_i1	256	99	0.0982054
TRINITY_DN56023_c0_g1_i1	483	99	0.00496688
TRINITY_DN109456_c0_g1_i1	707	63	0.000173059
TRINITY_DN7580_c3_g1_i1	499	99	0.0069621
TRINITY_DN76051_c0_g1_i1	489	63	0.00235538
TRINITY_DN84800_c0_g1_i1	251	0	6.36883e-09
TRINITY_DN6736_c0_g1_i2	251	48	0.0354416
TRINITY_DN18468_c0_g1_i1	539	87	0.00411579
TRINITY_DN114148_c0_g1_i1	310	93	0.0491516
TRINITY_DN5234_c1_g1_i1	226	84	0.110004
TRINITY_DN96933_c0_g1_i2	324	99	0.0467775
TRINITY_DN31909_c0_g1_i1	1050	78	3.61601e-06
TRINITY_DN40956_c0_g1_i1	369	60	0.0138792
TRINITY_DN129274_c0_g1_i1	332	66	0.0251754
TRINITY_DN24794_c0_g1_i2	1021	90	6.93209e-06
TRINITY_DN71965_c0_g1_i1	337	90	0.0389218
TRINITY_DN38286_c0_g1_i1	236	69	0.0949784
TRINITY_DN82946_c0_g1_i1	311	81	0.034427
TRINITY_DN93927_c0_g1_i1	349	78	0.0262209
TRINITY_DN129064_c0_g1_i1	343	66	0.0256695
TRINITY_DN126832_c0_g1_i1	321	30	0.0085599
TRINITY_DN6843_c1_g2_i1	593	81	0.00159962
TRINITY_DN82736_c0_g1_i1	336	75	0.0251606
TRINITY_DN8731_c2_g1_i1	232	69	0.0842923
TRINITY_DN55872_c0_g1_i1	357	90	0.0410771
TRINITY_DN77834_c0_g1_i1	223	33	0.034579
TRINITY_DN97862_c0_g1_i1	209	60	0.0729826
TRINITY_DN131524_c0_g1_i1	260	51	0.0217447
TRINITY_DN20756_c1_g2_i1	232	42	0.0560392
TRINITY_DN824_c0_g2_i15	420	90	0.0099314
TRINITY_DN60564_c0_g1_i1	650	99	0.000638973
TRINITY_DN71545_c0_g1_i1	265	66	0.0397526
TRINITY_DN124978_c0_g1_i1	210	84	0.0996616
TRINITY_DN29_c3_g1_i6	439	33	0.00187256
TRINITY_DN55662_c0_g1_i1	403	69	0.00834558
TRINITY_DN90503_c0_g1_i1	256	78	0.0894135
TRINITY_DN75690_c0_g1_i1	254	54	0.0250195
TRINITY_DN85601_c0_g1_i1	232	24	0.0175203
TRINITY_DN102802_c0_g1_i1	920	78	1.29562e-05
TRINITY_DN8653_c12_g1_i1	216	81	0.108798
TRINITY_DN122830_c0_g1_i1	713	72	0.000235685
TRINITY_DN4241_c0_g1_i1	572	63	0.000907919
TRINITY_DN1915_c0_g2_i1	1318	96	1.61932e-07
TRINITY_DN2617_c0_g1_i7	214	66	0.078037
TRINITY_DN75480_c0_g1_i1	333	6	0.00842855
TRINITY_DN74410_c0_g1_i1	647	48	0.000329222
TRINITY_DN52738_c0_g1_i1	235	54	0.0456092
TRINITY_DN63719_c0_g1_i1	262	54	0.0409798
TRINITY_DN8258_c1_g1_i3	531	51	0.0011915
TRINITY_DN18748_c5_g1_i1	208	24	0.0514595
TRINITY_DN58817_c0_g1_i1	499	51	0.00199958
TRINITY_DN113577_c0_g1_i1	387	33	0.00445114
TRINITY_DN10542_c0_g3_i1	322	96	0.0335262
TRINITY_DN78845_c0_g1_i1	253	48	0.0274619
TRINITY_DN1148_c0_g1_i10	509	93	0.004867
TRINITY_DN89826_c0_g1_i1	306	42	0.0162684
TRINITY_DN2387_c0_g1_i1	892	78	2.83448e-05
TRINITY_DN21519_c0_g1_i1	288	84	0.0470823
TRINITY_DN14608_c2_g1_i1	1232	87	4.62724e-07
TRINITY_DN74200_c0_g1_i1	399	57	0.00528402
TRINITY_DN41547_c0_g1_i1	210	42	0.0380241
TRINITY_DN8466_c0_g1_i1	1175	78	7.55439e-07
TRINITY_DN76138_c0_g1_i1	397	78	0.0110566
TRINITY_DN16617_c0_g1_i1	520	60	0.00200365
TRINITY_DN36645_c0_g1_i1	463	93	0.00535308
TRINITY_DN56673_c0_g1_i1	270	75	0.0506212
TRINITY_DN67654_c0_g1_i1	333	39	0.0102757
TRINITY_DN89616_c0_g1_i1	277	81	0.0617242
TRINITY_DN87682_c0_g1_i1	304	78	0.0620787
TRINITY_DN3631_c2_g2_i1	263	72	0.0475686
TRINITY_DN132325_c0_g1_i1	318	66	0.0215542
TRINITY_DN1739_c1_g1_i1	230	54	0.0693185
TRINITY_DN41337_c0_g1_i1	328	51	0.012313
TRINITY_DN116442_c0_g1_i1	262	15	0.0146315
TRINITY_DN61365_c0_g1_i1	242	27	0.040135
TRINITY_DN9378_c8_g1_i1	222	72	0.0596091
TRINITY_DN45482_c0_g1_i1	635	84	0.000584097
TRINITY_DN1293_c0_g4_i1	267	54	0.0345164
TRINITY_DN56463_c0_g1_i1	431	81	0.0105415
TRINITY_DN69092_c0_g1_i1	804	99	0.000111681
TRINITY_DN129920_c0_g1_i1	345	78	0.0266628
TRINITY_DN18904_c0_g1_i1	378	75	0.0196161
TRINITY_DN76491_c0_g1_i1	387	60	0.00722359
TRINITY_DN110153_c0_g1_i1	454	75	0.00746701
TRINITY_DN87472_c0_g1_i1	345	48	0.0192896
TRINITY_DN38932_c0_g1_i1	464	72	0.0069852
TRINITY_DN132115_c0_g1_i1	215	57	0.0736419
TRINITY_DN10118_c0_g1_i1	638	87	0.000593319
TRINITY_DN58960_c0_g1_i1	357	99	0.0228702
TRINITY_DN52108_c0_g1_i1	279	57	0.0252963
TRINITY_DN127213_c0_g1_i1	377	84	0.0121698
TRINITY_DN123631_c0_g1_i1	347	42	0.00838478
TRINITY_DN61155_c0_g1_i1	408	42	0.00622368
TRINITY_DN551_c5_g1_i1	289	33	0.0196483
TRINITY_DN36225_c0_g1_i1	918	87	2.27238e-05
TRINITY_DN125569_c0_g1_i1	717	87	0.000303365
TRINITY_DN21662_c0_g1_i1	290	42	0.0236188
TRINITY_DN5674_c1_g1_i1	251	81	0.0855623
TRINITY_DN92164_c0_g1_i1	315	69	0.0271037
TRINITY_DN32643_c0_g1_i1	646	81	0.000610202
TRINITY_DN45272_c0_g1_i1	213	60	0.0631034
TRINITY_DN109686_c0_g1_i1	289	54	0.0284739
TRINITY_DN76281_c0_g1_i1	284	42	0.0196455
TRINITY_DN75211_c0_g1_i1	392	66	0.00876023
TRINITY_DN29679_c0_g1_i1	576	60	0.000826587
TRINITY_DN12797_c0_g2_i1	441	54	0.00351774
TRINITY_DN103397_c0_g1_i1	265	69	0.0563968
TRINITY_DN2699_c0_g1_i30	433	75	0.0076079
TRINITY_DN34081_c0_g1_i1	221	24	0.0219777
TRINITY_DN45062_c0_g1_i1	324	39	0.0118532
TRINITY_DN41480_c0_g1_i1	372	60	0.0124474
TRINITY_DN54399_c0_g1_i1	453	66	0.00501727
TRINITY_DN64020_c0_g1_i1	373	96	0.0265388
TRINITY_DN7961_c1_g1_i1	357	72	0.0174863
TRINITY_DN49497_c0_g1_i1	272	57	0.0256302
TRINITY_DN19554_c2_g1_i1	226	75	0.0796611
TRINITY_DN59408_c0_g1_i1	310	90	0.0540463
TRINITY_DN114168_c0_g1_i1	269	33	0.0177199
TRINITY_DN11517_c0_g2_i1	457	33	0.00143666
TRINITY_DN109266_c0_g1_i1	326	63	0.0204749
TRINITY_DN10122_c1_g1_i2	1098	99	4.06782e-06
TRINITY_DN40976_c0_g1_i1	252	36	0.0206283
TRINITY_DN53119_c0_g1_i1	370	90	0.0268101
TRINITY_DN82966_c0_g1_i1	570	72	0.00119474
TRINITY_DN84470_c1_g1_i1	338	45	0.0143994
TRINITY_DN37236_c0_g1_i1	381	54	0.00731124
TRINITY_DN19344_c2_g1_i1	209	81	0.111196
TRINITY_DN95109_c0_g1_i1	272	75	0.0506624
TRINITY_DN48217_c0_g1_i1	256	15	0.0181664
TRINITY_DN57264_c0_g1_i1	233	66	0.0651923
TRINITY_DN9621_c0_g1_i2	265	30	0.0219048
TRINITY_DN79226_c0_g1_i1	259	48	0.0248924
TRINITY_DN19705_c0_g1_i1	277	33	0.014635
TRINITY_DN48007_c0_g1_i1	732	75	0.000138828
TRINITY_DN1300_c1_g1_i12	319	30	0.0124692
TRINITY_DN46073_c0_g1_i1	1051	84	3.1665e-06
TRINITY_DN1708_c0_g1_i8	261	90	0.122852
TRINITY_DN68035_c0_g1_i1	595	69	0.00118601
TRINITY_DN63590_c0_g1_i2	614	90	0.00108217
TRINITY_DN88063_c0_g1_i1	779	93	0.000174701
TRINITY_DN6851_c1_g7_i1	527	72	0.00219345
TRINITY_DN29_c16_g1_i3	216	96	0.146115
TRINITY_DN20388_c1_g1_i1	212	66	0.0694727
TRINITY_DN2847_c0_g1_i7	238	60	0.069352
TRINITY_DN119320_c0_g1_i1	766	99	0.000287944
TRINITY_DN6897_c2_g1_i1	395	63	0.0127405
TRINITY_DN74640_c0_g1_i1	282	48	0.0189785
TRINITY_DN15429_c0_g1_i3	616	51	0.000378595
TRINITY_DN63949_c0_g1_i1	280	75	0.0308347
TRINITY_DN47787_c0_g1_i2	318	69	0.0311816
TRINITY_DN83977_c0_g1_i1	241	51	0.0422265
TRINITY_DN94958_c0_g1_i1	239	75	0.119223
TRINITY_DN90313_c0_g1_i1	318	30	0.00706391
TRINITY_DN21749_c0_g1_i1	459	39	0.00225062
TRINITY_DN50820_c0_g1_i1	520	69	0.00177651
TRINITY_DN21605_c1_g1_i1	1466	75	1.54926e-08
TRINITY_DN92810_c0_g1_i1	358	93	0.0290442
TRINITY_DN16703_c1_g1_i1	254	60	0.0387767
TRINITY_DN94748_c0_g1_i1	602	69	0.000960027
TRINITY_DN95047_c0_g1_i2	300	63	0.0427433
TRINITY_DN47856_c0_g1_i1	324	75	0.0226011
TRINITY_DN58837_c0_g1_i1	248	54	0.0442049
TRINITY_DN1725_c0_g2_i1	231	42	0.0371748
TRINITY_DN112527_c0_g1_i1	238	72	0.0762663
TRINITY_DN89846_c0_g1_i1	469	72	0.00600033
TRINITY_DN132555_c0_g1_i1	357	81	0.0143226
TRINITY_DN7420_c0_g3_i1	347	30	0.00476111
TRINITY_DN5407_c2_g1_i1	368	90	0.0205657
TRINITY_DN30586_c0_g1_i1	897	84	3.71442e-05
TRINITY_DN41567_c0_g1_i1	326	60	0.0164632
TRINITY_DN63529_c0_g1_i1	243	66	0.0476276
TRINITY_DN109419_c1_g1_i1	366	30	0.00482994
TRINITY_DN72576_c0_g1_i1	372	69	0.0099842
TRINITY_DN649_c4_g1_i1	239	18	0.0190111
TRINITY_DN25684_c0_g1_i1	477	63	0.00439974
TRINITY_DN36665_c0_g1_i1	217	33	0.0255037
TRINITY_DN94538_c0_g1_i1	226	69	0.0901142
TRINITY_DN56693_c0_g1_i1	614	72	0.000726155
TRINITY_DN15148_c1_g1_i2	413	81	0.0130338
TRINITY_DN121364_c0_g1_i1	368	42	0.00489895
TRINITY_DN98683_c0_g1_i1	239	60	0.0600033
TRINITY_DN103833_c0_g1_i1	334	69	0.0237277
TRINITY_DN41357_c0_g1_i1	270	69	0.0513708
TRINITY_DN114814_c0_g1_i1	361	81	0.0273337
TRINITY_DN112880_c0_g1_i1	657	36	0.000160298
TRINITY_DN61385_c0_g1_i1	277	54	0.0317548
TRINITY_DN72366_c0_g1_i1	547	72	0.00220399
TRINITY_DN118256_c1_g1_i1	216	90	0.107765
TRINITY_DN3624_c0_g1_i1	391	54	0.00726631
TRINITY_DN510_c2_g1_i1	1197	87	6.06061e-07
TRINITY_DN21892_c0_g1_i1	439	78	0.00637036
TRINITY_DN56483_c0_g1_i1	301	45	0.0178074
TRINITY_DN4411_c2_g1_i2	659	99	0.000715859
TRINITY_DN91324_c0_g1_i1	227	33	0.0261615
TRINITY_DN16990_c0_g1_i1	214	66	0.104885
TRINITY_DN27971_c0_g1_i1	584	96	0.00188942
TRINITY_DN1292_c5_g2_i1	513	45	0.00136449
TRINITY_DN97403_c0_g1_i1	346	66	0.0116017
TRINITY_DN112670_c0_g1_i1	222	78	0.144132
TRINITY_DN50194_c0_g1_i1	473	90	0.00745425
TRINITY_DN2_c6_g1_i1	243	33	0.0241614
TRINITY_DN59848_c0_g1_i1	289	66	0.0232974
TRINITY_DN132988_c0_g1_i1	349	99	0.051353
TRINITY_DN7984_c0_g2_i9	247	18	0.0168299
TRINITY_DN80133_c0_g1_i1	271	51	0.0370332
TRINITY_DN91114_c0_g1_i1	383	75	0.01718
TRINITY_DN52691_c0_g1_i1	269	69	0.0477535
TRINITY_DN55203_c0_g1_i1	841	99	8.93539e-05
TRINITY_DN16780_c0_g1_i1	434	90	0.00890966
TRINITY_DN9497_c0_g1_i1	413	96	0.015836
TRINITY_DN53559_c0_g1_i1	206	15	0.0255347
TRINITY_DN39320_c0_g1_i1	232	63	0.0712211
TRINITY_DN101769_c0_g1_i1	229	51	0.060958
TRINITY_DN114398_c0_g1_i1	311	66	0.0314244
TRINITY_DN121797_c0_g1_i1	355	51	0.00862689
TRINITY_DN3894_c0_g2_i5	389	96	0.0205815
TRINITY_DN20794_c0_g2_i1	504	60	0.00259844
TRINITY_DN4414_c1_g1_i1	202	99	0.264193
TRINITY_DN108426_c0_g1_i1	398	54	0.00676073
TRINITY_DN51411_c0_g1_i1	279	57	0.0204111
TRINITY_DN119407_c0_g1_i1	465	81	0.00387531
TRINITY_DN15500_c0_g1_i1	245	72	0.0628261
TRINITY_DN42368_c0_g1_i1	203	84	0.108723
TRINITY_DN5706_c0_g1_i2	390	63	0.00860337
TRINITY_DN82420_c0_g1_i1	447	81	0.00630249
TRINITY_DN6911_c1_g1_i1	487	63	0.00310896
TRINITY_DN57882_c0_g2_i1	298	90	0.0498955
TRINITY_DN73377_c0_g1_i1	266	90	0.0728737
TRINITY_DN84358_c0_g1_i1	450	57	0.00317601
TRINITY_DN8849_c1_g1_i1	255	99	0.152074
TRINITY_DN48447_c0_g1_i1	347	87	0.0291836
TRINITY_DN57494_c0_g1_i1	443	18	0.00162043
TRINITY_DN68475_c0_g1_i1	348	63	0.0236271
TRINITY_DN79456_c0_g1_i1	230	39	0.0328419
TRINITY_DN120517_c0_g1_i1	399	99	0.019159
TRINITY_DN3103_c2_g2_i2	464	72	0.00469532
TRINITY_DN40220_c0_g1_i1	433	99	0.0109652
TRINITY_DN108216_c0_g1_i1	260	48	0.0465223
TRINITY_DN42158_c0_g1_i1	286	99	0.105831
TRINITY_DN53139_c0_g1_i1	284	87	0.0447745
TRINITY_DN37256_c0_g1_i1	604	63	0.000729462
TRINITY_DN1300_c15_g1_i1	250	72	0.073097
TRINITY_DN93195_c0_g1_i1	413	54	0.00858747
TRINITY_DN119760_c0_g1_i1	398	42	0.00451107
TRINITY_DN57284_c0_g1_i1	304	87	0.0350809
TRINITY_DN68265_c0_g1_i1	399	78	0.0144061
TRINITY_DN19725_c0_g1_i1	417	87	0.00926933
TRINITY_DN88293_c0_g1_i1	582	60	0.000695849
TRINITY_DN120307_c0_g1_i1	399	54	0.00476338
TRINITY_DN39753_c0_g1_i1	415	15	0.00227973
TRINITY_DN59781_c0_g1_i1	255	96	0.0945313
TRINITY_DN115405_c0_g1_i1	246	45	0.0422698
TRINITY_DN11890_c0_g2_i1	748	84	0.000153668
TRINITY_DN124452_c0_g1_i1	240	54	0.0518136
TRINITY_DN26065_c0_g1_i1	505	72	0.00422048
TRINITY_DN22483_c0_g1_i1	398	66	0.00772742
TRINITY_DN6495_c1_g1_i1	204	57	0.0852006
TRINITY_DN23739_c0_g2_i1	359	45	0.0075694
TRINITY_DN33464_c0_g1_i1	332	60	0.0122668
TRINITY_DN57074_c0_g1_i1	358	84	0.023181
TRINITY_DN6983_c3_g1_i1	232	81	0.0943529
TRINITY_DN17581_c0_g1_i1	557	63	0.00082729
TRINITY_DN88083_c0_g1_i1	239	81	0.0714494
TRINITY_DN104214_c0_g1_i1	563	90	0.00163451
TRINITY_DN113261_c0_g1_i1	597	96	0.00201686
TRINITY_DN115199_c0_g1_i1	276	84	0.069724
TRINITY_DN525_c0_g1_i15	396	33	0.00565102
TRINITY_DN52988_c0_g1_i1	217	75	0.0837871
TRINITY_DN16301_c0_g1_i1	422	45	0.00422333
TRINITY_DN94978_c0_g1_i1	242	72	0.0484139
TRINITY_DN47310_c0_g1_i1	516	57	0.0021722
TRINITY_DN3505_c0_g3_i1	746	84	0.00015459
TRINITY_DN101000_c0_g1_i1	256	99	0.0872395
TRINITY_DN5005_c1_g1_i1	232	27	0.0248894
TRINITY_DN50840_c0_g1_i1	384	54	0.00582287
TRINITY_DN109017_c0_g1_i1	409	96	0.0134671
TRINITY_DN41797_c0_g1_i1	270	99	0.0861579
TRINITY_DN16723_c1_g1_i1	472	87	0.00981399
TRINITY_DN82438_c0_g1_i2	632	99	0.00109367
TRINITY_DN49038_c0_g1_i1	278	63	0.0497457
TRINITY_DN58085_c0_g1_i1	340	99	0.0335087
TRINITY_DN3299_c0_g3_i1	270	24	0.0173093
TRINITY_DN2871_c0_g1_i22	851	93	5.7534e-05
TRINITY_DN130927_c0_g1_i1	384	96	0.028122
TRINITY_DN116206_c0_g1_i1	300	12	0.0140005
TRINITY_DN25218_c0_g1_i1	292	12	0.00810438
TRINITY_DN13862_c2_g1_i2	483	51	0.00159542
TRINITY_DN16373_c2_g1_i1	674	84	0.000448855
TRINITY_DN66624_c0_g1_i1	484	93	0.00481018
TRINITY_DN97633_c0_g1_i1	281	96	0.0673823
TRINITY_DN105015_c0_g1_i1	216	48	0.0505924
TRINITY_DN5957_c1_g1_i9	383	24	0.00469814
TRINITY_DN71316_c0_g1_i1	308	93	0.0535048
TRINITY_DN20563_c0_g1_i2	293	57	0.0279079
TRINITY_DN32893_c0_g1_i1	771	78	0.000126513
TRINITY_DN109160_c0_g1_i1	202	60	0.0893022
TRINITY_DN2404_c2_g2_i3	249	96	0.0862123
TRINITY_DN6440_c0_g1_i2	231	0	8.17589e-09
TRINITY_DN75461_c0_g1_i1	466	66	0.00444871
TRINITY_DN86442_c0_g1_i1	208	33	0.0308151
TRINITY_DN37902_c0_g1_i1	475	87	0.00443764
TRINITY_DN82860_c0_g1_i1	975	96	1.4375e-05
TRINITY_DN57930_c0_g1_i1	337	9	0.00667479
TRINITY_DN101999_c0_g1_i1	557	81	0.00231594
TRINITY_DN4306_c0_g3_i1	247	54	0.0500955
TRINITY_DN91134_c0_g1_i1	292	63	0.0245745
TRINITY_DN31613_c0_g1_i1	644	72	0.000541966
TRINITY_DN120957_c0_g1_i1	510	66	0.00231214
TRINITY_DN131938_c0_g1_i1	244	81	0.120365
TRINITY_DN6159_c2_g1_i2	325	72	0.0304937
TRINITY_DN73603_c0_g1_i1	398	48	0.00713721
TRINITY_DN93631_c0_g1_i1	355	96	0.0250285
TRINITY_DN57720_c0_g1_i1	256	69	0.0528249
TRINITY_DN28505_c1_g1_i1	250	54	0.049821
TRINITY_DN84588_c0_g1_i1	216	21	0.0249573
TRINITY_DN37696_c0_g1_i1	248	81	0.0779697
TRINITY_DN23718_c0_g1_i2	242	24	0.02356
TRINITY_DN59658_c0_g1_i1	243	69	0.0513512
TRINITY_DN79686_c0_g1_i1	286	81	0.0708088
TRINITY_DN20422_c0_g1_i1	245	27	0.0190735
TRINITY_DN133376_c0_g1_i1	356	69	0.0183263
TRINITY_DN2285_c4_g1_i1	315	0	2.86378e-09
TRINITY_DN131728_c0_g1_i1	321	81	0.0310552
TRINITY_DN40450_c0_g1_i1	344	72	0.0228541
TRINITY_DN51431_c0_g1_i1	675	39	0.000148495
TRINITY_DN62412_c0_g1_i1	305	81	0.0417538
TRINITY_DN104864_c0_g1_i1	381	69	0.0100333
TRINITY_DN69853_c0_g1_i2	431	69	0.00782817
TRINITY_DN115845_c0_g1_i1	209	66	0.0844159
TRINITY_DN8220_c5_g1_i1	264	96	0.0910091
TRINITY_DN73397_c0_g1_i1	313	15	0.0077271
TRINITY_DN7136_c1_g2_i2	1021	78	3.50192e-06
TRINITY_DN95359_c0_g1_i1	339	78	0.0347743
TRINITY_DN44885_c0_g1_i1	762	75	0.000179193
TRINITY_DN55866_c0_g1_i1	493	87	0.00461306
TRINITY_DN100509_c0_g1_i1	448	75	0.00502757
TRINITY_DN19955_c0_g1_i1	424	87	0.00781957
TRINITY_DN75894_c0_g1_i1	340	96	0.0484172
TRINITY_DN122185_c0_g1_i1	695	72	0.000295206
TRINITY_DN78406_c0_g1_i1	274	42	0.0198619
TRINITY_DN131518_c0_g1_i1	265	51	0.025139
TRINITY_DN38913_c0_g1_i1	316	48	0.0148255
TRINITY_DN104654_c0_g1_i1	407	42	0.00460315
TRINITY_DN69922_c0_g1_i1	305	90	0.0733763
TRINITY_DN124682_c0_g1_i1	366	87	0.0187803
TRINITY_DN15099_c3_g1_i1	809	72	7.26787e-05
TRINITY_DN4445_c0_g1_i1	285	93	0.0423222
TRINITY_DN8325_c0_g1_i5	542	90	0.00311695
TRINITY_DN72117_c0_g1_i1	230	51	0.0635411
TRINITY_DN33694_c0_g1_i1	263	51	0.0240669
TRINITY_DN32624_c0_g1_i1	467	87	0.00582386
TRINITY_DN43605_c0_g1_i1	256	87	0.0661582
TRINITY_DN67215_c0_g1_i1	653	78	0.000418799
TRINITY_DN39773_c0_g1_i1	206	87	0.216133
TRINITY_DN74614_c0_g1_i1	659	96	0.000661025
TRINITY_DN87243_c0_g1_i1	349	63	0.0156786
TRINITY_DN104444_c0_g1_i1	459	84	0.00733034
TRINITY_DN1427_c5_g1_i1	335	90	0.049072
TRINITY_DN113491_c0_g1_i1	309	60	0.0266638
TRINITY_DN1915_c7_g1_i1	229	57	0.0456241
TRINITY_DN123402_c0_g1_i1	270	24	0.0151234
TRINITY_DN28_c0_g1_i6	381	30	0.00583733
TRINITY_DN355_c9_g2_i1	393	42	0.00786994
TRINITY_DN33484_c0_g1_i1	266	66	0.0522393
TRINITY_DN108879_c0_g1_i1	350	99	0.0248218
TRINITY_DN118500_c0_g1_i1	614	69	0.000561776
TRINITY_DN56024_c0_g1_i1	403	54	0.00601952
TRINITY_DN67005_c0_g1_i1	726	81	0.000216182
TRINITY_DN107809_c0_g1_i1	228	81	0.132476
TRINITY_DN2371_c3_g1_i3	290	87	0.0393514
TRINITY_DN63423_c0_g1_i1	1141	93	1.77912e-06
TRINITY_DN74404_c0_g1_i1	500	69	0.00303228
TRINITY_DN87033_c0_g1_i1	692	96	0.000554049
TRINITY_DN98014_c0_g1_i1	202	99	0.159916
TRINITY_DN2876_c0_g1_i3	227	66	0.0709729
TRINITY_DN96080_c0_g1_i1	274	93	0.094025
TRINITY_DN85389_c0_g1_i1	307	93	0.0374942
TRINITY_DN69502_c0_g1_i1	252	36	0.0251684
TRINITY_DN112211_c0_g1_i1	320	84	0.0265421
TRINITY_DN89530_c0_g1_i1	367	93	0.0256065
TRINITY_DN233_c2_g2_i1	211	36	0.0300817
TRINITY_DN16321_c0_g1_i1	485	75	0.0051502
TRINITY_DN27302_c0_g1_i1	361	96	0.0298455
TRINITY_DN127627_c0_g1_i1	306	75	0.0349405
TRINITY_DN72260_c0_g1_i1	225	72	0.093356
TRINITY_DN18115_c1_g1_i1	240	54	0.0447585
TRINITY_DN85179_c0_g1_i1	330	15	0.0108059
TRINITY_DN25658_c0_g1_i1	245	33	0.0348724
TRINITY_DN10664_c1_g1_i1	523	72	0.00243205
TRINITY_DN30060_c0_g1_i1	306	42	0.0106677
TRINITY_DN105455_c0_g1_i1	317	84	0.0573042
TRINITY_DN129065_c0_g1_i1	469	78	0.00375869
TRINITY_DN127417_c0_g1_i1	353	78	0.0208646
TRINITY_DN72050_c0_g1_i1	375	63	0.0143689
TRINITY_DN899_c4_g1_i1	209	90	0.123909
TRINITY_DN14467_c0_g1_i1	734	6	5.61623e-05
TRINITY_DN27096_c0_g1_i1	393	84	0.0132353
TRINITY_DN56457_c0_g1_i1	207	0	1.10333e-08
TRINITY_DN69086_c0_g1_i1	352	60	0.00962669
TRINITY_DN76485_c0_g1_i1	234	9	0.0186937
TRINITY_DN29593_c0_g1_i1	446	69	0.0049116
TRINITY_DN121128_c0_g1_i1	842	78	7.05336e-05
TRINITY_DN2426_c0_g1_i13	878	78	3.90173e-05
TRINITY_DN1865_c2_g1_i1	245	81	0.0694274
TRINITY_DN116226_c0_g1_i1	215	30	0.0327362
TRINITY_DN3490_c0_g2_i1	251	45	0.0397538
TRINITY_DN114292_c0_g1_i1	230	48	0.0503715
TRINITY_DN125273_c0_g1_i1	238	0	7.4915e-09
TRINITY_DN109390_c0_g1_i1	429	48	0.00494553
TRINITY_DN119301_c0_g1_i1	399	60	0.00724143
TRINITY_DN1023_c1_g1_i1	674	90	0.000600357
TRINITY_DN12813_c0_g2_i8	432	90	0.0107907
TRINITY_DN125063_c0_g1_i1	253	99	0.127691
TRINITY_DN31843_c0_g1_i1	493	90	0.00461222
TRINITY_DN11587_c8_g1_i1	438	84	0.0115546
TRINITY_DN108110_c0_g1_i1	226	87	0.0983651
TRINITY_DN22656_c1_g1_i1	250	78	0.0894922
TRINITY_DN80529_c1_g1_i1	256	75	0.0530668
TRINITY_DN18192_c0_g1_i1	279	72	0.0463581
TRINITY_DN82880_c0_g1_i1	780	75	0.000100965
TRINITY_DN28103_c0_g1_i1	594	78	0.0012161
TRINITY_DN95799_c0_g1_i1	385	51	0.00974515
TRINITY_DN48131_c0_g1_i1	218	0	9.61709e-09
TRINITY_DN7816_c2_g1_i2	269	69	0.0572816
TRINITY_DN79140_c0_g1_i1	277	36	0.023315
TRINITY_DN2000_c0_g2_i1	208	33	0.0364538
TRINITY_DN9825_c0_g1_i2	248	51	0.0404982
TRINITY_DN846_c4_g1_i4	313	24	0.00796779
TRINITY_DN20558_c0_g2_i1	359	54	0.00924236
TRINITY_DN131958_c0_g1_i1	319	84	0.0537771
TRINITY_DN810_c2_g2_i2	301	21	0.0082593
TRINITY_DN60998_c0_g1_i1	390	63	0.0107051
TRINITY_DN94519_c0_g1_i1	433	81	0.00878967
TRINITY_DN9615_c0_g1_i2	284	30	0.015871
TRINITY_DN131748_c0_g1_i1	236	57	0.044349
TRINITY_DN202_c17_g1_i1	306	42	0.0171274
TRINITY_DN94309_c0_g1_i1	758	66	9.32688e-05
TRINITY_DN90727_c0_g1_i1	209	66	0.0994837
TRINITY_DN43835_c0_g1_i1	250	81	0.072754
TRINITY_DN18521_c0_g2_i1	368	81	0.0151702
TRINITY_DN63863_c0_g1_i1	243	21	0.0204514
TRINITY_DN74844_c0_g1_i1	306	0	3.20445e-09
TRINITY_DN85825_c0_g1_i1	293	54	0.0259744
TRINITY_DN38933_c0_g1_i1	472	63	0.00237626
TRINITY_DN96806_c0_g1_i1	333	87	0.0395928
TRINITY_DN840_c58_g1_i1	222	78	0.12198
TRINITY_DN94872_c0_g1_i1	211	30	0.0452988
TRINITY_DN58961_c0_g1_i1	297	63	0.0298362
TRINITY_DN103604_c0_g1_i1	456	57	0.0041869
TRINITY_DN134613_c0_g1_i1	308	87	0.0278948
TRINITY_DN72137_c0_g1_i1	215	96	0.167811
TRINITY_DN21384_c0_g1_i2	325	69	0.0221333
TRINITY_DN90517_c0_g1_i1	318	48	0.0144525
TRINITY_DN54606_c0_g1_i1	393	30	0.00314192
TRINITY_DN18311_c0_g2_i1	386	90	0.0239254
TRINITY_DN129711_c0_g1_i1	201	15	0.0317307
TRINITY_DN74634_c0_g1_i1	412	57	0.00541167
TRINITY_DN38723_c0_g1_i1	312	84	0.0398381
TRINITY_DN83681_c0_g1_i1	423	18	0.00166965
TRINITY_DN89760_c0_g1_i1	231	75	0.0747117
TRINITY_DN123422_c0_g1_i1	442	90	0.0111229
TRINITY_DN19847_c0_g1_i2	457	84	0.00648632
TRINITY_DN130821_c0_g1_i1	330	93	0.0371971
TRINITY_DN32434_c0_g1_i1	309	66	0.0260595
TRINITY_DN43415_c0_g1_i1	1747	87	7.09488e-10
TRINITY_DN18101_c0_g2_i1	735	90	0.000218026
TRINITY_DN107829_c0_g1_i1	332	45	0.00865351
TRINITY_DN52462_c0_g1_i1	489	81	0.0036147
TRINITY_DN16551_c0_g1_i1	368	87	0.0198846
TRINITY_DN17671_c1_g4_i1	1283	78	2.32752e-07
TRINITY_DN58541_c0_g1_i1	550	75	0.00173777
TRINITY_DN49498_c0_g1_i1	706	96	0.000311934
TRINITY_DN112231_c0_g1_i1	390	60	0.00870247
TRINITY_DN67878_c0_g1_i1	506	66	0.00215891
TRINITY_DN10262_c0_g1_i1	458	30	0.0017476
TRINITY_DN614_c0_g2_i1	712	51	0.00015317
TRINITY_DN63233_c0_g1_i1	264	72	0.0535217
TRINITY_DN105685_c0_g1_i1	220	24	0.0391739
TRINITY_DN116666_c0_g1_i1	225	33	0.0222992
TRINITY_DN3467_c2_g1_i1	250	57	0.0517925
TRINITY_DN43065_c1_g1_i1	363	99	0.0279354
TRINITY_DN23740_c0_g1_i1	653	96	0.000879608
TRINITY_DN61589_c0_g1_i1	421	66	0.00590707
TRINITY_DN858_c1_g1_i1	236	54	0.0442959
TRINITY_DN92598_c0_g1_i1	462	87	0.00773802
TRINITY_DN2403_c2_g1_i4	336	96	0.0398863
TRINITY_DN19201_c3_g1_i1	208	57	0.0757235
TRINITY_DN110377_c0_g1_i1	321	39	0.0175065
TRINITY_DN132339_c0_g1_i1	467	45	0.00242771
TRINITY_DN39734_c0_g1_i1	281	33	0.0174047
TRINITY_DN97607_c0_g1_i1	383	78	0.0108292
TRINITY_DN105475_c0_g1_i1	430	75	0.00746535
TRINITY_DN127437_c0_g1_i1	265	69	0.0408557
TRINITY_DN50398_c0_g1_i1	248	57	0.0447083
TRINITY_DN13138_c0_g1_i2	300	66	0.029534
TRINITY_DN648_c1_g1_i1	246	78	0.0841927
TRINITY_DN13417_c0_g1_i1	545	69	0.00137579
TRINITY_DN107972_c0_g1_i1	259	63	0.0361109
TRINITY_DN45496_c0_g1_i1	725	78	0.000147472
TRINITY_DN55407_c0_g1_i1	434	57	0.00725757
TRINITY_DN79017_c0_g1_i1	260	90	0.0639747
TRINITY_DN75435_c0_g1_i1	384	69	0.0124346
TRINITY_DN88064_c0_g1_i1	614	87	0.00110188
TRINITY_DN28543_c0_g1_i1	542	84	0.00244199
TRINITY_DN130195_c0_g1_i1	385	36	0.00588312
TRINITY_DN105265_c0_g1_i1	455	54	0.00410791
TRINITY_DN48571_c0_g1_i1	1493	81	1.3906e-08
TRINITY_DN101683_c0_g1_i1	320	0	2.69042e-09
TRINITY_DN4266_c0_g1_i13	426	30	0.00244713
TRINITY_DN125293_c0_g1_i1	241	54	0.0559067
TRINITY_DN124223_c0_g1_i1	338	42	0.0103024
TRINITY_DN13207_c0_g1_i1	479	87	0.00524331
TRINITY_DN4960_c2_g1_i1	459	33	0.00141073
TRINITY_DN22254_c0_g1_i1	410	87	0.0190725
TRINITY_DN6122_c2_g1_i1	312	60	0.0181985
TRINITY_DN22886_c1_g1_i1	250	72	0.0917327
TRINITY_DN75225_c0_g1_i1	518	93	0.00534438
TRINITY_DN37380_c0_g1_i1	537	72	0.00200725
TRINITY_DN46713_c0_g1_i1	399	75	0.0161861
TRINITY_DN20895_c0_g1_i3	578	75	0.00113057
TRINITY_DN165_c3_g1_i5	240	69	0.0428615
TRINITY_DN79370_c0_g1_i1	513	99	0.00553264
TRINITY_DN325_c0_g1_i67	330	84	0.0239621
TRINITY_DN4168_c0_g2_i1	302	45	0.0107341
TRINITY_DN4408_c1_g1_i1	355	72	0.0186761
TRINITY_DN44006_c0_g1_i1	347	39	0.0122664
TRINITY_DN31091_c0_g1_i1	341	39	0.0141184
TRINITY_DN53053_c0_g1_i1	946	96	1.89346e-05
TRINITY_DN126510_c0_g1_i1	411	63	0.00901036
TRINITY_DN12482_c3_g1_i2	217	75	0.123696
TRINITY_DN17142_c0_g1_i1	268	39	0.0331706
TRINITY_DN117467_c0_g1_i1	580	96	0.0021138
TRINITY_DN39104_c0_g1_i1	514	54	0.00269283
TRINITY_DN128448_c0_g1_i1	453	60	0.00312538
TRINITY_DN14816_c0_g2_i1	395	15	0.00282282
TRINITY_DN24541_c0_g1_i1	308	93	0.0371289
TRINITY_DN37170_c0_g1_i1	328	81	0.0235218
TRINITY_DN95043_c0_g1_i1	223	78	0.082371
TRINITY_DN35522_c0_g1_i1	434	78	0.00833846
TRINITY_DN48151_c0_g1_i1	381	96	0.0164388
TRINITY_DN59132_c0_g1_i1	359	54	0.00807211
TRINITY_DN79160_c0_g1_i1	237	87	0.0976492
TRINITY_DN120221_c0_g1_i1	618	36	0.000305999
TRINITY_DN739_c0_g1_i4	511	84	0.0040091
TRINITY_DN81620_c0_g1_i1	503	45	0.00177853
TRINITY_DN46297_c0_g1_i1	843	96	9.34744e-05
TRINITY_DN57278_c0_g1_i1	288	12	0.0163193
TRINITY_DN9635_c0_g1_i2	272	63	0.0308433
TRINITY_DN1292_c58_g1_i2	274	72	0.0431119
TRINITY_DN106066_c0_g1_i1	248	18	0.0158677
TRINITY_DN126094_c0_g1_i1	485	66	0.00378134
TRINITY_DN1988_c0_g1_i12	455	45	0.00286573
TRINITY_DN12702_c1_g1_i1	231	33	0.0184825
TRINITY_DN14008_c0_g1_i1	240	33	0.0251363
TRINITY_DN92395_c0_g1_i1	292	39	0.0185671
TRINITY_DN32874_c0_g1_i1	413	96	0.0119058
TRINITY_DN928_c6_g1_i1	457	90	0.00710097
TRINITY_DN15642_c0_g1_i2	626	99	0.000940794
TRINITY_DN87007_c0_g1_i1	567	96	0.0025003
TRINITY_DN94892_c0_g1_i1	486	81	0.00336427
TRINITY_DN2286_c0_g1_i5	750	72	0.000143572
TRINITY_DN58981_c0_g1_i1	335	48	0.0219508
TRINITY_DN10996_c0_g3_i1	1088	87	2.58148e-06
TRINITY_DN99901_c0_g1_i1	628	93	0.000676929
TRINITY_DN12496_c1_g1_i1	333	78	0.0192416
TRINITY_DN94682_c0_g1_i1	343	48	0.0102721
TRINITY_DN13788_c0_g1_i2	392	63	0.00664664
TRINITY_DN93612_c0_g1_i1	475	72	0.00521331
TRINITY_DN110813_c0_g1_i1	313	96	0.046694
TRINITY_DN88710_c0_g1_i1	384	78	0.0166716
TRINITY_DN130841_c0_g1_i1	251	48	0.0420501
TRINITY_DN121798_c0_g1_i1	550	66	0.001179
TRINITY_DN7350_c0_g1_i1	247	66	0.0642518
TRINITY_DN127877_c0_g1_i1	228	87	0.137368
TRINITY_DN83491_c0_g1_i1	294	99	0.0552671
TRINITY_DN129039_c0_g1_i1	258	33	0.0250601
TRINITY_DN82421_c0_g1_i1	352	72	0.0249655
TRINITY_DN22900_c0_g1_i1	422	72	0.00653914
TRINITY_DN36889_c0_g1_i1	278	66	0.0530958
TRINITY_DN93402_c0_g1_i1	404	90	0.0155249
TRINITY_DN35819_c0_g1_i1	278	36	0.0332642
TRINITY_DN55847_c0_g1_i1	418	75	0.00774485
TRINITY_DN132569_c0_g1_i1	438	96	0.0135634
TRINITY_DN12076_c1_g1_i1	561	75	0.00134515
TRINITY_DN97837_c0_g1_i1	249	54	0.0332383
TRINITY_DN8084_c1_g1_i4	323	66	0.0217704
TRINITY_DN7664_c0_g1_i18	272	60	0.0264401
TRINITY_DN35609_c0_g1_i1	326	81	0.0316364
TRINITY_DN19342_c0_g2_i1	227	81	0.0874024
TRINITY_DN75665_c0_g1_i1	334	33	0.00826409
TRINITY_DN39754_c0_g1_i1	474	96	0.00892306
TRINITY_DN97627_c0_g1_i1	318	75	0.0325044
TRINITY_DN6467_c16_g1_i1	271	42	0.0223386
TRINITY_DN112894_c0_g1_i1	417	90	0.0140197
TRINITY_DN71020_c0_g1_i1	465	90	0.00530533
TRINITY_DN13349_c7_g1_i1	386	69	0.010288
TRINITY_DN111824_c0_g1_i1	332	45	0.00829005
TRINITY_DN13053_c0_g2_i1	777	87	0.000158137
TRINITY_DN2822_c8_g1_i1	268	24	0.0218385
TRINITY_DN60329_c0_g1_i1	404	30	0.00358722
TRINITY_DN4216_c0_g1_i1	1018	90	5.41957e-06
TRINITY_DN4848_c1_g1_i1	201	42	0.0662851
TRINITY_DN33465_c0_g1_i1	275	84	0.0459252
TRINITY_DN19132_c0_g2_i1	257	84	0.0643371
TRINITY_DN6984_c3_g1_i1	316	57	0.0283976
TRINITY_DN17367_c3_g1_i1	320	51	0.0222063
TRINITY_DN62826_c0_g1_i1	685	51	0.00022648
TRINITY_DN75455_c0_g1_i1	406	60	0.00700191
TRINITY_DN86436_c0_g1_i1	261	87	0.0963633
TRINITY_DN95483_c0_g1_i1	300	60	0.0319142
TRINITY_DN35962_c0_g1_i1	260	90	0.0938783
TRINITY_DN59572_c0_g1_i1	297	81	0.0704945
TRINITY_DN100633_c0_g1_i1	416	57	0.00611588
TRINITY_DN77952_c0_g1_i1	317	33	0.0119704
TRINITY_DN18730_c0_g1_i2	358	78	0.0147905
TRINITY_DN60119_c0_g1_i1	592	96	0.00151015
TRINITY_DN120661_c0_g1_i1	310	48	0.0268031
TRINITY_DN122599_c0_g1_i1	318	96	0.0405822
TRINITY_DN108360_c0_g1_i1	878	99	4.07898e-05
TRINITY_DN106712_c0_g1_i1	283	21	0.014134
TRINITY_DN29_c9_g1_i10	234	60	0.0597523
TRINITY_DN40654_c0_g1_i1	301	51	0.0210374
TRINITY_DN17157_c3_g1_i1	201	99	0.219216
TRINITY_DN17372_c0_g1_i1	376	36	0.00457147
TRINITY_DN75245_c0_g1_i1	250	12	0.0186681
TRINITY_DN117697_c0_g1_i1	391	90	0.0182018
TRINITY_DN13790_c0_g1_i1	228	30	0.0228998
TRINITY_DN84292_c0_g1_i1	231	42	0.0514123
TRINITY_DN8783_c1_g1_i1	278	78	0.0585886
TRINITY_DN2647_c0_g1_i3	232	9	0.0223652
TRINITY_DN79390_c0_g1_i1	271	78	0.0498586
TRINITY_DN68699_c0_g1_i1	470	54	0.00342999
TRINITY_DN7769_c0_g2_i4	543	99	0.00426217
TRINITY_DN11083_c0_g1_i1	1189	84	5.9978e-07
TRINITY_DN122389_c0_g1_i1	338	54	0.0140328
TRINITY_DN1145_c1_g1_i2	1152	66	7.62432e-07
TRINITY_DN52003_c0_g1_i1	306	39	0.0144202
TRINITY_DN84082_c0_g1_i1	648	30	0.000212134
TRINITY_DN1156_c23_g1_i1	300	96	0.0559332
TRINITY_DN83012_c0_g1_i1	277	0	4.60301e-09
TRINITY_DN2723_c0_g1_i41	281	99	0.109088
TRINITY_DN78110_c0_g1_i1	392	33	0.00384326
TRINITY_DN120241_c0_g1_i1	229	63	0.073461
TRINITY_DN3788_c2_g3_i1	497	48	0.00154215
TRINITY_DN106296_c0_g1_i1	382	96	0.0225311
TRINITY_DN2426_c0_g1_i18	647	63	0.000394397
TRINITY_DN116207_c0_g1_i1	258	87	0.0655791
TRINITY_DN1292_c4_g3_i3	350	39	0.0103545
TRINITY_DN18771_c0_g2_i1	847	93	0.000104605
TRINITY_DN45247_c0_g1_i1	388	93	0.0222602
TRINITY_DN118704_c0_g1_i1	267	84	0.0583823
TRINITY_DN56228_c0_g1_i1	552	96	0.00292949
TRINITY_DN76256_c0_g1_i1	338	30	0.00693693
TRINITY_DN5302_c0_g1_i3	1323	96	2.31627e-07
TRINITY_DN1004_c1_g1_i1	418	87	0.0164734
TRINITY_DN18871_c2_g1_i1	212	90	0.16146
TRINITY_DN23075_c0_g1_i1	340	72	0.0238755
TRINITY_DN34056_c0_g1_i1	679	75	0.000372789
TRINITY_DN32408_c0_g1_i1	238	42	0.0289136
TRINITY_DN107513_c0_g1_i1	286	75	0.0449512
TRINITY_DN45037_c0_g1_i1	707	87	0.000369428
TRINITY_DN54084_c0_g1_i1	239	72	0.050746
TRINITY_DN65065_c0_g1_i1	486	69	0.00289807
TRINITY_DN16525_c0_g1_i1	257	72	0.0490338
TRINITY_DN29154_c0_g1_i1	360	81	0.01816
TRINITY_DN101224_c0_g1_i1	778	90	0.000179386
TRINITY_DN1292_c26_g1_i2	223	81	0.0795323
TRINITY_DN10236_c0_g1_i1	298	48	0.0175462
TRINITY_DN85947_c0_g1_i2	316	72	0.0226956
TRINITY_DN116350_c0_g1_i1	279	60	0.0372782
TRINITY_DN127331_c0_g1_i1	234	57	0.0389918
TRINITY_DN16315_c0_g1_i1	219	27	0.0307391
TRINITY_DN118288_c0_g1_i1	507	96	0.00677658
TRINITY_DN3097_c10_g1_i1	389	48	0.00542643
TRINITY_DN101014_c0_g1_i1	451	99	0.0107891
TRINITY_DN1559_c2_g1_i11	307	93	0.0667704
TRINITY_DN1076_c3_g1_i1	249	78	0.106882
TRINITY_DN121042_c0_g1_i1	275	39	0.0152192
TRINITY_DN10026_c0_g1_i1	1621	93	2.81613e-09
TRINITY_DN21399_c0_g2_i1	259	54	0.0508281
TRINITY_DN1437_c1_g1_i1	306	60	0.0233885
TRINITY_DN118078_c0_g1_i1	352	57	0.0140873
TRINITY_DN14171_c0_g1_i1	229	84	0.081416
TRINITY_DN2738_c0_g3_i3	276	78	0.0383444
TRINITY_DN25152_c0_g1_i1	315	75	0.0284684
TRINITY_DN6717_c4_g1_i1	219	39	0.0538343
TRINITY_DN33901_c0_g1_i1	300	24	0.0183875
TRINITY_DN17315_c1_g1_i1	290	78	0.044667
TRINITY_DN964_c2_g1_i1	212	27	0.026993
TRINITY_DN13645_c8_g1_i1	238	63	0.0591895
TRINITY_DN45180_c0_g1_i1	318	51	0.0251998
TRINITY_DN58099_c0_g1_i1	487	93	0.00539203
TRINITY_DN66848_c0_g1_i1	405	36	0.00446099
TRINITY_DN75895_c0_g1_i1	249	87	0.0928784
TRINITY_DN86876_c0_g1_i1	320	36	0.0138524
TRINITY_DN20119_c0_g2_i1	382	78	0.0102796
TRINITY_DN3173_c1_g1_i5	660	63	0.000291396
TRINITY_DN2437_c2_g1_i1	218	87	0.109081
TRINITY_DN122_c1_g1_i1	223	33	0.0393349
TRINITY_DN44676_c0_g1_i1	270	15	0.0126215
TRINITY_DN19602_c1_g1_i1	252	30	0.0178429
TRINITY_DN86666_c0_g1_i1	650	60	0.000423225
TRINITY_DN100863_c0_g1_i1	445	87	0.00898336
TRINITY_DN4236_c0_g1_i1	264	99	0.13674
TRINITY_DN131872_c0_g1_i1	340	57	0.0134174
TRINITY_DN21155_c0_g1_i2	321	78	0.0418717
TRINITY_DN10193_c0_g1_i7	909	90	4.53455e-05
TRINITY_DN31837_c0_g1_i1	1163	96	1.79562e-06
TRINITY_DN51865_c0_g1_i1	537	81	0.00377108
TRINITY_DN126970_c0_g1_i1	410	99	0.0204522
TRINITY_DN15954_c0_g1_i1	202	0	1.17442e-08
TRINITY_DN74405_c0_g1_i1	266	54	0.0366647
TRINITY_DN35982_c0_g1_i1	344	72	0.0163158
TRINITY_DN2877_c0_g1_i3	1334	72	6.60884e-08
TRINITY_DN94433_c0_g1_i1	543	99	0.00273575
TRINITY_DN34912_c0_g1_i1	271	66	0.047117
TRINITY_DN111634_c0_g1_i1	647	78	0.000458095
TRINITY_DN120681_c0_g1_i1	689	66	0.000317268
TRINITY_DN76902_c0_g1_i1	308	93	0.0462988
TRINITY_DN10537_c0_g3_i1	386	69	0.00890821
TRINITY_DN131662_c0_g1_i1	320	66	0.0269847
TRINITY_DN12041_c1_g3_i1	239	51	0.0325322
TRINITY_DN96930_c0_g1_i1	223	6	0.0324862
TRINITY_DN10262_c0_g1_i6	346	75	0.0193315
TRINITY_DN11459_c1_g1_i1	406	45	0.00764874
TRINITY_DN98868_c0_g1_i1	341	93	0.038946
TRINITY_DN3836_c2_g2_i1	342	72	0.0158085
TRINITY_DN11112_c0_g1_i3	284	51	0.0222867
TRINITY_DN23721_c0_g1_i1	293	18	0.0150814
TRINITY_DN94223_c0_g1_i1	238	69	0.0676129
TRINITY_DN18748_c2_g1_i1	305	69	0.0329022
TRINITY_DN54730_c0_g1_i1	528	84	0.00194531
TRINITY_DN120471_c0_g1_i1	550	33	0.000493671
TRINITY_DN89321_c0_g1_i1	346	57	0.0125864
TRINITY_DN29800_c0_g1_i1	260	45	0.0405103
TRINITY_DN21308_c0_g3_i1	316	33	0.00832241
TRINITY_DN67649_c0_g1_i1	215	84	0.0980036
TRINITY_DN96720_c0_g1_i1	284	45	0.0255342
TRINITY_DN87677_c0_g1_i1	341	78	0.0241981
TRINITY_DN104878_c0_g1_i1	359	78	0.01423
TRINITY_DN127418_c0_g1_i1	282	54	0.0440177
TRINITY_DN72051_c0_g1_i1	783	87	8.03941e-05
TRINITY_DN12530_c0_g1_i1	243	36	0.029685
TRINITY_DN70403_c0_g1_i1	405	84	0.0185073
TRINITY_DN7308_c4_g1_i1	289	84	0.0736491
TRINITY_DN23511_c0_g1_i1	209	30	0.0348542
TRINITY_DN13119_c0_g1_i2	371	78	0.0172413
TRINITY_DN25449_c0_g1_i1	271	51	0.0239427
TRINITY_DN92369_c0_g1_i1	627	72	0.000645828
TRINITY_DN32848_c0_g1_i1	204	96	0.228757
TRINITY_DN107953_c0_g1_i1	235	45	0.0269068
TRINITY_DN45477_c0_g1_i1	221	60	0.0426325
TRINITY_DN129915_c0_g1_i1	251	87	0.101482
TRINITY_DN74838_c0_g1_i1	680	93	0.000526928
TRINITY_DN840_c23_g1_i13	226	96	0.146595
TRINITY_DN98448_c0_g1_i1	1043	99	4.65473e-06
TRINITY_DN49908_c0_g1_i1	253	0	6.21173e-09
TRINITY_DN58955_c0_g1_i1	437	90	0.00823686
TRINITY_DN69936_c0_g1_i1	285	84	0.0459143
TRINITY_DN8468_c1_g1_i28	404	93	0.0146449
TRINITY_DN123626_c0_g1_i1	379	90	0.0223366
TRINITY_DN30700_c0_g1_i1	241	12	0.0124022
TRINITY_DN16179_c5_g1_i1	338	51	0.019132
TRINITY_DN21657_c0_g1_i1	380	72	0.0134933
TRINITY_DN34286_c0_g1_i1	417	99	0.0161994
TRINITY_DN32638_c0_g1_i1	277	33	0.0230293
TRINITY_DN43619_c0_g1_i1	392	96	0.0170469
TRINITY_DN18697_c0_g3_i1	387	36	0.00661935
TRINITY_DN5525_c2_g1_i1	564	45	0.000652034
TRINITY_DN129705_c0_g1_i1	392	84	0.0139548
TRINITY_DN127771_c0_g1_i1	492	60	0.00293571
TRINITY_DN65295_c0_g1_i1	729	96	0.000329454
TRINITY_DN63647_c0_g1_i1	271	87	0.0796515
TRINITY_DN76276_c0_g1_i1	308	27	0.0177401
TRINITY_DN29384_c0_g1_i1	336	36	0.00971041
TRINITY_DN67792_c0_g1_i1	340	57	0.0163614
TRINITY_DN1633_c0_g2_i1	210	90	0.16045
TRINITY_DN132463_c0_g1_i1	257	30	0.0321224
TRINITY_DN23095_c0_g1_i1	273	81	0.0637592
TRINITY_DN21447_c0_g1_i1	436	63	0.00786227
TRINITY_DN824_c7_g1_i1	247	60	0.0564684
TRINITY_DN107533_c0_g1_i1	299	39	0.0150253
TRINITY_DN41475_c0_g1_i1	289	60	0.0256501
TRINITY_DN116580_c0_g1_i1	239	48	0.0554629
TRINITY_DN52456_c0_g1_i1	337	51	0.0204334
TRINITY_DN127561_c0_g1_i1	1060	72	3.79979e-06
TRINITY_DN76066_c0_g1_i1	466	75	0.00586409
TRINITY_DN16545_c0_g1_i1	383	66	0.0109501
TRINITY_DN7324_c0_g1_i1	313	96	0.0545698
TRINITY_DN72484_c0_g1_i1	435	42	0.00438997
TRINITY_DN2119_c0_g1_i4	671	60	0.000234616
TRINITY_DN112225_c0_g1_i1	493	90	0.00631795
TRINITY_DN12342_c1_g5_i1	495	81	0.00297476
TRINITY_DN110291_c0_g1_i1	235	57	0.0523257
TRINITY_DN107323_c0_g1_i1	729	54	9.31063e-05
TRINITY_DN61293_c0_g1_i1	229	66	0.0780222
TRINITY_DN17401_c2_g1_i1	226	48	0.0493491
TRINITY_DN1904_c0_g1_i19	354	72	0.019421
TRINITY_DN90659_c0_g1_i2	363	90	0.0225863
TRINITY_DN55321_c0_g1_i1	239	33	0.0355616
TRINITY_DN66934_c1_g1_i1	205	63	0.104221
TRINITY_DN17487_c0_g1_i2	215	42	0.0480989
TRINITY_DN88268_c0_g1_i1	311	60	0.0206919
TRINITY_DN125497_c0_g1_i1	501	57	0.00177787
TRINITY_DN128009_c0_g1_i1	443	87	0.00990733
TRINITY_DN7978_c0_g1_i5	690	99	0.000621799
TRINITY_DN13753_c1_g1_i1	208	6	0.0361751
TRINITY_DN6908_c0_g1_i5	357	69	0.0186668
TRINITY_DN77077_c0_g1_i1	274	51	0.0321819
TRINITY_DN88058_c0_g1_i1	318	30	0.00839599
TRINITY_DN28537_c0_g1_i1	776	75	8.88549e-05
TRINITY_DN99039_c0_g1_i1	346	84	0.0309466
TRINITY_DN96807_c0_g1_i1	202	87	0.138131
TRINITY_DN584_c0_g1_i5	770	39	4.77778e-05
TRINITY_DN7903_c1_g1_i4	270	27	0.0179777
TRINITY_DN90518_c0_g1_i1	386	57	0.00673914
TRINITY_DN11552_c0_g1_i3	719	72	0.000148534
TRINITY_DN18980_c0_g1_i2	374	24	0.00332536
TRINITY_DN11184_c4_g1_i1	205	45	0.0792664
TRINITY_DN33361_c1_g1_i1	207	96	0.154533
TRINITY_DN108124_c0_g1_i1	333	36	0.00722589
TRINITY_DN11689_c1_g1_i1	724	84	0.000333744
TRINITY_DN106190_c0_g1_i1	399	57	0.00820704
TRINITY_DN6753_c0_g1_i1	563	69	0.00114451
TRINITY_DN50815_c0_g1_i1	558	69	0.00184195
TRINITY_DN17136_c0_g1_i1	365	27	0.00777375
TRINITY_DN12691_c0_g1_i2	455	78	0.00488949
TRINITY_DN285_c4_g1_i2	512	69	0.00182291
TRINITY_DN37164_c0_g1_i1	312	63	0.0184614
TRINITY_DN81824_c0_g1_i1	287	24	0.0108288
TRINITY_DN94453_c0_g1_i1	493	63	0.00317999
TRINITY_DN34932_c0_g1_i1	210	60	0.056044
TRINITY_DN92805_c0_g1_i1	359	66	0.0147511
TRINITY_DN90871_c0_g1_i1	312	51	0.0133296
TRINITY_DN65941_c0_g1_i1	364	48	0.00975715
TRINITY_DN124189_c0_g2_i1	345	99	0.0471252
TRINITY_DN96950_c0_g1_i1	308	0	3.1254e-09
TRINITY_DN98888_c0_g1_i1	244	30	0.0236935
TRINITY_DN21100_c1_g1_i1	869	96	7.95061e-05
TRINITY_DN10409_c1_g1_i1	290	9	0.00901305
TRINITY_DN50605_c0_g1_i1	225	48	0.0656642
TRINITY_DN16248_c0_g2_i1	212	45	0.0361983
TRINITY_DN70633_c0_g1_i1	709	42	0.000140075
TRINITY_DN23741_c0_g1_i1	346	69	0.0153316
TRINITY_DN1865_c1_g2_i3	338	81	0.0288243
TRINITY_DN54750_c0_g1_i1	236	54	0.0456952
TRINITY_DN96740_c0_g1_i1	294	78	0.0437828
TRINITY_DN87697_c0_g1_i1	293	57	0.0235943
TRINITY_DN37808_c0_g1_i2	235	21	0.0393646
TRINITY_DN103828_c0_g1_i1	833	90	7.45897e-05
TRINITY_DN50399_c0_g1_i1	725	75	0.000219389
TRINITY_DN123856_c0_g1_i1	441	75	0.00995493
TRINITY_DN88845_c0_g1_i2	275	78	0.0788737
TRINITY_DN6193_c1_g1_i1	247	48	0.0256386
TRINITY_DN90451_c0_g1_i1	321	36	0.0122984
TRINITY_DN632_c6_g1_i1	248	63	0.0601856
TRINITY_DN14344_c1_g1_i1	298	39	0.0215085
TRINITY_DN897_c2_g2_i1	428	54	0.00514547
TRINITY_DN21887_c0_g1_i1	241	9	0.0268349
TRINITY_DN20538_c0_g1_i2	435	69	0.00699381
TRINITY_DN52896_c0_g1_i1	745	87	0.0001795
TRINITY_DN5225_c15_g1_i1	317	51	0.0222816
TRINITY_DN94886_c0_g1_i1	587	78	0.00104868
TRINITY_DN2230_c3_g4_i1	231	51	0.0388955
TRINITY_DN58975_c0_g1_i1	354	39	0.00740607
TRINITY_DN57905_c0_g1_i1	592	72	0.00107665
TRINITY_DN77933_c0_g1_i1	247	21	0.0196161
TRINITY_DN88914_c0_g1_i1	591	75	0.00144353
TRINITY_DN10696_c0_g1_i1	487	84	0.00460364
TRINITY_DN20328_c0_g1_i2	288	33	0.0212167
TRINITY_DN107763_c0_g1_i1	310	99	0.0542785
TRINITY_DN34162_c1_g1_i1	259	81	0.0871388
TRINITY_DN91109_c0_g1_i1	749	99	0.00025109
TRINITY_DN4602_c6_g1_i1	208	0	1.08964e-08
TRINITY_DN127791_c0_g1_i1	321	45	0.0165436
TRINITY_DN16775_c0_g1_i1	302	54	0.0219859
TRINITY_DN51616_c0_g1_i1	566	84	0.00113826
TRINITY_DN13492_c0_g1_i2	227	18	0.0286592
TRINITY_DN75226_c0_g1_i1	301	72	0.0304023
TRINITY_DN86207_c0_g1_i1	466	54	0.00279368
TRINITY_DN47784_c0_g1_i1	293	6	0.0136575
TRINITY_DN82625_c0_g1_i1	1587	96	8.63621e-09
TRINITY_DN93606_c0_g1_i1	534	90	0.00206364
TRINITY_DN3554_c1_g1_i3	349	54	0.0112038
TRINITY_DN101474_c0_g1_i1	300	51	0.0214624
TRINITY_DN95886_c1_g1_i1	216	21	0.0360896
TRINITY_DN112455_c0_g1_i1	264	72	0.056376
TRINITY_DN77723_c0_g1_i1	603	96	0.00128261
TRINITY_DN18501_c0_g1_i2	376	45	0.00788932
TRINITY_DN132483_c0_g1_i1	410	48	0.00468497
TRINITY_DN1897_c1_g1_i1	406	75	0.0124698
TRINITY_DN127581_c0_g1_i1	264	87	0.0673272
TRINITY_DN40425_c0_g1_i1	225	24	0.0463197
TRINITY_DN51406_c0_g1_i1	546	78	0.00285206
TRINITY_DN126511_c0_g1_i1	556	90	0.00270828
TRINITY_DN64035_c0_g1_i1	370	81	0.0276759
TRINITY_DN75016_c0_g1_i1	322	87	0.0320317
TRINITY_DN71434_c0_g1_i1	268	90	0.0639946
TRINITY_DN82415_c0_g1_i1	236	51	0.0461725
TRINITY_DN95044_c0_g1_i1	339	51	0.0163747
TRINITY_DN46504_c0_g1_i1	750	75	0.000146087
TRINITY_DN55551_c0_g1_i1	329	69	0.0212261
TRINITY_DN8319_c1_g1_i22	710	72	0.000200815
TRINITY_DN66532_c0_g1_i1	277	42	0.0226011
TRINITY_DN19640_c0_g1_i1	422	57	0.00520692
TRINITY_DN77513_c0_g1_i1	455	78	0.00497947
TRINITY_DN131203_c0_g1_i1	267	45	0.020941
TRINITY_DN88498_c0_g1_i1	733	45	0.000104277
TRINITY_DN99479_c0_g1_i1	336	69	0.0171821
TRINITY_DN6831_c1_g2_i9	1618	96	4.6572e-09
TRINITY_DN71224_c0_g1_i1	327	99	0.0526797
TRINITY_DN7816_c2_g4_i1	425	87	0.0126121
TRINITY_DN91252_c0_g1_i1	1014	84	7.92031e-06
TRINITY_DN33669_c0_g1_i1	273	87	0.0594263
TRINITY_DN77303_c0_g1_i1	520	72	0.00193326
TRINITY_DN119755_c0_g1_i1	237	21	0.0207404
TRINITY_DN86350_c0_g1_i1	228	84	0.123752
TRINITY_DN97331_c0_g1_i1	388	69	0.0126734
TRINITY_DN37810_c0_g1_i1	411	66	0.00847601
TRINITY_DN75659_c0_g1_i1	455	96	0.010169
TRINITY_DN99269_c0_g1_i1	837	84	5.1747e-05
TRINITY_DN39748_c0_g1_i1	596	72	0.0010167
TRINITY_DN40005_c0_g1_i1	279	0	4.48947e-09
TRINITY_DN48795_c0_g1_i1	383	36	0.00477485
TRINITY_DN80061_c0_g1_i1	215	84	0.13533
TRINITY_DN91042_c0_g1_i1	609	96	0.00128081
TRINITY_DN21129_c0_g1_i2	248	39	0.0327116
TRINITY_DN57069_c0_g1_i1	390	39	0.00342667
TRINITY_DN128592_c0_g1_i1	844	75	2.81906e-05
TRINITY_DN64468_c0_g1_i1	694	81	0.00047281
TRINITY_DN39538_c0_g1_i1	334	48	0.0127458
TRINITY_DN84496_c0_g1_i1	555	99	0.00220111
TRINITY_DN87008_c0_g1_i1	361	69	0.0151019
TRINITY_DN48585_c0_g1_i1	357	81	0.0226637
TRINITY_DN59566_c0_g1_i1	246	66	0.0676106
TRINITY_DN100627_c0_g1_i1	279	90	0.0533722
TRINITY_DN113256_c0_g1_i1	213	39	0.046806
TRINITY_DN124237_c0_g1_i1	645	72	0.000716618
TRINITY_DN11287_c0_g1_i1	332	63	0.0259387
TRINITY_DN22268_c0_g1_i1	1434	99	4.86533e-08
TRINITY_DN108354_c0_g1_i1	362	90	0.0252869
TRINITY_DN119335_c0_g1_i1	449	84	0.00806357
TRINITY_DN115753_c0_g1_i1	312	15	0.00636367
TRINITY_DN128382_c0_g1_i1	348	54	0.0127791
TRINITY_DN113046_c0_g1_i1	232	51	0.0409077
TRINITY_DN130842_c0_g1_i1	386	60	0.00780039
TRINITY_DN132004_c0_g1_i1	324	96	0.0342335
TRINITY_DN42086_c0_g1_i1	378	33	0.0066054
TRINITY_DN1545_c5_g1_i1	250	81	0.0615986
TRINITY_DN128172_c0_g1_i1	586	78	0.00090482
TRINITY_DN41016_c0_g1_i1	255	99	0.103922
TRINITY_DN70863_c0_g1_i1	295	78	0.0354228
TRINITY_DN25133_c0_g1_i1	246	33	0.0220132
TRINITY_DN36114_c0_g1_i1	867	24	1.01977e-05
TRINITY_DN2738_c0_g3_i8	358	99	0.0290807
TRINITY_DN56142_c0_g1_i1	688	54	0.000206425
TRINITY_DN840_c28_g1_i2	391	93	0.0217673
TRINITY_DN3791_c0_g1_i11	283	27	0.0135903
TRINITY_DN95900_c0_g1_i1	312	93	0.0586771
TRINITY_DN10429_c1_g1_i1	220	87	0.129917
TRINITY_DN7990_c0_g1_i11	297	69	0.0345312
TRINITY_DN159_c7_g1_i1	292	81	0.0466245
TRINITY_DN90681_c0_g1_i1	275	87	0.0463447
TRINITY_DN2842_c1_g1_i2	281	96	0.0692726
TRINITY_DN109365_c0_g1_i1	246	96	0.107351
TRINITY_DN6263_c0_g1_i11	425	99	0.0110481
TRINITY_DN9928_c0_g1_i1	225	81	0.142532
TRINITY_DN27420_c0_g1_i1	402	90	0.0195499
TRINITY_DN97628_c0_g1_i1	276	12	0.0142853
TRINITY_DN41228_c1_g1_i1	269	45	0.0389971
TRINITY_DN123100_c0_g1_i1	208	90	0.177897
TRINITY_DN114057_c0_g1_i1	352	81	0.0235244
TRINITY_DN30950_c0_g1_i1	1208	99	9.72127e-07
TRINITY_DN125038_c0_g1_i1	207	42	0.0381794
TRINITY_DN11081_c1_g1_i2	213	57	0.0885178
TRINITY_DN23069_c0_g1_i1	304	75	0.0302821
TRINITY_DN63897_c0_g1_i1	313	93	0.0599451
TRINITY_DN7784_c0_g1_i1	298	48	0.0202847
TRINITY_DN65059_c0_g1_i1	308	63	0.021631
TRINITY_DN73808_c0_g1_i1	237	57	0.0560224
TRINITY_DN26916_c0_g1_i1	389	81	0.0165917
TRINITY_DN82855_c0_g1_i1	249	72	0.068933
TRINITY_DN49176_c0_g1_i1	946	99	2.97252e-05
TRINITY_DN93836_c0_g1_i1	512	75	0.00312415
TRINITY_DN3512_c0_g2_i17	223	90	0.12408
TRINITY_DN4011_c0_g3_i1	525	90	0.0033751
TRINITY_DN99915_c0_g1_i1	263	78	0.0794974
TRINITY_DN10572_c1_g1_i1	323	54	0.0122968
TRINITY_DN80148_c0_g1_i1	326	63	0.0229658
TRINITY_DN20627_c0_g1_i1	243	93	0.110882
TRINITY_DN31608_c0_g1_i1	269	39	0.0183369
TRINITY_DN9368_c1_g1_i1	603	96	0.00130099
TRINITY_DN91692_c0_g1_i1	208	72	0.125961
TRINITY_DN66762_c0_g1_i1	328	63	0.0260267
TRINITY_DN86790_c0_g1_i1	435	78	0.00688129
TRINITY_DN97771_c0_g1_i1	346	81	0.0271869
TRINITY_DN131433_c0_g1_i1	301	45	0.0191276
TRINITY_DN103991_c0_g1_i1	358	63	0.0145294
TRINITY_DN40445_c0_g1_i1	253	93	0.114209
TRINITY_DN133930_c0_g1_i1	292	96	0.0539557
TRINITY_DN71454_c0_g1_i1	201	45	0.0735316
TRINITY_DN82435_c0_g1_i1	375	69	0.0105076
TRINITY_DN124887_c0_g1_i1	407	81	0.0161645
TRINITY_DN3011_c0_g1_i2	474	90	0.00481012
TRINITY_DN17309_c1_g1_i1	201	36	0.0493734
TRINITY_DN55571_c0_g1_i1	492	90	0.00611616
TRINITY_DN53923_c0_g1_i1	322	99	0.0504694
TRINITY_DN73951_c0_g1_i1	375	99	0.0246299
TRINITY_DN120242_c0_g1_i1	687	39	0.000199887
TRINITY_DN102711_c0_g1_i1	413	66	0.00653657
TRINITY_DN69638_c0_g1_i2	565	54	0.000874773
TRINITY_DN71244_c0_g1_i1	282	78	0.0517355
TRINITY_DN42029_c1_g1_i1	261	21	0.0141767
TRINITY_DN4150_c0_g1_i1	709	93	0.000377691
TRINITY_DN90202_c0_g1_i1	290	63	0.0451607
TRINITY_DN119775_c0_g1_i1	679	90	0.000381561
TRINITY_DN3731_c1_g1_i6	537	60	0.00116426
TRINITY_DN62760_c0_g1_i1	338	90	0.0268187
TRINITY_DN19356_c0_g2_i1	251	72	0.0454323
TRINITY_DN64698_c0_g1_i1	956	66	9.42246e-06
TRINITY_DN75679_c0_g1_i1	248	78	0.0678835
TRINITY_DN4725_c0_g1_i3	637	81	0.000570996
TRINITY_DN16457_c0_g1_i2	523	99	0.00382867
TRINITY_DN85300_c0_g1_i1	332	66	0.0250268
TRINITY_DN63628_c0_g1_i1	275	75	0.0467937
TRINITY_DN74609_c0_g1_i1	280	93	0.0959061
TRINITY_DN102501_c0_g1_i1	719	69	0.000139087
TRINITY_DN59796_c0_g1_i1	271	87	0.0475773
TRINITY_DN58726_c0_g1_i1	316	18	0.00713931
TRINITY_DN113486_c0_g1_i1	223	84	0.13135
TRINITY_DN111838_c0_g1_i1	290	66	0.024893
TRINITY_DN124467_c0_g1_i1	695	78	0.000320529
TRINITY_DN80081_c0_g1_i1	225	78	0.129274
TRINITY_DN78754_c0_g1_i1	226	0	8.70269e-09
TRINITY_DN131866_c0_g1_i1	494	99	0.00539785
TRINITY_DN33479_c0_g1_i1	481	72	0.00462054
TRINITY_DN108584_c0_g1_i1	402	72	0.00764591
TRINITY_DN43100_c0_g1_i1	279	72	0.0497766
TRINITY_DN230_c0_g2_i2	354	36	0.00621276
TRINITY_DN17596_c0_g1_i1	995	81	1.11046e-05
TRINITY_DN52437_c0_g1_i1	265	45	0.0230638
TRINITY_DN12665_c0_g1_i2	682	66	0.000345288
TRINITY_DN87028_c0_g1_i1	269	42	0.0300737
TRINITY_DN27507_c0_g1_i1	560	45	0.000595864
TRINITY_DN102295_c0_g1_i1	563	33	0.000607161
TRINITY_DN58516_c0_g1_i1	353	78	0.018557
TRINITY_DN113276_c0_g1_i1	273	81	0.0488491
TRINITY_DN1531_c4_g2_i1	236	27	0.0233579
TRINITY_DN67563_c0_g1_i1	362	75	0.0211908
TRINITY_DN2163_c0_g1_i167	805	84	8.97961e-05
TRINITY_DN104792_c0_g1_i1	562	75	0.00119636
TRINITY_DN127332_c0_g1_i1	297	45	0.0268615
TRINITY_DN109801_c0_g1_i1	360	93	0.0188955
TRINITY_DN47325_c0_g1_i1	457	72	0.00613784
TRINITY_DN58306_c0_g1_i1	267	63	0.037532
TRINITY_DN12316_c1_g1_i3	249	96	0.0734111
TRINITY_DN67353_c0_g1_i1	587	75	0.000973414
TRINITY_DN12948_c2_g1_i3	301	27	0.0126968
TRINITY_DN18813_c0_g1_i1	297	33	0.0105946
TRINITY_DN87381_c0_g1_i1	385	84	0.0119919
TRINITY_DN27860_c0_g1_i1	749	99	0.000286774
TRINITY_DN132024_c0_g1_i1	547	63	0.00119722
TRINITY_DN7281_c0_g4_i1	357	69	0.0168286
TRINITY_DN41036_c0_g1_i1	381	66	0.00980417
TRINITY_DN50083_c0_g1_i1	339	51	0.00923845
TRINITY_DN14172_c0_g1_i1	218	54	0.0835876
TRINITY_DN134521_c0_g1_i1	208	60	0.0627623
TRINITY_DN72045_c0_g1_i1	365	6	0.00566761
TRINITY_DN23505_c0_g1_i1	220	33	0.0235568
TRINITY_DN92073_c0_g1_i1	245	69	0.0409227
TRINITY_DN3935_c1_g1_i1	214	48	0.0526362
TRINITY_DN45181_c0_g1_i1	347	84	0.0314534
TRINITY_DN4234_c1_g1_i2	254	6	0.0222903
TRINITY_DN56162_c0_g1_i1	272	36	0.0145476
TRINITY_DN17925_c0_g2_i1	269	33	0.0184531
TRINITY_DN27650_c0_g1_i1	283	36	0.0204311
TRINITY_DN98152_c0_g1_i1	291	45	0.0145503
TRINITY_DN2946_c0_g1_i10	832	96	6.84875e-05
TRINITY_DN123330_c0_g1_i1	995	78	6.30898e-06
TRINITY_DN134311_c0_g1_i1	360	75	0.0223092
TRINITY_DN125268_c0_g1_i1	800	81	8.02628e-05
TRINITY_DN52370_c0_g1_i1	453	66	0.00459662
TRINITY_DN9564_c0_g2_i1	667	42	0.000145403
TRINITY_DN65289_c0_g1_i1	240	72	0.0824143
TRINITY_DN7870_c1_g1_i1	325	66	0.0250211
TRINITY_DN103096_c0_g1_i1	411	69	0.00682338
TRINITY_DN59317_c0_g1_i1	286	39	0.0193488
TRINITY_DN125058_c0_g1_i1	424	93	0.0126366
TRINITY_DN21151_c0_g1_i1	301	87	0.0549724
TRINITY_DN109175_c0_g1_i1	370	81	0.0168556
TRINITY_DN54098_c0_g1_i1	564	84	0.0017668
TRINITY_DN71894_c0_g1_i1	410	81	0.0111338
TRINITY_DN49196_c0_g1_i1	236	27	0.0352775
TRINITY_DN93856_c0_g1_i1	492	51	0.0031237
TRINITY_DN95018_c0_g1_i1	357	78	0.0200517
TRINITY_DN59107_c0_g1_i1	208	72	0.118801
TRINITY_DN2875_c2_g3_i1	327	84	0.031418
TRINITY_DN15758_c0_g1_i3	334	93	0.0289447
TRINITY_DN7117_c0_g3_i2	867	96	4.65008e-05
TRINITY_DN71684_c0_g1_i1	270	75	0.048704
TRINITY_DN9388_c1_g1_i1	238	78	0.113032
TRINITY_DN13957_c1_g1_i1	408	93	0.0148349
TRINITY_DN20297_c1_g1_i1	237	78	0.0860941
TRINITY_DN133950_c0_g1_i1	344	45	0.00754444
TRINITY_DN11953_c0_g1_i1	536	81	0.00195038
TRINITY_DN2732_c0_g1_i1	346	75	0.018015
TRINITY_DN3031_c0_g1_i2	457	75	0.00530256
TRINITY_DN8108_c1_g1_i1	207	84	0.112739
TRINITY_DN31981_c0_g1_i1	671	99	0.000721768
TRINITY_DN42962_c0_g1_i1	451	33	0.00175498
TRINITY_DN8811_c0_g1_i1	436	78	0.0056067
TRINITY_DN108880_c1_g1_i1	506	87	0.00392145
TRINITY_DN14813_c3_g1_i1	290	87	0.0415799
TRINITY_DN85530_c0_g1_i1	434	87	0.00676545
TRINITY_DN17892_c1_g1_i1	497	87	0.00403833
TRINITY_DN96511_c0_g1_i1	311	90	0.042607
TRINITY_DN20790_c0_g1_i1	278	33	0.0164772
TRINITY_DN106661_c3_g1_i1	261	87	0.0516308
TRINITY_DN89965_c0_g1_i1	370	63	0.0112215
TRINITY_DN22584_c1_g1_i1	361	66	0.01849
TRINITY_DN6596_c2_g1_i1	427	57	0.00456049
TRINITY_DN226_c0_g1_i27	1200	93	9.19545e-07
TRINITY_DN61710_c0_g1_i1	304	51	0.0280879
TRINITY_DN18938_c1_g2_i1	471	75	0.00331619
TRINITY_DN15407_c0_g1_i2	278	0	4.54589e-09
TRINITY_DN9392_c2_g1_i2	239	93	0.133891
TRINITY_DN85180_c1_g1_i1	208	45	0.0489563
TRINITY_DN78774_c0_g1_i1	245	27	0.0402825
TRINITY_DN123417_c0_g1_i1	579	84	0.00120005
TRINITY_DN130816_c0_g1_i1	412	99	0.0132359
TRINITY_DN61500_c0_g1_i1	373	90	0.0252098
TRINITY_DN114933_c0_g1_i1	515	96	0.00438098
TRINITY_DN16162_c0_g2_i1	251	24	0.0259318
TRINITY_DN7046_c0_g1_i2	313	33	0.0145628
TRINITY_DN74419_c0_g1_i1	345	93	0.034369
TRINITY_DN7957_c1_g1_i1	346	99	0.0281041
TRINITY_DN94447_c0_g1_i1	226	54	0.0531017
TRINITY_DN34926_c0_g1_i1	264	60	0.0313678
TRINITY_DN47555_c0_g1_i1	348	39	0.00783058
TRINITY_DN32992_c0_g1_i1	294	15	0.010425
TRINITY_DN65935_c0_g1_i1	1149	96	2.19537e-06
TRINITY_DN89545_c0_g1_i1	275	93	0.0879272
TRINITY_DN10113_c1_g1_i1	1427	90	2.94671e-08
TRINITY_DN61294_c0_g1_i1	237	45	0.0391047
TRINITY_DN13053_c0_g1_i2	571	81	0.00141504
TRINITY_DN34716_c0_g1_i1	272	27	0.022154
TRINITY_DN32782_c0_g1_i1	203	48	0.0804556
TRINITY_DN54744_c0_g1_i1	333	75	0.0356306
TRINITY_DN18833_c0_g1_i1	377	66	0.0148086
TRINITY_DN9612_c0_g1_i1	887	87	5.02337e-05
TRINITY_DN74772_c0_g1_i1	473	63	0.0025489
TRINITY_DN27880_c0_g1_i1	379	63	0.010543
TRINITY_DN121063_c0_g1_i1	397	63	0.00554493
TRINITY_DN3008_c1_g2_i1	351	6	0.00530031
TRINITY_DN97312_c0_g1_i1	212	81	0.103095
TRINITY_DN1458_c1_g1_i1	539	72	0.00160592
TRINITY_DN103532_c0_g1_i1	375	78	0.0130969
TRINITY_DN68800_c0_g1_i1	225	96	0.119876
TRINITY_DN23_c1_g1_i1	263	90	0.078953
TRINITY_DN101888_c0_g1_i1	343	30	0.00731599
TRINITY_DN21591_c0_g1_i1	608	84	0.001304
TRINITY_DN43553_c0_g1_i1	246	90	0.0737021
TRINITY_DN11199_c0_g1_i2	500	51	0.00169753
TRINITY_DN91023_c0_g1_i1	281	39	0.0282647
TRINITY_DN63581_c0_g1_i1	664	54	0.000178064
TRINITY_DN127995_c0_g1_i1	656	96	0.000605808
TRINITY_DN86121_c0_g1_i1	746	93	0.000308466
TRINITY_DN26600_c0_g1_i1	816	93	9.42203e-05
TRINITY_DN97102_c0_g1_i1	294	75	0.0348048
TRINITY_DN39519_c0_g1_i1	258	81	0.0813587
TRINITY_DN1988_c0_g1_i9	467	45	0.00246788
TRINITY_DN101678_c0_g1_i1	1033	99	6.13705e-06
TRINITY_DN112659_c0_g1_i1	277	81	0.0622441
TRINITY_DN125288_c0_g1_i1	311	51	0.0167823
TRINITY_DN79575_c0_g1_i1	241	72	0.0701977
TRINITY_DN132687_c0_g1_i1	229	84	0.115341
TRINITY_DN5881_c3_g1_i1	205	60	0.0683407
TRINITY_DN51320_c0_g1_i1	534	75	0.00282616
TRINITY_DN4811_c3_g1_i1	262	57	0.0370836
TRINITY_DN8514_c0_g2_i1	221	33	0.0336667
TRINITY_DN40971_c1_g1_i1	279	39	0.0208255
TRINITY_DN53258_c0_g1_i1	635	90	0.000659152
TRINITY_DN62933_c1_g1_i1	239	15	0.0180782
TRINITY_DN126715_c0_g1_i1	515	93	0.00359059
TRINITY_DN28328_c0_g1_i1	227	24	0.0222793
TRINITY_DN93310_c0_g1_i1	293	39	0.0153268
TRINITY_DN8885_c5_g1_i1	491	81	0.00449128
TRINITY_DN17979_c1_g1_i1	266	75	0.0559728
TRINITY_DN95248_c0_g1_i1	397	69	0.0103033
TRINITY_DN46708_c0_g1_i1	1119	93	2.0602e-06
TRINITY_DN19844_c0_g1_i1	285	21	0.00964648
TRINITY_DN77717_c0_g1_i1	446	69	0.00532922
TRINITY_DN99393_c0_g1_i1	281	93	0.0662032
TRINITY_DN131407_c0_g1_i1	258	39	0.0266091
TRINITY_DN108125_c0_g1_i1	1148	87	1.79855e-06
TRINITY_DN42067_c0_g1_i1	207	90	0.151391
TRINITY_DN115524_c0_g1_i1	288	36	0.0191516
TRINITY_DN62723_c1_g1_i1	289	63	0.0253793
TRINITY_DN126505_c0_g1_i1	402	54	0.00621559
TRINITY_DN84057_c0_g1_i1	400	75	0.011317
TRINITY_DN24536_c0_g1_i1	282	66	0.0322499
TRINITY_DN37165_c0_g1_i1	289	72	0.04624
TRINITY_DN95038_c0_g1_i1	268	60	0.0424534
TRINITY_DN92806_c0_g1_i1	213	57	0.0777284
TRINITY_DN57193_c0_g1_i1	398	45	0.00545303
TRINITY_DN79155_c0_g1_i1	216	84	0.0755085
TRINITY_DN120216_c0_g1_i1	264	48	0.0199954
TRINITY_DN11336_c2_g1_i1	263	93	0.0946131
TRINITY_DN104333_c0_g1_i1	299	42	0.0253939
TRINITY_DN2962_c0_g1_i1	631	96	0.000727653
TRINITY_DN9074_c0_g1_i5	237	90	0.130608
TRINITY_DN8338_c1_g1_i1	262	45	0.0363674
TRINITY_DN126299_c0_g1_i1	266	90	0.0687984
TRINITY_DN33373_c0_g1_i1	488	66	0.00216802
TRINITY_DN12907_c1_g1_i1	202	60	0.0758015
TRINITY_DN19424_c0_g1_i1	502	99	0.0062182
TRINITY_DN28471_c0_g1_i1	240	45	0.04529
TRINITY_DN120006_c0_g1_i1	599	81	0.00108143
TRINITY_DN59480_c0_g1_i1	385	75	0.0126418
TRINITY_DN104123_c0_g1_i1	419	27	0.00440604
TRINITY_DN115104_c0_g1_i1	265	42	0.0284665
TRINITY_DN113170_c0_g1_i1	369	72	0.0107903
TRINITY_DN13135_c0_g1_i1	343	81	0.0295195
TRINITY_DN132900_c0_g1_i1	280	87	0.0473322
TRINITY_DN8844_c0_g1_i3	237	45	0.035394
TRINITY_DN126089_c0_g1_i1	310	63	0.0240761
TRINITY_DN108558_c0_g1_i1	397	45	0.00663592
TRINITY_DN6682_c3_g1_i1	268	45	0.0235732
TRINITY_DN9315_c0_g2_i1	750	57	8.43916e-05
TRINITY_DN83902_c0_g1_i1	279	96	0.0914222
TRINITY_DN63878_c0_g1_i1	568	51	0.000979074
TRINITY_DN16627_c4_g1_i1	271	60	0.0469009
TRINITY_DN37598_c0_g1_i1	307	42	0.0121285
TRINITY_DN58200_c0_g1_i1	347	57	0.00924927
TRINITY_DN81055_c1_g1_i1	590	69	0.000754376
TRINITY_DN17070_c0_g1_i1	410	30	0.00346933
TRINITY_DN5402_c3_g1_i1	233	90	0.0729714
TRINITY_DN41562_c1_g1_i1	320	54	0.0147406
TRINITY_DN7467_c7_g1_i1	441	57	0.00569537
TRINITY_DN5907_c0_g1_i1	334	90	0.0287241
TRINITY_DN83696_c0_g1_i1	1340	96	1.62636e-07
TRINITY_DN83552_c1_g1_i1	260	39	0.0368485
TRINITY_DN8703_c0_g1_i2	867	78	3.47138e-05
TRINITY_DN10343_c1_g1_i1	257	60	0.0376634
TRINITY_DN455_c0_g3_i1	525	81	0.0035018
TRINITY_DN114953_c0_g1_i1	266	27	0.0138188
TRINITY_DN50829_c0_g1_i1	665	87	0.000569438
TRINITY_DN70857_c0_g1_i1	295	45	0.0182091
TRINITY_DN23965_c0_g1_i1	376	99	0.0172803
TRINITY_DN9266_c5_g1_i1	213	30	0.0436603
TRINITY_DN90885_c0_g1_i1	502	36	0.000850579
TRINITY_DN36108_c0_g1_i1	405	51	0.00378266
TRINITY_DN43993_c0_g1_i1	724	96	0.00043086
TRINITY_DN14778_c1_g1_i1	258	99	0.108423
TRINITY_DN85983_c0_g1_i1	309	27	0.00960619
TRINITY_DN984_c1_g2_i3	307	99	0.0951843
TRINITY_DN84913_c0_g1_i1	327	81	0.0386182
TRINITY_DN21114_c1_g1_i1	426	63	0.00403656
TRINITY_DN7383_c1_g2_i1	342	36	0.00608892
TRINITY_DN8782_c0_g1_i4	384	99	0.0171384
TRINITY_DN29062_c0_g1_i1	221	51	0.0367008
TRINITY_DN93750_c0_g1_i1	683	75	0.000325345
TRINITY_DN68820_c0_g1_i1	596	93	0.00159768
TRINITY_DN95688_c0_g1_i1	242	99	0.128114
TRINITY_DN79801_c0_g1_i1	259	72	0.0546149
TRINITY_DN112889_c0_g1_i1	586	99	0.0017101
TRINITY_DN122510_c0_g1_i1	278	72	0.0444264
TRINITY_DN60034_c0_g1_i1	203	99	0.185407
TRINITY_DN111819_c0_g1_i1	337	87	0.0373335
TRINITY_DN4130_c2_g1_i2	303	18	0.008005
TRINITY_DN91043_c0_g1_i1	359	45	0.0105562
TRINITY_DN131847_c0_g1_i1	219	15	0.0205252
TRINITY_DN51550_c0_g1_i1	258	66	0.0453291
TRINITY_DN73512_c0_g1_i1	411	96	0.0158985
TRINITY_DN7778_c0_g1_i1	402	87	0.0138084
TRINITY_DN126945_c0_g1_i1	435	93	0.0142957
TRINITY_DN64469_c0_g1_i1	425	63	0.00554769
TRINITY_DN15929_c0_g1_i1	1287	60	1.05766e-07
TRINITY_DN93540_c0_g1_i1	318	84	0.0306122
TRINITY_DN24976_c0_g1_i1	274	75	0.0547318
TRINITY_DN66966_c0_g1_i1	308	90	0.070666
TRINITY_DN100628_c0_g1_i1	570	96	0.00230808
TRINITY_DN77947_c0_g1_i1	345	51	0.0177462
TRINITY_DN124238_c0_g1_i1	216	90	0.152756
TRINITY_DN51340_c0_g1_i1	580	84	0.00158557
TRINITY_DN16301_c0_g3_i1	222	78	0.0848502
TRINITY_DN40649_c0_g1_i1	329	45	0.0134803
TRINITY_DN115754_c0_g1_i1	228	60	0.0684543
TRINITY_DN60677_c0_g1_i1	318	27	0.012574
TRINITY_DN13785_c0_g1_i1	411	66	0.0096841
TRINITY_DN37395_c0_g1_i1	338	48	0.0100562
TRINITY_DN95268_c0_g1_i1	619	96	0.00124075
TRINITY_DN46728_c0_g1_i1	209	54	0.0656552
TRINITY_DN44794_c0_g1_i1	229	78	0.0987534
TRINITY_DN19864_c0_g1_i1	360	48	0.0132611
TRINITY_DN86784_c0_g1_i1	307	96	0.0373048
TRINITY_DN133075_c0_g1_i1	263	78	0.0456396
TRINITY_DN104563_c0_g1_i1	334	24	0.00599715
TRINITY_DN42087_c0_g1_i1	242	57	0.070278
TRINITY_DN40439_c0_g1_i1	514	75	0.00338575
TRINITY_DN115544_c0_g1_i1	266	0	5.28085e-09
TRINITY_DN124591_c0_g1_i1	1178	75	7.12607e-07
TRINITY_DN13575_c0_g1_i1	279	78	0.0444994
TRINITY_DN80495_c0_g1_i1	211	99	0.137741
TRINITY_DN8424_c2_g1_i1	226	42	0.0358453
TRINITY_DN44584_c0_g1_i1	302	39	0.0127805
TRINITY_DN83639_c1_g1_i1	571	96	0.00160535
TRINITY_DN16371_c0_g1_i2	326	21	0.0101172
TRINITY_DN2333_c0_g2_i5	461	45	0.00278464
TRINITY_DN104353_c0_g1_i1	312	78	0.0300797
TRINITY_DN115334_c0_g1_i1	274	96	0.0557715
TRINITY_DN16125_c1_g2_i1	414	75	0.0134905
TRINITY_DN4776_c1_g1_i1	357	63	0.0129162
TRINITY_DN12543_c1_g2_i1	201	0	1.18918e-08
TRINITY_DN106850_c0_g1_i1	311	18	0.0119495
TRINITY_DN44374_c0_g1_i1	440	84	0.00671439
TRINITY_DN32323_c0_g1_i1	513	72	0.00245877
TRINITY_DN119769_c0_g1_i1	300	24	0.0101378
TRINITY_DN28491_c0_g1_i1	941	96	2.49819e-05
TRINITY_DN38402_c0_g1_i1	280	51	0.0282056
TRINITY_DN58430_c0_g1_i1	813	93	9.88918e-05
TRINITY_DN124171_c0_g1_i1	577	81	0.00123931
TRINITY_DN15682_c11_g1_i1	202	24	0.0403593
TRINITY_DN102499_c0_g1_i1	559	69	0.00113215
TRINITY_DN4566_c1_g1_i1	272	90	0.062429
TRINITY_DN33183_c0_g1_i1	384	18	0.00315256
TRINITY_DN41160_c0_g1_i1	400	87	0.0103538
TRINITY_DN27211_c0_g1_i1	510	90	0.00326797
TRINITY_DN54079_c0_g1_i1	378	60	0.0132138
TRINITY_DN96069_c0_g1_i1	325	96	0.0569616
TRINITY_DN47529_c0_g1_i1	214	66	0.101413
TRINITY_DN14871_c0_g1_i3	364	66	0.0127338
TRINITY_DN12279_c9_g1_i1	333	60	0.0153276
TRINITY_DN14764_c0_g2_i1	229	69	0.0749375
TRINITY_DN105364_c0_g1_i1	1050	63	1.93863e-06
TRINITY_DN116345_c0_g1_i1	293	45	0.0159049
TRINITY_DN6995_c0_g1_i16	488	96	0.0051525
TRINITY_DN47319_c0_g1_i1	901	84	2.84406e-05
TRINITY_DN67347_c0_g1_i1	486	90	0.00494325
TRINITY_DN26991_c0_g1_i2	397	84	0.0115685
TRINITY_DN87375_c0_g1_i1	442	36	0.00208239
TRINITY_DN132018_c0_g1_i1	466	63	0.00393232
TRINITY_DN105154_c0_g1_i1	481	99	0.00726716
TRINITY_DN103506_c0_g1_i1	355	51	0.0135237
TRINITY_DN7221_c1_g1_i1	382	63	0.00705532
TRINITY_DN125182_c0_g1_i1	526	87	0.00306309
TRINITY_DN18046_c0_g1_i5	854	75	4.1098e-05
TRINITY_DN34194_c0_g1_i1	246	51	0.0395115
TRINITY_DN4940_c0_g3_i3	736	81	0.000210131
TRINITY_DN5862_c1_g1_i3	413	75	0.0109266
TRINITY_DN93980_c0_g1_i1	276	84	0.045095
TRINITY_DN39203_c0_g1_i1	340	39	0.0146619
TRINITY_DN16524_c1_g1_i2	248	99	0.15784
TRINITY_DN102618_c0_g2_i1	321	45	0.0164148
TRINITY_DN117_c1_g1_i1	1155	93	2.03344e-06
TRINITY_DN13645_c5_g1_i1	344	90	0.020226
TRINITY_DN119000_c0_g1_i1	367	75	0.0203365
TRINITY_DN93770_c0_g1_i1	303	96	0.0491631
TRINITY_DN1292_c25_g1_i13	340	54	0.00956562
TRINITY_DN59021_c0_g1_i1	231	69	0.0542179
TRINITY_DN632_c0_g3_i4	733	78	0.000282394
TRINITY_DN134099_c0_g1_i1	266	66	0.0592872
TRINITY_DN131867_c0_g1_i1	398	66	0.00736535
TRINITY_DN22355_c1_g1_i1	426	60	0.00398745
TRINITY_DN4719_c2_g1_i1	224	63	0.0638052
TRINITY_DN40879_c0_g1_i1	294	90	0.0389686
TRINITY_DN6223_c3_g1_i1	264	0	5.41441e-09
TRINITY_DN93560_c0_g1_i1	415	69	0.0081796
TRINITY_DN6138_c1_g2_i11	647	48	0.000316817
TRINITY_DN17453_c1_g1_i1	269	96	0.0937242
TRINITY_DN71888_c0_g1_i1	346	54	0.00961832
TRINITY_DN24996_c0_g1_i1	287	93	0.0571419
TRINITY_DN35977_c0_g1_i1	335	90	0.0386963
TRINITY_DN66986_c0_g1_i1	219	81	0.144824
TRINITY_DN77967_c0_g1_i1	241	99	0.110197
TRINITY_DN131657_c0_g1_i1	349	72	0.0181449
TRINITY_DN4269_c1_g2_i1	368	48	0.00828087
TRINITY_DN104793_c0_g1_i1	221	27	0.0280955
TRINITY_DN11652_c3_g1_i1	448	48	0.00303395
TRINITY_DN6518_c0_g1_i1	612	84	0.000796452
TRINITY_DN71678_c0_g1_i1	320	81	0.0319072
TRINITY_DN13661_c1_g1_i1	427	87	0.011475
TRINITY_DN70608_c0_g1_i1	349	78	0.0234434
TRINITY_DN48252_c1_g1_i1	381	63	0.00908829
TRINITY_DN55795_c0_g1_i1	615	66	0.000857784
TRINITY_DN90636_c0_g1_i1	386	63	0.00706268
TRINITY_DN65706_c0_g1_i1	274	57	0.033392
TRINITY_DN5458_c0_g1_i4	304	63	0.0257898
TRINITY_DN96715_c0_g1_i1	337	84	0.032127
TRINITY_DN111982_c0_g1_i1	378	78	0.0127931
TRINITY_DN4374_c0_g1_i1	459	72	0.004053
TRINITY_DN21293_c0_g1_i2	233	66	0.0471007
TRINITY_DN83027_c0_g1_i1	802	99	0.00011375
TRINITY_DN15389_c1_g1_i1	202	3	8.76085e-09
TRINITY_DN14446_c5_g1_i1	377	99	0.0239645
TRINITY_DN90426_c0_g1_i1	618	99	0.000920876
TRINITY_DN18220_c0_g2_i1	271	39	0.0222223
TRINITY_DN118929_c0_g1_i1	279	69	0.0448479
TRINITY_DN23790_c0_g1_i2	289	69	0.0317896
TRINITY_DN85524_c0_g1_i1	260	90	0.0701598
TRINITY_DN96505_c0_g1_i1	400	57	0.00868098
TRINITY_DN83590_c0_g1_i1	820	96	8.50636e-05
TRINITY_DN6895_c0_g1_i7	459	72	0.00547557
TRINITY_DN69641_c0_g1_i1	381	45	0.00664902
TRINITY_DN36988_c0_g1_i1	270	21	0.0181368
TRINITY_DN89959_c0_g1_i1	415	99	0.0189506
TRINITY_DN3726_c1_g1_i1	490	57	0.00206423
TRINITY_DN32343_c0_g1_i1	500	75	0.00360475
TRINITY_DN132668_c0_g1_i1	301	81	0.0494451
TRINITY_DN54305_c0_g1_i1	443	81	0.00786333
TRINITY_DN107738_c0_g1_i1	359	60	0.014431
TRINITY_DN52371_c0_g1_i1	815	75	8.49809e-05
TRINITY_DN14812_c0_g1_i1	438	72	0.00870575
TRINITY_DN85314_c0_g1_i1	355	93	0.0243629
TRINITY_DN94361_c0_g1_i1	321	69	0.0211596
TRINITY_DN58450_c0_g1_i1	594	78	0.000950654
TRINITY_DN69431_c0_g1_i1	674	75	0.00039453
TRINITY_DN96299_c0_g1_i1	209	81	0.143005
TRINITY_DN67787_c0_g1_i1	611	51	0.000396407
TRINITY_DN3011_c4_g1_i1	612	93	0.00108129
TRINITY_DN89749_c0_g1_i1	343	75	0.017221
TRINITY_DN3764_c2_g2_i1	234	21	0.0173603
TRINITY_DN132458_c0_g1_i1	339	63	0.0145806
TRINITY_DN10444_c5_g1_i1	333	39	0.0105787
TRINITY_DN52161_c0_g1_i1	315	45	0.0185769
TRINITY_DN63142_c0_g1_i1	471	99	0.00666005
TRINITY_DN6645_c0_g4_i1	308	96	0.0721349
TRINITY_DN30489_c0_g1_i1	1452	90	2.33359e-08
TRINITY_DN14602_c0_g1_i1	412	99	0.0198329
TRINITY_DN103946_c0_g1_i1	296	66	0.0417687
TRINITY_DN114927_c0_g1_i1	257	36	0.0342202
TRINITY_DN4424_c0_g2_i2	291	60	0.0394967
TRINITY_DN7661_c1_g1_i1	394	51	0.00723237
TRINITY_DN94151_c0_g1_i1	270	6	0.018327
TRINITY_DN34630_c0_g1_i1	558	81	0.00189181
TRINITY_DN61498_c0_g1_i1	268	78	0.0506828
TRINITY_DN96089_c0_g1_i1	240	90	0.0994238
TRINITY_DN36568_c0_g1_i1	282	9	0.00924774
TRINITY_DN47549_c0_g1_i1	403	45	0.00704011
TRINITY_DN130310_c0_g1_i1	304	60	0.0282877
TRINITY_DN66507_c0_g1_i1	545	90	0.00260342
TRINITY_DN132248_c0_g1_i1	529	81	0.00233424
TRINITY_DN30279_c0_g1_i1	391	81	0.0172019
TRINITY_DN103736_c0_g1_i1	364	99	0.0211303
TRINITY_DN127346_c0_g1_i1	523	81	0.00237541
TRINITY_DN61288_c0_g1_i1	222	0	9.14848e-09
TRINITY_DN13047_c0_g1_i2	414	69	0.00551796
TRINITY_DN25377_c0_g1_i1	201	72	0.112236
TRINITY_DN5175_c0_g1_i1	270	78	0.0435889
TRINITY_DN36358_c0_g1_i1	377	90	0.0242684
TRINITY_DN32776_c0_g1_i1	549	99	0.00335587
TRINITY_DN12609_c1_g1_i2	238	84	0.0714236
TRINITY_DN55316_c0_g1_i1	342	93	0.0348462
TRINITY_DN5460_c0_g1_i3	351	42	0.00820094
TRINITY_DN19405_c0_g1_i1	349	87	0.0232347
TRINITY_DN97306_c0_g1_i1	378	66	0.0182469
TRINITY_DN30069_c0_g1_i1	678	93	0.000579841
TRINITY_DN71331_c1_g1_i1	283	75	0.040966
TRINITY_DN4022_c4_g1_i1	308	66	0.028349
TRINITY_DN4654_c5_g1_i1	232	81	0.061003
TRINITY_DN91017_c0_g1_i1	385	96	0.026313
TRINITY_DN106601_c0_g1_i1	373	63	0.0112837
TRINITY_DN44125_c0_g1_i1	365	75	0.0154796
TRINITY_DN62897_c0_g2_i1	452	75	0.00538212
TRINITY_DN75134_c0_g1_i1	419	33	0.00522444
TRINITY_DN28242_c0_g1_i1	431	57	0.00532365
TRINITY_DN86115_c0_g1_i1	795	93	0.000130165
TRINITY_DN95162_c0_g1_i1	242	66	0.087063
TRINITY_DN101382_c0_g1_i1	264	75	0.0589574
TRINITY_DN137_c1_g1_i1	264	72	0.0598
TRINITY_DN15403_c0_g1_i1	727	87	0.000355804
TRINITY_DN39013_c0_g1_i1	377	93	0.0344388
TRINITY_DN2230_c14_g1_i1	249	0	6.52991e-09
TRINITY_DN48060_c0_g1_i1	649	75	0.000398077
TRINITY_DN23877_c0_g1_i2	388	69	0.0159049
TRINITY_DN68378_c0_g1_i1	255	30	0.0185722
TRINITY_DN79359_c0_g1_i1	286	96	0.0845606
TRINITY_DN4107_c1_g1_i1	234	30	0.0274656
TRINITY_DN133049_c0_g1_i1	306	69	0.0324239
TRINITY_DN1908_c5_g2_i1	263	81	0.0754532
TRINITY_DN40123_c0_g1_i1	294	81	0.0714141
TRINITY_DN15585_c0_g2_i1	257	48	0.0424892
TRINITY_DN128147_c0_g1_i1	230	6	0.0295142
TRINITY_DN6748_c0_g1_i1	446	45	0.00348244
TRINITY_DN35221_c0_g1_i1	494	99	0.00459195
TRINITY_DN13891_c1_g1_i1	549	90	0.00336658
TRINITY_DN57187_c0_g1_i1	277	39	0.0211802
TRINITY_DN68168_c0_g1_i1	461	90	0.00905179
TRINITY_DN88196_c0_g1_i1	406	99	0.022498
TRINITY_DN2090_c5_g1_i1	211	48	0.0464786
TRINITY_DN70628_c0_g1_i1	270	93	0.0635602
TRINITY_DN54745_c0_g1_i1	520	75	0.00322227
TRINITY_DN74773_c0_g1_i1	262	48	0.0349864
TRINITY_DN69871_c0_g1_i1	555	84	0.00180659
TRINITY_DN12161_c0_g2_i1	308	66	0.0303582
TRINITY_DN90446_c0_g1_i1	268	60	0.0278135
TRINITY_DN41906_c0_g1_i1	472	30	0.00199297
TRINITY_DN128290_c0_g1_i1	446	72	0.0044288
TRINITY_DN63582_c0_g1_i1	566	99	0.00276456
TRINITY_DN74563_c0_g1_i1	355	45	0.0107171
TRINITY_DN81962_c0_g1_i1	208	0	1.08964e-08
TRINITY_DN6183_c0_g1_i16	268	60	0.0286709
TRINITY_DN18484_c1_g1_i1	385	51	0.00674611
TRINITY_DN47989_c0_g1_i1	259	57	0.0261328
TRINITY_DN121703_c0_g1_i1	270	66	0.0307102
TRINITY_DN78998_c0_g1_i1	216	18	0.0287712
TRINITY_DN89979_c0_g1_i1	518	90	0.00422488
TRINITY_DN21528_c1_g1_i1	411	84	0.0177148
TRINITY_DN22530_c0_g1_i2	275	75	0.0439541
TRINITY_DN34860_c0_g1_i1	229	36	0.0364877
TRINITY_DN76147_c1_g1_i1	254	78	0.0665288
TRINITY_DN16626_c1_g1_i1	203	18	0.0288689
TRINITY_DN36798_c0_g1_i1	297	51	0.020035
TRINITY_DN12138_c0_g1_i3	289	93	0.0693485
TRINITY_DN47779_c0_g1_i1	361	84	0.0171015
TRINITY_DN110512_c0_g1_i1	358	99	0.0316639
TRINITY_DN101469_c0_g1_i1	430	60	0.0072662
TRINITY_DN78788_c0_g1_i1	321	78	0.0291529
TRINITY_DN19566_c0_g1_i2	232	93	0.154296
TRINITY_DN2718_c13_g1_i1	463	63	0.00419004
TRINITY_DN121497_c0_g1_i1	276	57	0.0255462
TRINITY_DN132478_c0_g1_i1	261	66	0.0482056
TRINITY_DN10337_c1_g1_i1	226	18	0.0253182
TRINITY_DN103966_c0_g1_i1	352	36	0.00900758
TRINITY_DN116595_c0_g1_i1	242	51	0.064938
TRINITY_DN114947_c0_g1_i1	208	84	0.140513
TRINITY_DN282_c4_g1_i1	259	57	0.0435702
TRINITY_DN123994_c0_g1_i1	957	93	1.24379e-05
TRINITY_DN7339_c0_g1_i1	402	87	0.0144511
TRINITY_DN15106_c0_g2_i1	293	90	0.0729233
TRINITY_DN93101_c0_g1_i1	357	6	0.00468069
TRINITY_DN8986_c0_g1_i4	271	78	0.070212
TRINITY_DN71429_c0_g1_i1	313	96	0.0587456
TRINITY_DN11908_c0_g1_i1	245	99	0.123067
TRINITY_DN9598_c0_g1_i13	878	93	5.81255e-05
TRINITY_DN95039_c0_g1_i1	218	93	0.163376
TRINITY_DN5893_c2_g1_i1	935	87	1.98427e-05
TRINITY_DN77508_c0_g1_i1	221	87	0.107214
TRINITY_DN978_c1_g2_i3	301	48	0.0170946
TRINITY_DN86555_c0_g1_i1	363	75	0.0139496
TRINITY_DN97536_c0_g1_i1	366	27	0.00569275
TRINITY_DN30299_c0_g1_i1	750	78	0.00015411
TRINITY_DN123784_c0_g1_i1	316	75	0.0248952
TRINITY_DN2875_c7_g1_i1	465	90	0.00482394
TRINITY_DN577_c1_g1_i1	219	45	0.0497782
TRINITY_DN2748_c3_g1_i1	266	63	0.0293853
TRINITY_DN4478_c1_g1_i2	219	84	0.10544
TRINITY_DN13202_c1_g1_i1	369	99	0.0343753
TRINITY_DN35308_c0_g1_i1	339	72	0.0188386
TRINITY_DN80266_c0_g1_i1	219	90	0.146652
TRINITY_DN106831_c0_g1_i1	525	90	0.00307711
TRINITY_DN66317_c0_g1_i1	226	51	0.0364571
TRINITY_DN62735_c0_g1_i1	678	78	0.000450831
TRINITY_DN73716_c0_g1_i1	616	87	0.000935604
TRINITY_DN97326_c0_g1_i1	396	57	0.00610414
TRINITY_DN95392_c0_g1_i1	494	72	0.00245725
TRINITY_DN35871_c0_g1_i1	336	54	0.0120347
TRINITY_DN46852_c0_g1_i1	406	78	0.00834346
TRINITY_DN47151_c0_g1_i2	386	54	0.00570004
TRINITY_DN112593_c0_g1_i1	361	48	0.010437
TRINITY_DN2538_c3_g1_i1	363	96	0.0232104
TRINITY_DN4042_c4_g1_i1	371	87	0.0215982
TRINITY_DN13136_c0_g1_i1	676	81	0.000522418
TRINITY_DN20535_c0_g1_i1	209	0	1.07611e-08
TRINITY_DN91037_c0_g1_i1	313	69	0.0300888
TRINITY_DN31516_c0_g1_i1	380	78	0.0119253
TRINITY_DN44145_c0_g1_i1	285	33	0.0205161
TRINITY_DN40563_c0_g1_i1	295	57	0.0164784
TRINITY_DN62525_c0_g1_i1	683	66	0.000173831
TRINITY_DN75154_c0_g1_i1	378	39	0.00612839
TRINITY_DN28262_c0_g1_i1	337	93	0.0334718
TRINITY_DN86135_c0_g1_i1	553	36	0.000698835
TRINITY_DN24680_c0_g1_i1	263	93	0.116664
TRINITY_DN48290_c0_g1_i1	379	96	0.0181569
TRINITY_DN59271_c0_g1_i1	353	96	0.0469701
TRINITY_DN8635_c0_g1_i3	202	30	0.0660224
TRINITY_DN5073_c0_g1_i5	438	93	0.00972206
TRINITY_DN12925_c0_g1_i4	1202	90	7.40253e-07
TRINITY_DN122298_c0_g1_i1	439	75	0.00965616
TRINITY_DN734_c1_g1_i4	473	78	0.0040281
TRINITY_DN106411_c0_g1_i1	486	90	0.0048828
TRINITY_DN133279_c0_g1_i1	301	87	0.0497715
TRINITY_DN40353_c0_g1_i1	283	63	0.0324002
TRINITY_DN108349_c0_g1_i1	513	48	0.00224798
TRINITY_DN15423_c0_g1_i1	702	96	0.000287709
TRINITY_DN115748_c0_g1_i1	279	54	0.0303167
TRINITY_DN60381_c0_g1_i1	482	60	0.00201821
TRINITY_DN128377_c0_g1_i1	334	78	0.0299808
TRINITY_DN126729_c0_g1_i1	788	72	9.77054e-05
TRINITY_DN37389_c0_g1_i1	470	45	0.0027678
TRINITY_DN111103_c0_g1_i1	229	57	0.0700663
TRINITY_DN68398_c0_g1_i1	397	51	0.00753711
TRINITY_DN89000_c0_g1_i1	382	39	0.00667765
TRINITY_DN131131_c0_g1_i1	403	78	0.00781833
TRINITY_DN78309_c0_g1_i1	204	33	0.0481157
TRINITY_DN39886_c0_g1_i1	216	45	0.0456829
TRINITY_DN133069_c0_g1_i1	210	81	0.161194
TRINITY_DN104557_c0_g1_i1	291	0	3.86465e-09
TRINITY_DN99971_c0_g1_i2	307	87	0.0648986
TRINITY_DN36109_c0_g1_i1	210	42	0.037047
TRINITY_DN119683_c0_g1_i1	595	96	0.00184674
TRINITY_DN18680_c0_g2_i1	309	93	0.0695735
TRINITY_DN56137_c0_g1_i1	219	78	0.0772367
TRINITY_DN67118_c0_g1_i1	294	72	0.0377467
TRINITY_DN87146_c0_g1_i1	420	33	0.00321821
TRINITY_DN98127_c0_g1_i1	276	57	0.0314355
TRINITY_DN10743_c0_g2_i1	203	12	0.0349571
TRINITY_DN3339_c3_g1_i1	429	87	0.00994719
TRINITY_DN108492_c0_g1_i1	623	87	0.000810453
TRINITY_DN14425_c2_g1_i1	432	93	0.0163984
TRINITY_DN29063_c0_g1_i1	820	90	6.78238e-05
TRINITY_DN284_c1_g4_i1	247	78	0.051478
TRINITY_DN58424_c0_g1_i1	237	18	0.0273662
TRINITY_DN112114_c0_g1_i1	584	66	0.000902115
TRINITY_DN10272_c4_g1_i1	255	99	0.106059
TRINITY_DN107212_c0_g1_i1	412	81	0.00867937
TRINITY_DN983_c0_g2_i1	578	93	0.00171336
TRINITY_DN50973_c0_g1_i1	239	0	7.39852e-09
TRINITY_DN7059_c6_g1_i1	594	99	0.0018556
TRINITY_DN127240_c0_g1_i1	306	42	0.0107848
TRINITY_DN16224_c0_g1_i1	317	48	0.0161791
TRINITY_DN36252_c0_g1_i1	280	39	0.0164333
TRINITY_DN12235_c0_g1_i33	385	96	0.0142282
TRINITY_DN77948_c0_g1_i1	425	93	0.0116885
TRINITY_DN107002_c0_g1_i1	684	93	0.000488542
TRINITY_DN127030_c0_g1_i1	407	60	0.00895939
TRINITY_DN4286_c0_g1_i2	508	87	0.00488437
TRINITY_DN33810_c0_g1_i1	295	78	0.0450804
TRINITY_DN24623_c1_g1_i1	273	75	0.0720677
TRINITY_DN117973_c0_g1_i2	716	66	0.000238167
TRINITY_DN91687_c0_g1_i1	360	78	0.0207524
TRINITY_DN75800_c0_g1_i1	467	78	0.00494812
TRINITY_DN77738_c0_g1_i1	300	87	0.0554974
TRINITY_DN86785_c0_g1_i1	290	51	0.0308841
TRINITY_DN97766_c0_g1_i1	245	39	0.0290777
TRINITY_DN1136_c1_g1_i1	202	48	0.0798867
TRINITY_DN105148_c0_g1_i1	344	33	0.0115165
TRINITY_DN60468_c0_g1_i1	421	90	0.00962451
TRINITY_DN133925_c0_g1_i1	260	99	0.114632
TRINITY_DN71449_c0_g1_i1	433	15	0.00275931
TRINITY_DN109293_c0_g1_i1	459	78	0.00835665
TRINITY_DN31956_c0_g1_i1	356	60	0.0115689
TRINITY_DN17623_c0_g2_i1	463	99	0.0100974
TRINITY_DN86575_c0_g1_i1	249	51	0.035976
TRINITY_DN84927_c0_g1_i1	247	69	0.0497694
TRINITY_DN82993_c0_g1_i1	396	66	0.0097797
TRINITY_DN93974_c0_g1_i1	299	18	0.0129317
TRINITY_DN45733_c0_g1_i2	272	96	0.103969
TRINITY_DN102706_c0_g1_i1	253	51	0.0275929
TRINITY_DN8796_c0_g1_i4	205	0	1.13123e-08
TRINITY_DN122734_c0_g1_i1	205	54	0.0563891
TRINITY_DN60258_c0_g1_i1	293	69	0.0367874
TRINITY_DN133715_c0_g1_i1	309	63	0.0180937
TRINITY_DN2889_c0_g2_i1	617	96	0.00134181
TRINITY_DN131781_c0_g1_i1	650	93	0.000939894
TRINITY_DN80286_c0_g1_i1	732	57	0.000101961
TRINITY_DN109083_c0_g1_i1	735	99	0.000333869
TRINITY_DN31746_c0_g1_i1	342	90	0.0303211
TRINITY_DN42727_c0_g1_i1	544	0	1.64021e-10
TRINITY_DN17296_c3_g1_i1	214	45	0.0597693
TRINITY_DN35891_c0_g1_i1	269	24	0.0164952
TRINITY_DN57853_c0_g1_i1	466	51	0.00273755
TRINITY_DN111543_c0_g1_i1	435	84	0.00703591
TRINITY_DN122524_c0_g1_i1	482	69	0.00288613
TRINITY_DN120590_c0_g1_i1	867	90	7.02096e-05
TRINITY_DN76811_c0_g1_i1	229	75	0.0572021
TRINITY_DN131571_c0_g1_i1	417	66	0.00900208
TRINITY_DN9183_c0_g1_i9	756	90	0.000155763
TRINITY_DN21152_c0_g1_i6	358	93	0.0212265
TRINITY_DN2339_c0_g1_i63	1557	96	7.05463e-09
TRINITY_DN115978_c0_g1_i1	447	54	0.00362987
TRINITY_DN74104_c0_g1_i1	314	78	0.0286383
TRINITY_DN17447_c1_g1_i1	419	66	0.00664445
TRINITY_DN34611_c0_g1_i1	206	81	0.118885
TRINITY_DN19393_c1_g1_i5	252	72	0.0470331
TRINITY_DN3554_c12_g1_i1	222	78	0.084167
TRINITY_DN76601_c0_g1_i1	292	72	0.0533125
TRINITY_DN89230_c0_g1_i1	312	87	0.050005
TRINITY_DN131361_c0_g1_i1	232	57	0.0596464
TRINITY_DN104787_c0_g1_i1	607	90	0.00155054
TRINITY_DN14381_c0_g3_i1	322	93	0.0327259
TRINITY_DN115768_c0_g1_i1	286	39	0.0218988
TRINITY_DN23420_c0_g1_i1	536	96	0.00459268
TRINITY_DN21497_c0_g1_i2	557	69	0.00103509
TRINITY_DN22703_c1_g1_i2	313	45	0.02572
TRINITY_DN9650_c1_g1_i2	479	87	0.00603699
TRINITY_DN54719_c0_g1_i1	255	36	0.0242994
TRINITY_DN67348_c0_g1_i1	499	72	0.00204581
TRINITY_DN78329_c0_g1_i1	335	90	0.0279337
TRINITY_DN18808_c0_g1_i1	302	48	0.0195531
TRINITY_DN85728_c0_g1_i1	751	54	7.57429e-05
TRINITY_DN38836_c0_g1_i1	328	75	0.0176577
TRINITY_DN132019_c0_g1_i1	325	87	0.0350152
TRINITY_DN10220_c2_g1_i1	562	66	0.00169605
TRINITY_DN104577_c0_g1_i1	407	99	0.0217549
TRINITY_DN58864_c0_g1_i1	256	69	0.0481902
TRINITY_DN6206_c0_g4_i1	259	21	0.0282181
TRINITY_DN127117_c0_g1_i1	292	36	0.0151475
TRINITY_DN21954_c0_g2_i1	332	81	0.0297716
TRINITY_DN23210_c0_g1_i1	217	84	0.109305
TRINITY_DN4368_c0_g1_i1	227	30	0.0188529
TRINITY_DN123535_c0_g1_i1	472	60	0.00214127
TRINITY_DN0_c1_g1_i10	325	72	0.0311466
TRINITY_DN134516_c0_g1_i1	254	33	0.0266945
TRINITY_DN25148_c0_g1_i1	521	30	0.000544025
TRINITY_DN90130_c0_g1_i1	305	33	0.0207897
TRINITY_DN36129_c0_g1_i1	327	66	0.0327617
TRINITY_DN92068_c0_g1_i1	206	63	0.0776775
TRINITY_DN43870_c1_g1_i1	269	93	0.0662407
TRINITY_DN32547_c0_g1_i1	418	69	0.0116352
TRINITY_DN107652_c0_g1_i1	345	69	0.0189141
TRINITY_DN54509_c0_g1_i1	437	42	0.00279528
TRINITY_DN63556_c0_g1_i1	430	69	0.00619331
TRINITY_DN76185_c0_g1_i1	202	60	0.0852057
TRINITY_DN27645_c0_g1_i1	309	57	0.0241682
TRINITY_DN38626_c0_g1_i1	314	75	0.0261589
TRINITY_DN11478_c0_g1_i9	301	42	0.0194169
TRINITY_DN3001_c0_g1_i14	238	0	7.4915e-09
TRINITY_DN1542_c0_g2_i1	465	63	0.00337893
TRINITY_DN112344_c0_g1_i1	265	9	0.0206222
TRINITY_DN89663_c0_g1_i1	493	57	0.00325874
TRINITY_DN107442_c0_g1_i1	325	78	0.0439177
TRINITY_DN118423_c0_g1_i1	245	93	0.119239
TRINITY_DN606_c3_g1_i1	546	57	0.00151118
TRINITY_DN52365_c0_g1_i1	210	30	0.0491211
TRINITY_DN83374_c0_g1_i1	613	81	0.00124706
TRINITY_DN58444_c0_g1_i1	381	42	0.00628705
TRINITY_DN67491_c0_g1_i1	487	63	0.00298819
TRINITY_DN101153_c0_g1_i1	261	54	0.0372645
TRINITY_DN78472_c0_g1_i1	485	51	0.00322993
TRINITY_DN123115_c0_g1_i1	355	0	1.73776e-09
TRINITY_DN3220_c1_g1_i1	341	15	0.00596701
TRINITY_DN21146_c0_g1_i1	463	96	0.0109615
TRINITY_DN107232_c0_g1_i1	395	90	0.0131755
TRINITY_DN30193_c0_g1_i1	495	72	0.0030601
TRINITY_DN103650_c0_g1_i1	797	84	0.000111905
TRINITY_DN41174_c0_g1_i1	229	63	0.0717073
TRINITY_DN127260_c0_g1_i1	468	72	0.00414944
TRINITY_DN16244_c0_g1_i1	707	63	0.000174671
TRINITY_DN105588_c0_g1_i1	784	78	8.07662e-05
TRINITY_DN36272_c0_g1_i1	385	99	0.0237486
TRINITY_DN91913_c0_g1_i1	374	48	0.0119987
TRINITY_DN20086_c0_g1_i4	203	9	0.0304865
TRINITY_DN68149_c0_g1_i1	283	75	0.0337969
TRINITY_DN19951_c1_g1_i1	276	78	0.0546924
TRINITY_DN127050_c0_g1_i1	225	69	0.0837389
TRINITY_DN102762_c0_g2_i1	214	81	0.15169
TRINITY_DN11653_c3_g1_i1	225	72	0.116724
TRINITY_DN678_c5_g1_i1	376	78	0.0171879
TRINITY_DN22755_c0_g2_i1	456	39	0.00162864
TRINITY_DN24011_c0_g1_i1	226	72	0.0792948
TRINITY_DN2937_c0_g1_i1	320	87	0.0392276
TRINITY_DN2135_c1_g2_i3	316	57	0.0197815
TRINITY_DN66001_c0_g1_i1	399	36	0.0058357
TRINITY_DN19741_c1_g1_i1	222	99	0.124574
TRINITY_DN97010_c0_g1_i1	226	96	0.105071
TRINITY_DN63350_c1_g1_i2	380	78	0.0138969
TRINITY_DN130098_c0_g1_i1	238	30	0.0280601
TRINITY_DN39427_c0_g1_i1	489	81	0.00422049
TRINITY_DN14202_c0_g1_i8	1769	63	3.12383e-10
TRINITY_DN122964_c0_g1_i1	283	75	0.0430993
TRINITY_DN4231_c1_g1_i1	647	90	0.000898043
TRINITY_DN20851_c1_g1_i1	237	33	0.0358972
TRINITY_DN108243_c0_g1_i1	433	72	0.0089341
TRINITY_DN119224_c0_g1_i1	916	84	2.59796e-05
TRINITY_DN93994_c0_g1_i1	333	99	0.0624515
TRINITY_DN19391_c2_g1_i1	272	78	0.050893
TRINITY_DN48264_c0_g1_i1	236	60	0.0540446
TRINITY_DN92924_c0_g1_i1	389	90	0.0292373
TRINITY_DN2815_c0_g1_i5	421	87	0.0124461
TRINITY_DN90217_c0_g1_i1	428	63	0.0044401
TRINITY_DN117080_c0_g1_i1	240	96	0.0934488
TRINITY_DN128061_c0_g1_i1	319	78	0.0283461
TRINITY_DN5313_c0_g1_i2	553	18	0.000714024
TRINITY_DN8583_c5_g1_i1	221	0	9.26344e-09
TRINITY_DN37073_c0_g1_i1	218	0	9.61709e-09
TRINITY_DN8456_c1_g1_i1	653	63	0.000484642
TRINITY_DN56803_c0_g1_i1	719	66	0.00012699
TRINITY_DN78769_c0_g1_i1	320	84	0.0354137
TRINITY_DN11388_c1_g1_i1	231	39	0.0393462
TRINITY_DN115998_c0_g1_i1	416	75	0.00713792
TRINITY_DN12390_c0_g1_i2	262	90	0.0678183
TRINITY_DN114928_c0_g1_i1	370	63	0.0119026
TRINITY_DN125909_c0_g1_i1	453	93	0.0101834
TRINITY_DN34631_c0_g1_i1	455	60	0.00422085
TRINITY_DN11952_c1_g1_i2	270	99	0.0857849
TRINITY_DN54949_c0_g1_i1	445	87	0.0116781
TRINITY_DN29635_c0_g2_i1	232	63	0.0635355
TRINITY_DN130311_c0_g1_i1	379	78	0.0108334
TRINITY_DN74977_c0_g1_i1	523	51	0.00120537
TRINITY_DN96939_c0_g1_i1	331	9	0.00916509
TRINITY_DN10811_c0_g1_i1	274	90	0.0522709
TRINITY_DN81313_c0_g1_i1	279	57	0.0409851
TRINITY_DN123765_c0_g1_i1	338	90	0.0265235
TRINITY_DN12749_c0_g1_i1	276	90	0.0957927
TRINITY_DN90360_c0_g1_i1	696	45	0.000102413
TRINITY_DN14253_c1_g1_i1	311	63	0.0210787
TRINITY_DN5195_c0_g1_i6	209	96	0.159631
TRINITY_DN129844_c0_g1_i1	511	72	0.00278861
TRINITY_DN87396_c0_g1_i1	297	84	0.0525805
TRINITY_DN27875_c0_g1_i1	352	78	0.0230763
TRINITY_DN58884_c0_g1_i1	294	66	0.0293251
TRINITY_DN69865_c0_g1_i1	1191	84	6.88133e-07
TRINITY_DN103527_c0_g1_i1	793	78	6.26899e-05
TRINITY_DN10601_c0_g1_i1	1089	99	4.07327e-06
TRINITY_DN89893_c0_g1_i1	234	51	0.0451205
TRINITY_DN123555_c0_g1_i1	291	45	0.0164178
TRINITY_DN2090_c0_g2_i7	405	87	0.013383
TRINITY_DN134536_c0_g1_i1	207	66	0.0782427
TRINITY_DN88823_c0_g1_i1	269	30	0.0228675
TRINITY_DN99804_c0_g1_i1	1376	99	8.85085e-08
TRINITY_DN5454_c2_g1_i1	365	99	0.0323864
TRINITY_DN52595_c0_g1_i1	317	78	0.0367329
TRINITY_DN9789_c0_g2_i1	460	75	0.00348158
TRINITY_DN10796_c0_g2_i3	248	30	0.0256545
TRINITY_DN12052_c0_g1_i3	270	27	0.0202958
TRINITY_DN4376_c0_g6_i1	478	24	0.0010772
TRINITY_DN58674_c0_g1_i1	333	63	0.0199677
TRINITY_DN93515_c0_g1_i1	210	75	0.0990092
TRINITY_DN57604_c0_g1_i1	472	57	0.00323075
TRINITY_DN112364_c0_g1_i1	317	72	0.0311899
TRINITY_DN130744_c0_g1_i1	549	93	0.00322742
TRINITY_DN103880_c0_g1_i1	810	87	8.51124e-05
TRINITY_DN114861_c0_g1_i1	278	84	0.0724261
TRINITY_DN52385_c0_g1_i1	444	99	0.00804008
TRINITY_DN7253_c0_g1_i1	572	57	0.000886182
TRINITY_DN13191_c0_g1_i2	399	36	0.00355083
TRINITY_DN15404_c0_g1_i1	536	60	0.0010194
TRINITY_DN7885_c1_g1_i1	314	69	0.0303927
TRINITY_DN24172_c0_g1_i2	613	72	0.00102627
TRINITY_DN71343_c0_g1_i1	278	90	0.0638675
TRINITY_DN46413_c0_g1_i1	248	18	0.0230041
TRINITY_DN101173_c0_g1_i1	479	72	0.00331971
TRINITY_DN66441_c0_g1_i1	206	69	0.128151
TRINITY_DN132182_c0_g1_i1	632	93	0.00136326
TRINITY_DN88403_c0_g1_i1	759	99	0.000240904
[truncated: 63,469 more rows]

## Sheet: Table S2
lncRNA ID			mRNA ID
TRINITY_DN8_c0_g2_i1	.	+	TRINITY_DN8_c0_g2_i1	0	943	ID=TRINITY_DN8_c0_g2_i1.p1;TRINITY_DN8_c0_g2~~TRINITY_DN8_c0_g2_i1.p1;ORF_type:complete_(-),score=19.14	0	-	296	599	0	1	943	0	No
TRINITY_DN28_c0_g1_i1	.	+	TRINITY_DN282_c0_g1_i19	0	563	ID=TRINITY_DN282_c0_g1_i19.p1;TRINITY_DN282_c0_g1~~TRINITY_DN282_c0_g1_i19.p1;ORF_type:5prime_partial_(-),score=25.73	0	-	70	562	0	1	563	0	No
TRINITY_DN28_c0_g1_i1	.	+	TRINITY_DN282_c0_g1_i15	0	1255	ID=TRINITY_DN282_c0_g1_i15.p1;TRINITY_DN282_c0_g1~~TRINITY_DN282_c0_g1_i15.p1;ORF_type:5prime_partial_(-),score=26.01	0	-	837	1254	0	1	1255	0	No
TRINITY_DN28_c0_g1_i1	.	+	TRINITY_DN282_c0_g1_i21	0	563	ID=TRINITY_DN282_c0_g1_i21.p1;TRINITY_DN282_c0_g1~~TRINITY_DN282_c0_g1_i21.p1;ORF_type:5prime_partial_(-),score=28.01	0	-	70	562	0	1	563	0	No
TRINITY_DN28_c0_g1_i1	.	+	TRINITY_DN282_c0_g1_i20	0	1520	ID=TRINITY_DN282_c0_g1_i20.p1;TRINITY_DN282_c0_g1~~TRINITY_DN282_c0_g1_i20.p1;ORF_type:complete_(+),score=11.28	0	+	783	1098	0	1	1520	0	No
TRINITY_DN28_c0_g1_i1	.	-	TRINITY_DN10357_c1_g1_i1	0	600	ID=TRINITY_DN10357_c1_g1_i1.p1;TRINITY_DN10357_c1_g1~~TRINITY_DN10357_c1_g1_i1.p1;ORF_type:5prime_partial_(-),score=8.08	0	-	102	600	0	1	600	0	No
TRINITY_DN28_c0_g1_i2	.	+	TRINITY_DN282_c0_g1_i6	0	974	ID=TRINITY_DN282_c0_g1_i6.p1;TRINITY_DN282_c0_g1~~TRINITY_DN282_c0_g1_i6.p1;ORF_type:complete_(-),score=36.00	0	-	331	904	0	1	974	0	No
TRINITY_DN28_c0_g1_i2	.	+	TRINITY_DN282_c0_g1_i9	0	1987	ID=TRINITY_DN282_c0_g1_i9.p1;TRINITY_DN282_c0_g1~~TRINITY_DN282_c0_g1_i9.p1;ORF_type:complete_(-),score=69.48	0	-	1131	1917	0	1	1987	0	No
TRINITY_DN28_c0_g1_i2	.	+	TRINITY_DN282_c0_g1_i12	0	1360	ID=TRINITY_DN282_c0_g1_i12.p1;TRINITY_DN282_c0_g1~~TRINITY_DN282_c0_g1_i12.p1;ORF_type:complete_(-),score=65.65	0	-	504	1290	0	1	1360	0	No
TRINITY_DN28_c0_g1_i2	.	+	TRINITY_DN282_c0_g1_i19	0	563	ID=TRINITY_DN282_c0_g1_i19.p1;TRINITY_DN282_c0_g1~~TRINITY_DN282_c0_g1_i19.p1;ORF_type:5prime_partial_(-),score=25.73	0	-	70	562	0	1	563	0	No
TRINITY_DN28_c0_g1_i2	.	+	TRINITY_DN282_c0_g1_i15	0	1255	ID=TRINITY_DN282_c0_g1_i15.p1;TRINITY_DN282_c0_g1~~TRINITY_DN282_c0_g1_i15.p1;ORF_type:5prime_partial_(-),score=26.01	0	-	837	1254	0	1	1255	0	No
TRINITY_DN28_c0_g1_i2	.	+	TRINITY_DN282_c0_g1_i21	0	563	ID=TRINITY_DN282_c0_g1_i21.p1;TRINITY_DN282_c0_g1~~TRINITY_DN282_c0_g1_i21.p1;ORF_type:5prime_partial_(-),score=28.01	0	-	70	562	0	1	563	0	No
TRINITY_DN28_c0_g1_i2	.	-	TRINITY_DN6162_c0_g1_i4	0	320	ID=TRINITY_DN6162_c0_g1_i4.p1;TRINITY_DN6162_c0_g1~~TRINITY_DN6162_c0_g1_i4.p1;ORF_type:internal_(+),score=14.42	0	+	2	320	0	1	320	0	No
TRINITY_DN28_c0_g1_i2	.	+	TRINITY_DN282_c0_g1_i20	0	1520	ID=TRINITY_DN282_c0_g1_i20.p1;TRINITY_DN282_c0_g1~~TRINITY_DN282_c0_g1_i20.p1;ORF_type:complete_(+),score=11.28	0	+	783	1098	0	1	1520	0	No
TRINITY_DN28_c0_g1_i2	.	+	TRINITY_DN282_c0_g1_i20	0	1520	ID=TRINITY_DN282_c0_g1_i20.p1;TRINITY_DN282_c0_g1~~TRINITY_DN282_c0_g1_i20.p1;ORF_type:complete_(+),score=11.28	0	+	783	1098	0	1	1520	0	No
TRINITY_DN28_c0_g1_i2	.	+	TRINITY_DN1425_c0_g1_i65	0	6687	ID=TRINITY_DN1425_c0_g1_i65.p1;TRINITY_DN1425_c0_g1~~TRINITY_DN1425_c0_g1_i65.p1;ORF_type:complete_(-),score=350.07	0	-	2721	6507	0	1	6687	0	No
TRINITY_DN28_c0_g1_i2	.	+	TRINITY_DN1425_c0_g1_i65	0	6687	ID=TRINITY_DN1425_c0_g1_i65.p3;TRINITY_DN1425_c0_g1~~TRINITY_DN1425_c0_g1_i65.p3;ORF_type:complete_(-),score=6.34	0	-	744	1146	0	1	6687	0	No
TRINITY_DN28_c0_g1_i2	.	+	TRINITY_DN1425_c0_g1_i47	0	5464	ID=TRINITY_DN1425_c0_g1_i47.p1;TRINITY_DN1425_c0_g1~~TRINITY_DN1425_c0_g1_i47.p1;ORF_type:complete_(-),score=371.40	0	-	1088	5144	0	1	5464	0	No
TRINITY_DN28_c0_g1_i2	.	+	TRINITY_DN1425_c0_g1_i44	0	5476	ID=TRINITY_DN1425_c0_g1_i44.p1;TRINITY_DN1425_c0_g1~~TRINITY_DN1425_c0_g1_i44.p1;ORF_type:complete_(-),score=372.31	0	-	1088	5156	0	1	5476	0	No
TRINITY_DN28_c0_g1_i2	.	+	TRINITY_DN1425_c0_g1_i4	0	4874	ID=TRINITY_DN1425_c0_g1_i4.p1;TRINITY_DN1425_c0_g1~~TRINITY_DN1425_c0_g1_i4.p1;ORF_type:complete_(-),score=344.25	0	-	1088	4346	0	1	4874	0	No
TRINITY_DN28_c0_g1_i2	.	+	TRINITY_DN1425_c0_g1_i171	0	7000	ID=TRINITY_DN1425_c0_g1_i171.p3;TRINITY_DN1425_c0_g1~~TRINITY_DN1425_c0_g1_i171.p3;ORF_type:complete_(-),score=6.34	0	-	744	1146	0	1	7000	0	No
TRINITY_DN28_c0_g1_i2	.	+	TRINITY_DN1425_c0_g1_i171	0	7000	ID=TRINITY_DN1425_c0_g1_i171.p1;TRINITY_DN1425_c0_g1~~TRINITY_DN1425_c0_g1_i171.p1;ORF_type:complete_(-),score=350.07	0	-	3034	6820	0	1	7000	0	No
TRINITY_DN28_c0_g1_i2	.	+	TRINITY_DN1425_c0_g1_i168	0	5620	ID=TRINITY_DN1425_c0_g1_i168.p1;TRINITY_DN1425_c0_g1~~TRINITY_DN1425_c0_g1_i168.p1;ORF_type:complete_(-),score=346.18	0	-	1088	4892	0	1	5620	0	No
TRINITY_DN28_c0_g1_i2	.	+	TRINITY_DN1425_c0_g1_i168	0	5620	ID=TRINITY_DN1425_c0_g1_i168.p4;TRINITY_DN1425_c0_g1~~TRINITY_DN1425_c0_g1_i168.p4;ORF_type:complete_(-),score=29.52	0	-	4907	5300	0	1	5620	0	No
TRINITY_DN28_c0_g1_i2	.	+	TRINITY_DN1425_c0_g1_i135	0	5494	ID=TRINITY_DN1425_c0_g1_i135.p1;TRINITY_DN1425_c0_g1~~TRINITY_DN1425_c0_g1_i135.p1;ORF_type:complete_(-),score=374.07	0	-	1088	5174	0	1	5494	0	No
TRINITY_DN28_c0_g1_i2	.	+	TRINITY_DN1425_c0_g1_i100	0	5339	ID=TRINITY_DN1425_c0_g1_i100.p1;TRINITY_DN1425_c0_g1~~TRINITY_DN1425_c0_g1_i100.p1;ORF_type:complete_(-),score=374.73	0	-	1088	5159	0	1	5339	0	No
TRINITY_DN28_c0_g1_i2	.	-	TRINITY_DN10357_c1_g1_i1	0	600	ID=TRINITY_DN10357_c1_g1_i1.p1;TRINITY_DN10357_c1_g1~~TRINITY_DN10357_c1_g1_i1.p1;ORF_type:5prime_partial_(-),score=8.08	0	-	102	600	0	1	600	0	No
TRINITY_DN28_c0_g1_i3	.	+	TRINITY_DN282_c0_g1_i6	0	974	ID=TRINITY_DN282_c0_g1_i6.p1;TRINITY_DN282_c0_g1~~TRINITY_DN282_c0_g1_i6.p1;ORF_type:complete_(-),score=36.00	0	-	331	904	0	1	974	0	No
TRINITY_DN28_c0_g1_i3	.	+	TRINITY_DN282_c0_g1_i9	0	1987	ID=TRINITY_DN282_c0_g1_i9.p1;TRINITY_DN282_c0_g1~~TRINITY_DN282_c0_g1_i9.p1;ORF_type:complete_(-),score=69.48	0	-	1131	1917	0	1	1987	0	No
TRINITY_DN28_c0_g1_i3	.	+	TRINITY_DN282_c0_g1_i12	0	1360	ID=TRINITY_DN282_c0_g1_i12.p1;TRINITY_DN282_c0_g1~~TRINITY_DN282_c0_g1_i12.p1;ORF_type:complete_(-),score=65.65	0	-	504	1290	0	1	1360	0	No
TRINITY_DN28_c0_g1_i4	.	-	TRINITY_DN6162_c0_g1_i4	0	320	ID=TRINITY_DN6162_c0_g1_i4.p1;TRINITY_DN6162_c0_g1~~TRINITY_DN6162_c0_g1_i4.p1;ORF_type:internal_(+),score=14.42	0	+	2	320	0	1	320	0	No
TRINITY_DN28_c0_g1_i4	.	+	TRINITY_DN282_c0_g1_i19	0	563	ID=TRINITY_DN282_c0_g1_i19.p1;TRINITY_DN282_c0_g1~~TRINITY_DN282_c0_g1_i19.p1;ORF_type:5prime_partial_(-),score=25.73	0	-	70	562	0	1	563	0	No
TRINITY_DN28_c0_g1_i4	.	+	TRINITY_DN282_c0_g1_i15	0	1255	ID=TRINITY_DN282_c0_g1_i15.p1;TRINITY_DN282_c0_g1~~TRINITY_DN282_c0_g1_i15.p1;ORF_type:5prime_partial_(-),score=26.01	0	-	837	1254	0	1	1255	0	No
TRINITY_DN28_c0_g1_i5	.	+	TRINITY_DN282_c0_g1_i6	0	974	ID=TRINITY_DN282_c0_g1_i6.p1;TRINITY_DN282_c0_g1~~TRINITY_DN282_c0_g1_i6.p1;ORF_type:complete_(-),score=36.00	0	-	331	904	0	1	974	0	No
TRINITY_DN28_c0_g1_i5	.	+	TRINITY_DN282_c0_g1_i9	0	1987	ID=TRINITY_DN282_c0_g1_i9.p1;TRINITY_DN282_c0_g1~~TRINITY_DN282_c0_g1_i9.p1;ORF_type:complete_(-),score=69.48	0	-	1131	1917	0	1	1987	0	No
TRINITY_DN28_c0_g1_i5	.	+	TRINITY_DN282_c0_g1_i12	0	1360	ID=TRINITY_DN282_c0_g1_i12.p1;TRINITY_DN282_c0_g1~~TRINITY_DN282_c0_g1_i12.p1;ORF_type:complete_(-),score=65.65	0	-	504	1290	0	1	1360	0	No
TRINITY_DN28_c0_g1_i5	.	+	TRINITY_DN1425_c0_g1_i65	0	6687	ID=TRINITY_DN1425_c0_g1_i65.p1;TRINITY_DN1425_c0_g1~~TRINITY_DN1425_c0_g1_i65.p1;ORF_type:complete_(-),score=350.07	0	-	2721	6507	0	1	6687	0	No
TRINITY_DN28_c0_g1_i5	.	+	TRINITY_DN1425_c0_g1_i65	0	6687	ID=TRINITY_DN1425_c0_g1_i65.p3;TRINITY_DN1425_c0_g1~~TRINITY_DN1425_c0_g1_i65.p3;ORF_type:complete_(-),score=6.34	0	-	744	1146	0	1	6687	0	No
TRINITY_DN28_c0_g1_i5	.	+	TRINITY_DN1425_c0_g1_i47	0	5464	ID=TRINITY_DN1425_c0_g1_i47.p1;TRINITY_DN1425_c0_g1~~TRINITY_DN1425_c0_g1_i47.p1;ORF_type:complete_(-),score=371.40	0	-	1088	5144	0	1	5464	0	No
TRINITY_DN28_c0_g1_i5	.	+	TRINITY_DN1425_c0_g1_i44	0	5476	ID=TRINITY_DN1425_c0_g1_i44.p1;TRINITY_DN1425_c0_g1~~TRINITY_DN1425_c0_g1_i44.p1;ORF_type:complete_(-),score=372.31	0	-	1088	5156	0	1	5476	0	No
TRINITY_DN28_c0_g1_i5	.	+	TRINITY_DN1425_c0_g1_i4	0	4874	ID=TRINITY_DN1425_c0_g1_i4.p1;TRINITY_DN1425_c0_g1~~TRINITY_DN1425_c0_g1_i4.p1;ORF_type:complete_(-),score=344.25	0	-	1088	4346	0	1	4874	0	No
TRINITY_DN28_c0_g1_i5	.	+	TRINITY_DN1425_c0_g1_i171	0	7000	ID=TRINITY_DN1425_c0_g1_i171.p3;TRINITY_DN1425_c0_g1~~TRINITY_DN1425_c0_g1_i171.p3;ORF_type:complete_(-),score=6.34	0	-	744	1146	0	1	7000	0	No
TRINITY_DN28_c0_g1_i5	.	+	TRINITY_DN1425_c0_g1_i171	0	7000	ID=TRINITY_DN1425_c0_g1_i171.p1;TRINITY_DN1425_c0_g1~~TRINITY_DN1425_c0_g1_i171.p1;ORF_type:complete_(-),score=350.07	0	-	3034	6820	0	1	7000	0	No
TRINITY_DN28_c0_g1_i5	.	+	TRINITY_DN1425_c0_g1_i168	0	5620	ID=TRINITY_DN1425_c0_g1_i168.p1;TRINITY_DN1425_c0_g1~~TRINITY_DN1425_c0_g1_i168.p1;ORF_type:complete_(-),score=346.18	0	-	1088	4892	0	1	5620	0	No
TRINITY_DN28_c0_g1_i5	.	+	TRINITY_DN1425_c0_g1_i168	0	5620	ID=TRINITY_DN1425_c0_g1_i168.p4;TRINITY_DN1425_c0_g1~~TRINITY_DN1425_c0_g1_i168.p4;ORF_type:complete_(-),score=29.52	0	-	4907	5300	0	1	5620	0	No
TRINITY_DN28_c0_g1_i5	.	+	TRINITY_DN1425_c0_g1_i135	0	5494	ID=TRINITY_DN1425_c0_g1_i135.p1;TRINITY_DN1425_c0_g1~~TRINITY_DN1425_c0_g1_i135.p1;ORF_type:complete_(-),score=374.07	0	-	1088	5174	0	1	5494	0	No
TRINITY_DN28_c0_g1_i5	.	+	TRINITY_DN1425_c0_g1_i100	0	5339	ID=TRINITY_DN1425_c0_g1_i100.p1;TRINITY_DN1425_c0_g1~~TRINITY_DN1425_c0_g1_i100.p1;ORF_type:complete_(-),score=374.73	0	-	1088	5159	0	1	5339	0	No
TRINITY_DN28_c0_g1_i5	.	+	TRINITY_DN282_c0_g1_i20	0	1520	ID=TRINITY_DN282_c0_g1_i20.p1;TRINITY_DN282_c0_g1~~TRINITY_DN282_c0_g1_i20.p1;ORF_type:complete_(+),score=11.28	0	+	783	1098	0	1	1520	0	No
TRINITY_DN28_c0_g1_i6	.	+	TRINITY_DN282_c0_g1_i6	0	974	ID=TRINITY_DN282_c0_g1_i6.p1;TRINITY_DN282_c0_g1~~TRINITY_DN282_c0_g1_i6.p1;ORF_type:complete_(-),score=36.00	0	-	331	904	0	1	974	0	No
TRINITY_DN28_c0_g1_i6	.	+	TRINITY_DN282_c0_g1_i9	0	1987	ID=TRINITY_DN282_c0_g1_i9.p1;TRINITY_DN282_c0_g1~~TRINITY_DN282_c0_g1_i9.p1;ORF_type:complete_(-),score=69.48	0	-	1131	1917	0	1	1987	0	No
TRINITY_DN28_c0_g1_i6	.	+	TRINITY_DN282_c0_g1_i12	0	1360	ID=TRINITY_DN282_c0_g1_i12.p1;TRINITY_DN282_c0_g1~~TRINITY_DN282_c0_g1_i12.p1;ORF_type:complete_(-),score=65.65	0	-	504	1290	0	1	1360	0	No
TRINITY_DN28_c0_g1_i7	.	+	TRINITY_DN1425_c0_g1_i65	0	6687	ID=TRINITY_DN1425_c0_g1_i65.p1;TRINITY_DN1425_c0_g1~~TRINITY_DN1425_c0_g1_i65.p1;ORF_type:complete_(-),score=350.07	0	-	2721	6507	0	1	6687	0	No
TRINITY_DN28_c0_g1_i7	.	+	TRINITY_DN1425_c0_g1_i65	0	6687	ID=TRINITY_DN1425_c0_g1_i65.p3;TRINITY_DN1425_c0_g1~~TRINITY_DN1425_c0_g1_i65.p3;ORF_type:complete_(-),score=6.34	0	-	744	1146	0	1	6687	0	No
TRINITY_DN28_c0_g1_i7	.	+	TRINITY_DN1425_c0_g1_i47	0	5464	ID=TRINITY_DN1425_c0_g1_i47.p1;TRINITY_DN1425_c0_g1~~TRINITY_DN1425_c0_g1_i47.p1;ORF_type:complete_(-),score=371.40	0	-	1088	5144	0	1	5464	0	No
TRINITY_DN28_c0_g1_i7	.	+	TRINITY_DN1425_c0_g1_i44	0	5476	ID=TRINITY_DN1425_c0_g1_i44.p1;TRINITY_DN1425_c0_g1~~TRINITY_DN1425_c0_g1_i44.p1;ORF_type:complete_(-),score=372.31	0	-	1088	5156	0	1	5476	0	No
TRINITY_DN28_c0_g1_i7	.	+	TRINITY_DN1425_c0_g1_i4	0	4874	ID=TRINITY_DN1425_c0_g1_i4.p1;TRINITY_DN1425_c0_g1~~TRINITY_DN1425_c0_g1_i4.p1;ORF_type:complete_(-),score=344.25	0	-	1088	4346	0	1	4874	0	No
TRINITY_DN28_c0_g1_i7	.	+	TRINITY_DN1425_c0_g1_i171	0	7000	ID=TRINITY_DN1425_c0_g1_i171.p3;TRINITY_DN1425_c0_g1~~TRINITY_DN1425_c0_g1_i171.p3;ORF_type:complete_(-),score=6.34	0	-	744	1146	0	1	7000	0	No
TRINITY_DN28_c0_g1_i7	.	+	TRINITY_DN1425_c0_g1_i171	0	7000	ID=TRINITY_DN1425_c0_g1_i171.p1;TRINITY_DN1425_c0_g1~~TRINITY_DN1425_c0_g1_i171.p1;ORF_type:complete_(-),score=350.07	0	-	3034	6820	0	1	7000	0	No
TRINITY_DN28_c0_g1_i7	.	+	TRINITY_DN1425_c0_g1_i168	0	5620	ID=TRINITY_DN1425_c0_g1_i168.p1;TRINITY_DN1425_c0_g1~~TRINITY_DN1425_c0_g1_i168.p1;ORF_type:complete_(-),score=346.18	0	-	1088	4892	0	1	5620	0	No
TRINITY_DN28_c0_g1_i7	.	+	TRINITY_DN1425_c0_g1_i168	0	5620	ID=TRINITY_DN1425_c0_g1_i168.p4;TRINITY_DN1425_c0_g1~~TRINITY_DN1425_c0_g1_i168.p4;ORF_type:complete_(-),score=29.52	0	-	4907	5300	0	1	5620	0	No
TRINITY_DN28_c0_g1_i7	.	+	TRINITY_DN1425_c0_g1_i135	0	5494	ID=TRINITY_DN1425_c0_g1_i135.p1;TRINITY_DN1425_c0_g1~~TRINITY_DN1425_c0_g1_i135.p1;ORF_type:complete_(-),score=374.07	0	-	1088	5174	0	1	5494	0	No
TRINITY_DN28_c0_g1_i7	.	+	TRINITY_DN1425_c0_g1_i100	0	5339	ID=TRINITY_DN1425_c0_g1_i100.p1;TRINITY_DN1425_c0_g1~~TRINITY_DN1425_c0_g1_i100.p1;ORF_type:complete_(-),score=374.73	0	-	1088	5159	0	1	5339	0	No
TRINITY_DN28_c0_g1_i7	.	+	TRINITY_DN282_c0_g1_i6	0	974	ID=TRINITY_DN282_c0_g1_i6.p1;TRINITY_DN282_c0_g1~~TRINITY_DN282_c0_g1_i6.p1;ORF_type:complete_(-),score=36.00	0	-	331	904	0	1	974	0	No
TRINITY_DN28_c0_g1_i7	.	+	TRINITY_DN282_c0_g1_i9	0	1987	ID=TRINITY_DN282_c0_g1_i9.p1;TRINITY_DN282_c0_g1~~TRINITY_DN282_c0_g1_i9.p1;ORF_type:complete_(-),score=69.48	0	-	1131	1917	0	1	1987	0	No
TRINITY_DN28_c0_g1_i7	.	+	TRINITY_DN282_c0_g1_i12	0	1360	ID=TRINITY_DN282_c0_g1_i12.p1;TRINITY_DN282_c0_g1~~TRINITY_DN282_c0_g1_i12.p1;ORF_type:complete_(-),score=65.65	0	-	504	1290	0	1	1360	0	No
TRINITY_DN28_c0_g1_i7	.	+	TRINITY_DN282_c0_g1_i20	0	1520	ID=TRINITY_DN282_c0_g1_i20.p1;TRINITY_DN282_c0_g1~~TRINITY_DN282_c0_g1_i20.p1;ORF_type:complete_(+),score=11.28	0	+	783	1098	0	1	1520	0	No
TRINITY_DN85_c1_g2_i1	.	+	TRINITY_DN199_c0_g1_i3	0	1730	ID=TRINITY_DN199_c0_g1_i3.p1;TRINITY_DN199_c0_g1~~TRINITY_DN199_c0_g1_i3.p1;ORF_type:complete_(-),score=96.27	0	-	297	1524	0	1	1730	0	No
TRINITY_DN85_c3_g1_i1	.	-	TRINITY_DN2747_c0_g1_i94	0	3997	ID=TRINITY_DN2747_c0_g1_i94.p1;TRINITY_DN2747_c0_g1~~TRINITY_DN2747_c0_g1_i94.p1;ORF_type:complete_(+),score=131.83	0	+	1319	3176	0	1	3997	0	No
TRINITY_DN85_c3_g1_i1	.	-	TRINITY_DN2747_c0_g1_i94	0	3997	ID=TRINITY_DN2747_c0_g1_i94.p3;TRINITY_DN2747_c0_g1~~TRINITY_DN2747_c0_g1_i94.p3;ORF_type:complete_(+),score=25.36	0	+	176	491	0	1	3997	0	No
TRINITY_DN85_c3_g1_i1	.	-	TRINITY_DN2747_c0_g1_i60	0	3262	ID=TRINITY_DN2747_c0_g1_i60.p1;TRINITY_DN2747_c0_g1~~TRINITY_DN2747_c0_g1_i60.p1;ORF_type:complete_(+),score=90.42	0	+	1289	2441	0	1	3262	0	No
TRINITY_DN85_c3_g1_i1	.	-	TRINITY_DN2747_c0_g1_i60	0	3262	ID=TRINITY_DN2747_c0_g1_i60.p2;TRINITY_DN2747_c0_g1~~TRINITY_DN2747_c0_g1_i60.p2;ORF_type:complete_(+),score=71.16	0	+	176	1220	0	1	3262	0	No
TRINITY_DN85_c3_g1_i1	.	-	TRINITY_DN2747_c0_g1_i43	0	2885	ID=TRINITY_DN2747_c0_g1_i43.p1;TRINITY_DN2747_c0_g1~~TRINITY_DN2747_c0_g1_i43.p1;ORF_type:complete_(+),score=150.74	0	+	176	2159	0	1	2885	0	No
TRINITY_DN85_c3_g1_i1	.	-	TRINITY_DN2747_c0_g1_i15	0	3175	ID=TRINITY_DN2747_c0_g1_i15.p1;TRINITY_DN2747_c0_g1~~TRINITY_DN2747_c0_g1_i15.p1;ORF_type:complete_(+),score=160.66	0	+	176	2354	0	1	3175	0	No
TRINITY_DN85_c3_g1_i1	.	-	TRINITY_DN2747_c0_g1_i134	0	3168	ID=TRINITY_DN2747_c0_g1_i134.p2;TRINITY_DN2747_c0_g1~~TRINITY_DN2747_c0_g1_i134.p2;ORF_type:complete_(+),score=78.98	0	+	1330	2347	0	1	3168	0	No
TRINITY_DN85_c3_g1_i1	.	-	TRINITY_DN2747_c0_g1_i134	0	3168	ID=TRINITY_DN2747_c0_g1_i134.p1;TRINITY_DN2747_c0_g1~~TRINITY_DN2747_c0_g1_i134.p1;ORF_type:complete_(+),score=71.16	0	+	176	1220	0	1	3168	0	No
TRINITY_DN85_c3_g1_i1	.	-	TRINITY_DN2747_c0_g1_i118	0	3658	ID=TRINITY_DN2747_c0_g1_i118.p1;TRINITY_DN2747_c0_g1~~TRINITY_DN2747_c0_g1_i118.p1;ORF_type:complete_(+),score=124.82	0	+	1085	2837	0	1	3658	0	No
TRINITY_DN85_c3_g1_i1	.	-	TRINITY_DN2747_c0_g1_i118	0	3658	ID=TRINITY_DN2747_c0_g1_i118.p3;TRINITY_DN2747_c0_g1~~TRINITY_DN2747_c0_g1_i118.p3;ORF_type:complete_(+),score=34.49	0	+	176	632	0	1	3658	0	No
TRINITY_DN85_c3_g1_i1	.	-	TRINITY_DN2747_c0_g1_i100	0	3865	ID=TRINITY_DN2747_c0_g1_i100.p1;TRINITY_DN2747_c0_g1~~TRINITY_DN2747_c0_g1_i100.p1;ORF_type:complete_(+),score=142.37	0	+	1136	3044	0	1	3865	0	No
TRINITY_DN85_c8_g1_i1	.	-	TRINITY_DN191_c0_g9_i4	0	3830	ID=TRINITY_DN191_c0_g9_i4.p1;TRINITY_DN191_c0_g9~~TRINITY_DN191_c0_g9_i4.p1;ORF_type:3prime_partial_(-),score=3.71	0	-	0	2514	0	1	3830	0	No
TRINITY_DN77_c1_g1_i2	.	+	TRINITY_DN77_c1_g1_i1	0	1190	ID=TRINITY_DN77_c1_g1_i1.p1;TRINITY_DN77_c1_g1~~TRINITY_DN77_c1_g1_i1.p1;ORF_type:3prime_partial_(+),score=30.86	0	+	758	1190	0	1	1190	0	No
TRINITY_DN56_c1_g1_i1	.	+	TRINITY_DN4444_c0_g1_i5	0	956	ID=TRINITY_DN4444_c0_g1_i5.p1;TRINITY_DN4444_c0_g1~~TRINITY_DN4444_c0_g1_i5.p1;ORF_type:complete_(+),score=11.83	0	+	374	674	0	1	956	0	No
TRINITY_DN56_c1_g1_i1	.	-	TRINITY_DN1739_c0_g1_i9	0	12355	ID=TRINITY_DN1739_c0_g1_i9.p5;TRINITY_DN1739_c0_g1~~TRINITY_DN1739_c0_g1_i9.p5;ORF_type:complete_(+),score=12.79	0	+	4109	4676	0	1	12355	0	No
TRINITY_DN56_c1_g1_i1	.	-	TRINITY_DN1739_c0_g1_i9	0	12355	ID=TRINITY_DN1739_c0_g1_i9.p3;TRINITY_DN1739_c0_g1~~TRINITY_DN1739_c0_g1_i9.p3;ORF_type:complete_(+),score=-12.43	0	+	9388	10540	0	1	12355	0	No
TRINITY_DN56_c1_g1_i1	.	-	TRINITY_DN1739_c0_g1_i9	0	12355	ID=TRINITY_DN1739_c0_g1_i9.p1;TRINITY_DN1739_c0_g1~~TRINITY_DN1739_c0_g1_i9.p1;ORF_type:5prime_partial_(+),score=-25.76	0	+	1	2155	0	1	12355	0	No
TRINITY_DN56_c1_g1_i1	.	-	TRINITY_DN1739_c0_g1_i9	0	12355	ID=TRINITY_DN1739_c0_g1_i9.p4;TRINITY_DN1739_c0_g1~~TRINITY_DN1739_c0_g1_i9.p4;ORF_type:complete_(-),score=-34.59	0	-	10776	11718	0	1	12355	0	No
TRINITY_DN56_c1_g1_i1	.	-	TRINITY_DN1739_c0_g1_i9	0	12355	ID=TRINITY_DN1739_c0_g1_i9.p8;TRINITY_DN1739_c0_g1~~TRINITY_DN1739_c0_g1_i9.p8;ORF_type:complete_(+),score=0.72	0	+	8108	8414	0	1	12355	0	No
TRINITY_DN56_c1_g1_i1	.	-	TRINITY_DN1739_c0_g1_i9	0	12355	ID=TRINITY_DN1739_c0_g1_i9.p2;TRINITY_DN1739_c0_g1~~TRINITY_DN1739_c0_g1_i9.p2;ORF_type:complete_(+),score=15.03	0	+	2926	4108	0	1	12355	0	No
TRINITY_DN56_c1_g1_i1	.	+	TRINITY_DN3680_c0_g1_i32	0	5556	ID=TRINITY_DN3680_c0_g1_i32.p1;TRINITY_DN3680_c0_g1~~TRINITY_DN3680_c0_g1_i32.p1;ORF_type:complete_(-),score=27.32	0	-	3537	3999	0	1	5556	0	No
TRINITY_DN56_c1_g1_i1	.	+	TRINITY_DN3680_c0_g1_i32	0	5556	ID=TRINITY_DN3680_c0_g1_i32.p2;TRINITY_DN3680_c0_g1~~TRINITY_DN3680_c0_g1_i32.p2;ORF_type:complete_(-),score=31.57	0	-	1906	2350	0	1	5556	0	No
TRINITY_DN56_c1_g1_i1	.	+	TRINITY_DN3680_c0_g1_i32	0	5556	ID=TRINITY_DN3680_c0_g1_i32.p3;TRINITY_DN3680_c0_g1~~TRINITY_DN3680_c0_g1_i32.p3;ORF_type:complete_(-),score=25.01	0	-	3998	4358	0	1	5556	0	No
TRINITY_DN56_c1_g1_i1	.	+	TRINITY_DN7667_c0_g1_i9	0	5910	ID=TRINITY_DN7667_c0_g1_i9.p1;TRINITY_DN7667_c0_g1~~TRINITY_DN7667_c0_g1_i9.p1;ORF_type:complete_(-),score=64.53	0	-	866	1568	0	1	5910	0	No
TRINITY_DN56_c1_g1_i1	.	+	TRINITY_DN7667_c0_g1_i9	0	5910	ID=TRINITY_DN7667_c0_g1_i9.p2;TRINITY_DN7667_c0_g1~~TRINITY_DN7667_c0_g1_i9.p2;ORF_type:complete_(-),score=4.91	0	-	5311	5728	0	1	5910	0	No
TRINITY_DN56_c1_g1_i1	.	+	TRINITY_DN7667_c0_g1_i31	0	4980	ID=TRINITY_DN7667_c0_g1_i31.p1;TRINITY_DN7667_c0_g1~~TRINITY_DN7667_c0_g1_i31.p1;ORF_type:complete_(-),score=19.05	0	-	3913	4219	0	1	4980	0	No
TRINITY_DN56_c1_g1_i1	.	+	TRINITY_DN7667_c0_g1_i28	0	5074	ID=TRINITY_DN7667_c0_g1_i28.p2;TRINITY_DN7667_c0_g1~~TRINITY_DN7667_c0_g1_i28.p2;ORF_type:complete_(-),score=23.26	0	-	4328	4892	0	1	5074	0	No
TRINITY_DN56_c1_g1_i1	.	+	TRINITY_DN7667_c0_g1_i28	0	5074	ID=TRINITY_DN7667_c0_g1_i28.p1;TRINITY_DN7667_c0_g1~~TRINITY_DN7667_c0_g1_i28.p1;ORF_type:complete_(-),score=64.53	0	-	866	1568	0	1	5074	0	No
TRINITY_DN56_c1_g1_i1	.	+	TRINITY_DN504_c0_g3_i3	0	3065	ID=TRINITY_DN504_c0_g3_i3.p1;TRINITY_DN504_c0_g3~~TRINITY_DN504_c0_g3_i3.p1;ORF_type:complete_(-),score=143.92	0	-	702	2925	0	1	3065	0	No
TRINITY_DN56_c1_g1_i1	.	+	TRINITY_DN504_c0_g3_i2	0	3065	ID=TRINITY_DN504_c0_g3_i2.p1;TRINITY_DN504_c0_g3~~TRINITY_DN504_c0_g3_i2.p1;ORF_type:complete_(-),score=141.37	0	-	702	2925	0	1	3065	0	No
TRINITY_DN56_c1_g1_i1	.	+	TRINITY_DN504_c0_g3_i1	0	3065	ID=TRINITY_DN504_c0_g3_i1.p1;TRINITY_DN504_c0_g3~~TRINITY_DN504_c0_g3_i1.p1;ORF_type:complete_(-),score=140.30	0	-	702	2925	0	1	3065	0	No
TRINITY_DN56_c1_g1_i1	.	+	TRINITY_DN105178_c0_g1_i1	0	3190	ID=TRINITY_DN105178_c0_g1_i1.p1;TRINITY_DN105178_c0_g1~~TRINITY_DN105178_c0_g1_i1.p1;ORF_type:complete_(-),score=9.87	0	-	282	588	0	1	3190	0	No
TRINITY_DN56_c1_g1_i1	.	+	TRINITY_DN16958_c0_g1_i1	0	3582	ID=TRINITY_DN16958_c0_g1_i1.p1;TRINITY_DN16958_c0_g1~~TRINITY_DN16958_c0_g1_i1.p1;ORF_type:complete_(-),score=173.17	0	-	820	3049	0	1	3582	0	No
TRINITY_DN56_c2_g1_i1	.	-	TRINITY_DN105178_c0_g1_i1	0	3190	ID=TRINITY_DN105178_c0_g1_i1.p1;TRINITY_DN105178_c0_g1~~TRINITY_DN105178_c0_g1_i1.p1;ORF_type:complete_(-),score=9.87	0	-	282	588	0	1	3190	0	No
TRINITY_DN56_c2_g1_i1	.	+	TRINITY_DN101453_c0_g1_i2	0	3577	ID=TRINITY_DN101453_c0_g1_i2.p1;TRINITY_DN101453_c0_g1~~TRINITY_DN101453_c0_g1_i2.p1;ORF_type:complete_(-),score=79.29	0	-	251	1757	0	1	3577	0	No
TRINITY_DN56_c2_g1_i1	.	+	TRINITY_DN101453_c0_g1_i2	0	3577	ID=TRINITY_DN101453_c0_g1_i2.p2;TRINITY_DN101453_c0_g1~~TRINITY_DN101453_c0_g1_i2.p2;ORF_type:complete_(-),score=26.62	0	-	1810	2479	0	1	3577	0	No
TRINITY_DN56_c2_g1_i1	.	+	TRINITY_DN101453_c0_g1_i1	0	3657	ID=TRINITY_DN101453_c0_g1_i1.p1;TRINITY_DN101453_c0_g1~~TRINITY_DN101453_c0_g1_i1.p1;ORF_type:complete_(-),score=79.29	0	-	251	1757	0	1	3657	0	No
TRINITY_DN56_c2_g1_i1	.	-	TRINITY_DN16958_c0_g1_i1	0	3582	ID=TRINITY_DN16958_c0_g1_i1.p1;TRINITY_DN16958_c0_g1~~TRINITY_DN16958_c0_g1_i1.p1;ORF_type:complete_(-),score=173.17	0	-	820	3049	0	1	3582	0	No
TRINITY_DN56_c2_g1_i1	.	+	TRINITY_DN2500_c0_g1_i27	0	6707	ID=TRINITY_DN2500_c0_g1_i27.p2;TRINITY_DN2500_c0_g1~~TRINITY_DN2500_c0_g1_i27.p2;ORF_type:3prime_partial_(-),score=3.50	0	-	0	324	0	1	6707	0	No
TRINITY_DN56_c2_g1_i1	.	+	TRINITY_DN2500_c0_g1_i27	0	6707	ID=TRINITY_DN2500_c0_g1_i27.p1;TRINITY_DN2500_c0_g1~~TRINITY_DN2500_c0_g1_i27.p1;ORF_type:complete_(-),score=58.68	0	-	5581	6454	0	1	6707	0	No
TRINITY_DN56_c2_g1_i1	.	+	TRINITY_DN2500_c0_g1_i19	0	6623	ID=TRINITY_DN2500_c0_g1_i19.p2;TRINITY_DN2500_c0_g1~~TRINITY_DN2500_c0_g1_i19.p2;ORF_type:3prime_partial_(-),score=3.50	0	-	0	324	0	1	6623	0	No
TRINITY_DN56_c2_g1_i1	.	+	TRINITY_DN2500_c0_g1_i19	0	6623	ID=TRINITY_DN2500_c0_g1_i19.p1;TRINITY_DN2500_c0_g1~~TRINITY_DN2500_c0_g1_i19.p1;ORF_type:complete_(-),score=58.68	0	-	5581	6454	0	1	6623	0	No
TRINITY_DN66_c1_g1_i12	.	+	TRINITY_DN10225_c0_g1_i1	0	332	ID=TRINITY_DN10225_c0_g1_i1.p1;TRINITY_DN10225_c0_g1~~TRINITY_DN10225_c0_g1_i1.p1;ORF_type:internal_(+),score=13.15	0	+	2	332	0	1	332	0	No
TRINITY_DN66_c1_g1_i12	.	+	TRINITY_DN66_c1_g1_i28	0	793	ID=TRINITY_DN66_c1_g1_i28.p1;TRINITY_DN66_c1_g1~~TRINITY_DN66_c1_g1_i28.p1;ORF_type:complete_(+),score=25.52	0	+	60	666	0	1	793	0	No
TRINITY_DN66_c1_g1_i12	.	+	TRINITY_DN29_c7_g1_i4	0	2447	ID=TRINITY_DN29_c7_g1_i4.p1;TRINITY_DN29_c7_g1~~TRINITY_DN29_c7_g1_i4.p1;ORF_type:3prime_partial_(+),score=4.88	0	+	2072	2447	0	1	2447	0	No
TRINITY_DN66_c1_g1_i12	.	+	TRINITY_DN66_c1_g1_i23	0	925	ID=TRINITY_DN66_c1_g1_i23.p1;TRINITY_DN66_c1_g1~~TRINITY_DN66_c1_g1_i23.p1;ORF_type:complete_(+),score=25.52	0	+	60	666	0	1	925	0	No
TRINITY_DN66_c1_g1_i12	.	+	TRINITY_DN66_c1_g1_i7	0	971	ID=TRINITY_DN66_c1_g1_i7.p1;TRINITY_DN66_c1_g1~~TRINITY_DN66_c1_g1_i7.p1;ORF_type:complete_(+),score=25.52	0	+	60	666	0	1	971	0	No
TRINITY_DN66_c1_g1_i12	.	+	TRINITY_DN66_c1_g1_i27	0	675	ID=TRINITY_DN66_c1_g1_i27.p1;TRINITY_DN66_c1_g1~~TRINITY_DN66_c1_g1_i27.p1;ORF_type:5prime_partial_(+),score=14.62	0	+	1	370	0	1	675	0	No
TRINITY_DN66_c1_g1_i12	.	-	TRINITY_DN5444_c0_g1_i2	0	308	ID=TRINITY_DN5444_c0_g1_i2.p1;TRINITY_DN5444_c0_g1~~TRINITY_DN5444_c0_g1_i2.p1;ORF_type:internal_(-),score=8.68	0	-	1	307	0	1	308	0	No
TRINITY_DN66_c1_g1_i12	.	-	TRINITY_DN5444_c0_g1_i3	0	308	ID=TRINITY_DN5444_c0_g1_i3.p1;TRINITY_DN5444_c0_g1~~TRINITY_DN5444_c0_g1_i3.p1;ORF_type:internal_(-),score=9.22	0	-	1	307	0	1	308	0	No
TRINITY_DN66_c1_g1_i12	.	+	TRINITY_DN66_c1_g1_i20	0	701	ID=TRINITY_DN66_c1_g1_i20.p1;TRINITY_DN66_c1_g1~~TRINITY_DN66_c1_g1_i20.p1;ORF_type:complete_(+),score=23.30	0	+	60	666	0	1	701	0	No
TRINITY_DN66_c1_g1_i12	.	-	TRINITY_DN4967_c2_g1_i1	0	653	ID=TRINITY_DN4967_c2_g1_i1.p1;TRINITY_DN4967_c2_g1~~TRINITY_DN4967_c2_g1_i1.p1;ORF_type:3prime_partial_(-),score=5.25	0	-	1	307	0	1	653	0	No
TRINITY_DN66_c1_g1_i12	.	+	TRINITY_DN5620_c5_g1_i3	0	321	ID=TRINITY_DN5620_c5_g1_i3.p1;TRINITY_DN5620_c5_g1~~TRINITY_DN5620_c5_g1_i3.p1;ORF_type:internal_(+),score=16.16	0	+	1	319	0	1	321	0	No
TRINITY_DN66_c1_g1_i21	.	+	TRINITY_DN66_c1_g1_i28	0	793	ID=TRINITY_DN66_c1_g1_i28.p1;TRINITY_DN66_c1_g1~~TRINITY_DN66_c1_g1_i28.p1;ORF_type:complete_(+),score=25.52	0	+	60	666	0	1	793	0	No
TRINITY_DN66_c1_g1_i21	.	+	TRINITY_DN10225_c0_g1_i1	0	332	ID=TRINITY_DN10225_c0_g1_i1.p1;TRINITY_DN10225_c0_g1~~TRINITY_DN10225_c0_g1_i1.p1;ORF_type:internal_(+),score=13.15	0	+	2	332	0	1	332	0	No
TRINITY_DN66_c1_g1_i21	.	+	TRINITY_DN66_c1_g1_i23	0	925	ID=TRINITY_DN66_c1_g1_i23.p1;TRINITY_DN66_c1_g1~~TRINITY_DN66_c1_g1_i23.p1;ORF_type:complete_(+),score=25.52	0	+	60	666	0	1	925	0	No
TRINITY_DN66_c1_g1_i21	.	+	TRINITY_DN66_c1_g1_i7	0	971	ID=TRINITY_DN66_c1_g1_i7.p1;TRINITY_DN66_c1_g1~~TRINITY_DN66_c1_g1_i7.p1;ORF_type:complete_(+),score=25.52	0	+	60	666	0	1	971	0	No
TRINITY_DN66_c1_g1_i21	.	+	TRINITY_DN66_c1_g1_i27	0	675	ID=TRINITY_DN66_c1_g1_i27.p1;TRINITY_DN66_c1_g1~~TRINITY_DN66_c1_g1_i27.p1;ORF_type:5prime_partial_(+),score=14.62	0	+	1	370	0	1	675	0	No
TRINITY_DN66_c1_g1_i21	.	+	TRINITY_DN66_c1_g1_i20	0	701	ID=TRINITY_DN66_c1_g1_i20.p1;TRINITY_DN66_c1_g1~~TRINITY_DN66_c1_g1_i20.p1;ORF_type:complete_(+),score=23.30	0	+	60	666	0	1	701	0	No
TRINITY_DN66_c1_g1_i21	.	-	TRINITY_DN4967_c2_g1_i1	0	653	ID=TRINITY_DN4967_c2_g1_i1.p1;TRINITY_DN4967_c2_g1~~TRINITY_DN4967_c2_g1_i1.p1;ORF_type:3prime_partial_(-),score=5.25	0	-	1	307	0	1	653	0	No
TRINITY_DN66_c1_g1_i21	.	-	TRINITY_DN5444_c0_g1_i2	0	308	ID=TRINITY_DN5444_c0_g1_i2.p1;TRINITY_DN5444_c0_g1~~TRINITY_DN5444_c0_g1_i2.p1;ORF_type:internal_(-),score=8.68	0	-	1	307	0	1	308	0	No
TRINITY_DN66_c1_g1_i21	.	-	TRINITY_DN5444_c0_g1_i3	0	308	ID=TRINITY_DN5444_c0_g1_i3.p1;TRINITY_DN5444_c0_g1~~TRINITY_DN5444_c0_g1_i3.p1;ORF_type:internal_(-),score=9.22	0	-	1	307	0	1	308	0	No
TRINITY_DN66_c1_g1_i21	.	+	TRINITY_DN29_c7_g1_i4	0	2447	ID=TRINITY_DN29_c7_g1_i4.p1;TRINITY_DN29_c7_g1~~TRINITY_DN29_c7_g1_i4.p1;ORF_type:3prime_partial_(+),score=4.88	0	+	2072	2447	0	1	2447	0	No
TRINITY_DN66_c1_g1_i21	.	+	TRINITY_DN5620_c5_g1_i3	0	321	ID=TRINITY_DN5620_c5_g1_i3.p1;TRINITY_DN5620_c5_g1~~TRINITY_DN5620_c5_g1_i3.p1;ORF_type:internal_(+),score=16.16	0	+	1	319	0	1	321	0	No
TRINITY_DN66_c1_g1_i24	.	-	TRINITY_DN4395_c1_g1_i3	0	4382	ID=TRINITY_DN4395_c1_g1_i3.p1;TRINITY_DN4395_c1_g1~~TRINITY_DN4395_c1_g1_i3.p1;ORF_type:complete_(-),score=22.28	0	-	1102	1633	0	1	4382	0	No
TRINITY_DN66_c1_g1_i24	.	-	TRINITY_DN4395_c1_g1_i3	0	4382	ID=TRINITY_DN4395_c1_g1_i3.p2;TRINITY_DN4395_c1_g1~~TRINITY_DN4395_c1_g1_i3.p2;ORF_type:complete_(-),score=15.78	0	-	3551	3857	0	1	4382	0	No
TRINITY_DN66_c1_g1_i24	.	-	TRINITY_DN4395_c1_g1_i3	0	4382	ID=TRINITY_DN4395_c1_g1_i3.p3;TRINITY_DN4395_c1_g1~~TRINITY_DN4395_c1_g1_i3.p3;ORF_type:complete_(-),score=4.24	0	-	92	398	0	1	4382	0	No
TRINITY_DN66_c1_g1_i24	.	-	TRINITY_DN4395_c1_g1_i1	0	4532	ID=TRINITY_DN4395_c1_g1_i1.p3;TRINITY_DN4395_c1_g1~~TRINITY_DN4395_c1_g1_i1.p3;ORF_type:complete_(-),score=4.24	0	-	92	398	0	1	4532	0	No
TRINITY_DN66_c1_g1_i24	.	-	TRINITY_DN4395_c1_g1_i1	0	4532	ID=TRINITY_DN4395_c1_g1_i1.p2;TRINITY_DN4395_c1_g1~~TRINITY_DN4395_c1_g1_i1.p2;ORF_type:complete_(-),score=15.78	0	-	3551	3857	0	1	4532	0	No
TRINITY_DN66_c1_g1_i24	.	-	TRINITY_DN4395_c1_g1_i1	0	4532	ID=TRINITY_DN4395_c1_g1_i1.p1;TRINITY_DN4395_c1_g1~~TRINITY_DN4395_c1_g1_i1.p1;ORF_type:complete_(-),score=22.28	0	-	1102	1633	0	1	4532	0	No
TRINITY_DN66_c1_g1_i24	.	+	TRINITY_DN4306_c0_g1_i3	0	9922	ID=TRINITY_DN4306_c0_g1_i3.p3;TRINITY_DN4306_c0_g1~~TRINITY_DN4306_c0_g1_i3.p3;ORF_type:complete_(+),score=34.10	0	+	143	668	0	1	9922	0	No
TRINITY_DN66_c1_g1_i24	.	+	TRINITY_DN4306_c0_g1_i3	0	9922	ID=TRINITY_DN4306_c0_g1_i3.p1;TRINITY_DN4306_c0_g1~~TRINITY_DN4306_c0_g1_i3.p1;ORF_type:complete_(-),score=44.78	0	-	3678	4542	0	1	9922	0	No
TRINITY_DN66_c1_g1_i24	.	+	TRINITY_DN4306_c0_g1_i3	0	9922	ID=TRINITY_DN4306_c0_g1_i3.p2;TRINITY_DN4306_c0_g1~~TRINITY_DN4306_c0_g1_i3.p2;ORF_type:complete_(+),score=41.43	0	+	1564	2134	0	1	9922	0	No
TRINITY_DN66_c1_g1_i24	.	+	TRINITY_DN4306_c0_g1_i3	0	9922	ID=TRINITY_DN4306_c0_g1_i3.p4;TRINITY_DN4306_c0_g1~~TRINITY_DN4306_c0_g1_i3.p4;ORF_type:complete_(+),score=18.70	0	+	733	1108	0	1	9922	0	No
TRINITY_DN66_c1_g1_i24	.	+	TRINITY_DN4306_c0_g1_i20	0	6654	ID=TRINITY_DN4306_c0_g1_i20.p2;TRINITY_DN4306_c0_g1~~TRINITY_DN4306_c0_g1_i20.p2;ORF_type:complete_(-),score=10.53	0	-	971	1274	0	1	6654	0	No
TRINITY_DN66_c1_g1_i24	.	+	TRINITY_DN4306_c0_g1_i20	0	6654	ID=TRINITY_DN4306_c0_g1_i20.p1;TRINITY_DN4306_c0_g1~~TRINITY_DN4306_c0_g1_i20.p1;ORF_type:3prime_partial_(-),score=24.94	0	-	2	458	0	1	6654	0	No
TRINITY_DN66_c1_g1_i24	.	+	TRINITY_DN4306_c0_g1_i2	0	7214	ID=TRINITY_DN4306_c0_g1_i2.p1;TRINITY_DN4306_c0_g1~~TRINITY_DN4306_c0_g1_i2.p1;ORF_type:complete_(-),score=10.53	0	-	1531	1834	0	1	7214	0	No
TRINITY_DN66_c1_g1_i24	.	+	TRINITY_DN4306_c0_g1_i13	0	6764	ID=TRINITY_DN4306_c0_g1_i13.p1;TRINITY_DN4306_c0_g1~~TRINITY_DN4306_c0_g1_i13.p1;ORF_type:complete_(-),score=53.83	0	-	454	1384	0	1	6764	0	No
TRINITY_DN66_c1_g1_i5	.	+	TRINITY_DN66_c1_g1_i20	0	701	ID=TRINITY_DN66_c1_g1_i20.p1;TRINITY_DN66_c1_g1~~TRINITY_DN66_c1_g1_i20.p1;ORF_type:complete_(+),score=23.30	0	+	60	666	0	1	701	0	No
TRINITY_DN66_c1_g1_i5	.	-	TRINITY_DN4967_c2_g1_i1	0	653	ID=TRINITY_DN4967_c2_g1_i1.p1;TRINITY_DN4967_c2_g1~~TRINITY_DN4967_c2_g1_i1.p1;ORF_type:3prime_partial_(-),score=5.25	0	-	1	307	0	1	653	0	No
TRINITY_DN66_c1_g1_i5	.	+	TRINITY_DN66_c1_g1_i7	0	971	ID=TRINITY_DN66_c1_g1_i7.p1;TRINITY_DN66_c1_g1~~TRINITY_DN66_c1_g1_i7.p1;ORF_type:complete_(+),score=25.52	0	+	60	666	0	1	971	0	No
TRINITY_DN66_c1_g1_i5	.	+	TRINITY_DN66_c1_g1_i27	0	675	ID=TRINITY_DN66_c1_g1_i27.p1;TRINITY_DN66_c1_g1~~TRINITY_DN66_c1_g1_i27.p1;ORF_type:5prime_partial_(+),score=14.62	0	+	1	370	0	1	675	0	No
TRINITY_DN66_c1_g1_i5	.	+	TRINITY_DN66_c1_g1_i23	0	925	ID=TRINITY_DN66_c1_g1_i23.p1;TRINITY_DN66_c1_g1~~TRINITY_DN66_c1_g1_i23.p1;ORF_type:complete_(+),score=25.52	0	+	60	666	0	1	925	0	No
TRINITY_DN66_c1_g1_i5	.	+	TRINITY_DN66_c1_g1_i28	0	793	ID=TRINITY_DN66_c1_g1_i28.p1;TRINITY_DN66_c1_g1~~TRINITY_DN66_c1_g1_i28.p1;ORF_type:complete_(+),score=25.52	0	+	60	666	0	1	793	0	No
TRINITY_DN66_c1_g1_i5	.	+	TRINITY_DN66_c1_g1_i22	0	326	ID=TRINITY_DN66_c1_g1_i22.p1;TRINITY_DN66_c1_g1~~TRINITY_DN66_c1_g1_i22.p1;ORF_type:internal_(+),score=4.84	0	+	0	324	0	1	326	0	No
TRINITY_DN66_c1_g1_i5	.	-	TRINITY_DN5447_c0_g2_i5	0	1328	ID=TRINITY_DN5447_c0_g2_i5.p1;TRINITY_DN5447_c0_g2~~TRINITY_DN5447_c0_g2_i5.p1;ORF_type:complete_(+),score=3.18	0	+	663	1008	0	1	1328	0	No
TRINITY_DN66_c5_g1_i4	.	+	TRINITY_DN5444_c0_g1_i3	0	308	ID=TRINITY_DN5444_c0_g1_i3.p1;TRINITY_DN5444_c0_g1~~TRINITY_DN5444_c0_g1_i3.p1;ORF_type:internal_(-),score=9.22	0	-	1	307	0	1	308	0	No
TRINITY_DN66_c5_g1_i4	.	+	TRINITY_DN5444_c0_g1_i2	0	308	ID=TRINITY_DN5444_c0_g1_i2.p1;TRINITY_DN5444_c0_g1~~TRINITY_DN5444_c0_g1_i2.p1;ORF_type:internal_(-),score=8.68	0	-	1	307	0	1	308	0	No
TRINITY_DN52_c1_g1_i1	.	-	TRINITY_DN5538_c0_g1_i4	0	3877	ID=TRINITY_DN5538_c0_g1_i4.p3;TRINITY_DN5538_c0_g1~~TRINITY_DN5538_c0_g1_i4.p3;ORF_type:complete_(+),score=18.06	0	+	1342	1669	0	1	3877	0	No
TRINITY_DN52_c1_g1_i1	.	-	TRINITY_DN5538_c0_g1_i4	0	3877	ID=TRINITY_DN5538_c0_g1_i4.p2;TRINITY_DN5538_c0_g1~~TRINITY_DN5538_c0_g1_i4.p2;ORF_type:complete_(+),score=19.97	0	+	2807	3173	0	1	3877	0	No
TRINITY_DN52_c1_g1_i1	.	-	TRINITY_DN5538_c0_g1_i4	0	3877	ID=TRINITY_DN5538_c0_g1_i4.p1;TRINITY_DN5538_c0_g1~~TRINITY_DN5538_c0_g1_i4.p1;ORF_type:5prime_partial_(+),score=35.26	0	+	0	468	0	1	3877	0	No
TRINITY_DN52_c1_g1_i1	.	-	TRINITY_DN5538_c0_g1_i33	0	2128	ID=TRINITY_DN5538_c0_g1_i33.p1;TRINITY_DN5538_c0_g1~~TRINITY_DN5538_c0_g1_i33.p1;ORF_type:5prime_partial_(+),score=33.03	0	+	0	492	0	1	2128	0	No
TRINITY_DN52_c1_g1_i1	.	-	TRINITY_DN5538_c0_g1_i33	0	2128	ID=TRINITY_DN5538_c0_g1_i33.p3;TRINITY_DN5538_c0_g1~~TRINITY_DN5538_c0_g1_i33.p3;ORF_type:complete_(-),score=3.22	0	-	924	1296	0	1	2128	0	No
TRINITY_DN52_c1_g1_i1	.	-	TRINITY_DN5538_c0_g1_i31	0	4579	ID=TRINITY_DN5538_c0_g1_i31.p1;TRINITY_DN5538_c0_g1~~TRINITY_DN5538_c0_g1_i31.p1;ORF_type:5prime_partial_(+),score=35.26	0	+	0	468	0	1	4579	0	No
TRINITY_DN52_c1_g1_i1	.	-	TRINITY_DN5538_c0_g1_i31	0	4579	ID=TRINITY_DN5538_c0_g1_i31.p3;TRINITY_DN5538_c0_g1~~TRINITY_DN5538_c0_g1_i31.p3;ORF_type:complete_(+),score=19.97	0	+	3509	3875	0	1	4579	0	No
TRINITY_DN52_c1_g1_i1	.	-	TRINITY_DN5538_c0_g1_i31	0	4579	ID=TRINITY_DN5538_c0_g1_i31.p2;TRINITY_DN5538_c0_g1~~TRINITY_DN5538_c0_g1_i31.p2;ORF_type:complete_(-),score=3.22	0	-	2089	2461	0	1	4579	0	No
TRINITY_DN52_c1_g1_i1	.	-	TRINITY_DN5538_c0_g1_i22	0	1756	ID=TRINITY_DN5538_c0_g1_i22.p1;TRINITY_DN5538_c0_g1~~TRINITY_DN5538_c0_g1_i22.p1;ORF_type:complete_(+),score=58.53	0	+	111	834	0	1	1756	0	No
TRINITY_DN52_c1_g1_i1	.	-	TRINITY_DN5538_c0_g1_i12	0	3941	ID=TRINITY_DN5538_c0_g1_i12.p1;TRINITY_DN5538_c0_g1~~TRINITY_DN5538_c0_g1_i12.p1;ORF_type:complete_(+),score=19.97	0	+	2871	3237	0	1	3941	0	No
TRINITY_DN52_c1_g1_i1	.	-	TRINITY_DN5538_c0_g1_i12	0	3941	ID=TRINITY_DN5538_c0_g1_i12.p2;TRINITY_DN5538_c0_g1~~TRINITY_DN5538_c0_g1_i12.p2;ORF_type:complete_(+),score=21.31	0	+	202	532	0	1	3941	0	No
TRINITY_DN52_c1_g1_i1	.	-	TRINITY_DN5538_c0_g1_i12	0	3941	ID=TRINITY_DN5538_c0_g1_i12.p3;TRINITY_DN5538_c0_g1~~TRINITY_DN5538_c0_g1_i12.p3;ORF_type:complete_(+),score=18.06	0	+	1406	1733	0	1	3941	0	No
TRINITY_DN52_c1_g1_i1	.	+	TRINITY_DN969_c0_g1_i181	0	2798	ID=TRINITY_DN969_c0_g1_i181.p2;TRINITY_DN969_c0_g1~~TRINITY_DN969_c0_g1_i181.p2;ORF_type:5prime_partial_(-),score=39.44	0	-	2359	2797	0	1	2798	0	No
TRINITY_DN52_c1_g1_i1	.	+	TRINITY_DN969_c0_g1_i181	0	2798	ID=TRINITY_DN969_c0_g1_i181.p1;TRINITY_DN969_c0_g1~~TRINITY_DN969_c0_g1_i181.p1;ORF_type:complete_(-),score=74.72	0	-	409	1444	0	1	2798	0	No
TRINITY_DN52_c1_g1_i1	.	+	TRINITY_DN969_c0_g1_i128	0	8809	ID=TRINITY_DN969_c0_g1_i128.p6;TRINITY_DN969_c0_g1~~TRINITY_DN969_c0_g1_i128.p6;ORF_type:complete_(+),score=8.00	0	+	6923	7229	0	1	8809	0	No
TRINITY_DN52_c1_g1_i1	.	+	TRINITY_DN969_c0_g1_i128	0	8809	ID=TRINITY_DN969_c0_g1_i128.p1;TRINITY_DN969_c0_g1~~TRINITY_DN969_c0_g1_i128.p1;ORF_type:complete_(-),score=80.91	0	-	1380	2445	0	1	8809	0	No
TRINITY_DN52_c1_g1_i1	.	+	TRINITY_DN969_c0_g1_i128	0	8809	ID=TRINITY_DN969_c0_g1_i128.p2;TRINITY_DN969_c0_g1~~TRINITY_DN969_c0_g1_i128.p2;ORF_type:complete_(-),score=86.41	0	-	5814	6840	0	1	8809	0	No
TRINITY_DN52_c1_g1_i1	.	+	TRINITY_DN969_c0_g1_i128	0	8809	ID=TRINITY_DN969_c0_g1_i128.p3;TRINITY_DN969_c0_g1~~TRINITY_DN969_c0_g1_i128.p3;ORF_type:complete_(-),score=44.95	0	-	3803	4478	0	1	8809	0	No
TRINITY_DN52_c1_g1_i1	.	-	TRINITY_DN9374_c0_g2_i8	0	3030	ID=TRINITY_DN9374_c0_g2_i8.p1;TRINITY_DN9374_c0_g2~~TRINITY_DN9374_c0_g2_i8.p1;ORF_type:complete_(+),score=18.15	0	+	1306	1732	0	1	3030	0	No
TRINITY_DN52_c1_g1_i1	.	-	TRINITY_DN980_c4_g1_i1	0	805	ID=TRINITY_DN980_c4_g1_i1.p2;TRINITY_DN980_c4_g1~~TRINITY_DN980_c4_g1_i1.p2;ORF_type:complete_(+),score=0.36	0	+	65	386	0	1	805	0	No
TRINITY_DN52_c1_g1_i1	.	-	TRINITY_DN980_c4_g1_i1	0	805	ID=TRINITY_DN980_c4_g1_i1.p1;TRINITY_DN980_c4_g1~~TRINITY_DN980_c4_g1_i1.p1;ORF_type:complete_(+),score=1.92	0	+	367	700	0	1	805	0	No
TRINITY_DN52_c1_g1_i1	.	+	TRINITY_DN359_c1_g1_i27	0	1300	ID=TRINITY_DN359_c1_g1_i27.p1;TRINITY_DN359_c1_g1~~TRINITY_DN359_c1_g1_i27.p1;ORF_type:5prime_partial_(+),score=5.14	0	+	0	327	0	1	1300	0	No
TRINITY_DN52_c1_g1_i1	.	-	TRINITY_DN29958_c0_g1_i1	0	1606	ID=TRINITY_DN29958_c0_g1_i1.p1;TRINITY_DN29958_c0_g1~~TRINITY_DN29958_c0_g1_i1.p1;ORF_type:5prime_partial_(-),score=62.89	0	-	386	1604	0	1	1606	0	No
TRINITY_DN39_c0_g2_i1	.	+	TRINITY_DN39_c0_g2_i1	0	820	ID=TRINITY_DN39_c0_g2_i1.p1;TRINITY_DN39_c0_g2~~TRINITY_DN39_c0_g2_i1.p1;ORF_type:5prime_partial_(-),score=16.28	0	-	321	819	0	1	820	0	No
TRINITY_DN39_c0_g2_i1	.	+	TRINITY_DN21789_c0_g1_i1	0	408	ID=TRINITY_DN21789_c0_g1_i1.p1;TRINITY_DN21789_c0_g1~~TRINITY_DN21789_c0_g1_i1.p1;ORF_type:5prime_partial_(-),score=11.73	0	-	66	408	0	1	408	0	No
TRINITY_DN39_c0_g2_i1	.	+	TRINITY_DN39_c0_g1_i22	0	2189	ID=TRINITY_DN39_c0_g1_i22.p2;TRINITY_DN39_c0_g1~~TRINITY_DN39_c0_g1_i22.p2;ORF_type:complete_(-),score=14.94	0	-	68	458	0	1	2189	0	No
TRINITY_DN39_c0_g2_i1	.	+	TRINITY_DN39_c0_g1_i22	0	2189	ID=TRINITY_DN39_c0_g1_i22.p1;TRINITY_DN39_c0_g1~~TRINITY_DN39_c0_g1_i22.p1;ORF_type:5prime_partial_(-),score=28.50	0	-	1531	2188	0	1	2189	0	No
TRINITY_DN39_c0_g2_i1	.	+	TRINITY_DN39_c0_g1_i11	0	3280	ID=TRINITY_DN39_c0_g1_i11.p2;TRINITY_DN39_c0_g1~~TRINITY_DN39_c0_g1_i11.p2;ORF_type:complete_(-),score=14.94	0	-	68	458	0	1	3280	0	No
TRINITY_DN39_c0_g2_i1	.	+	TRINITY_DN39_c0_g1_i11	0	3280	ID=TRINITY_DN39_c0_g1_i11.p1;TRINITY_DN39_c0_g1~~TRINITY_DN39_c0_g1_i11.p1;ORF_type:complete_(-),score=54.78	0	-	1531	2980	0	1	3280	0	No
TRINITY_DN39_c0_g2_i1	.	+	TRINITY_DN39_c0_g1_i20	0	3510	ID=TRINITY_DN39_c0_g1_i20.p1;TRINITY_DN39_c0_g1~~TRINITY_DN39_c0_g1_i20.p1;ORF_type:complete_(-),score=30.83	0	-	2199	3210	0	1	3510	0	No
TRINITY_DN39_c0_g2_i1	.	+	TRINITY_DN39_c0_g1_i20	0	3510	ID=TRINITY_DN39_c0_g1_i20.p2;TRINITY_DN39_c0_g1~~TRINITY_DN39_c0_g1_i20.p2;ORF_type:complete_(-),score=14.94	0	-	68	458	0	1	3510	0	No
TRINITY_DN39_c0_g2_i1	.	+	TRINITY_DN3120_c0_g1_i3	0	1007	ID=TRINITY_DN3120_c0_g1_i3.p1;TRINITY_DN3120_c0_g1~~TRINITY_DN3120_c0_g1_i3.p1;ORF_type:3prime_partial_(-),score=32.84	0	-	2	911	0	1	1007	0	No
TRINITY_DN39_c0_g2_i1	.	+	TRINITY_DN3120_c0_g1_i1	0	1166	ID=TRINITY_DN3120_c0_g1_i1.p1;TRINITY_DN3120_c0_g1~~TRINITY_DN3120_c0_g1_i1.p1;ORF_type:complete_(-),score=7.49	0	-	485	1070	0	1	1166	0	No
TRINITY_DN39_c0_g2_i1	.	+	TRINITY_DN3120_c0_g1_i2	0	1258	ID=TRINITY_DN3120_c0_g1_i2.p1;TRINITY_DN3120_c0_g1~~TRINITY_DN3120_c0_g1_i2.p1;ORF_type:complete_(-),score=7.49	0	-	577	1162	0	1	1258	0	No
TRINITY_DN39_c0_g2_i1	.	+	TRINITY_DN39_c0_g1_i7	0	3629	ID=TRINITY_DN39_c0_g1_i7.p1;TRINITY_DN39_c0_g1~~TRINITY_DN39_c0_g1_i7.p1;ORF_type:complete_(-),score=39.25	0	-	2174	3329	0	1	3629	0	No
TRINITY_DN39_c0_g2_i1	.	+	TRINITY_DN39_c0_g1_i7	0	3629	ID=TRINITY_DN39_c0_g1_i7.p2;TRINITY_DN39_c0_g1~~TRINITY_DN39_c0_g1_i7.p2;ORF_type:complete_(-),score=14.94	0	-	68	458	0	1	3629	0	No
TRINITY_DN39_c1_g1_i1	.	+	TRINITY_DN3120_c0_g1_i3	0	1007	ID=TRINITY_DN3120_c0_g1_i3.p1;TRINITY_DN3120_c0_g1~~TRINITY_DN3120_c0_g1_i3.p1;ORF_type:3prime_partial_(-),score=32.84	0	-	2	911	0	1	1007	0	Yes
TRINITY_DN39_c1_g1_i1	.	+	TRINITY_DN3120_c0_g1_i2	0	1258	ID=TRINITY_DN3120_c0_g1_i2.p1;TRINITY_DN3120_c0_g1~~TRINITY_DN3120_c0_g1_i2.p1;ORF_type:complete_(-),score=7.49	0	-	577	1162	0	1	1258	0	Yes
TRINITY_DN39_c1_g1_i1	.	+	TRINITY_DN3120_c0_g1_i1	0	1166	ID=TRINITY_DN3120_c0_g1_i1.p1;TRINITY_DN3120_c0_g1~~TRINITY_DN3120_c0_g1_i1.p1;ORF_type:complete_(-),score=7.49	0	-	485	1070	0	1	1166	0	Yes
TRINITY_DN67_c0_g2_i1	.	+	TRINITY_DN67_c0_g1_i2	0	1106	ID=TRINITY_DN67_c0_g1_i2.p1;TRINITY_DN67_c0_g1~~TRINITY_DN67_c0_g1_i2.p1;ORF_type:5prime_partial_(-),score=12.63	0	-	772	1105	0	1	1106	0	No
TRINITY_DN67_c0_g2_i1	.	+	TRINITY_DN67_c0_g1_i1	0	1820	ID=TRINITY_DN67_c0_g1_i1.p1;TRINITY_DN67_c0_g1~~TRINITY_DN67_c0_g1_i1.p1;ORF_type:5prime_partial_(-),score=5.23	0	-	1462	1819	0	1	1820	0	No
TRINITY_DN4_c3_g1_i1	.	-	TRINITY_DN4351_c0_g1_i19	0	1221	ID=TRINITY_DN4351_c0_g1_i19.p1;TRINITY_DN4351_c0_g1~~TRINITY_DN4351_c0_g1_i19.p1;ORF_type:5prime_partial_(-),score=27.29	0	-	622	1219	0	1	1221	0	No
TRINITY_DN4_c3_g1_i1	.	-	TRINITY_DN4351_c0_g1_i13	0	1220	ID=TRINITY_DN4351_c0_g1_i13.p2;TRINITY_DN4351_c0_g1~~TRINITY_DN4351_c0_g1_i13.p2;ORF_type:complete_(+),score=21.44	0	+	274	649	0	1	1220	0	No
TRINITY_DN4_c3_g1_i1	.	-	TRINITY_DN4351_c0_g1_i13	0	1220	ID=TRINITY_DN4351_c0_g1_i13.p1;TRINITY_DN4351_c0_g1~~TRINITY_DN4351_c0_g1_i13.p1;ORF_type:5prime_partial_(-),score=27.29	0	-	621	1218	0	1	1220	0	No
TRINITY_DN24_c1_g1_i1	.	+	TRINITY_DN24_c1_g1_i24	0	759	ID=TRINITY_DN24_c1_g1_i24.p1;TRINITY_DN24_c1_g1~~TRINITY_DN24_c1_g1_i24.p1;ORF_type:complete_(+),score=38.17	0	+	77	698	0	1	759	0	No
TRINITY_DN24_c1_g1_i1	.	+	TRINITY_DN24_c1_g1_i25	0	1627	ID=TRINITY_DN24_c1_g1_i25.p1;TRINITY_DN24_c1_g1~~TRINITY_DN24_c1_g1_i25.p1;ORF_type:complete_(+),score=45.40	0	+	77	878	0	1	1627	0	No
TRINITY_DN24_c1_g1_i1	.	+	TRINITY_DN24_c1_g1_i23	0	1408	ID=TRINITY_DN24_c1_g1_i23.p1;TRINITY_DN24_c1_g1~~TRINITY_DN24_c1_g1_i23.p1;ORF_type:5prime_partial_(+),score=24.72	0	+	2	659	0	1	1408	0	No
TRINITY_DN24_c20_g1_i1	.	-	TRINITY_DN9549_c0_g1_i9	0	717	ID=TRINITY_DN9549_c0_g1_i9.p1;TRINITY_DN9549_c0_g1~~TRINITY_DN9549_c0_g1_i9.p1;ORF_type:complete_(-),score=6.88	0	-	100	421	0	1	717	0	No
TRINITY_DN24_c20_g1_i1	.	-	TRINITY_DN9549_c0_g1_i16	0	669	ID=TRINITY_DN9549_c0_g1_i16.p1;TRINITY_DN9549_c0_g1~~TRINITY_DN9549_c0_g1_i16.p1;ORF_type:complete_(-),score=3.43	0	-	52	373	0	1	669	0	No
TRINITY_DN24_c47_g1_i1	.	+	TRINITY_DN5225_c2_g1_i3	0	933	ID=TRINITY_DN5225_c2_g1_i3.p1;TRINITY_DN5225_c2_g1~~TRINITY_DN5225_c2_g1_i3.p1;ORF_type:complete_(+),score=37.75	0	+	312	870	0	1	933	0	No
TRINITY_DN24_c47_g1_i1	.	+	TRINITY_DN5225_c2_g1_i1	0	2626	ID=TRINITY_DN5225_c2_g1_i1.p1;TRINITY_DN5225_c2_g1~~TRINITY_DN5225_c2_g1_i1.p1;ORF_type:complete_(+),score=53.68	0	+	986	1937	0	1	2626	0	No
TRINITY_DN24_c47_g1_i1	.	+	TRINITY_DN5225_c2_g1_i1	0	2626	ID=TRINITY_DN5225_c2_g1_i1.p2;TRINITY_DN5225_c2_g1~~TRINITY_DN5225_c2_g1_i1.p2;ORF_type:complete_(+),score=37.41	0	+	312	924	0	1	2626	0	No
TRINITY_DN24_c47_g1_i1	.	+	TRINITY_DN5225_c2_g1_i2	0	2564	ID=TRINITY_DN5225_c2_g1_i2.p1;TRINITY_DN5225_c2_g1~~TRINITY_DN5225_c2_g1_i2.p1;ORF_type:complete_(+),score=97.40	0	+	312	1875	0	1	2564	0	No
TRINITY_DN24_c51_g1_i1	.	-	TRINITY_DN22716_c0_g1_i2	0	1181	ID=TRINITY_DN22716_c0_g1_i2.p1;TRINITY_DN22716_c0_g1~~TRINITY_DN22716_c0_g1_i2.p1;ORF_type:complete_(-),score=30.46	0	-	438	981	0	1	1181	0	No
TRINITY_DN24_c51_g1_i1	.	-	TRINITY_DN22716_c0_g1_i1	0	1119	ID=TRINITY_DN22716_c0_g1_i1.p1;TRINITY_DN22716_c0_g1~~TRINITY_DN22716_c0_g1_i1.p1;ORF_type:complete_(-),score=8.34	0	-	438	750	0	1	1119	0	No
TRINITY_DN24_c106_g1_i1	.	+	TRINITY_DN61588_c0_g1_i1	0	1435	ID=TRINITY_DN61588_c0_g1_i1.p1;TRINITY_DN61588_c0_g1~~TRINITY_DN61588_c0_g1_i1.p1;ORF_type:5prime_partial_(+),score=35.32	0	+	2	1346	0	1	1435	0	No
TRINITY_DN24_c144_g1_i1	.	-	TRINITY_DN117577_c0_g1_i1	0	1865	ID=TRINITY_DN117577_c0_g1_i1.p1;TRINITY_DN117577_c0_g1~~TRINITY_DN117577_c0_g1_i1.p1;ORF_type:complete_(+),score=50.44	0	+	182	977	0	1	1865	0	No
TRINITY_DN2_c1_g1_i5	.	+	TRINITY_DN3246_c0_g1_i2	0	2651	ID=TRINITY_DN3246_c0_g1_i2.p1;TRINITY_DN3246_c0_g1~~TRINITY_DN3246_c0_g1_i2.p1;ORF_type:complete_(+),score=50.42	0	+	90	891	0	1	2651	0	No
TRINITY_DN2_c1_g1_i5	.	+	TRINITY_DN3246_c0_g1_i2	0	2651	ID=TRINITY_DN3246_c0_g1_i2.p3;TRINITY_DN3246_c0_g1~~TRINITY_DN3246_c0_g1_i2.p3;ORF_type:complete_(+),score=11.94	0	+	1623	1923	0	1	2651	0	No
TRINITY_DN2_c1_g1_i5	.	+	TRINITY_DN3246_c0_g1_i2	0	2651	ID=TRINITY_DN3246_c0_g1_i2.p2;TRINITY_DN3246_c0_g1~~TRINITY_DN3246_c0_g1_i2.p2;ORF_type:complete_(+),score=42.55	0	+	1108	1627	0	1	2651	0	No
TRINITY_DN2_c1_g1_i5	.	+	TRINITY_DN3246_c0_g1_i1	0	2443	ID=TRINITY_DN3246_c0_g1_i1.p1;TRINITY_DN3246_c0_g1~~TRINITY_DN3246_c0_g1_i1.p1;ORF_type:complete_(+),score=94.43	0	+	90	1419	0	1	2443	0	No
TRINITY_DN2_c1_g1_i5	.	+	TRINITY_DN3246_c0_g1_i1	0	2443	ID=TRINITY_DN3246_c0_g1_i1.p2;TRINITY_DN3246_c0_g1~~TRINITY_DN3246_c0_g1_i1.p2;ORF_type:complete_(+),score=11.94	0	+	1415	1715	0	1	2443	0	No
TRINITY_DN12_c0_g2_i1	.	+	TRINITY_DN217_c0_g1_i1	0	1676	ID=TRINITY_DN217_c0_g1_i1.p2;TRINITY_DN217_c0_g1~~TRINITY_DN217_c0_g1_i1.p2;ORF_type:complete_(+),score=7.49	0	+	1285	1627	0	1	1676	0	Yes
TRINITY_DN12_c0_g2_i1	.	-	TRINITY_DN4613_c0_g1_i4	0	2638	ID=TRINITY_DN4613_c0_g1_i4.p1;TRINITY_DN4613_c0_g1~~TRINITY_DN4613_c0_g1_i4.p1;ORF_type:complete_(+),score=81.43	0	+	988	2014	0	1	2638	0	Yes
TRINITY_DN12_c0_g2_i1	.	-	TRINITY_DN4613_c0_g1_i1	0	2355	ID=TRINITY_DN4613_c0_g1_i1.p1;TRINITY_DN4613_c0_g1~~TRINITY_DN4613_c0_g1_i1.p1;ORF_type:complete_(+),score=115.86	0	+	282	1731	0	1	2355	0	Yes
TRINITY_DN12_c0_g2_i1	.	-	TRINITY_DN5728_c0_g1_i4	0	1747	ID=TRINITY_DN5728_c0_g1_i4.p1;TRINITY_DN5728_c0_g1~~TRINITY_DN5728_c0_g1_i4.p1;ORF_type:5prime_partial_(-),score=39.15	0	-	945	1746	0	1	1747	0	Yes
TRINITY_DN12_c0_g2_i1	.	+	TRINITY_DN646_c2_g2_i1	0	919	ID=TRINITY_DN646_c2_g2_i1.p1;TRINITY_DN646_c2_g2~~TRINITY_DN646_c2_g2_i1.p1;ORF_type:complete_(+),score=16.12	0	+	164	521	0	1	919	0	Yes
TRINITY_DN12_c0_g2_i1	.	+	TRINITY_DN11171_c0_g2_i2	0	2336	ID=TRINITY_DN11171_c0_g2_i2.p1;TRINITY_DN11171_c0_g2~~TRINITY_DN11171_c0_g2_i2.p1;ORF_type:complete_(-),score=44.93	0	-	679	1588	0	1	2336	0	Yes
TRINITY_DN12_c0_g2_i1	.	+	TRINITY_DN11171_c0_g2_i1	0	1737	ID=TRINITY_DN11171_c0_g2_i1.p1;TRINITY_DN11171_c0_g2~~TRINITY_DN11171_c0_g2_i1.p1;ORF_type:complete_(-),score=44.93	0	-	679	1588	0	1	1737	0	Yes
TRINITY_DN12_c0_g2_i1	.	-	TRINITY_DN5427_c0_g2_i2	0	2816	ID=TRINITY_DN5427_c0_g2_i2.p1;TRINITY_DN5427_c0_g2~~TRINITY_DN5427_c0_g2_i2.p1;ORF_type:complete_(-),score=35.58	0	-	444	1236	0	1	2816	0	Yes
TRINITY_DN12_c0_g2_i1	.	-	TRINITY_DN5427_c0_g2_i1	0	1864	ID=TRINITY_DN5427_c0_g2_i1.p1;TRINITY_DN5427_c0_g2~~TRINITY_DN5427_c0_g2_i1.p1;ORF_type:5prime_partial_(-),score=74.74	0	-	444	1863	0	1	1864	0	Yes
TRINITY_DN12_c2_g1_i162	.	+	TRINITY_DN12_c2_g1_i73	0	2237	ID=TRINITY_DN12_c2_g1_i73.p1;TRINITY_DN12_c2_g1~~TRINITY_DN12_c2_g1_i73.p1;ORF_type:complete_(+),score=19.08	0	+	260	707	0	1	2237	0	No
TRINITY_DN12_c2_g1_i162	.	+	TRINITY_DN12_c2_g1_i61	0	1604	ID=TRINITY_DN12_c2_g1_i61.p2;TRINITY_DN12_c2_g1~~TRINITY_DN12_c2_g1_i61.p2;ORF_type:complete_(+),score=24.12	0	+	260	629	0	1	1604	0	No
TRINITY_DN12_c2_g1_i162	.	+	TRINITY_DN12_c2_g1_i61	0	1604	ID=TRINITY_DN12_c2_g1_i61.p1;TRINITY_DN12_c2_g1~~TRINITY_DN12_c2_g1_i61.p1;ORF_type:complete_(+),score=31.19	0	+	871	1561	0	1	1604	0	No
TRINITY_DN12_c2_g1_i162	.	+	TRINITY_DN12_c2_g1_i172	0	4355	ID=TRINITY_DN12_c2_g1_i172.p2;TRINITY_DN12_c2_g1~~TRINITY_DN12_c2_g1_i172.p2;ORF_type:complete_(+),score=18.03	0	+	3675	4086	0	1	4355	0	No
TRINITY_DN12_c2_g1_i162	.	+	TRINITY_DN12_c2_g1_i172	0	4355	ID=TRINITY_DN12_c2_g1_i172.p3;TRINITY_DN12_c2_g1~~TRINITY_DN12_c2_g1_i172.p3;ORF_type:complete_(+),score=24.12	0	+	260	629	0	1	4355	0	No
TRINITY_DN12_c2_g1_i162	.	+	TRINITY_DN12_c2_g1_i172	0	4355	ID=TRINITY_DN12_c2_g1_i172.p1;TRINITY_DN12_c2_g1~~TRINITY_DN12_c2_g1_i172.p1;ORF_type:complete_(+),score=30.51	0	+	1115	1718	0	1	4355	0	No
TRINITY_DN12_c2_g1_i162	.	+	TRINITY_DN12_c2_g1_i166	0	1688	ID=TRINITY_DN12_c2_g1_i166.p1;TRINITY_DN12_c2_g1~~TRINITY_DN12_c2_g1_i166.p1;ORF_type:complete_(+),score=24.12	0	+	260	629	0	1	1688	0	No
TRINITY_DN12_c2_g1_i162	.	+	TRINITY_DN12_c2_g1_i166	0	1688	ID=TRINITY_DN12_c2_g1_i166.p2;TRINITY_DN12_c2_g1~~TRINITY_DN12_c2_g1_i166.p2;ORF_type:complete_(-),score=10.37	0	-	1004	1304	0	1	1688	0	No
TRINITY_DN12_c2_g1_i162	.	+	TRINITY_DN12_c2_g1_i151	0	2092	ID=TRINITY_DN12_c2_g1_i151.p1;TRINITY_DN12_c2_g1~~TRINITY_DN12_c2_g1_i151.p1;ORF_type:complete_(+),score=68.73	0	+	260	1535	0	1	2092	0	No
TRINITY_DN12_c2_g1_i162	.	+	TRINITY_DN12_c2_g1_i144	0	4343	ID=TRINITY_DN12_c2_g1_i144.p1;TRINITY_DN12_c2_g1~~TRINITY_DN12_c2_g1_i144.p1;ORF_type:complete_(+),score=18.03	0	+	3663	4074	0	1	4343	0	No
TRINITY_DN12_c2_g1_i162	.	+	TRINITY_DN12_c2_g1_i144	0	4343	ID=TRINITY_DN12_c2_g1_i144.p3;TRINITY_DN12_c2_g1~~TRINITY_DN12_c2_g1_i144.p3;ORF_type:complete_(-),score=10.37	0	-	909	1209	0	1	4343	0	No
TRINITY_DN12_c2_g1_i162	.	+	TRINITY_DN12_c2_g1_i144	0	4343	ID=TRINITY_DN12_c2_g1_i144.p2;TRINITY_DN12_c2_g1~~TRINITY_DN12_c2_g1_i144.p2;ORF_type:complete_(+),score=24.12	0	+	260	629	0	1	4343	0	No
TRINITY_DN12_c2_g1_i162	.	+	TRINITY_DN12_c2_g1_i143	0	1618	ID=TRINITY_DN12_c2_g1_i143.p1;TRINITY_DN12_c2_g1~~TRINITY_DN12_c2_g1_i143.p1;ORF_type:complete_(-),score=10.37	0	-	934	1234	0	1	1618	0	No
TRINITY_DN12_c2_g1_i162	.	+	TRINITY_DN12_c2_g1_i122	0	4551	ID=TRINITY_DN12_c2_g1_i122.p1;TRINITY_DN12_c2_g1~~TRINITY_DN12_c2_g1_i122.p1;ORF_type:complete_(+),score=18.03	0	+	3871	4282	0	1	4551	0	No
TRINITY_DN12_c2_g1_i162	.	+	TRINITY_DN12_c2_g1_i122	0	4551	ID=TRINITY_DN12_c2_g1_i122.p2;TRINITY_DN12_c2_g1~~TRINITY_DN12_c2_g1_i122.p2;ORF_type:complete_(+),score=24.12	0	+	260	629	0	1	4551	0	No
TRINITY_DN12_c2_g1_i162	.	+	TRINITY_DN12_c2_g1_i120	0	4263	ID=TRINITY_DN12_c2_g1_i120.p2;TRINITY_DN12_c2_g1~~TRINITY_DN12_c2_g1_i120.p2;ORF_type:complete_(+),score=18.03	0	+	3583	3994	0	1	4263	0	No
TRINITY_DN12_c2_g1_i162	.	+	TRINITY_DN12_c2_g1_i120	0	4263	ID=TRINITY_DN12_c2_g1_i120.p1;TRINITY_DN12_c2_g1~~TRINITY_DN12_c2_g1_i120.p1;ORF_type:complete_(+),score=68.73	0	+	260	1535	0	1	4263	0	No
TRINITY_DN12_c2_g1_i162	.	+	TRINITY_DN12_c2_g1_i11	0	4172	ID=TRINITY_DN12_c2_g1_i11.p2;TRINITY_DN12_c2_g1~~TRINITY_DN12_c2_g1_i11.p2;ORF_type:complete_(+),score=18.03	0	+	3492	3903	0	1	4172	0	No
TRINITY_DN12_c2_g1_i162	.	+	TRINITY_DN12_c2_g1_i11	0	4172	ID=TRINITY_DN12_c2_g1_i11.p1;TRINITY_DN12_c2_g1~~TRINITY_DN12_c2_g1_i11.p1;ORF_type:complete_(+),score=68.73	0	+	260	1535	0	1	4172	0	No
TRINITY_DN12_c2_g1_i33	.	+	TRINITY_DN12_c2_g1_i61	0	1604	ID=TRINITY_DN12_c2_g1_i61.p2;TRINITY_DN12_c2_g1~~TRINITY_DN12_c2_g1_i61.p2;ORF_type:complete_(+),score=24.12	0	+	260	629	0	1	1604	0	No
TRINITY_DN12_c2_g1_i33	.	+	TRINITY_DN12_c2_g1_i61	0	1604	ID=TRINITY_DN12_c2_g1_i61.p1;TRINITY_DN12_c2_g1~~TRINITY_DN12_c2_g1_i61.p1;ORF_type:complete_(+),score=31.19	0	+	871	1561	0	1	1604	0	No
TRINITY_DN12_c2_g1_i33	.	+	TRINITY_DN12_c2_g1_i166	0	1688	ID=TRINITY_DN12_c2_g1_i166.p1;TRINITY_DN12_c2_g1~~TRINITY_DN12_c2_g1_i166.p1;ORF_type:complete_(+),score=24.12	0	+	260	629	0	1	1688	0	No
TRINITY_DN12_c2_g1_i33	.	+	TRINITY_DN12_c2_g1_i166	0	1688	ID=TRINITY_DN12_c2_g1_i166.p2;TRINITY_DN12_c2_g1~~TRINITY_DN12_c2_g1_i166.p2;ORF_type:complete_(-),score=10.37	0	-	1004	1304	0	1	1688	0	No
TRINITY_DN12_c2_g1_i33	.	+	TRINITY_DN12_c2_g1_i143	0	1618	ID=TRINITY_DN12_c2_g1_i143.p1;TRINITY_DN12_c2_g1~~TRINITY_DN12_c2_g1_i143.p1;ORF_type:complete_(-),score=10.37	0	-	934	1234	0	1	1618	0	No
TRINITY_DN12_c2_g1_i33	.	+	TRINITY_DN12_c2_g1_i59	0	350	ID=TRINITY_DN12_c2_g1_i59.p1;TRINITY_DN12_c2_g1~~TRINITY_DN12_c2_g1_i59.p1;ORF_type:5prime_partial_(+),score=20.44	0	+	0	345	0	1	350	0	No
TRINITY_DN12_c2_g1_i33	.	+	TRINITY_DN12_c2_g1_i73	0	2237	ID=TRINITY_DN12_c2_g1_i73.p1;TRINITY_DN12_c2_g1~~TRINITY_DN12_c2_g1_i73.p1;ORF_type:complete_(+),score=19.08	0	+	260	707	0	1	2237	0	No
TRINITY_DN12_c2_g1_i33	.	+	TRINITY_DN12_c2_g1_i172	0	4355	ID=TRINITY_DN12_c2_g1_i172.p2;TRINITY_DN12_c2_g1~~TRINITY_DN12_c2_g1_i172.p2;ORF_type:complete_(+),score=18.03	0	+	3675	4086	0	1	4355	0	No
TRINITY_DN12_c2_g1_i33	.	+	TRINITY_DN12_c2_g1_i172	0	4355	ID=TRINITY_DN12_c2_g1_i172.p3;TRINITY_DN12_c2_g1~~TRINITY_DN12_c2_g1_i172.p3;ORF_type:complete_(+),score=24.12	0	+	260	629	0	1	4355	0	No
TRINITY_DN12_c2_g1_i33	.	+	TRINITY_DN12_c2_g1_i172	0	4355	ID=TRINITY_DN12_c2_g1_i172.p1;TRINITY_DN12_c2_g1~~TRINITY_DN12_c2_g1_i172.p1;ORF_type:complete_(+),score=30.51	0	+	1115	1718	0	1	4355	0	No
TRINITY_DN12_c2_g1_i33	.	+	TRINITY_DN12_c2_g1_i151	0	2092	ID=TRINITY_DN12_c2_g1_i151.p1;TRINITY_DN12_c2_g1~~TRINITY_DN12_c2_g1_i151.p1;ORF_type:complete_(+),score=68.73	0	+	260	1535	0	1	2092	0	No
TRINITY_DN12_c2_g1_i33	.	+	TRINITY_DN12_c2_g1_i144	0	4343	ID=TRINITY_DN12_c2_g1_i144.p1;TRINITY_DN12_c2_g1~~TRINITY_DN12_c2_g1_i144.p1;ORF_type:complete_(+),score=18.03	0	+	3663	4074	0	1	4343	0	No
TRINITY_DN12_c2_g1_i33	.	+	TRINITY_DN12_c2_g1_i144	0	4343	ID=TRINITY_DN12_c2_g1_i144.p3;TRINITY_DN12_c2_g1~~TRINITY_DN12_c2_g1_i144.p3;ORF_type:complete_(-),score=10.37	0	-	909	1209	0	1	4343	0	No
TRINITY_DN12_c2_g1_i33	.	+	TRINITY_DN12_c2_g1_i144	0	4343	ID=TRINITY_DN12_c2_g1_i144.p2;TRINITY_DN12_c2_g1~~TRINITY_DN12_c2_g1_i144.p2;ORF_type:complete_(+),score=24.12	0	+	260	629	0	1	4343	0	No
TRINITY_DN12_c2_g1_i33	.	+	TRINITY_DN12_c2_g1_i122	0	4551	ID=TRINITY_DN12_c2_g1_i122.p1;TRINITY_DN12_c2_g1~~TRINITY_DN12_c2_g1_i122.p1;ORF_type:complete_(+),score=18.03	0	+	3871	4282	0	1	4551	0	No
TRINITY_DN12_c2_g1_i33	.	+	TRINITY_DN12_c2_g1_i122	0	4551	ID=TRINITY_DN12_c2_g1_i122.p2;TRINITY_DN12_c2_g1~~TRINITY_DN12_c2_g1_i122.p2;ORF_type:complete_(+),score=24.12	0	+	260	629	0	1	4551	0	No
TRINITY_DN12_c2_g1_i33	.	+	TRINITY_DN12_c2_g1_i120	0	4263	ID=TRINITY_DN12_c2_g1_i120.p2;TRINITY_DN12_c2_g1~~TRINITY_DN12_c2_g1_i120.p2;ORF_type:complete_(+),score=18.03	0	+	3583	3994	0	1	4263	0	No
TRINITY_DN12_c2_g1_i33	.	+	TRINITY_DN12_c2_g1_i120	0	4263	ID=TRINITY_DN12_c2_g1_i120.p1;TRINITY_DN12_c2_g1~~TRINITY_DN12_c2_g1_i120.p1;ORF_type:complete_(+),score=68.73	0	+	260	1535	0	1	4263	0	No
TRINITY_DN12_c2_g1_i33	.	+	TRINITY_DN12_c2_g1_i11	0	4172	ID=TRINITY_DN12_c2_g1_i11.p2;TRINITY_DN12_c2_g1~~TRINITY_DN12_c2_g1_i11.p2;ORF_type:complete_(+),score=18.03	0	+	3492	3903	0	1	4172	0	No
TRINITY_DN12_c2_g1_i33	.	+	TRINITY_DN12_c2_g1_i11	0	4172	ID=TRINITY_DN12_c2_g1_i11.p1;TRINITY_DN12_c2_g1~~TRINITY_DN12_c2_g1_i11.p1;ORF_type:complete_(+),score=68.73	0	+	260	1535	0	1	4172	0	No
TRINITY_DN12_c2_g1_i37	.	+	TRINITY_DN12_c2_g1_i73	0	2237	ID=TRINITY_DN12_c2_g1_i73.p1;TRINITY_DN12_c2_g1~~TRINITY_DN12_c2_g1_i73.p1;ORF_type:complete_(+),score=19.08	0	+	260	707	0	1	2237	0	No
TRINITY_DN12_c2_g1_i37	.	+	TRINITY_DN12_c2_g1_i61	0	1604	ID=TRINITY_DN12_c2_g1_i61.p2;TRINITY_DN12_c2_g1~~TRINITY_DN12_c2_g1_i61.p2;ORF_type:complete_(+),score=24.12	0	+	260	629	0	1	1604	0	No
TRINITY_DN12_c2_g1_i37	.	+	TRINITY_DN12_c2_g1_i61	0	1604	ID=TRINITY_DN12_c2_g1_i61.p1;TRINITY_DN12_c2_g1~~TRINITY_DN12_c2_g1_i61.p1;ORF_type:complete_(+),score=31.19	0	+	871	1561	0	1	1604	0	No
TRINITY_DN12_c2_g1_i37	.	+	TRINITY_DN12_c2_g1_i172	0	4355	ID=TRINITY_DN12_c2_g1_i172.p2;TRINITY_DN12_c2_g1~~TRINITY_DN12_c2_g1_i172.p2;ORF_type:complete_(+),score=18.03	0	+	3675	4086	0	1	4355	0	No
TRINITY_DN12_c2_g1_i37	.	+	TRINITY_DN12_c2_g1_i172	0	4355	ID=TRINITY_DN12_c2_g1_i172.p3;TRINITY_DN12_c2_g1~~TRINITY_DN12_c2_g1_i172.p3;ORF_type:complete_(+),score=24.12	0	+	260	629	0	1	4355	0	No
TRINITY_DN12_c2_g1_i37	.	+	TRINITY_DN12_c2_g1_i172	0	4355	ID=TRINITY_DN12_c2_g1_i172.p1;TRINITY_DN12_c2_g1~~TRINITY_DN12_c2_g1_i172.p1;ORF_type:complete_(+),score=30.51	0	+	1115	1718	0	1	4355	0	No
TRINITY_DN12_c2_g1_i37	.	+	TRINITY_DN12_c2_g1_i166	0	1688	ID=TRINITY_DN12_c2_g1_i166.p1;TRINITY_DN12_c2_g1~~TRINITY_DN12_c2_g1_i166.p1;ORF_type:complete_(+),score=24.12	0	+	260	629	0	1	1688	0	No
TRINITY_DN12_c2_g1_i37	.	+	TRINITY_DN12_c2_g1_i166	0	1688	ID=TRINITY_DN12_c2_g1_i166.p2;TRINITY_DN12_c2_g1~~TRINITY_DN12_c2_g1_i166.p2;ORF_type:complete_(-),score=10.37	0	-	1004	1304	0	1	1688	0	No
TRINITY_DN12_c2_g1_i37	.	+	TRINITY_DN12_c2_g1_i151	0	2092	ID=TRINITY_DN12_c2_g1_i151.p1;TRINITY_DN12_c2_g1~~TRINITY_DN12_c2_g1_i151.p1;ORF_type:complete_(+),score=68.73	0	+	260	1535	0	1	2092	0	No
TRINITY_DN12_c2_g1_i37	.	+	TRINITY_DN12_c2_g1_i144	0	4343	ID=TRINITY_DN12_c2_g1_i144.p1;TRINITY_DN12_c2_g1~~TRINITY_DN12_c2_g1_i144.p1;ORF_type:complete_(+),score=18.03	0	+	3663	4074	0	1	4343	0	No
TRINITY_DN12_c2_g1_i37	.	+	TRINITY_DN12_c2_g1_i144	0	4343	ID=TRINITY_DN12_c2_g1_i144.p3;TRINITY_DN12_c2_g1~~TRINITY_DN12_c2_g1_i144.p3;ORF_type:complete_(-),score=10.37	0	-	909	1209	0	1	4343	0	No
TRINITY_DN12_c2_g1_i37	.	+	TRINITY_DN12_c2_g1_i144	0	4343	ID=TRINITY_DN12_c2_g1_i144.p2;TRINITY_DN12_c2_g1~~TRINITY_DN12_c2_g1_i144.p2;ORF_type:complete_(+),score=24.12	0	+	260	629	0	1	4343	0	No
TRINITY_DN12_c2_g1_i37	.	+	TRINITY_DN12_c2_g1_i143	0	1618	ID=TRINITY_DN12_c2_g1_i143.p1;TRINITY_DN12_c2_g1~~TRINITY_DN12_c2_g1_i143.p1;ORF_type:complete_(-),score=10.37	0	-	934	1234	0	1	1618	0	No
TRINITY_DN12_c2_g1_i37	.	+	TRINITY_DN12_c2_g1_i122	0	4551	ID=TRINITY_DN12_c2_g1_i122.p1;TRINITY_DN12_c2_g1~~TRINITY_DN12_c2_g1_i122.p1;ORF_type:complete_(+),score=18.03	0	+	3871	4282	0	1	4551	0	No
TRINITY_DN12_c2_g1_i37	.	+	TRINITY_DN12_c2_g1_i122	0	4551	ID=TRINITY_DN12_c2_g1_i122.p2;TRINITY_DN12_c2_g1~~TRINITY_DN12_c2_g1_i122.p2;ORF_type:complete_(+),score=24.12	0	+	260	629	0	1	4551	0	No
TRINITY_DN12_c2_g1_i37	.	+	TRINITY_DN12_c2_g1_i120	0	4263	ID=TRINITY_DN12_c2_g1_i120.p2;TRINITY_DN12_c2_g1~~TRINITY_DN12_c2_g1_i120.p2;ORF_type:complete_(+),score=18.03	0	+	3583	3994	0	1	4263	0	No
TRINITY_DN12_c2_g1_i37	.	+	TRINITY_DN12_c2_g1_i120	0	4263	ID=TRINITY_DN12_c2_g1_i120.p1;TRINITY_DN12_c2_g1~~TRINITY_DN12_c2_g1_i120.p1;ORF_type:complete_(+),score=68.73	0	+	260	1535	0	1	4263	0	No
TRINITY_DN12_c2_g1_i37	.	+	TRINITY_DN12_c2_g1_i11	0	4172	ID=TRINITY_DN12_c2_g1_i11.p2;TRINITY_DN12_c2_g1~~TRINITY_DN12_c2_g1_i11.p2;ORF_type:complete_(+),score=18.03	0	+	3492	3903	0	1	4172	0	No
TRINITY_DN12_c2_g1_i37	.	+	TRINITY_DN12_c2_g1_i11	0	4172	ID=TRINITY_DN12_c2_g1_i11.p1;TRINITY_DN12_c2_g1~~TRINITY_DN12_c2_g1_i11.p1;ORF_type:complete_(+),score=68.73	0	+	260	1535	0	1	4172	0	No
TRINITY_DN12_c2_g1_i37	.	+	TRINITY_DN12_c2_g1_i59	0	350	ID=TRINITY_DN12_c2_g1_i59.p1;TRINITY_DN12_c2_g1~~TRINITY_DN12_c2_g1_i59.p1;ORF_type:5prime_partial_(+),score=20.44	0	+	0	345	0	1	350	0	No
TRINITY_DN12_c2_g1_i59	.	+	TRINITY_DN12_c2_g1_i59	0	350	ID=TRINITY_DN12_c2_g1_i59.p1;TRINITY_DN12_c2_g1~~TRINITY_DN12_c2_g1_i59.p1;ORF_type:5prime_partial_(+),score=20.44	0	+	0	345	0	1	350	0	No
TRINITY_DN12_c2_g1_i59	.	+	TRINITY_DN12_c2_g1_i73	0	2237	ID=TRINITY_DN12_c2_g1_i73.p1;TRINITY_DN12_c2_g1~~TRINITY_DN12_c2_g1_i73.p1;ORF_type:complete_(+),score=19.08	0	+	260	707	0	1	2237	0	No
TRINITY_DN12_c2_g1_i59	.	+	TRINITY_DN12_c2_g1_i172	0	4355	ID=TRINITY_DN12_c2_g1_i172.p2;TRINITY_DN12_c2_g1~~TRINITY_DN12_c2_g1_i172.p2;ORF_type:complete_(+),score=18.03	0	+	3675	4086	0	1	4355	0	No
TRINITY_DN12_c2_g1_i59	.	+	TRINITY_DN12_c2_g1_i172	0	4355	ID=TRINITY_DN12_c2_g1_i172.p3;TRINITY_DN12_c2_g1~~TRINITY_DN12_c2_g1_i172.p3;ORF_type:complete_(+),score=24.12	0	+	260	629	0	1	4355	0	No
TRINITY_DN12_c2_g1_i59	.	+	TRINITY_DN12_c2_g1_i172	0	4355	ID=TRINITY_DN12_c2_g1_i172.p1;TRINITY_DN12_c2_g1~~TRINITY_DN12_c2_g1_i172.p1;ORF_type:complete_(+),score=30.51	0	+	1115	1718	0	1	4355	0	No
TRINITY_DN12_c2_g1_i59	.	+	TRINITY_DN12_c2_g1_i151	0	2092	ID=TRINITY_DN12_c2_g1_i151.p1;TRINITY_DN12_c2_g1~~TRINITY_DN12_c2_g1_i151.p1;ORF_type:complete_(+),score=68.73	0	+	260	1535	0	1	2092	0	No
TRINITY_DN12_c2_g1_i59	.	+	TRINITY_DN12_c2_g1_i144	0	4343	ID=TRINITY_DN12_c2_g1_i144.p1;TRINITY_DN12_c2_g1~~TRINITY_DN12_c2_g1_i144.p1;ORF_type:complete_(+),score=18.03	0	+	3663	4074	0	1	4343	0	No
TRINITY_DN12_c2_g1_i59	.	+	TRINITY_DN12_c2_g1_i144	0	4343	ID=TRINITY_DN12_c2_g1_i144.p3;TRINITY_DN12_c2_g1~~TRINITY_DN12_c2_g1_i144.p3;ORF_type:complete_(-),score=10.37	0	-	909	1209	0	1	4343	0	No
TRINITY_DN12_c2_g1_i59	.	+	TRINITY_DN12_c2_g1_i144	0	4343	ID=TRINITY_DN12_c2_g1_i144.p2;TRINITY_DN12_c2_g1~~TRINITY_DN12_c2_g1_i144.p2;ORF_type:complete_(+),score=24.12	0	+	260	629	0	1	4343	0	No
TRINITY_DN12_c2_g1_i59	.	+	TRINITY_DN12_c2_g1_i122	0	4551	ID=TRINITY_DN12_c2_g1_i122.p1;TRINITY_DN12_c2_g1~~TRINITY_DN12_c2_g1_i122.p1;ORF_type:complete_(+),score=18.03	0	+	3871	4282	0	1	4551	0	No
TRINITY_DN12_c2_g1_i59	.	+	TRINITY_DN12_c2_g1_i122	0	4551	ID=TRINITY_DN12_c2_g1_i122.p2;TRINITY_DN12_c2_g1~~TRINITY_DN12_c2_g1_i122.p2;ORF_type:complete_(+),score=24.12	0	+	260	629	0	1	4551	0	No
TRINITY_DN12_c2_g1_i59	.	+	TRINITY_DN12_c2_g1_i120	0	4263	ID=TRINITY_DN12_c2_g1_i120.p2;TRINITY_DN12_c2_g1~~TRINITY_DN12_c2_g1_i120.p2;ORF_type:complete_(+),score=18.03	0	+	3583	3994	0	1	4263	0	No
TRINITY_DN12_c2_g1_i59	.	+	TRINITY_DN12_c2_g1_i120	0	4263	ID=TRINITY_DN12_c2_g1_i120.p1;TRINITY_DN12_c2_g1~~TRINITY_DN12_c2_g1_i120.p1;ORF_type:complete_(+),score=68.73	0	+	260	1535	0	1	4263	0	No
TRINITY_DN12_c2_g1_i59	.	+	TRINITY_DN12_c2_g1_i11	0	4172	ID=TRINITY_DN12_c2_g1_i11.p2;TRINITY_DN12_c2_g1~~TRINITY_DN12_c2_g1_i11.p2;ORF_type:complete_(+),score=18.03	0	+	3492	3903	0	1	4172	0	No
TRINITY_DN12_c2_g1_i59	.	+	TRINITY_DN12_c2_g1_i11	0	4172	ID=TRINITY_DN12_c2_g1_i11.p1;TRINITY_DN12_c2_g1~~TRINITY_DN12_c2_g1_i11.p1;ORF_type:complete_(+),score=68.73	0	+	260	1535	0	1	4172	0	No
TRINITY_DN12_c2_g1_i59	.	+	TRINITY_DN12_c2_g1_i61	0	1604	ID=TRINITY_DN12_c2_g1_i61.p2;TRINITY_DN12_c2_g1~~TRINITY_DN12_c2_g1_i61.p2;ORF_type:complete_(+),score=24.12	0	+	260	629	0	1	1604	0	No
TRINITY_DN12_c2_g1_i59	.	+	TRINITY_DN12_c2_g1_i61	0	1604	ID=TRINITY_DN12_c2_g1_i61.p1;TRINITY_DN12_c2_g1~~TRINITY_DN12_c2_g1_i61.p1;ORF_type:complete_(+),score=31.19	0	+	871	1561	0	1	1604	0	No
TRINITY_DN12_c2_g1_i59	.	+	TRINITY_DN12_c2_g1_i166	0	1688	ID=TRINITY_DN12_c2_g1_i166.p1;TRINITY_DN12_c2_g1~~TRINITY_DN12_c2_g1_i166.p1;ORF_type:complete_(+),score=24.12	0	+	260	629	0	1	1688	0	No
TRINITY_DN12_c2_g1_i59	.	+	TRINITY_DN12_c2_g1_i166	0	1688	ID=TRINITY_DN12_c2_g1_i166.p2;TRINITY_DN12_c2_g1~~TRINITY_DN12_c2_g1_i166.p2;ORF_type:complete_(-),score=10.37	0	-	1004	1304	0	1	1688	0	No
TRINITY_DN12_c2_g1_i59	.	+	TRINITY_DN12_c2_g1_i143	0	1618	ID=TRINITY_DN12_c2_g1_i143.p1;TRINITY_DN12_c2_g1~~TRINITY_DN12_c2_g1_i143.p1;ORF_type:complete_(-),score=10.37	0	-	934	1234	0	1	1618	0	No
TRINITY_DN12_c2_g1_i84	.	+	TRINITY_DN5690_c2_g1_i1	0	2120	ID=TRINITY_DN5690_c2_g1_i1.p1;TRINITY_DN5690_c2_g1~~TRINITY_DN5690_c2_g1_i1.p1;ORF_type:complete_(-),score=37.84	0	-	1097	2066	0	1	2120	0	No
TRINITY_DN12_c2_g1_i84	.	+	TRINITY_DN3657_c0_g1_i6	0	2543	ID=TRINITY_DN3657_c0_g1_i6.p1;TRINITY_DN3657_c0_g1~~TRINITY_DN3657_c0_g1_i6.p1;ORF_type:complete_(-),score=34.58	0	-	1535	2336	0	1	2543	0	No
TRINITY_DN12_c2_g1_i84	.	-	TRINITY_DN10486_c0_g1_i1	0	1215	ID=TRINITY_DN10486_c0_g1_i1.p1;TRINITY_DN10486_c0_g1~~TRINITY_DN10486_c0_g1_i1.p1;ORF_type:complete_(-),score=31.08	0	-	612	1089	0	1	1215	0	No
TRINITY_DN12_c2_g1_i84	.	-	TRINITY_DN16730_c0_g1_i2	0	3478	ID=TRINITY_DN16730_c0_g1_i2.p1;TRINITY_DN16730_c0_g1~~TRINITY_DN16730_c0_g1_i2.p1;ORF_type:complete_(+),score=47.23	0	+	2271	2934	0	1	3478	0	No
TRINITY_DN12_c2_g1_i84	.	-	TRINITY_DN16730_c0_g1_i2	0	3478	ID=TRINITY_DN16730_c0_g1_i2.p2;TRINITY_DN16730_c0_g1~~TRINITY_DN16730_c0_g1_i2.p2;ORF_type:5prime_partial_(+),score=23.37	0	+	0	612	0	1	3478	0	No
TRINITY_DN12_c4_g1_i1	.	+	TRINITY_DN2172_c0_g1_i37	0	1904	ID=TRINITY_DN2172_c0_g1_i37.p2;TRINITY_DN2172_c0_g1~~TRINITY_DN2172_c0_g1_i37.p2;ORF_type:complete_(-),score=1.96	0	-	627	1008	0	1	1904	0	No
TRINITY_DN12_c4_g1_i1	.	+	TRINITY_DN2172_c0_g1_i37	0	1904	ID=TRINITY_DN2172_c0_g1_i37.p1;TRINITY_DN2172_c0_g1~~TRINITY_DN2172_c0_g1_i37.p1;ORF_type:complete_(-),score=60.90	0	-	1101	1671	0	1	1904	0	No
TRINITY_DN12_c4_g2_i1	.	+	TRINITY_DN11399_c0_g1_i4	0	2444	ID=TRINITY_DN11399_c0_g1_i4.p1;TRINITY_DN11399_c0_g1~~TRINITY_DN11399_c0_g1_i4.p1;ORF_type:complete_(-),score=32.98	0	-	1031	1475	0	1	2444	0	No
TRINITY_DN40_c0_g2_i1	.	-	TRINITY_DN83200_c0_g1_i1	0	429	ID=TRINITY_DN83200_c0_g1_i1.p1;TRINITY_DN83200_c0_g1~~TRINITY_DN83200_c0_g1_i1.p1;ORF_type:complete_(-),score=4.10	0	-	62	362	0	1	429	0	No
TRINITY_DN40_c0_g2_i1	.	-	TRINITY_DN6323_c0_g1_i78	0	2091	ID=TRINITY_DN6323_c0_g1_i78.p2;TRINITY_DN6323_c0_g1~~TRINITY_DN6323_c0_g1_i78.p2;ORF_type:complete_(-),score=18.18	0	-	66	390	0	1	2091	0	No
TRINITY_DN40_c0_g2_i1	.	-	TRINITY_DN6323_c0_g1_i78	0	2091	ID=TRINITY_DN6323_c0_g1_i78.p1;TRINITY_DN6323_c0_g1~~TRINITY_DN6323_c0_g1_i78.p1;ORF_type:complete_(+),score=61.06	0	+	650	1481	0	1	2091	0	No
TRINITY_DN40_c0_g2_i1	.	-	TRINITY_DN6323_c0_g1_i22	0	2174	ID=TRINITY_DN6323_c0_g1_i22.p1;TRINITY_DN6323_c0_g1~~TRINITY_DN6323_c0_g1_i22.p1;ORF_type:complete_(+),score=49.53	0	+	650	1421	0	1	2174	0	No
TRINITY_DN40_c0_g2_i1	.	-	TRINITY_DN6323_c0_g1_i22	0	2174	ID=TRINITY_DN6323_c0_g1_i22.p2;TRINITY_DN6323_c0_g1~~TRINITY_DN6323_c0_g1_i22.p2;ORF_type:complete_(-),score=18.18	0	-	66	390	0	1	2174	0	No
TRINITY_DN40_c0_g2_i1	.	+	TRINITY_DN40_c0_g1_i65	0	4104	ID=TRINITY_DN40_c0_g1_i65.p1;TRINITY_DN40_c0_g1~~TRINITY_DN40_c0_g1_i65.p1;ORF_type:complete_(+),score=65.75	0	+	145	1054	0	1	4104	0	No
TRINITY_DN40_c0_g2_i1	.	+	TRINITY_DN40_c0_g1_i19	0	3496	ID=TRINITY_DN40_c0_g1_i19.p1;TRINITY_DN40_c0_g1~~TRINITY_DN40_c0_g1_i19.p1;ORF_type:complete_(+),score=76.86	0	+	145	1189	0	1	3496	0	No
TRINITY_DN40_c0_g2_i1	.	-	TRINITY_DN20915_c0_g1_i8	0	1880	ID=TRINITY_DN20915_c0_g1_i8.p1;TRINITY_DN20915_c0_g1~~TRINITY_DN20915_c0_g1_i8.p1;ORF_type:complete_(+),score=68.69	0	+	541	1312	0	1	1880	0	No
TRINITY_DN40_c0_g2_i1	.	-	TRINITY_DN18437_c0_g1_i3	0	837	ID=TRINITY_DN18437_c0_g1_i3.p1;TRINITY_DN18437_c0_g1~~TRINITY_DN18437_c0_g1_i3.p1;ORF_type:5prime_partial_(-),score=27.20	0	-	432	837	0	1	837	0	No
TRINITY_DN40_c0_g2_i1	.	-	TRINITY_DN18437_c0_g1_i2	0	935	ID=TRINITY_DN18437_c0_g1_i2.p1;TRINITY_DN18437_c0_g1~~TRINITY_DN18437_c0_g1_i2.p1;ORF_type:5prime_partial_(-),score=27.20	0	-	530	935	0	1	935	0	No
TRINITY_DN94_c1_g1_i5	.	-	TRINITY_DN1078_c0_g1_i2	0	3580	ID=TRINITY_DN1078_c0_g1_i2.p1;TRINITY_DN1078_c0_g1~~TRINITY_DN1078_c0_g1_i2.p1;ORF_type:complete_(+),score=222.80	0	+	645	2916	0	1	3580	0	No
TRINITY_DN94_c1_g1_i5	.	-	TRINITY_DN1078_c0_g1_i9	0	5355	ID=TRINITY_DN1078_c0_g1_i9.p1;TRINITY_DN1078_c0_g1~~TRINITY_DN1078_c0_g1_i9.p1;ORF_type:complete_(+),score=259.24	0	+	1832	4691	0	1	5355	0	No
TRINITY_DN94_c1_g1_i5	.	-	TRINITY_DN1078_c0_g1_i9	0	5355	ID=TRINITY_DN1078_c0_g1_i9.p2;TRINITY_DN1078_c0_g1~~TRINITY_DN1078_c0_g1_i9.p2;ORF_type:complete_(+),score=54.99	0	+	205	1243	0	1	5355	0	No
TRINITY_DN94_c1_g1_i5	.	-	TRINITY_DN1078_c0_g1_i7	0	4631	ID=TRINITY_DN1078_c0_g1_i7.p1;TRINITY_DN1078_c0_g1~~TRINITY_DN1078_c0_g1_i7.p1;ORF_type:complete_(+),score=313.72	0	+	205	3967	0	1	4631	0	No
TRINITY_DN94_c1_g1_i5	.	-	TRINITY_DN1078_c0_g1_i5	0	4972	ID=TRINITY_DN1078_c0_g1_i5.p2;TRINITY_DN1078_c0_g1~~TRINITY_DN1078_c0_g1_i5.p2;ORF_type:complete_(+),score=32.65	0	+	205	907	0	1	4972	0	No
TRINITY_DN94_c1_g1_i5	.	-	TRINITY_DN1078_c0_g1_i5	0	4972	ID=TRINITY_DN1078_c0_g1_i5.p1;TRINITY_DN1078_c0_g1~~TRINITY_DN1078_c0_g1_i5.p1;ORF_type:complete_(+),score=281.95	0	+	1164	4308	0	1	4972	0	No
TRINITY_DN94_c1_g1_i5	.	-	TRINITY_DN1078_c0_g1_i10	0	2148	ID=TRINITY_DN1078_c0_g1_i10.p1;TRINITY_DN1078_c0_g1~~TRINITY_DN1078_c0_g1_i10.p1;ORF_type:complete_(+),score=90.82	0	+	205	1705	0	1	2148	0	No
TRINITY_DN94_c6_g1_i1	.	-	TRINITY_DN6069_c3_g1_i2	0	897	ID=TRINITY_DN6069_c3_g1_i2.p1;TRINITY_DN6069_c3_g1~~TRINITY_DN6069_c3_g1_i2.p1;ORF_type:complete_(-),score=6.01	0	-	278	653	0	1	897	0	No
TRINITY_DN94_c6_g1_i1	.	-	TRINITY_DN6069_c3_g1_i3	0	875	ID=TRINITY_DN6069_c3_g1_i3.p1;TRINITY_DN6069_c3_g1~~TRINITY_DN6069_c3_g1_i3.p1;ORF_type:complete_(-),score=6.01	0	-	256	631	0	1	875	0	No
TRINITY_DN94_c6_g1_i2	.	-	TRINITY_DN6069_c1_g1_i3	0	4864	ID=TRINITY_DN6069_c1_g1_i3.p1;TRINITY_DN6069_c1_g1~~TRINITY_DN6069_c1_g1_i3.p1;ORF_type:complete_(+),score=62.87	0	+	2349	3390	0	1	4864	0	No
TRINITY_DN94_c6_g1_i2	.	-	TRINITY_DN6069_c1_g1_i3	0	4864	ID=TRINITY_DN6069_c1_g1_i3.p2;TRINITY_DN6069_c1_g1~~TRINITY_DN6069_c1_g1_i3.p2;ORF_type:complete_(+),score=53.85	0	+	397	1270	0	1	4864	0	No
TRINITY_DN94_c6_g1_i2	.	-	TRINITY_DN6069_c1_g1_i11	0	3851	ID=TRINITY_DN6069_c1_g1_i11.p1;TRINITY_DN6069_c1_g1~~TRINITY_DN6069_c1_g1_i11.p1;ORF_type:complete_(+),score=125.00	0	+	397	2377	0	1	3851	0	No
TRINITY_DN94_c6_g1_i2	.	-	TRINITY_DN6069_c1_g1_i1	0	3920	ID=TRINITY_DN6069_c1_g1_i1.p1;TRINITY_DN6069_c1_g1~~TRINITY_DN6069_c1_g1_i1.p1;ORF_type:complete_(+),score=122.34	0	+	397	2446	0	1	3920	0	No
TRINITY_DN94_c6_g1_i2	.	-	TRINITY_DN3685_c0_g1_i7	0	2589	ID=TRINITY_DN3685_c0_g1_i7.p1;TRINITY_DN3685_c0_g1~~TRINITY_DN3685_c0_g1_i7.p1;ORF_type:complete_(+),score=28.94	0	+	1394	1904	0	1	2589	0	No
TRINITY_DN94_c6_g1_i2	.	-	TRINITY_DN3685_c0_g1_i6	0	1384	ID=TRINITY_DN3685_c0_g1_i6.p1;TRINITY_DN3685_c0_g1~~TRINITY_DN3685_c0_g1_i6.p1;ORF_type:complete_(+),score=31.32	0	+	75	699	0	1	1384	0	No
TRINITY_DN94_c6_g1_i2	.	-	TRINITY_DN3685_c0_g1_i4	0	1953	ID=TRINITY_DN3685_c0_g1_i4.p1;TRINITY_DN3685_c0_g1~~TRINITY_DN3685_c0_g1_i4.p1;ORF_type:complete_(+),score=28.94	0	+	758	1268	0	1	1953	0	No
TRINITY_DN94_c6_g1_i2	.	-	TRINITY_DN3685_c0_g1_i3	0	2705	ID=TRINITY_DN3685_c0_g1_i3.p1;TRINITY_DN3685_c0_g1~~TRINITY_DN3685_c0_g1_i3.p1;ORF_type:complete_(+),score=28.94	0	+	1510	2020	0	1	2705	0	No
TRINITY_DN94_c6_g1_i2	.	-	TRINITY_DN3685_c0_g1_i2	0	1401	ID=TRINITY_DN3685_c0_g1_i2.p1;TRINITY_DN3685_c0_g1~~TRINITY_DN3685_c0_g1_i2.p1;ORF_type:complete_(+),score=28.93	0	+	161	716	0	1	1401	0	No
TRINITY_DN94_c6_g1_i2	.	-	TRINITY_DN3685_c0_g1_i1	0	1806	ID=TRINITY_DN3685_c0_g1_i1.p1;TRINITY_DN3685_c0_g1~~TRINITY_DN3685_c0_g1_i1.p1;ORF_type:complete_(+),score=28.94	0	+	611	1121	0	1	1806	0	No
TRINITY_DN94_c6_g1_i2	.	-	TRINITY_DN6069_c3_g1_i3	0	875	ID=TRINITY_DN6069_c3_g1_i3.p1;TRINITY_DN6069_c3_g1~~TRINITY_DN6069_c3_g1_i3.p1;ORF_type:complete_(-),score=6.01	0	-	256	631	0	1	875	0	No
TRINITY_DN94_c6_g1_i2	.	-	TRINITY_DN6069_c3_g1_i2	0	897	ID=TRINITY_DN6069_c3_g1_i2.p1;TRINITY_DN6069_c3_g1~~TRINITY_DN6069_c3_g1_i2.p1;ORF_type:complete_(-),score=6.01	0	-	278	653	0	1	897	0	No
TRINITY_DN94_c17_g1_i1	.	-	TRINITY_DN2403_c2_g1_i2	0	2140	ID=TRINITY_DN2403_c2_g1_i2.p1;TRINITY_DN2403_c2_g1~~TRINITY_DN2403_c2_g1_i2.p1;ORF_type:5prime_partial_(+),score=5.15	0	+	2	311	0	1	2140	0	No
TRINITY_DN83_c0_g2_i4	.	+	TRINITY_DN83_c0_g2_i5	0	3527	ID=TRINITY_DN83_c0_g2_i5.p1;TRINITY_DN83_c0_g2~~TRINITY_DN83_c0_g2_i5.p1;ORF_type:3prime_partial_(-),score=95.19	0	-	2	1253	0	1	3527	0	No
TRINITY_DN83_c0_g2_i4	.	+	TRINITY_DN83_c0_g2_i3	0	1714	ID=TRINITY_DN83_c0_g2_i3.p1;TRINITY_DN83_c0_g2~~TRINITY_DN83_c0_g2_i3.p1;ORF_type:3prime_partial_(-),score=93.64	0	-	2	1454	0	1	1714	0	No
TRINITY_DN83_c0_g2_i4	.	+	TRINITY_DN83_c0_g2_i2	0	1779	ID=TRINITY_DN83_c0_g2_i2.p2;TRINITY_DN83_c0_g2~~TRINITY_DN83_c0_g2_i2.p2;ORF_type:complete_(-),score=8.93	0	-	1093	1519	0	1	1779	0	No
TRINITY_DN83_c0_g2_i4	.	+	TRINITY_DN83_c0_g2_i2	0	1779	ID=TRINITY_DN83_c0_g2_i2.p1;TRINITY_DN83_c0_g2~~TRINITY_DN83_c0_g2_i2.p1;ORF_type:3prime_partial_(-),score=65.72	0	-	2	917	0	1	1779	0	No
TRINITY_DN83_c0_g2_i4	.	+	TRINITY_DN83_c0_g1_i8	0	4265	ID=TRINITY_DN83_c0_g1_i8.p1;TRINITY_DN83_c0_g1~~TRINITY_DN83_c0_g1_i8.p1;ORF_type:complete_(-),score=66.00	0	-	1856	2903	0	1	4265	0	No
TRINITY_DN83_c0_g2_i4	.	+	TRINITY_DN83_c0_g1_i8	0	4265	ID=TRINITY_DN83_c0_g1_i8.p2;TRINITY_DN83_c0_g1~~TRINITY_DN83_c0_g1_i8.p2;ORF_type:complete_(+),score=31.87	0	+	46	829	0	1	4265	0	No
TRINITY_DN83_c0_g2_i4	.	+	TRINITY_DN83_c0_g1_i6	0	3556	ID=TRINITY_DN83_c0_g1_i6.p1;TRINITY_DN83_c0_g1~~TRINITY_DN83_c0_g1_i6.p1;ORF_type:complete_(+),score=31.87	0	+	46	829	0	1	3556	0	No
TRINITY_DN83_c0_g2_i4	.	+	TRINITY_DN83_c0_g1_i6	0	3556	ID=TRINITY_DN83_c0_g1_i6.p2;TRINITY_DN83_c0_g1~~TRINITY_DN83_c0_g1_i6.p2;ORF_type:complete_(-),score=49.15	0	-	2848	3484	0	1	3556	0	No
TRINITY_DN83_c0_g2_i4	.	+	TRINITY_DN83_c0_g1_i6	0	3556	ID=TRINITY_DN83_c0_g1_i6.p3;TRINITY_DN83_c0_g1~~TRINITY_DN83_c0_g1_i6.p3;ORF_type:complete_(-),score=37.16	0	-	1856	2408	0	1	3556	0	No
TRINITY_DN83_c0_g2_i4	.	+	TRINITY_DN83_c0_g1_i4	0	2616	ID=TRINITY_DN83_c0_g1_i4.p2;TRINITY_DN83_c0_g1~~TRINITY_DN83_c0_g1_i4.p2;ORF_type:complete_(-),score=15.79	0	-	1856	2183	0	1	2616	0	No
TRINITY_DN83_c0_g2_i4	.	+	TRINITY_DN83_c0_g1_i4	0	2616	ID=TRINITY_DN83_c0_g1_i4.p1;TRINITY_DN83_c0_g1~~TRINITY_DN83_c0_g1_i4.p1;ORF_type:complete_(+),score=31.87	0	+	46	829	0	1	2616	0	No
TRINITY_DN83_c0_g2_i4	.	+	TRINITY_DN83_c0_g1_i2	0	3116	ID=TRINITY_DN83_c0_g1_i2.p2;TRINITY_DN83_c0_g1~~TRINITY_DN83_c0_g1_i2.p2;ORF_type:complete_(+),score=31.87	0	+	46	829	0	1	3116	0	No
TRINITY_DN83_c0_g2_i4	.	+	TRINITY_DN83_c0_g1_i2	0	3116	ID=TRINITY_DN83_c0_g1_i2.p1;TRINITY_DN83_c0_g1~~TRINITY_DN83_c0_g1_i2.p1;ORF_type:complete_(-),score=91.67	0	-	1856	3044	0	1	3116	0	No
TRINITY_DN83_c0_g2_i4	.	+	TRINITY_DN83_c0_g1_i10	0	3770	ID=TRINITY_DN83_c0_g1_i10.p2;TRINITY_DN83_c0_g1~~TRINITY_DN83_c0_g1_i10.p2;ORF_type:complete_(-),score=43.05	0	-	1856	2582	0	1	3770	0	No
TRINITY_DN83_c0_g2_i4	.	+	TRINITY_DN83_c0_g1_i10	0	3770	ID=TRINITY_DN83_c0_g1_i10.p1;TRINITY_DN83_c0_g1~~TRINITY_DN83_c0_g1_i10.p1;ORF_type:complete_(+),score=31.87	0	+	46	829	0	1	3770	0	No
TRINITY_DN83_c0_g2_i4	.	+	TRINITY_DN83_c0_g1_i10	0	3770	ID=TRINITY_DN83_c0_g1_i10.p3;TRINITY_DN83_c0_g1~~TRINITY_DN83_c0_g1_i10.p3;ORF_type:complete_(-),score=49.15	0	-	3062	3698	0	1	3770	0	No
TRINITY_DN98_c3_g1_i1	.	-	TRINITY_DN6897_c0_g1_i3	0	1254	ID=TRINITY_DN6897_c0_g1_i3.p1;TRINITY_DN6897_c0_g1~~TRINITY_DN6897_c0_g1_i3.p1;ORF_type:complete_(+),score=37.34	0	+	388	1006	0	1	1254	0	No
TRINITY_DN93_c2_g1_i1	.	-	TRINITY_DN22963_c0_g1_i3	0	955	ID=TRINITY_DN22963_c0_g1_i3.p1;TRINITY_DN22963_c0_g1~~TRINITY_DN22963_c0_g1_i3.p1;ORF_type:5prime_partial_(-),score=30.34	0	-	282	954	0	1	955	0	No
TRINITY_DN80_c4_g1_i1	.	-	TRINITY_DN11500_c0_g1_i5	0	1692	ID=TRINITY_DN11500_c0_g1_i5.p1;TRINITY_DN11500_c0_g1~~TRINITY_DN11500_c0_g1_i5.p1;ORF_type:complete_(-),score=51.28	0	-	299	1055	0	1	1692	0	No
TRINITY_DN80_c4_g1_i1	.	-	TRINITY_DN11500_c0_g1_i33	0	1780	ID=TRINITY_DN11500_c0_g1_i33.p1;TRINITY_DN11500_c0_g1~~TRINITY_DN11500_c0_g1_i33.p1;ORF_type:complete_(-),score=43.58	0	-	477	1143	0	1	1780	0	No
TRINITY_DN80_c4_g1_i1	.	-	TRINITY_DN11500_c0_g1_i22	0	1692	ID=TRINITY_DN11500_c0_g1_i22.p1;TRINITY_DN11500_c0_g1~~TRINITY_DN11500_c0_g1_i22.p1;ORF_type:complete_(-),score=37.63	0	-	299	1055	0	1	1692	0	No
TRINITY_DN13_c0_g1_i2	.	+	TRINITY_DN8757_c0_g1_i1	0	1395	ID=TRINITY_DN8757_c0_g1_i1.p1;TRINITY_DN8757_c0_g1~~TRINITY_DN8757_c0_g1_i1.p1;ORF_type:complete_(+),score=29.01	0	+	501	921	0	1	1395	0	No
TRINITY_DN13_c0_g1_i2	.	+	TRINITY_DN1502_c0_g1_i2	0	2930	ID=TRINITY_DN1502_c0_g1_i2.p1;TRINITY_DN1502_c0_g1~~TRINITY_DN1502_c0_g1_i2.p1;ORF_type:complete_(+),score=-17.01	0	+	135	741	0	1	2930	0	No
TRINITY_DN13_c0_g1_i2	.	-	TRINITY_DN2_c0_g2_i9	0	10778	ID=TRINITY_DN2_c0_g2_i9.p4;TRINITY_DN2_c0_g2~~TRINITY_DN2_c0_g2_i9.p4;ORF_type:complete_(+),score=17.50	0	+	1278	2286	0	1	10778	0	No
TRINITY_DN13_c0_g1_i2	.	-	TRINITY_DN2_c0_g2_i9	0	10778	ID=TRINITY_DN2_c0_g2_i9.p1;TRINITY_DN2_c0_g2~~TRINITY_DN2_c0_g2_i9.p1;ORF_type:complete_(-),score=37.78	0	-	7973	10226	0	1	10778	0	No
TRINITY_DN13_c0_g1_i2	.	-	TRINITY_DN2_c0_g2_i9	0	10778	ID=TRINITY_DN2_c0_g2_i9.p5;TRINITY_DN2_c0_g2~~TRINITY_DN2_c0_g2_i9.p5;ORF_type:complete_(+),score=68.71	0	+	81	1044	0	1	10778	0	No
TRINITY_DN13_c0_g1_i2	.	-	TRINITY_DN2_c0_g2_i9	0	10778	ID=TRINITY_DN2_c0_g2_i9.p2;TRINITY_DN2_c0_g2~~TRINITY_DN2_c0_g2_i9.p2;ORF_type:complete_(-),score=25.17	0	-	5743	7948	0	1	10778	0	No
TRINITY_DN13_c0_g1_i2	.	-	TRINITY_DN2_c0_g2_i9	0	10778	ID=TRINITY_DN2_c0_g2_i9.p7;TRINITY_DN2_c0_g2~~TRINITY_DN2_c0_g2_i9.p7;ORF_type:complete_(-),score=8.46	0	-	5323	5653	0	1	10778	0	No
TRINITY_DN13_c0_g1_i2	.	-	TRINITY_DN2_c0_g2_i9	0	10778	ID=TRINITY_DN2_c0_g2_i9.p3;TRINITY_DN2_c0_g2~~TRINITY_DN2_c0_g2_i9.p3;ORF_type:complete_(+),score=31.56	0	+	2233	3655	0	1	10778	0	No
TRINITY_DN13_c0_g1_i2	.	-	TRINITY_DN2_c0_g2_i8	0	1567	ID=TRINITY_DN2_c0_g2_i8.p1;TRINITY_DN2_c0_g2~~TRINITY_DN2_c0_g2_i8.p1;ORF_type:complete_(-),score=13.39	0	-	46	1015	0	1	1567	0	No
TRINITY_DN13_c0_g1_i2	.	-	TRINITY_DN2_c0_g2_i5	0	10472	ID=TRINITY_DN2_c0_g2_i5.p5;TRINITY_DN2_c0_g2~~TRINITY_DN2_c0_g2_i5.p5;ORF_type:complete_(-),score=8.46	0	-	5017	5347	0	1	10472	0	No
TRINITY_DN13_c0_g1_i2	.	-	TRINITY_DN2_c0_g2_i5	0	10472	ID=TRINITY_DN2_c0_g2_i5.p1;TRINITY_DN2_c0_g2~~TRINITY_DN2_c0_g2_i5.p1;ORF_type:complete_(-),score=37.78	0	-	7667	9920	0	1	10472	0	No
TRINITY_DN13_c0_g1_i2	.	-	TRINITY_DN2_c0_g2_i5	0	10472	ID=TRINITY_DN2_c0_g2_i5.p2;TRINITY_DN2_c0_g2~~TRINITY_DN2_c0_g2_i5.p2;ORF_type:complete_(-),score=25.17	0	-	5437	7642	0	1	10472	0	No
TRINITY_DN13_c0_g1_i2	.	-	TRINITY_DN2_c0_g2_i5	0	10472	ID=TRINITY_DN2_c0_g2_i5.p4;TRINITY_DN2_c0_g2~~TRINITY_DN2_c0_g2_i5.p4;ORF_type:complete_(+),score=17.63	0	+	918	1980	0	1	10472	0	No
TRINITY_DN13_c0_g1_i2	.	-	TRINITY_DN2_c0_g2_i5	0	10472	ID=TRINITY_DN2_c0_g2_i5.p3;TRINITY_DN2_c0_g2~~TRINITY_DN2_c0_g2_i5.p3;ORF_type:complete_(+),score=31.56	0	+	1927	3349	0	1	10472	0	No
TRINITY_DN13_c0_g1_i2	.	-	TRINITY_DN2_c0_g2_i17	0	10702	ID=TRINITY_DN2_c0_g2_i17.p1;TRINITY_DN2_c0_g2~~TRINITY_DN2_c0_g2_i17.p1;ORF_type:complete_(-),score=37.78	0	-	7897	10150	0	1	10702	0	No
TRINITY_DN13_c0_g1_i2	.	-	TRINITY_DN2_c0_g2_i17	0	10702	ID=TRINITY_DN2_c0_g2_i17.p5;TRINITY_DN2_c0_g2~~TRINITY_DN2_c0_g2_i17.p5;ORF_type:complete_(-),score=8.46	0	-	5247	5577	0	1	10702	0	No
TRINITY_DN13_c0_g1_i2	.	-	TRINITY_DN2_c0_g2_i17	0	10702	ID=TRINITY_DN2_c0_g2_i17.p2;TRINITY_DN2_c0_g2~~TRINITY_DN2_c0_g2_i17.p2;ORF_type:complete_(-),score=25.17	0	-	5667	7872	0	1	10702	0	No
TRINITY_DN13_c0_g1_i2	.	-	TRINITY_DN2_c0_g2_i17	0	10702	ID=TRINITY_DN2_c0_g2_i17.p3;TRINITY_DN2_c0_g2~~TRINITY_DN2_c0_g2_i17.p3;ORF_type:complete_(+),score=31.56	0	+	2157	3579	0	1	10702	0	No
TRINITY_DN13_c0_g1_i2	.	-	TRINITY_DN2_c0_g2_i17	0	10702	ID=TRINITY_DN2_c0_g2_i17.p4;TRINITY_DN2_c0_g2~~TRINITY_DN2_c0_g2_i17.p4;ORF_type:complete_(+),score=17.63	0	+	1148	2210	0	1	10702	0	No
TRINITY_DN13_c0_g1_i2	.	-	TRINITY_DN6907_c0_g1_i7	0	1677	ID=TRINITY_DN6907_c0_g1_i7.p2;TRINITY_DN6907_c0_g1~~TRINITY_DN6907_c0_g1_i7.p2;ORF_type:5prime_partial_(-),score=20.87	0	-	1357	1675	0	1	1677	0	No
TRINITY_DN13_c0_g1_i2	.	-	TRINITY_DN6907_c0_g1_i15	0	1173	ID=TRINITY_DN6907_c0_g1_i15.p2;TRINITY_DN6907_c0_g1~~TRINITY_DN6907_c0_g1_i15.p2;ORF_type:5prime_partial_(-),score=23.86	0	-	853	1171	0	1	1173	0	No
TRINITY_DN13_c0_g1_i2	.	+	TRINITY_DN1502_c0_g1_i5	0	2883	ID=TRINITY_DN1502_c0_g1_i5.p2;TRINITY_DN1502_c0_g1~~TRINITY_DN1502_c0_g1_i5.p2;ORF_type:3prime_partial_(+),score=1.61	0	+	2571	2883	0	1	2883	0	No
TRINITY_DN13_c0_g1_i2	.	+	TRINITY_DN1502_c0_g1_i5	0	2883	ID=TRINITY_DN1502_c0_g1_i5.p1;TRINITY_DN1502_c0_g1~~TRINITY_DN1502_c0_g1_i5.p1;ORF_type:complete_(+),score=-17.01	0	+	135	741	0	1	2883	0	No
TRINITY_DN13_c0_g1_i2	.	+	TRINITY_DN1502_c0_g1_i5	0	2883	ID=TRINITY_DN1502_c0_g1_i5.p2;TRINITY_DN1502_c0_g1~~TRINITY_DN1502_c0_g1_i5.p2;ORF_type:3prime_partial_(+),score=1.61	0	+	2571	2883	0	1	2883	0	No
TRINITY_DN13_c0_g1_i2	.	+	TRINITY_DN1502_c0_g1_i5	0	2883	ID=TRINITY_DN1502_c0_g1_i5.p1;TRINITY_DN1502_c0_g1~~TRINITY_DN1502_c0_g1_i5.p1;ORF_type:complete_(+),score=-17.01	0	+	135	741	0	1	2883	0	No
TRINITY_DN13_c0_g1_i2	.	+	TRINITY_DN1502_c0_g1_i4	0	2291	ID=TRINITY_DN1502_c0_g1_i4.p1;TRINITY_DN1502_c0_g1~~TRINITY_DN1502_c0_g1_i4.p1;ORF_type:3prime_partial_(+),score=1.61	0	+	1979	2291	0	1	2291	0	No
TRINITY_DN13_c0_g1_i2	.	+	TRINITY_DN1502_c0_g1_i4	0	2291	ID=TRINITY_DN1502_c0_g1_i4.p1;TRINITY_DN1502_c0_g1~~TRINITY_DN1502_c0_g1_i4.p1;ORF_type:3prime_partial_(+),score=1.61	0	+	1979	2291	0	1	2291	0	No
TRINITY_DN13_c0_g1_i2	.	+	TRINITY_DN8757_c0_g1_i2	0	942	ID=TRINITY_DN8757_c0_g1_i2.p1;TRINITY_DN8757_c0_g1~~TRINITY_DN8757_c0_g1_i2.p1;ORF_type:complete_(+),score=25.25	0	+	147	468	0	1	942	0	No
TRINITY_DN13_c0_g1_i2	.	-	TRINITY_DN1543_c0_g1_i8	0	1666	ID=TRINITY_DN1543_c0_g1_i8.p1;TRINITY_DN1543_c0_g1~~TRINITY_DN1543_c0_g1_i8.p1;ORF_type:complete_(+),score=76.02	0	+	347	1295	0	1	1666	0	No
TRINITY_DN13_c0_g1_i2	.	+	TRINITY_DN2298_c0_g1_i7	0	2836	ID=TRINITY_DN2298_c0_g1_i7.p1;TRINITY_DN2298_c0_g1~~TRINITY_DN2298_c0_g1_i7.p1;ORF_type:complete_(-),score=94.12	0	-	403	1531	0	1	2836	0	No
TRINITY_DN13_c0_g1_i2	.	+	TRINITY_DN2298_c0_g1_i7	0	2836	ID=TRINITY_DN2298_c0_g1_i7.p2;TRINITY_DN2298_c0_g1~~TRINITY_DN2298_c0_g1_i7.p2;ORF_type:complete_(-),score=1.35	0	-	2100	2460	0	1	2836	0	No
TRINITY_DN13_c0_g1_i2	.	+	TRINITY_DN2298_c0_g1_i1	0	2959	ID=TRINITY_DN2298_c0_g1_i1.p3;TRINITY_DN2298_c0_g1~~TRINITY_DN2298_c0_g1_i1.p3;ORF_type:complete_(-),score=1.35	0	-	2223	2583	0	1	2959	0	No
TRINITY_DN13_c0_g1_i2	.	+	TRINITY_DN2298_c0_g1_i1	0	2959	ID=TRINITY_DN2298_c0_g1_i1.p2;TRINITY_DN2298_c0_g1~~TRINITY_DN2298_c0_g1_i1.p2;ORF_type:complete_(-),score=22.81	0	-	403	766	0	1	2959	0	No
TRINITY_DN13_c0_g1_i2	.	+	TRINITY_DN2298_c0_g1_i1	0	2959	ID=TRINITY_DN2298_c0_g1_i1.p1;TRINITY_DN2298_c0_g1~~TRINITY_DN2298_c0_g1_i1.p1;ORF_type:complete_(-),score=68.58	0	-	922	1654	0	1	2959	0	No
TRINITY_DN51_c2_g3_i1	.	+	TRINITY_DN9640_c0_g1_i26	0	757	ID=TRINITY_DN9640_c0_g1_i26.p1;TRINITY_DN9640_c0_g1~~TRINITY_DN9640_c0_g1_i26.p1;ORF_type:3prime_partial_(+),score=33.86	0	+	342	756	0	1	757	0	No
TRINITY_DN51_c2_g3_i1	.	-	TRINITY_DN121573_c0_g1_i1	0	683	ID=TRINITY_DN121573_c0_g1_i1.p1;TRINITY_DN121573_c0_g1~~TRINITY_DN121573_c0_g1_i1.p1;ORF_type:3prime_partial_(-),score=1.26	0	-	2	323	0	1	683	0	No
TRINITY_DN41_c0_g4_i1	.	+	TRINITY_DN41_c0_g4_i1	0	497	ID=TRINITY_DN41_c0_g4_i1.p1;TRINITY_DN41_c0_g4~~TRINITY_DN41_c0_g4_i1.p1;ORF_type:internal_(-),score=19.65	0	-	0	495	0	1	497	0	No
TRINITY_DN41_c0_g4_i1	.	+	TRINITY_DN41_c0_g4_i1	0	497	ID=TRINITY_DN41_c0_g4_i1.p1;TRINITY_DN41_c0_g4~~TRINITY_DN41_c0_g4_i1.p1;ORF_type:internal_(-),score=19.65	0	-	0	495	0	1	497	0	No
TRINITY_DN41_c0_g4_i1	.	+	TRINITY_DN41_c0_g4_i1	0	497	ID=TRINITY_DN41_c0_g4_i1.p1;TRINITY_DN41_c0_g4~~TRINITY_DN41_c0_g4_i1.p1;ORF_type:internal_(-),score=19.65	0	-	0	495	0	1	497	0	No
TRINITY_DN23_c1_g1_i1	.	-	TRINITY_DN18007_c0_g1_i1	0	2255	ID=TRINITY_DN18007_c0_g1_i1.p1;TRINITY_DN18007_c0_g1~~TRINITY_DN18007_c0_g1_i1.p1;ORF_type:complete_(-),score=18.71	0	-	1593	2085	0	1	2255	0	No
TRINITY_DN23_c1_g1_i1	.	-	TRINITY_DN8868_c0_g2_i9	0	2869	ID=TRINITY_DN8868_c0_g2_i9.p1;TRINITY_DN8868_c0_g2~~TRINITY_DN8868_c0_g2_i9.p1;ORF_type:complete_(-),score=190.06	0	-	167	2759	0	1	2869	0	No
TRINITY_DN23_c1_g1_i1	.	+	TRINITY_DN5192_c0_g1_i4	0	3231	ID=TRINITY_DN5192_c0_g1_i4.p2;TRINITY_DN5192_c0_g1~~TRINITY_DN5192_c0_g1_i4.p2;ORF_type:complete_(+),score=22.73	0	+	169	739	0	1	3231	0	No
TRINITY_DN23_c1_g1_i1	.	+	TRINITY_DN5192_c0_g1_i4	0	3231	ID=TRINITY_DN5192_c0_g1_i4.p1;TRINITY_DN5192_c0_g1~~TRINITY_DN5192_c0_g1_i4.p1;ORF_type:complete_(+),score=18.20	0	+	1198	1891	0	1	3231	0	No
TRINITY_DN23_c1_g1_i1	.	+	TRINITY_DN5192_c0_g1_i16	0	2775	ID=TRINITY_DN5192_c0_g1_i16.p1;TRINITY_DN5192_c0_g1~~TRINITY_DN5192_c0_g1_i16.p1;ORF_type:complete_(+),score=45.58	0	+	169	1435	0	1	2775	0	No
TRINITY_DN23_c1_g1_i1	.	+	TRINITY_DN117769_c0_g1_i1	0	2668	ID=TRINITY_DN117769_c0_g1_i1.p1;TRINITY_DN117769_c0_g1~~TRINITY_DN117769_c0_g1_i1.p1;ORF_type:complete_(-),score=21.78	0	-	757	1192	0	1	2668	0	No
TRINITY_DN23_c1_g2_i1	.	-	TRINITY_DN18022_c0_g1_i1	0	2793	ID=TRINITY_DN18022_c0_g1_i1.p1;TRINITY_DN18022_c0_g1~~TRINITY_DN18022_c0_g1_i1.p1;ORF_type:complete_(-),score=31.94	0	-	529	1237	0	1	2793	0	No
TRINITY_DN23_c1_g2_i1	.	-	TRINITY_DN18022_c0_g1_i1	0	2793	ID=TRINITY_DN18022_c0_g1_i1.p2;TRINITY_DN18022_c0_g1~~TRINITY_DN18022_c0_g1_i1.p2;ORF_type:3prime_partial_(-),score=19.43	0	-	0	354	0	1	2793	0	No
TRINITY_DN23_c3_g1_i1	.	+	TRINITY_DN23_c3_g1_i1	0	453	ID=TRINITY_DN23_c3_g1_i1.p1;TRINITY_DN23_c3_g1~~TRINITY_DN23_c3_g1_i1.p1;ORF_type:internal_(-),score=27.52	0	-	0	453	0	1	453	0	No
TRINITY_DN23_c3_g1_i1	.	-	TRINITY_DN1977_c1_g1_i1	0	641	ID=TRINITY_DN1977_c1_g1_i1.p1;TRINITY_DN1977_c1_g1~~TRINITY_DN1977_c1_g1_i1.p1;ORF_type:3prime_partial_(+),score=36.47	0	+	49	640	0	1	641	0	No
TRINITY_DN23_c3_g1_i1	.	-	TRINITY_DN1031_c2_g1_i5	0	634	ID=TRINITY_DN1031_c2_g1_i5.p1;TRINITY_DN1031_c2_g1~~TRINITY_DN1031_c2_g1_i5.p1;ORF_type:complete_(+),score=22.95	0	+	185	632	0	1	634	0	No
TRINITY_DN23_c3_g1_i1	.	-	TRINITY_DN1031_c2_g1_i4	0	1066	ID=TRINITY_DN1031_c2_g1_i4.p1;TRINITY_DN1031_c2_g1~~TRINITY_DN1031_c2_g1_i4.p1;ORF_type:3prime_partial_(+),score=56.81	0	+	58	1066	0	1	1066	0	No
TRINITY_DN23_c3_g1_i1	.	-	TRINITY_DN1031_c2_g1_i2	0	607	ID=TRINITY_DN1031_c2_g1_i2.p1;TRINITY_DN1031_c2_g1~~TRINITY_DN1031_c2_g1_i2.p1;ORF_type:3prime_partial_(+),score=33.69	0	+	115	607	0	1	607	0	No
TRINITY_DN23_c3_g1_i1	.	-	TRINITY_DN1031_c2_g1_i1	0	924	ID=TRINITY_DN1031_c2_g1_i1.p1;TRINITY_DN1031_c2_g1~~TRINITY_DN1031_c2_g1_i1.p1;ORF_type:complete_(+),score=39.46	0	+	58	922	0	1	924	0	No
TRINITY_DN23_c3_g1_i2	.	+	TRINITY_DN23_c3_g1_i1	0	453	ID=TRINITY_DN23_c3_g1_i1.p1;TRINITY_DN23_c3_g1~~TRINITY_DN23_c3_g1_i1.p1;ORF_type:internal_(-),score=27.52	0	-	0	453	0	1	453	0	No
TRINITY_DN23_c3_g1_i2	.	-	TRINITY_DN1977_c1_g1_i1	0	641	ID=TRINITY_DN1977_c1_g1_i1.p1;TRINITY_DN1977_c1_g1~~TRINITY_DN1977_c1_g1_i1.p1;ORF_type:3prime_partial_(+),score=36.47	0	+	49	640	0	1	641	0	No
TRINITY_DN23_c3_g1_i2	.	-	TRINITY_DN1031_c2_g1_i5	0	634	ID=TRINITY_DN1031_c2_g1_i5.p1;TRINITY_DN1031_c2_g1~~TRINITY_DN1031_c2_g1_i5.p1;ORF_type:complete_(+),score=22.95	0	+	185	632	0	1	634	0	No
TRINITY_DN23_c3_g1_i2	.	-	TRINITY_DN1031_c2_g1_i4	0	1066	ID=TRINITY_DN1031_c2_g1_i4.p1;TRINITY_DN1031_c2_g1~~TRINITY_DN1031_c2_g1_i4.p1;ORF_type:3prime_partial_(+),score=56.81	0	+	58	1066	0	1	1066	0	No
TRINITY_DN23_c3_g1_i2	.	-	TRINITY_DN1031_c2_g1_i2	0	607	ID=TRINITY_DN1031_c2_g1_i2.p1;TRINITY_DN1031_c2_g1~~TRINITY_DN1031_c2_g1_i2.p1;ORF_type:3prime_partial_(+),score=33.69	0	+	115	607	0	1	607	0	No
TRINITY_DN23_c3_g1_i2	.	-	TRINITY_DN1031_c2_g1_i1	0	924	ID=TRINITY_DN1031_c2_g1_i1.p1;TRINITY_DN1031_c2_g1~~TRINITY_DN1031_c2_g1_i1.p1;ORF_type:complete_(+),score=39.46	0	+	58	922	0	1	924	0	No
TRINITY_DN47_c2_g1_i1	.	-	TRINITY_DN10305_c0_g1_i5	0	2291	ID=TRINITY_DN10305_c0_g1_i5.p1;TRINITY_DN10305_c0_g1~~TRINITY_DN10305_c0_g1_i5.p1;ORF_type:complete_(-),score=45.49	0	-	1427	2093	0	1	2291	0	No
TRINITY_DN47_c2_g1_i1	.	-	TRINITY_DN10305_c0_g1_i3	0	3340	ID=TRINITY_DN10305_c0_g1_i3.p1;TRINITY_DN10305_c0_g1~~TRINITY_DN10305_c0_g1_i3.p1;ORF_type:complete_(-),score=45.49	0	-	2476	3142	0	1	3340	0	No
TRINITY_DN47_c2_g1_i1	.	+	TRINITY_DN2933_c0_g1_i5	0	2986	ID=TRINITY_DN2933_c0_g1_i5.p1;TRINITY_DN2933_c0_g1~~TRINITY_DN2933_c0_g1_i5.p1;ORF_type:complete_(+),score=64.48	0	+	143	1001	0	1	2986	0	No
TRINITY_DN47_c2_g1_i1	.	+	TRINITY_DN2933_c0_g1_i5	0	2986	ID=TRINITY_DN2933_c0_g1_i5.p2;TRINITY_DN2933_c0_g1~~TRINITY_DN2933_c0_g1_i5.p2;ORF_type:complete_(+),score=24.32	0	+	1079	1409	0	1	2986	0	No
TRINITY_DN47_c2_g1_i1	.	+	TRINITY_DN2933_c0_g1_i5	0	2986	ID=TRINITY_DN2933_c0_g1_i5.p3;TRINITY_DN2933_c0_g1~~TRINITY_DN2933_c0_g1_i5.p3;ORF_type:3prime_partial_(+),score=1.11	0	+	2664	2985	0	1	2986	0	No
TRINITY_DN47_c2_g1_i1	.	+	TRINITY_DN2933_c0_g1_i32	0	4261	ID=TRINITY_DN2933_c0_g1_i32.p1;TRINITY_DN2933_c0_g1~~TRINITY_DN2933_c0_g1_i32.p1;ORF_type:complete_(+),score=41.98	0	+	1038	1590	0	1	4261	0	No
TRINITY_DN47_c2_g1_i1	.	+	TRINITY_DN2933_c0_g1_i32	0	4261	ID=TRINITY_DN2933_c0_g1_i32.p3;TRINITY_DN2933_c0_g1~~TRINITY_DN2933_c0_g1_i32.p3;ORF_type:complete_(+),score=24.32	0	+	2142	2472	0	1	4261	0	No
TRINITY_DN47_c2_g1_i1	.	+	TRINITY_DN2933_c0_g1_i32	0	4261	ID=TRINITY_DN2933_c0_g1_i32.p2;TRINITY_DN2933_c0_g1~~TRINITY_DN2933_c0_g1_i32.p2;ORF_type:complete_(+),score=22.10	0	+	3015	3504	0	1	4261	0	No
TRINITY_DN47_c2_g1_i1	.	+	TRINITY_DN2933_c0_g1_i32	0	4261	ID=TRINITY_DN2933_c0_g1_i32.p4;TRINITY_DN2933_c0_g1~~TRINITY_DN2933_c0_g1_i32.p4;ORF_type:complete_(-),score=9.25	0	-	3870	4179	0	1	4261	0	No
TRINITY_DN47_c2_g1_i1	.	-	TRINITY_DN8205_c0_g1_i2	0	3803	ID=TRINITY_DN8205_c0_g1_i2.p1;TRINITY_DN8205_c0_g1~~TRINITY_DN8205_c0_g1_i2.p1;ORF_type:complete_(-),score=16.06	0	-	3004	3487	0	1	3803	0	No
TRINITY_DN47_c2_g1_i1	.	-	TRINITY_DN8205_c0_g1_i2	0	3803	ID=TRINITY_DN8205_c0_g1_i2.p2;TRINITY_DN8205_c0_g1~~TRINITY_DN8205_c0_g1_i2.p2;ORF_type:complete_(-),score=4.68	0	-	1263	1683	0	1	3803	0	No
TRINITY_DN47_c2_g1_i1	.	-	TRINITY_DN8205_c0_g1_i2	0	3803	ID=TRINITY_DN8205_c0_g1_i2.p3;TRINITY_DN8205_c0_g1~~TRINITY_DN8205_c0_g1_i2.p3;ORF_type:complete_(-),score=15.73	0	-	772	1087	0	1	3803	0	No
TRINITY_DN47_c2_g1_i1	.	-	TRINITY_DN8205_c0_g1_i1	0	3418	ID=TRINITY_DN8205_c0_g1_i1.p2;TRINITY_DN8205_c0_g1~~TRINITY_DN8205_c0_g1_i1.p2;ORF_type:complete_(-),score=16.06	0	-	2619	3102	0	1	3418	0	No
TRINITY_DN47_c2_g1_i1	.	-	TRINITY_DN8205_c0_g1_i1	0	3418	ID=TRINITY_DN8205_c0_g1_i1.p1;TRINITY_DN8205_c0_g1~~TRINITY_DN8205_c0_g1_i1.p1;ORF_type:complete_(-),score=41.06	0	-	710	1298	0	1	3418	0	No
TRINITY_DN47_c2_g1_i1	.	-	TRINITY_DN2792_c0_g1_i3	0	3888	ID=TRINITY_DN2792_c0_g1_i3.p4;TRINITY_DN2792_c0_g1~~TRINITY_DN2792_c0_g1_i3.p4;ORF_type:complete_(-),score=16.03	0	-	1017	1356	0	1	3888	0	No
TRINITY_DN47_c2_g1_i1	.	-	TRINITY_DN2792_c0_g1_i3	0	3888	ID=TRINITY_DN2792_c0_g1_i3.p3;TRINITY_DN2792_c0_g1~~TRINITY_DN2792_c0_g1_i3.p3;ORF_type:complete_(-),score=0.39	0	-	2068	2443	0	1	3888	0	No
TRINITY_DN47_c2_g1_i1	.	-	TRINITY_DN2792_c0_g1_i3	0	3888	ID=TRINITY_DN2792_c0_g1_i3.p1;TRINITY_DN2792_c0_g1~~TRINITY_DN2792_c0_g1_i3.p1;ORF_type:complete_(-),score=59.71	0	-	2761	3736	0	1	3888	0	No
TRINITY_DN47_c2_g1_i1	.	-	TRINITY_DN2792_c0_g1_i2	0	3969	ID=TRINITY_DN2792_c0_g1_i2.p3;TRINITY_DN2792_c0_g1~~TRINITY_DN2792_c0_g1_i2.p3;ORF_type:complete_(-),score=0.39	0	-	2149	2524	0	1	3969	0	No
TRINITY_DN47_c2_g1_i1	.	-	TRINITY_DN2792_c0_g1_i2	0	3969	ID=TRINITY_DN2792_c0_g1_i2.p1;TRINITY_DN2792_c0_g1~~TRINITY_DN2792_c0_g1_i2.p1;ORF_type:complete_(-),score=59.71	0	-	2842	3817	0	1	3969	0	No
TRINITY_DN47_c2_g1_i1	.	-	TRINITY_DN1613_c1_g2_i2	0	2417	ID=TRINITY_DN1613_c1_g2_i2.p1;TRINITY_DN1613_c1_g2~~TRINITY_DN1613_c1_g2_i2.p1;ORF_type:complete_(-),score=57.98	0	-	751	1480	0	1	2417	0	No
TRINITY_DN47_c2_g1_i1	.	+	TRINITY_DN4193_c0_g2_i25	0	4135	ID=TRINITY_DN4193_c0_g2_i25.p1;TRINITY_DN4193_c0_g2~~TRINITY_DN4193_c0_g2_i25.p1;ORF_type:complete_(+),score=95.72	0	+	52	1306	0	1	4135	0	No
TRINITY_DN47_c2_g1_i1	.	+	TRINITY_DN4193_c0_g2_i25	0	4135	ID=TRINITY_DN4193_c0_g2_i25.p2;TRINITY_DN4193_c0_g2~~TRINITY_DN4193_c0_g2_i25.p2;ORF_type:complete_(+),score=21.52	0	+	2721	3330	0	1	4135	0	No
TRINITY_DN47_c2_g1_i1	.	-	TRINITY_DN5848_c0_g1_i54	0	5604	ID=TRINITY_DN5848_c0_g1_i54.p2;TRINITY_DN5848_c0_g1~~TRINITY_DN5848_c0_g1_i54.p2;ORF_type:3prime_partial_(-),score=10.27	0	-	2	320	0	1	5604	0	No
TRINITY_DN47_c2_g1_i1	.	-	TRINITY_DN5848_c0_g1_i54	0	5604	ID=TRINITY_DN5848_c0_g1_i54.p1;TRINITY_DN5848_c0_g1~~TRINITY_DN5848_c0_g1_i54.p1;ORF_type:complete_(-),score=10.36	0	-	4322	4682	0	1	5604	0	No
TRINITY_DN47_c2_g1_i1	.	-	TRINITY_DN2527_c0_g1_i2	0	2625	ID=TRINITY_DN2527_c0_g1_i2.p1;TRINITY_DN2527_c0_g1~~TRINITY_DN2527_c0_g1_i2.p1;ORF_type:5prime_partial_(-),score=114.56	0	-	1593	2625	0	1	2625	0	No
TRINITY_DN47_c2_g1_i1	.	-	TRINITY_DN2527_c0_g1_i14	0	5126	ID=TRINITY_DN2527_c0_g1_i14.p1;TRINITY_DN2527_c0_g1~~TRINITY_DN2527_c0_g1_i14.p1;ORF_type:complete_(-),score=178.80	0	-	664	2881	0	1	5126	0	No
TRINITY_DN47_c2_g1_i1	.	-	TRINITY_DN2527_c0_g1_i14	0	5126	ID=TRINITY_DN2527_c0_g1_i14.p2;TRINITY_DN2527_c0_g1~~TRINITY_DN2527_c0_g1_i14.p2;ORF_type:5prime_partial_(-),score=114.56	0	-	4094	5126	0	1	5126	0	No
TRINITY_DN47_c2_g1_i1	.	-	TRINITY_DN3678_c0_g1_i27	0	560	ID=TRINITY_DN3678_c0_g1_i27.p1;TRINITY_DN3678_c0_g1~~TRINITY_DN3678_c0_g1_i27.p1;ORF_type:complete_(+),score=24.69	0	+	151	517	0	1	560	0	No
TRINITY_DN47_c2_g1_i1	.	-	TRINITY_DN2666_c0_g1_i5	0	1270	ID=TRINITY_DN2666_c0_g1_i5.p1;TRINITY_DN2666_c0_g1~~TRINITY_DN2666_c0_g1_i5.p1;ORF_type:complete_(-),score=64.54	0	-	128	1103	0	1	1270	0	No
TRINITY_DN47_c2_g1_i1	.	+	TRINITY_DN14446_c4_g1_i1	0	1791	ID=TRINITY_DN14446_c4_g1_i1.p1;TRINITY_DN14446_c4_g1~~TRINITY_DN14446_c4_g1_i1.p1;ORF_type:3prime_partial_(-),score=2.67	0	-	0	303	0	1	1791	0	No
TRINITY_DN47_c2_g1_i1	.	+	TRINITY_DN11235_c0_g1_i91	0	3006	ID=TRINITY_DN11235_c0_g1_i91.p2;TRINITY_DN11235_c0_g1~~TRINITY_DN11235_c0_g1_i91.p2;ORF_type:complete_(+),score=21.84	0	+	1582	1894	0	1	3006	0	No
TRINITY_DN47_c2_g1_i1	.	+	TRINITY_DN11235_c0_g1_i91	0	3006	ID=TRINITY_DN11235_c0_g1_i91.p1;TRINITY_DN11235_c0_g1~~TRINITY_DN11235_c0_g1_i91.p1;ORF_type:5prime_partial_(+),score=24.45	0	+	2	668	0	1	3006	0	No
TRINITY_DN47_c2_g1_i1	.	+	TRINITY_DN11235_c0_g1_i82	0	4043	ID=TRINITY_DN11235_c0_g1_i82.p1;TRINITY_DN11235_c0_g1~~TRINITY_DN11235_c0_g1_i82.p1;ORF_type:complete_(+),score=40.18	0	+	2845	3424	0	1	4043	0	No
TRINITY_DN47_c2_g1_i1	.	+	TRINITY_DN11235_c0_g1_i82	0	4043	ID=TRINITY_DN11235_c0_g1_i82.p2;TRINITY_DN11235_c0_g1~~TRINITY_DN11235_c0_g1_i82.p2;ORF_type:5prime_partial_(+),score=12.70	0	+	2	422	0	1	4043	0	No
TRINITY_DN47_c2_g1_i1	.	+	TRINITY_DN11235_c0_g1_i44	0	4014	ID=TRINITY_DN11235_c0_g1_i44.p1;TRINITY_DN11235_c0_g1~~TRINITY_DN11235_c0_g1_i44.p1;ORF_type:5prime_partial_(+),score=12.70	0	+	2	422	0	1	4014	0	No
TRINITY_DN47_c2_g1_i1	.	-	TRINITY_DN4948_c0_g1_i23	0	5832	ID=TRINITY_DN4948_c0_g1_i23.p1;TRINITY_DN4948_c0_g1~~TRINITY_DN4948_c0_g1_i23.p1;ORF_type:5prime_partial_(-),score=7.57	0	-	5484	5832	0	1	5832	0	No
TRINITY_DN47_c2_g1_i1	.	-	TRINITY_DN4948_c0_g1_i23	0	5832	ID=TRINITY_DN4948_c0_g1_i23.p2;TRINITY_DN4948_c0_g1~~TRINITY_DN4948_c0_g1_i23.p2;ORF_type:complete_(-),score=18.85	0	-	923	1271	0	1	5832	0	No
TRINITY_DN47_c2_g1_i1	.	-	TRINITY_DN4948_c0_g1_i23	0	5832	ID=TRINITY_DN4948_c0_g1_i23.p3;TRINITY_DN4948_c0_g1~~TRINITY_DN4948_c0_g1_i23.p3;ORF_type:complete_(+),score=4.28	0	+	4339	4660	0	1	5832	0	No
TRINITY_DN47_c2_g1_i1	.	+	TRINITY_DN7336_c0_g1_i27	0	1867	ID=TRINITY_DN7336_c0_g1_i27.p1;TRINITY_DN7336_c0_g1~~TRINITY_DN7336_c0_g1_i27.p1;ORF_type:5prime_partial_(+),score=125.33	0	+	2	1475	0	1	1867	0	No
TRINITY_DN47_c2_g1_i1	.	+	TRINITY_DN4505_c2_g1_i7	0	789	ID=TRINITY_DN4505_c2_g1_i7.p1;TRINITY_DN4505_c2_g1~~TRINITY_DN4505_c2_g1_i7.p1;ORF_type:5prime_partial_(+),score=19.66	0	+	2	767	0	1	789	0	No
TRINITY_DN47_c2_g1_i1	.	-	TRINITY_DN1122_c0_g1_i6	0	503	ID=TRINITY_DN1122_c0_g1_i6.p1;TRINITY_DN1122_c0_g1~~TRINITY_DN1122_c0_g1_i6.p1;ORF_type:5prime_partial_(-),score=26.94	0	-	190	502	0	1	503	0	No
TRINITY_DN47_c2_g1_i1	.	-	TRINITY_DN3629_c0_g1_i2	0	3866	ID=TRINITY_DN3629_c0_g1_i2.p1;TRINITY_DN3629_c0_g1~~TRINITY_DN3629_c0_g1_i2.p1;ORF_type:complete_(+),score=212.32	0	+	332	3338	0	1	3866	0	No
TRINITY_DN47_c2_g1_i1	.	-	TRINITY_DN3629_c0_g1_i13	0	5965	ID=TRINITY_DN3629_c0_g1_i13.p1;TRINITY_DN3629_c0_g1~~TRINITY_DN3629_c0_g1_i13.p1;ORF_type:complete_(+),score=156.24	0	+	3283	5437	0	1	5965	0	No
TRINITY_DN47_c2_g1_i1	.	-	TRINITY_DN3629_c0_g1_i13	0	5965	ID=TRINITY_DN3629_c0_g1_i13.p2;TRINITY_DN3629_c0_g1~~TRINITY_DN3629_c0_g1_i13.p2;ORF_type:complete_(+),score=41.44	0	+	2335	2971	0	1	5965	0	No
TRINITY_DN47_c2_g1_i1	.	-	TRINITY_DN3629_c0_g1_i11	0	5599	ID=TRINITY_DN3629_c0_g1_i11.p1;TRINITY_DN3629_c0_g1~~TRINITY_DN3629_c0_g1_i11.p1;ORF_type:complete_(+),score=195.97	0	+	2335	5071	0	1	5599	0	No
TRINITY_DN47_c2_g1_i1	.	-	TRINITY_DN3629_c0_g1_i1	0	5439	ID=TRINITY_DN3629_c0_g1_i1.p1;TRINITY_DN3629_c0_g1~~TRINITY_DN3629_c0_g1_i1.p1;ORF_type:complete_(+),score=195.97	0	+	2175	4911	0	1	5439	0	No
TRINITY_DN47_c2_g1_i1	.	-	TRINITY_DN5872_c0_g1_i20	0	1680	ID=TRINITY_DN5872_c0_g1_i20.p1;TRINITY_DN5872_c0_g1~~TRINITY_DN5872_c0_g1_i20.p1;ORF_type:complete_(-),score=17.01	0	-	934	1429	0	1	1680	0	No
TRINITY_DN47_c2_g1_i1	.	-	TRINITY_DN5872_c0_g1_i8	0	2841	ID=TRINITY_DN5872_c0_g1_i8.p1;TRINITY_DN5872_c0_g1~~TRINITY_DN5872_c0_g1_i8.p1;ORF_type:complete_(-),score=53.80	0	-	355	880	0	1	2841	0	No
TRINITY_DN47_c2_g1_i1	.	-	TRINITY_DN5872_c0_g1_i4	0	2627	ID=TRINITY_DN5872_c0_g1_i4.p2;TRINITY_DN5872_c0_g1~~TRINITY_DN5872_c0_g1_i4.p2;ORF_type:complete_(-),score=17.01	0	-	1881	2376	0	1	2627	0	No
TRINITY_DN47_c2_g1_i1	.	-	TRINITY_DN5872_c0_g1_i4	0	2627	ID=TRINITY_DN5872_c0_g1_i4.p1;TRINITY_DN5872_c0_g1~~TRINITY_DN5872_c0_g1_i4.p1;ORF_type:complete_(-),score=53.80	0	-	355	880	0	1	2627	0	No
TRINITY_DN47_c2_g1_i1	.	-	TRINITY_DN5872_c0_g1_i11	0	2758	ID=TRINITY_DN5872_c0_g1_i11.p2;TRINITY_DN5872_c0_g1~~TRINITY_DN5872_c0_g1_i11.p2;ORF_type:5prime_partial_(-),score=33.33	0	-	2338	2758	0	1	2758	0	No
TRINITY_DN47_c2_g1_i1	.	-	TRINITY_DN5872_c0_g1_i11	0	2758	ID=TRINITY_DN5872_c0_g1_i11.p1;TRINITY_DN5872_c0_g1~~TRINITY_DN5872_c0_g1_i11.p1;ORF_type:complete_(-),score=53.80	0	-	355	880	0	1	2758	0	No
TRINITY_DN47_c2_g1_i1	.	+	TRINITY_DN11235_c0_g1_i105	0	3596	ID=TRINITY_DN11235_c0_g1_i105.p1;TRINITY_DN11235_c0_g1~~TRINITY_DN11235_c0_g1_i105.p1;ORF_type:5prime_partial_(+),score=24.45	0	+	2	668	0	1	3596	0	No
TRINITY_DN47_c2_g1_i1	.	+	TRINITY_DN11235_c0_g1_i105	0	3596	ID=TRINITY_DN11235_c0_g1_i105.p2;TRINITY_DN11235_c0_g1~~TRINITY_DN11235_c0_g1_i105.p2;ORF_type:complete_(+),score=40.18	0	+	2398	2977	0	1	3596	0	No
TRINITY_DN47_c2_g1_i1	.	-	TRINITY_DN10441_c0_g2_i1	0	1705	ID=TRINITY_DN10441_c0_g2_i1.p1;TRINITY_DN10441_c0_g2~~TRINITY_DN10441_c0_g2_i1.p1;ORF_type:3prime_partial_(-),score=21.39	0	-	0	363	0	1	1705	0	No
TRINITY_DN47_c2_g1_i2	.	-	TRINITY_DN10305_c0_g1_i5	0	2291	ID=TRINITY_DN10305_c0_g1_i5.p1;TRINITY_DN10305_c0_g1~~TRINITY_DN10305_c0_g1_i5.p1;ORF_type:complete_(-),score=45.49	0	-	1427	2093	0	1	2291	0	No
TRINITY_DN47_c2_g1_i2	.	-	TRINITY_DN10305_c0_g1_i3	0	3340	ID=TRINITY_DN10305_c0_g1_i3.p1;TRINITY_DN10305_c0_g1~~TRINITY_DN10305_c0_g1_i3.p1;ORF_type:complete_(-),score=45.49	0	-	2476	3142	0	1	3340	0	No
TRINITY_DN47_c2_g1_i2	.	-	TRINITY_DN8205_c0_g1_i2	0	3803	ID=TRINITY_DN8205_c0_g1_i2.p1;TRINITY_DN8205_c0_g1~~TRINITY_DN8205_c0_g1_i2.p1;ORF_type:complete_(-),score=16.06	0	-	3004	3487	0	1	3803	0	No
TRINITY_DN47_c2_g1_i2	.	-	TRINITY_DN8205_c0_g1_i2	0	3803	ID=TRINITY_DN8205_c0_g1_i2.p2;TRINITY_DN8205_c0_g1~~TRINITY_DN8205_c0_g1_i2.p2;ORF_type:complete_(-),score=4.68	0	-	1263	1683	0	1	3803	0	No
TRINITY_DN47_c2_g1_i2	.	-	TRINITY_DN8205_c0_g1_i2	0	3803	ID=TRINITY_DN8205_c0_g1_i2.p3;TRINITY_DN8205_c0_g1~~TRINITY_DN8205_c0_g1_i2.p3;ORF_type:complete_(-),score=15.73	0	-	772	1087	0	1	3803	0	No
TRINITY_DN47_c2_g1_i2	.	-	TRINITY_DN8205_c0_g1_i1	0	3418	ID=TRINITY_DN8205_c0_g1_i1.p2;TRINITY_DN8205_c0_g1~~TRINITY_DN8205_c0_g1_i1.p2;ORF_type:complete_(-),score=16.06	0	-	2619	3102	0	1	3418	0	No
TRINITY_DN47_c2_g1_i2	.	-	TRINITY_DN8205_c0_g1_i1	0	3418	ID=TRINITY_DN8205_c0_g1_i1.p1;TRINITY_DN8205_c0_g1~~TRINITY_DN8205_c0_g1_i1.p1;ORF_type:complete_(-),score=41.06	0	-	710	1298	0	1	3418	0	No
TRINITY_DN47_c2_g1_i2	.	+	TRINITY_DN2933_c0_g1_i5	0	2986	ID=TRINITY_DN2933_c0_g1_i5.p1;TRINITY_DN2933_c0_g1~~TRINITY_DN2933_c0_g1_i5.p1;ORF_type:complete_(+),score=64.48	0	+	143	1001	0	1	2986	0	No
TRINITY_DN47_c2_g1_i2	.	+	TRINITY_DN2933_c0_g1_i5	0	2986	ID=TRINITY_DN2933_c0_g1_i5.p2;TRINITY_DN2933_c0_g1~~TRINITY_DN2933_c0_g1_i5.p2;ORF_type:complete_(+),score=24.32	0	+	1079	1409	0	1	2986	0	No
TRINITY_DN47_c2_g1_i2	.	+	TRINITY_DN2933_c0_g1_i5	0	2986	ID=TRINITY_DN2933_c0_g1_i5.p3;TRINITY_DN2933_c0_g1~~TRINITY_DN2933_c0_g1_i5.p3;ORF_type:3prime_partial_(+),score=1.11	0	+	2664	2985	0	1	2986	0	No
TRINITY_DN47_c2_g1_i2	.	+	TRINITY_DN2933_c0_g1_i32	0	4261	ID=TRINITY_DN2933_c0_g1_i32.p1;TRINITY_DN2933_c0_g1~~TRINITY_DN2933_c0_g1_i32.p1;ORF_type:complete_(+),score=41.98	0	+	1038	1590	0	1	4261	0	No
TRINITY_DN47_c2_g1_i2	.	+	TRINITY_DN2933_c0_g1_i32	0	4261	ID=TRINITY_DN2933_c0_g1_i32.p3;TRINITY_DN2933_c0_g1~~TRINITY_DN2933_c0_g1_i32.p3;ORF_type:complete_(+),score=24.32	0	+	2142	2472	0	1	4261	0	No
TRINITY_DN47_c2_g1_i2	.	+	TRINITY_DN2933_c0_g1_i32	0	4261	ID=TRINITY_DN2933_c0_g1_i32.p2;TRINITY_DN2933_c0_g1~~TRINITY_DN2933_c0_g1_i32.p2;ORF_type:complete_(+),score=22.10	0	+	3015	3504	0	1	4261	0	No
TRINITY_DN47_c2_g1_i2	.	+	TRINITY_DN2933_c0_g1_i32	0	4261	ID=TRINITY_DN2933_c0_g1_i32.p4;TRINITY_DN2933_c0_g1~~TRINITY_DN2933_c0_g1_i32.p4;ORF_type:complete_(-),score=9.25	0	-	3870	4179	0	1	4261	0	No
TRINITY_DN47_c2_g1_i2	.	+	TRINITY_DN4193_c0_g2_i25	0	4135	ID=TRINITY_DN4193_c0_g2_i25.p1;TRINITY_DN4193_c0_g2~~TRINITY_DN4193_c0_g2_i25.p1;ORF_type:complete_(+),score=95.72	0	+	52	1306	0	1	4135	0	No
TRINITY_DN47_c2_g1_i2	.	+	TRINITY_DN4193_c0_g2_i25	0	4135	ID=TRINITY_DN4193_c0_g2_i25.p2;TRINITY_DN4193_c0_g2~~TRINITY_DN4193_c0_g2_i25.p2;ORF_type:complete_(+),score=21.52	0	+	2721	3330	0	1	4135	0	No
TRINITY_DN47_c2_g1_i2	.	-	TRINITY_DN1613_c1_g2_i2	0	2417	ID=TRINITY_DN1613_c1_g2_i2.p1;TRINITY_DN1613_c1_g2~~TRINITY_DN1613_c1_g2_i2.p1;ORF_type:complete_(-),score=57.98	0	-	751	1480	0	1	2417	0	No
TRINITY_DN47_c2_g1_i2	.	-	TRINITY_DN2666_c0_g1_i5	0	1270	ID=TRINITY_DN2666_c0_g1_i5.p1;TRINITY_DN2666_c0_g1~~TRINITY_DN2666_c0_g1_i5.p1;ORF_type:complete_(-),score=64.54	0	-	128	1103	0	1	1270	0	No
TRINITY_DN47_c2_g1_i2	.	-	TRINITY_DN2792_c0_g1_i3	0	3888	ID=TRINITY_DN2792_c0_g1_i3.p4;TRINITY_DN2792_c0_g1~~TRINITY_DN2792_c0_g1_i3.p4;ORF_type:complete_(-),score=16.03	0	-	1017	1356	0	1	3888	0	No
TRINITY_DN47_c2_g1_i2	.	-	TRINITY_DN2792_c0_g1_i3	0	3888	ID=TRINITY_DN2792_c0_g1_i3.p3;TRINITY_DN2792_c0_g1~~TRINITY_DN2792_c0_g1_i3.p3;ORF_type:complete_(-),score=0.39	0	-	2068	2443	0	1	3888	0	No
TRINITY_DN47_c2_g1_i2	.	-	TRINITY_DN2792_c0_g1_i3	0	3888	ID=TRINITY_DN2792_c0_g1_i3.p1;TRINITY_DN2792_c0_g1~~TRINITY_DN2792_c0_g1_i3.p1;ORF_type:complete_(-),score=59.71	0	-	2761	3736	0	1	3888	0	No
TRINITY_DN47_c2_g1_i2	.	-	TRINITY_DN2792_c0_g1_i2	0	3969	ID=TRINITY_DN2792_c0_g1_i2.p3;TRINITY_DN2792_c0_g1~~TRINITY_DN2792_c0_g1_i2.p3;ORF_type:complete_(-),score=0.39	0	-	2149	2524	0	1	3969	0	No
TRINITY_DN47_c2_g1_i2	.	-	TRINITY_DN2792_c0_g1_i2	0	3969	ID=TRINITY_DN2792_c0_g1_i2.p1;TRINITY_DN2792_c0_g1~~TRINITY_DN2792_c0_g1_i2.p1;ORF_type:complete_(-),score=59.71	0	-	2842	3817	0	1	3969	0	No
TRINITY_DN47_c2_g1_i2	.	-	TRINITY_DN3678_c0_g1_i27	0	560	ID=TRINITY_DN3678_c0_g1_i27.p1;TRINITY_DN3678_c0_g1~~TRINITY_DN3678_c0_g1_i27.p1;ORF_type:complete_(+),score=24.69	0	+	151	517	0	1	560	0	No
TRINITY_DN47_c2_g1_i2	.	-	TRINITY_DN4948_c0_g1_i23	0	5832	ID=TRINITY_DN4948_c0_g1_i23.p1;TRINITY_DN4948_c0_g1~~TRINITY_DN4948_c0_g1_i23.p1;ORF_type:5prime_partial_(-),score=7.57	0	-	5484	5832	0	1	5832	0	No
TRINITY_DN47_c2_g1_i2	.	-	TRINITY_DN4948_c0_g1_i23	0	5832	ID=TRINITY_DN4948_c0_g1_i23.p2;TRINITY_DN4948_c0_g1~~TRINITY_DN4948_c0_g1_i23.p2;ORF_type:complete_(-),score=18.85	0	-	923	1271	0	1	5832	0	No
TRINITY_DN47_c2_g1_i2	.	-	TRINITY_DN4948_c0_g1_i23	0	5832	ID=TRINITY_DN4948_c0_g1_i23.p3;TRINITY_DN4948_c0_g1~~TRINITY_DN4948_c0_g1_i23.p3;ORF_type:complete_(+),score=4.28	0	+	4339	4660	0	1	5832	0	No
TRINITY_DN47_c2_g1_i4	.	-	TRINITY_DN10305_c0_g1_i5	0	2291	ID=TRINITY_DN10305_c0_g1_i5.p1;TRINITY_DN10305_c0_g1~~TRINITY_DN10305_c0_g1_i5.p1;ORF_type:complete_(-),score=45.49	0	-	1427	2093	0	1	2291	0	No
TRINITY_DN47_c2_g1_i4	.	-	TRINITY_DN10305_c0_g1_i3	0	3340	ID=TRINITY_DN10305_c0_g1_i3.p1;TRINITY_DN10305_c0_g1~~TRINITY_DN10305_c0_g1_i3.p1;ORF_type:complete_(-),score=45.49	0	-	2476	3142	0	1	3340	0	No
TRINITY_DN47_c2_g1_i4	.	+	TRINITY_DN2933_c0_g1_i5	0	2986	ID=TRINITY_DN2933_c0_g1_i5.p1;TRINITY_DN2933_c0_g1~~TRINITY_DN2933_c0_g1_i5.p1;ORF_type:complete_(+),score=64.48	0	+	143	1001	0	1	2986	0	No
TRINITY_DN47_c2_g1_i4	.	+	TRINITY_DN2933_c0_g1_i5	0	2986	ID=TRINITY_DN2933_c0_g1_i5.p2;TRINITY_DN2933_c0_g1~~TRINITY_DN2933_c0_g1_i5.p2;ORF_type:complete_(+),score=24.32	0	+	1079	1409	0	1	2986	0	No
TRINITY_DN47_c2_g1_i4	.	+	TRINITY_DN2933_c0_g1_i5	0	2986	ID=TRINITY_DN2933_c0_g1_i5.p3;TRINITY_DN2933_c0_g1~~TRINITY_DN2933_c0_g1_i5.p3;ORF_type:3prime_partial_(+),score=1.11	0	+	2664	2985	0	1	2986	0	No
TRINITY_DN47_c2_g1_i4	.	+	TRINITY_DN2933_c0_g1_i32	0	4261	ID=TRINITY_DN2933_c0_g1_i32.p1;TRINITY_DN2933_c0_g1~~TRINITY_DN2933_c0_g1_i32.p1;ORF_type:complete_(+),score=41.98	0	+	1038	1590	0	1	4261	0	No
TRINITY_DN47_c2_g1_i4	.	+	TRINITY_DN2933_c0_g1_i32	0	4261	ID=TRINITY_DN2933_c0_g1_i32.p3;TRINITY_DN2933_c0_g1~~TRINITY_DN2933_c0_g1_i32.p3;ORF_type:complete_(+),score=24.32	0	+	2142	2472	0	1	4261	0	No
TRINITY_DN47_c2_g1_i4	.	+	TRINITY_DN2933_c0_g1_i32	0	4261	ID=TRINITY_DN2933_c0_g1_i32.p2;TRINITY_DN2933_c0_g1~~TRINITY_DN2933_c0_g1_i32.p2;ORF_type:complete_(+),score=22.10	0	+	3015	3504	0	1	4261	0	No
TRINITY_DN47_c2_g1_i4	.	+	TRINITY_DN2933_c0_g1_i32	0	4261	ID=TRINITY_DN2933_c0_g1_i32.p4;TRINITY_DN2933_c0_g1~~TRINITY_DN2933_c0_g1_i32.p4;ORF_type:complete_(-),score=9.25	0	-	3870	4179	0	1	4261	0	No
TRINITY_DN47_c2_g1_i4	.	-	TRINITY_DN8205_c0_g1_i2	0	3803	ID=TRINITY_DN8205_c0_g1_i2.p1;TRINITY_DN8205_c0_g1~~TRINITY_DN8205_c0_g1_i2.p1;ORF_type:complete_(-),score=16.06	0	-	3004	3487	0	1	3803	0	No
TRINITY_DN47_c2_g1_i4	.	-	TRINITY_DN8205_c0_g1_i2	0	3803	ID=TRINITY_DN8205_c0_g1_i2.p2;TRINITY_DN8205_c0_g1~~TRINITY_DN8205_c0_g1_i2.p2;ORF_type:complete_(-),score=4.68	0	-	1263	1683	0	1	3803	0	No
TRINITY_DN47_c2_g1_i4	.	-	TRINITY_DN8205_c0_g1_i2	0	3803	ID=TRINITY_DN8205_c0_g1_i2.p3;TRINITY_DN8205_c0_g1~~TRINITY_DN8205_c0_g1_i2.p3;ORF_type:complete_(-),score=15.73	0	-	772	1087	0	1	3803	0	No
TRINITY_DN47_c2_g1_i4	.	-	TRINITY_DN8205_c0_g1_i1	0	3418	ID=TRINITY_DN8205_c0_g1_i1.p2;TRINITY_DN8205_c0_g1~~TRINITY_DN8205_c0_g1_i1.p2;ORF_type:complete_(-),score=16.06	0	-	2619	3102	0	1	3418	0	No
TRINITY_DN47_c2_g1_i4	.	-	TRINITY_DN8205_c0_g1_i1	0	3418	ID=TRINITY_DN8205_c0_g1_i1.p1;TRINITY_DN8205_c0_g1~~TRINITY_DN8205_c0_g1_i1.p1;ORF_type:complete_(-),score=41.06	0	-	710	1298	0	1	3418	0	No
TRINITY_DN47_c2_g1_i4	.	+	TRINITY_DN9294_c0_g1_i1	0	2159	ID=TRINITY_DN9294_c0_g1_i1.p1;TRINITY_DN9294_c0_g1~~TRINITY_DN9294_c0_g1_i1.p1;ORF_type:complete_(-),score=47.05	0	-	951	2145	0	1	2159	0	No
TRINITY_DN47_c2_g1_i4	.	+	TRINITY_DN14446_c4_g1_i1	0	1791	ID=TRINITY_DN14446_c4_g1_i1.p1;TRINITY_DN14446_c4_g1~~TRINITY_DN14446_c4_g1_i1.p1;ORF_type:3prime_partial_(-),score=2.67	0	-	0	303	0	1	1791	0	No
TRINITY_DN47_c2_g1_i4	.	-	TRINITY_DN2527_c0_g1_i2	0	2625	ID=TRINITY_DN2527_c0_g1_i2.p1;TRINITY_DN2527_c0_g1~~TRINITY_DN2527_c0_g1_i2.p1;ORF_type:5prime_partial_(-),score=114.56	0	-	1593	2625	0	1	2625	0	No
TRINITY_DN47_c2_g1_i4	.	-	TRINITY_DN2527_c0_g1_i14	0	5126	ID=TRINITY_DN2527_c0_g1_i14.p1;TRINITY_DN2527_c0_g1~~TRINITY_DN2527_c0_g1_i14.p1;ORF_type:complete_(-),score=178.80	0	-	664	2881	0	1	5126	0	No
TRINITY_DN47_c2_g1_i4	.	-	TRINITY_DN2527_c0_g1_i14	0	5126	ID=TRINITY_DN2527_c0_g1_i14.p2;TRINITY_DN2527_c0_g1~~TRINITY_DN2527_c0_g1_i14.p2;ORF_type:5prime_partial_(-),score=114.56	0	-	4094	5126	0	1	5126	0	No
TRINITY_DN47_c2_g1_i4	.	-	TRINITY_DN2792_c0_g1_i3	0	3888	ID=TRINITY_DN2792_c0_g1_i3.p4;TRINITY_DN2792_c0_g1~~TRINITY_DN2792_c0_g1_i3.p4;ORF_type:complete_(-),score=16.03	0	-	1017	1356	0	1	3888	0	No
TRINITY_DN47_c2_g1_i4	.	-	TRINITY_DN2792_c0_g1_i3	0	3888	ID=TRINITY_DN2792_c0_g1_i3.p3;TRINITY_DN2792_c0_g1~~TRINITY_DN2792_c0_g1_i3.p3;ORF_type:complete_(-),score=0.39	0	-	2068	2443	0	1	3888	0	No
TRINITY_DN47_c2_g1_i4	.	-	TRINITY_DN2792_c0_g1_i3	0	3888	ID=TRINITY_DN2792_c0_g1_i3.p1;TRINITY_DN2792_c0_g1~~TRINITY_DN2792_c0_g1_i3.p1;ORF_type:complete_(-),score=59.71	0	-	2761	3736	0	1	3888	0	No
TRINITY_DN47_c2_g1_i4	.	-	TRINITY_DN2792_c0_g1_i2	0	3969	ID=TRINITY_DN2792_c0_g1_i2.p3;TRINITY_DN2792_c0_g1~~TRINITY_DN2792_c0_g1_i2.p3;ORF_type:complete_(-),score=0.39	0	-	2149	2524	0	1	3969	0	No
TRINITY_DN47_c2_g1_i4	.	-	TRINITY_DN2792_c0_g1_i2	0	3969	ID=TRINITY_DN2792_c0_g1_i2.p1;TRINITY_DN2792_c0_g1~~TRINITY_DN2792_c0_g1_i2.p1;ORF_type:complete_(-),score=59.71	0	-	2842	3817	0	1	3969	0	No
TRINITY_DN47_c2_g1_i4	.	-	TRINITY_DN1613_c1_g2_i2	0	2417	ID=TRINITY_DN1613_c1_g2_i2.p1;TRINITY_DN1613_c1_g2~~TRINITY_DN1613_c1_g2_i2.p1;ORF_type:complete_(-),score=57.98	0	-	751	1480	0	1	2417	0	No
TRINITY_DN47_c2_g1_i4	.	+	TRINITY_DN4193_c0_g2_i25	0	4135	ID=TRINITY_DN4193_c0_g2_i25.p1;TRINITY_DN4193_c0_g2~~TRINITY_DN4193_c0_g2_i25.p1;ORF_type:complete_(+),score=95.72	0	+	52	1306	0	1	4135	0	No
TRINITY_DN47_c2_g1_i4	.	+	TRINITY_DN4193_c0_g2_i25	0	4135	ID=TRINITY_DN4193_c0_g2_i25.p2;TRINITY_DN4193_c0_g2~~TRINITY_DN4193_c0_g2_i25.p2;ORF_type:complete_(+),score=21.52	0	+	2721	3330	0	1	4135	0	No
TRINITY_DN47_c2_g1_i4	.	-	TRINITY_DN5848_c0_g1_i54	0	5604	ID=TRINITY_DN5848_c0_g1_i54.p2;TRINITY_DN5848_c0_g1~~TRINITY_DN5848_c0_g1_i54.p2;ORF_type:3prime_partial_(-),score=10.27	0	-	2	320	0	1	5604	0	No
TRINITY_DN47_c2_g1_i4	.	-	TRINITY_DN5848_c0_g1_i54	0	5604	ID=TRINITY_DN5848_c0_g1_i54.p1;TRINITY_DN5848_c0_g1~~TRINITY_DN5848_c0_g1_i54.p1;ORF_type:complete_(-),score=10.36	0	-	4322	4682	0	1	5604	0	No
TRINITY_DN47_c2_g1_i4	.	-	TRINITY_DN3678_c0_g1_i27	0	560	ID=TRINITY_DN3678_c0_g1_i27.p1;TRINITY_DN3678_c0_g1~~TRINITY_DN3678_c0_g1_i27.p1;ORF_type:complete_(+),score=24.69	0	+	151	517	0	1	560	0	No
TRINITY_DN47_c2_g1_i4	.	-	TRINITY_DN2666_c0_g1_i5	0	1270	ID=TRINITY_DN2666_c0_g1_i5.p1;TRINITY_DN2666_c0_g1~~TRINITY_DN2666_c0_g1_i5.p1;ORF_type:complete_(-),score=64.54	0	-	128	1103	0	1	1270	0	No
TRINITY_DN47_c2_g1_i4	.	+	TRINITY_DN11235_c0_g1_i91	0	3006	ID=TRINITY_DN11235_c0_g1_i91.p2;TRINITY_DN11235_c0_g1~~TRINITY_DN11235_c0_g1_i91.p2;ORF_type:complete_(+),score=21.84	0	+	1582	1894	0	1	3006	0	No
TRINITY_DN47_c2_g1_i4	.	+	TRINITY_DN11235_c0_g1_i91	0	3006	ID=TRINITY_DN11235_c0_g1_i91.p1;TRINITY_DN11235_c0_g1~~TRINITY_DN11235_c0_g1_i91.p1;ORF_type:5prime_partial_(+),score=24.45	0	+	2	668	0	1	3006	0	No
TRINITY_DN47_c2_g1_i4	.	+	TRINITY_DN11235_c0_g1_i82	0	4043	ID=TRINITY_DN11235_c0_g1_i82.p1;TRINITY_DN11235_c0_g1~~TRINITY_DN11235_c0_g1_i82.p1;ORF_type:complete_(+),score=40.18	0	+	2845	3424	0	1	4043	0	No
TRINITY_DN47_c2_g1_i4	.	+	TRINITY_DN11235_c0_g1_i82	0	4043	ID=TRINITY_DN11235_c0_g1_i82.p2;TRINITY_DN11235_c0_g1~~TRINITY_DN11235_c0_g1_i82.p2;ORF_type:5prime_partial_(+),score=12.70	0	+	2	422	0	1	4043	0	No
TRINITY_DN47_c2_g1_i4	.	+	TRINITY_DN11235_c0_g1_i44	0	4014	ID=TRINITY_DN11235_c0_g1_i44.p1;TRINITY_DN11235_c0_g1~~TRINITY_DN11235_c0_g1_i44.p1;ORF_type:5prime_partial_(+),score=12.70	0	+	2	422	0	1	4014	0	No
TRINITY_DN47_c2_g1_i4	.	-	TRINITY_DN4948_c0_g1_i23	0	5832	ID=TRINITY_DN4948_c0_g1_i23.p1;TRINITY_DN4948_c0_g1~~TRINITY_DN4948_c0_g1_i23.p1;ORF_type:5prime_partial_(-),score=7.57	0	-	5484	5832	0	1	5832	0	No
TRINITY_DN47_c2_g1_i4	.	-	TRINITY_DN4948_c0_g1_i23	0	5832	ID=TRINITY_DN4948_c0_g1_i23.p2;TRINITY_DN4948_c0_g1~~TRINITY_DN4948_c0_g1_i23.p2;ORF_type:complete_(-),score=18.85	0	-	923	1271	0	1	5832	0	No
TRINITY_DN47_c2_g1_i4	.	-	TRINITY_DN4948_c0_g1_i23	0	5832	ID=TRINITY_DN4948_c0_g1_i23.p3;TRINITY_DN4948_c0_g1~~TRINITY_DN4948_c0_g1_i23.p3;ORF_type:complete_(+),score=4.28	0	+	4339	4660	0	1	5832	0	No
TRINITY_DN47_c2_g1_i4	.	+	TRINITY_DN7336_c0_g1_i27	0	1867	ID=TRINITY_DN7336_c0_g1_i27.p1;TRINITY_DN7336_c0_g1~~TRINITY_DN7336_c0_g1_i27.p1;ORF_type:5prime_partial_(+),score=125.33	0	+	2	1475	0	1	1867	0	No
TRINITY_DN47_c2_g1_i4	.	+	TRINITY_DN4505_c2_g1_i7	0	789	ID=TRINITY_DN4505_c2_g1_i7.p1;TRINITY_DN4505_c2_g1~~TRINITY_DN4505_c2_g1_i7.p1;ORF_type:5prime_partial_(+),score=19.66	0	+	2	767	0	1	789	0	No
TRINITY_DN47_c2_g1_i4	.	-	TRINITY_DN1122_c0_g1_i6	0	503	ID=TRINITY_DN1122_c0_g1_i6.p1;TRINITY_DN1122_c0_g1~~TRINITY_DN1122_c0_g1_i6.p1;ORF_type:5prime_partial_(-),score=26.94	0	-	190	502	0	1	503	0	No
TRINITY_DN47_c2_g1_i4	.	-	TRINITY_DN3629_c0_g1_i2	0	3866	ID=TRINITY_DN3629_c0_g1_i2.p1;TRINITY_DN3629_c0_g1~~TRINITY_DN3629_c0_g1_i2.p1;ORF_type:complete_(+),score=212.32	0	+	332	3338	0	1	3866	0	No
TRINITY_DN47_c2_g1_i4	.	-	TRINITY_DN3629_c0_g1_i13	0	5965	ID=TRINITY_DN3629_c0_g1_i13.p1;TRINITY_DN3629_c0_g1~~TRINITY_DN3629_c0_g1_i13.p1;ORF_type:complete_(+),score=156.24	0	+	3283	5437	0	1	5965	0	No
TRINITY_DN47_c2_g1_i4	.	-	TRINITY_DN3629_c0_g1_i13	0	5965	ID=TRINITY_DN3629_c0_g1_i13.p2;TRINITY_DN3629_c0_g1~~TRINITY_DN3629_c0_g1_i13.p2;ORF_type:complete_(+),score=41.44	0	+	2335	2971	0	1	5965	0	No
TRINITY_DN47_c2_g1_i4	.	-	TRINITY_DN3629_c0_g1_i11	0	5599	ID=TRINITY_DN3629_c0_g1_i11.p1;TRINITY_DN3629_c0_g1~~TRINITY_DN3629_c0_g1_i11.p1;ORF_type:complete_(+),score=195.97	0	+	2335	5071	0	1	5599	0	No
TRINITY_DN47_c2_g1_i4	.	-	TRINITY_DN3629_c0_g1_i1	0	5439	ID=TRINITY_DN3629_c0_g1_i1.p1;TRINITY_DN3629_c0_g1~~TRINITY_DN3629_c0_g1_i1.p1;ORF_type:complete_(+),score=195.97	0	+	2175	4911	0	1	5439	0	No
TRINITY_DN47_c2_g1_i4	.	-	TRINITY_DN5872_c0_g1_i20	0	1680	ID=TRINITY_DN5872_c0_g1_i20.p1;TRINITY_DN5872_c0_g1~~TRINITY_DN5872_c0_g1_i20.p1;ORF_type:complete_(-),score=17.01	0	-	934	1429	0	1	1680	0	No
TRINITY_DN47_c2_g1_i4	.	-	TRINITY_DN5872_c0_g1_i8	0	2841	ID=TRINITY_DN5872_c0_g1_i8.p1;TRINITY_DN5872_c0_g1~~TRINITY_DN5872_c0_g1_i8.p1;ORF_type:complete_(-),score=53.80	0	-	355	880	0	1	2841	0	No
TRINITY_DN47_c2_g1_i4	.	-	TRINITY_DN5872_c0_g1_i4	0	2627	ID=TRINITY_DN5872_c0_g1_i4.p2;TRINITY_DN5872_c0_g1~~TRINITY_DN5872_c0_g1_i4.p2;ORF_type:complete_(-),score=17.01	0	-	1881	2376	0	1	2627	0	No
TRINITY_DN47_c2_g1_i4	.	-	TRINITY_DN5872_c0_g1_i4	0	2627	ID=TRINITY_DN5872_c0_g1_i4.p1;TRINITY_DN5872_c0_g1~~TRINITY_DN5872_c0_g1_i4.p1;ORF_type:complete_(-),score=53.80	0	-	355	880	0	1	2627	0	No
TRINITY_DN47_c2_g1_i4	.	-	TRINITY_DN5872_c0_g1_i11	0	2758	ID=TRINITY_DN5872_c0_g1_i11.p2;TRINITY_DN5872_c0_g1~~TRINITY_DN5872_c0_g1_i11.p2;ORF_type:5prime_partial_(-),score=33.33	0	-	2338	2758	0	1	2758	0	No
TRINITY_DN47_c2_g1_i4	.	-	TRINITY_DN5872_c0_g1_i11	0	2758	ID=TRINITY_DN5872_c0_g1_i11.p1;TRINITY_DN5872_c0_g1~~TRINITY_DN5872_c0_g1_i11.p1;ORF_type:complete_(-),score=53.80	0	-	355	880	0	1	2758	0	No
TRINITY_DN47_c2_g1_i4	.	+	TRINITY_DN11235_c0_g1_i105	0	3596	ID=TRINITY_DN11235_c0_g1_i105.p1;TRINITY_DN11235_c0_g1~~TRINITY_DN11235_c0_g1_i105.p1;ORF_type:5prime_partial_(+),score=24.45	0	+	2	668	0	1	3596	0	No
TRINITY_DN47_c2_g1_i4	.	+	TRINITY_DN11235_c0_g1_i105	0	3596	ID=TRINITY_DN11235_c0_g1_i105.p2;TRINITY_DN11235_c0_g1~~TRINITY_DN11235_c0_g1_i105.p2;ORF_type:complete_(+),score=40.18	0	+	2398	2977	0	1	3596	0	No
TRINITY_DN47_c2_g1_i4	.	-	TRINITY_DN10441_c0_g2_i1	0	1705	ID=TRINITY_DN10441_c0_g2_i1.p1;TRINITY_DN10441_c0_g2~~TRINITY_DN10441_c0_g2_i1.p1;ORF_type:3prime_partial_(-),score=21.39	0	-	0	363	0	1	1705	0	No
TRINITY_DN47_c5_g1_i1	.	+	TRINITY_DN3773_c0_g1_i11	0	3491	ID=TRINITY_DN3773_c0_g1_i11.p1;TRINITY_DN3773_c0_g1~~TRINITY_DN3773_c0_g1_i11.p1;ORF_type:5prime_partial_(-),score=15.27	0	-	3125	3491	0	1	3491	0	No
TRINITY_DN47_c5_g1_i1	.	-	TRINITY_DN1312_c0_g1_i6	0	2224	ID=TRINITY_DN1312_c0_g1_i6.p1;TRINITY_DN1312_c0_g1~~TRINITY_DN1312_c0_g1_i6.p1;ORF_type:complete_(-),score=41.53	0	-	831	1263	0	1	2224	0	No
TRINITY_DN47_c5_g1_i1	.	+	TRINITY_DN38138_c0_g1_i1	0	850	ID=TRINITY_DN38138_c0_g1_i1.p1;TRINITY_DN38138_c0_g1~~TRINITY_DN38138_c0_g1_i1.p1;ORF_type:5prime_partial_(+),score=9.66	0	+	0	321	0	1	850	0	No
TRINITY_DN47_c5_g1_i1	.	+	TRINITY_DN6895_c0_g1_i3	0	3066	ID=TRINITY_DN6895_c0_g1_i3.p1;TRINITY_DN6895_c0_g1~~TRINITY_DN6895_c0_g1_i3.p1;ORF_type:complete_(-),score=40.88	0	-	428	1328	0	1	3066	0	No
TRINITY_DN47_c5_g1_i1	.	+	TRINITY_DN6895_c0_g1_i3	0	3066	ID=TRINITY_DN6895_c0_g1_i3.p2;TRINITY_DN6895_c0_g1~~TRINITY_DN6895_c0_g1_i3.p2;ORF_type:complete_(-),score=17.10	0	-	2552	2927	0	1	3066	0	No
TRINITY_DN47_c5_g1_i1	.	-	TRINITY_DN2851_c0_g1_i36	0	6489	ID=TRINITY_DN2851_c0_g1_i36.p2;TRINITY_DN2851_c0_g1~~TRINITY_DN2851_c0_g1_i36.p2;ORF_type:complete_(+),score=15.24	0	+	193	751	0	1	6489	0	No
TRINITY_DN47_c5_g1_i1	.	-	TRINITY_DN2851_c0_g1_i36	0	6489	ID=TRINITY_DN2851_c0_g1_i36.p1;TRINITY_DN2851_c0_g1~~TRINITY_DN2851_c0_g1_i36.p1;ORF_type:complete_(+),score=89.02	0	+	4276	5533	0	1	6489	0	No
TRINITY_DN47_c5_g1_i1	.	-	TRINITY_DN2851_c0_g1_i36	0	6489	ID=TRINITY_DN2851_c0_g1_i36.p3;TRINITY_DN2851_c0_g1~~TRINITY_DN2851_c0_g1_i36.p3;ORF_type:complete_(+),score=5.82	0	+	2190	2568	0	1	6489	0	No
TRINITY_DN47_c5_g1_i1	.	-	TRINITY_DN2851_c0_g1_i26	0	5082	ID=TRINITY_DN2851_c0_g1_i26.p1;TRINITY_DN2851_c0_g1~~TRINITY_DN2851_c0_g1_i26.p1;ORF_type:complete_(+),score=15.24	0	+	193	751	0	1	5082	0	No
TRINITY_DN47_c5_g1_i1	.	-	TRINITY_DN2851_c0_g1_i26	0	5082	ID=TRINITY_DN2851_c0_g1_i26.p2;TRINITY_DN2851_c0_g1~~TRINITY_DN2851_c0_g1_i26.p2;ORF_type:complete_(+),score=50.86	0	+	4277	4805	0	1	5082	0	No
TRINITY_DN47_c5_g1_i1	.	-	TRINITY_DN2851_c0_g1_i26	0	5082	ID=TRINITY_DN2851_c0_g1_i26.p3;TRINITY_DN2851_c0_g1~~TRINITY_DN2851_c0_g1_i26.p3;ORF_type:complete_(+),score=5.82	0	+	2190	2568	0	1	5082	0	No
TRINITY_DN47_c5_g1_i1	.	-	TRINITY_DN3512_c0_g1_i7	0	2541	ID=TRINITY_DN3512_c0_g1_i7.p1;TRINITY_DN3512_c0_g1~~TRINITY_DN3512_c0_g1_i7.p1;ORF_type:complete_(+),score=66.54	0	+	296	1622	0	1	2541	0	No
TRINITY_DN47_c5_g1_i1	.	-	TRINITY_DN44168_c0_g1_i1	0	2814	ID=TRINITY_DN44168_c0_g1_i1.p1;TRINITY_DN44168_c0_g1~~TRINITY_DN44168_c0_g1_i1.p1;ORF_type:complete_(+),score=19.53	0	+	47	383	0	1	2814	0	No
TRINITY_DN47_c6_g1_i1	.	+	TRINITY_DN168_c2_g1_i2	0	1053	ID=TRINITY_DN168_c2_g1_i2.p1;TRINITY_DN168_c2_g1~~TRINITY_DN168_c2_g1_i2.p1;ORF_type:complete_(-),score=49.42	0	-	390	918	0	1	1053	0	Yes
TRINITY_DN47_c6_g1_i1	.	+	TRINITY_DN168_c2_g1_i2	0	1053	ID=TRINITY_DN168_c2_g1_i2.p1;TRINITY_DN168_c2_g1~~TRINITY_DN168_c2_g1_i2.p1;ORF_type:complete_(-),score=49.42	0	-	390	918	0	1	1053	0	Yes
TRINITY_DN84_c6_g1_i1	.	-	TRINITY_DN4721_c2_g1_i2	0	977	ID=TRINITY_DN4721_c2_g1_i2.p1;TRINITY_DN4721_c2_g1~~TRINITY_DN4721_c2_g1_i2.p1;ORF_type:5prime_partial_(-),score=35.29	0	-	571	976	0	1	977	0	No
TRINITY_DN84_c6_g1_i1	.	-	TRINITY_DN4721_c2_g1_i1	0	1068	ID=TRINITY_DN4721_c2_g1_i1.p1;TRINITY_DN4721_c2_g1~~TRINITY_DN4721_c2_g1_i1.p1;ORF_type:complete_(-),score=13.73	0	-	571	895	0	1	1068	0	No
TRINITY_DN90_c1_g3_i1	.	+	TRINITY_DN355_c1_g1_i1	0	5403	ID=TRINITY_DN355_c1_g1_i1.p2;TRINITY_DN355_c1_g1~~TRINITY_DN355_c1_g1_i1.p2;ORF_type:complete_(+),score=8.22	0	+	2926	3316	0	1	5403	0	No
TRINITY_DN90_c2_g2_i1	.	-	TRINITY_DN4039_c0_g1_i8	0	2645	ID=TRINITY_DN4039_c0_g1_i8.p2;TRINITY_DN4039_c0_g1~~TRINITY_DN4039_c0_g1_i8.p2;ORF_type:complete_(+),score=5.05	0	+	1808	2138	0	1	2645	0	No
TRINITY_DN90_c2_g2_i1	.	-	TRINITY_DN4039_c0_g1_i8	0	2645	ID=TRINITY_DN4039_c0_g1_i8.p1;TRINITY_DN4039_c0_g1~~TRINITY_DN4039_c0_g1_i8.p1;ORF_type:complete_(+),score=42.65	0	+	888	1386	0	1	2645	0	No
TRINITY_DN90_c2_g2_i1	.	-	TRINITY_DN4039_c0_g1_i24	0	2332	ID=TRINITY_DN4039_c0_g1_i24.p1;TRINITY_DN4039_c0_g1~~TRINITY_DN4039_c0_g1_i24.p1;ORF_type:complete_(+),score=66.80	0	+	293	1073	0	1	2332	0	No
TRINITY_DN90_c2_g2_i1	.	-	TRINITY_DN4039_c0_g1_i24	0	2332	ID=TRINITY_DN4039_c0_g1_i24.p2;TRINITY_DN4039_c0_g1~~TRINITY_DN4039_c0_g1_i24.p2;ORF_type:complete_(+),score=5.05	0	+	1495	1825	0	1	2332	0	No
TRINITY_DN90_c2_g2_i1	.	-	TRINITY_DN4039_c0_g1_i18	0	2391	ID=TRINITY_DN4039_c0_g1_i18.p1;TRINITY_DN4039_c0_g1~~TRINITY_DN4039_c0_g1_i18.p1;ORF_type:complete_(+),score=58.93	0	+	293	1055	0	1	2391	0	No
TRINITY_DN90_c2_g2_i1	.	-	TRINITY_DN4039_c0_g1_i18	0	2391	ID=TRINITY_DN4039_c0_g1_i18.p2;TRINITY_DN4039_c0_g1~~TRINITY_DN4039_c0_g1_i18.p2;ORF_type:complete_(+),score=5.05	0	+	1554	1884	0	1	2391	0	No
TRINITY_DN90_c2_g2_i1	.	-	TRINITY_DN4039_c0_g1_i10	0	1300	ID=TRINITY_DN4039_c0_g1_i10.p1;TRINITY_DN4039_c0_g1~~TRINITY_DN4039_c0_g1_i10.p1;ORF_type:complete_(+),score=56.00	0	+	293	1073	0	1	1300	0	No
TRINITY_DN35_c0_g2_i1	.	+	TRINITY_DN35_c0_g1_i13	0	718	ID=TRINITY_DN35_c0_g1_i13.p1;TRINITY_DN35_c0_g1~~TRINITY_DN35_c0_g1_i13.p1;ORF_type:internal_(-),score=16.81	0	-	2	716	0	1	718	0	No
TRINITY_DN35_c0_g2_i1	.	+	TRINITY_DN35_c0_g1_i10	0	702	ID=TRINITY_DN35_c0_g1_i10.p1;TRINITY_DN35_c0_g1~~TRINITY_DN35_c0_g1_i10.p1;ORF_type:internal_(-),score=6.84	0	-	2	701	0	1	702	0	No
TRINITY_DN35_c0_g2_i1	.	+	TRINITY_DN35_c0_g1_i14	0	703	ID=TRINITY_DN35_c0_g1_i14.p1;TRINITY_DN35_c0_g1~~TRINITY_DN35_c0_g1_i14.p1;ORF_type:3prime_partial_(-),score=2.24	0	-	2	386	0	1	703	0	No
TRINITY_DN35_c0_g2_i1	.	+	TRINITY_DN35_c0_g1_i5	0	589	ID=TRINITY_DN35_c0_g1_i5.p1;TRINITY_DN35_c0_g1~~TRINITY_DN35_c0_g1_i5.p1;ORF_type:internal_(-),score=11.63	0	-	2	587	0	1	589	0	No
TRINITY_DN35_c0_g2_i1	.	-	TRINITY_DN8772_c0_g1_i2	0	513	ID=TRINITY_DN8772_c0_g1_i2.p1;TRINITY_DN8772_c0_g1~~TRINITY_DN8772_c0_g1_i2.p1;ORF_type:5prime_partial_(+),score=9.05	0	+	2	506	0	1	513	0	No
TRINITY_DN35_c0_g2_i1	.	+	TRINITY_DN35_c0_g1_i9	0	552	ID=TRINITY_DN35_c0_g1_i9.p1;TRINITY_DN35_c0_g1~~TRINITY_DN35_c0_g1_i9.p1;ORF_type:internal_(-),score=6.70	0	-	2	551	0	1	552	0	No
TRINITY_DN35_c0_g2_i1	.	+	TRINITY_DN35_c0_g1_i3	0	464	ID=TRINITY_DN35_c0_g1_i3.p1;TRINITY_DN35_c0_g1~~TRINITY_DN35_c0_g1_i3.p1;ORF_type:internal_(-),score=3.11	0	-	2	464	0	1	464	0	No
TRINITY_DN92_c0_g1_i14	.	+	TRINITY_DN92_c0_g1_i10	0	1201	ID=TRINITY_DN92_c0_g1_i10.p1;TRINITY_DN92_c0_g1~~TRINITY_DN92_c0_g1_i10.p1;ORF_type:complete_(-),score=55.72	0	-	212	1028	0	1	1201	0	No
TRINITY_DN92_c0_g1_i14	.	+	TRINITY_DN92_c0_g1_i8	0	1201	ID=TRINITY_DN92_c0_g1_i8.p1;TRINITY_DN92_c0_g1~~TRINITY_DN92_c0_g1_i8.p1;ORF_type:complete_(-),score=55.64	0	-	212	1028	0	1	1201	0	No
TRINITY_DN92_c0_g1_i14	.	+	TRINITY_DN92_c0_g1_i7	0	1589	ID=TRINITY_DN92_c0_g1_i7.p1;TRINITY_DN92_c0_g1~~TRINITY_DN92_c0_g1_i7.p1;ORF_type:complete_(-),score=25.44	0	-	839	1262	0	1	1589	0	No
TRINITY_DN92_c0_g1_i14	.	+	TRINITY_DN92_c0_g1_i6	0	1705	ID=TRINITY_DN92_c0_g1_i6.p1;TRINITY_DN92_c0_g1~~TRINITY_DN92_c0_g1_i6.p1;ORF_type:complete_(-),score=20.67	0	-	1154	1532	0	1	1705	0	No
TRINITY_DN92_c0_g1_i14	.	+	TRINITY_DN92_c0_g1_i4	0	919	ID=TRINITY_DN92_c0_g1_i4.p1;TRINITY_DN92_c0_g1~~TRINITY_DN92_c0_g1_i4.p1;ORF_type:complete_(-),score=31.62	0	-	212	746	0	1	919	0	No
TRINITY_DN92_c0_g1_i14	.	+	TRINITY_DN92_c0_g1_i3	0	1393	ID=TRINITY_DN92_c0_g1_i3.p2;TRINITY_DN92_c0_g1~~TRINITY_DN92_c0_g1_i3.p2;ORF_type:complete_(-),score=20.67	0	-	842	1220	0	1	1393	0	No
TRINITY_DN92_c0_g1_i14	.	+	TRINITY_DN92_c0_g1_i3	0	1393	ID=TRINITY_DN92_c0_g1_i3.p1;TRINITY_DN92_c0_g1~~TRINITY_DN92_c0_g1_i3.p1;ORF_type:complete_(-),score=29.33	0	-	212	704	0	1	1393	0	No
TRINITY_DN92_c0_g1_i14	.	+	TRINITY_DN92_c0_g1_i13	0	1136	ID=TRINITY_DN92_c0_g1_i13.p1;TRINITY_DN92_c0_g1~~TRINITY_DN92_c0_g1_i13.p1;ORF_type:complete_(-),score=33.18	0	-	212	809	0	1	1136	0	No
TRINITY_DN92_c0_g1_i14	.	+	TRINITY_DN92_c0_g1_i9	0	1938	ID=TRINITY_DN92_c0_g1_i9.p1;TRINITY_DN92_c0_g1~~TRINITY_DN92_c0_g1_i9.p1;ORF_type:complete_(-),score=26.74	0	-	212	656	0	1	1938	0	No
TRINITY_DN92_c0_g1_i14	.	+	TRINITY_DN92_c0_g1_i2	0	2021	ID=TRINITY_DN92_c0_g1_i2.p1;TRINITY_DN92_c0_g1~~TRINITY_DN92_c0_g1_i2.p1;ORF_type:complete_(-),score=25.44	0	-	839	1262	0	1	2021	0	No
TRINITY_DN55_c2_g1_i2	.	+	TRINITY_DN55_c2_g1_i6	0	1585	ID=TRINITY_DN55_c2_g1_i6.p1;TRINITY_DN55_c2_g1~~TRINITY_DN55_c2_g1_i6.p1;ORF_type:5prime_partial_(+),score=19.47	0	+	1	469	0	1	1585	0	No
TRINITY_DN55_c2_g1_i2	.	+	TRINITY_DN55_c2_g1_i4	0	1500	ID=TRINITY_DN55_c2_g1_i4.p1;TRINITY_DN55_c2_g1~~TRINITY_DN55_c2_g1_i4.p1;ORF_type:5prime_partial_(+),score=19.47	0	+	1	469	0	1	1500	0	No
TRINITY_DN55_c2_g1_i2	.	+	TRINITY_DN55_c2_g1_i1	0	2161	ID=TRINITY_DN55_c2_g1_i1.p1;TRINITY_DN55_c2_g1~~TRINITY_DN55_c2_g1_i1.p1;ORF_type:5prime_partial_(+),score=4.45	0	+	1	424	0	1	2161	0	No
TRINITY_DN55_c2_g1_i2	.	-	TRINITY_DN1013_c0_g2_i1	0	2943	ID=TRINITY_DN1013_c0_g2_i1.p1;TRINITY_DN1013_c0_g2~~TRINITY_DN1013_c0_g2_i1.p1;ORF_type:complete_(-),score=47.11	0	-	2193	2847	0	1	2943	0	No
TRINITY_DN55_c2_g1_i2	.	-	TRINITY_DN2155_c0_g1_i9	0	2644	ID=TRINITY_DN2155_c0_g1_i9.p1;TRINITY_DN2155_c0_g1~~TRINITY_DN2155_c0_g1_i9.p1;ORF_type:complete_(+),score=17.31	0	+	1552	1918	0	1	2644	0	No
TRINITY_DN55_c2_g1_i2	.	-	TRINITY_DN2155_c0_g1_i9	0	2644	ID=TRINITY_DN2155_c0_g1_i9.p2;TRINITY_DN2155_c0_g1~~TRINITY_DN2155_c0_g1_i9.p2;ORF_type:complete_(+),score=23.26	0	+	371	710	0	1	2644	0	No
TRINITY_DN55_c2_g1_i2	.	-	TRINITY_DN2155_c0_g1_i7	0	1760	ID=TRINITY_DN2155_c0_g1_i7.p1;TRINITY_DN2155_c0_g1~~TRINITY_DN2155_c0_g1_i7.p1;ORF_type:complete_(+),score=41.02	0	+	371	1034	0	1	1760	0	No
TRINITY_DN55_c2_g1_i2	.	-	TRINITY_DN2155_c0_g1_i6	0	3981	ID=TRINITY_DN2155_c0_g1_i6.p1;TRINITY_DN2155_c0_g1~~TRINITY_DN2155_c0_g1_i6.p1;ORF_type:complete_(+),score=23.26	0	+	371	710	0	1	3981	0	No
TRINITY_DN55_c2_g1_i2	.	-	TRINITY_DN2155_c0_g1_i4	0	3179	ID=TRINITY_DN2155_c0_g1_i4.p2;TRINITY_DN2155_c0_g1~~TRINITY_DN2155_c0_g1_i4.p2;ORF_type:complete_(+),score=23.26	0	+	371	710	0	1	3179	0	No
TRINITY_DN55_c2_g1_i2	.	-	TRINITY_DN2155_c0_g1_i4	0	3179	ID=TRINITY_DN2155_c0_g1_i4.p1;TRINITY_DN2155_c0_g1~~TRINITY_DN2155_c0_g1_i4.p1;ORF_type:complete_(+),score=20.91	0	+	2093	2453	0	1	3179	0	No
TRINITY_DN55_c2_g1_i2	.	-	TRINITY_DN2155_c0_g1_i2	0	3609	ID=TRINITY_DN2155_c0_g1_i2.p1;TRINITY_DN2155_c0_g1~~TRINITY_DN2155_c0_g1_i2.p1;ORF_type:complete_(+),score=23.26	0	+	371	710	0	1	3609	0	No
TRINITY_DN55_c2_g1_i2	.	-	TRINITY_DN2155_c0_g1_i1	0	3872	ID=TRINITY_DN2155_c0_g1_i1.p1;TRINITY_DN2155_c0_g1~~TRINITY_DN2155_c0_g1_i1.p1;ORF_type:complete_(+),score=23.26	0	+	371	710	0	1	3872	0	No
TRINITY_DN55_c2_g1_i2	.	+	TRINITY_DN96_c1_g2_i6	0	1759	ID=TRINITY_DN96_c1_g2_i6.p1;TRINITY_DN96_c1_g2~~TRINITY_DN96_c1_g2_i6.p1;ORF_type:complete_(+),score=86.48	0	+	205	1453	0	1	1759	0	No
TRINITY_DN55_c2_g1_i2	.	+	TRINITY_DN96_c1_g2_i4	0	2507	ID=TRINITY_DN96_c1_g2_i4.p1;TRINITY_DN96_c1_g2~~TRINITY_DN96_c1_g2_i4.p1;ORF_type:complete_(+),score=86.48	0	+	205	1453	0	1	2507	0	No
TRINITY_DN55_c2_g1_i2	.	+	TRINITY_DN235_c3_g1_i7	0	1481	ID=TRINITY_DN235_c3_g1_i7.p1;TRINITY_DN235_c3_g1~~TRINITY_DN235_c3_g1_i7.p1;ORF_type:complete_(-),score=3.00	0	-	299	623	0	1	1481	0	No
TRINITY_DN55_c2_g1_i2	.	+	TRINITY_DN74_c0_g1_i9	0	4446	ID=TRINITY_DN74_c0_g1_i9.p3;TRINITY_DN74_c0_g1~~TRINITY_DN74_c0_g1_i9.p3;ORF_type:3prime_partial_(+),score=21.72	0	+	4107	4446	0	1	4446	0	No
TRINITY_DN55_c2_g1_i2	.	+	TRINITY_DN74_c0_g1_i9	0	4446	ID=TRINITY_DN74_c0_g1_i9.p1;TRINITY_DN74_c0_g1~~TRINITY_DN74_c0_g1_i9.p1;ORF_type:complete_(+),score=133.51	0	+	153	2142	0	1	4446	0	No
TRINITY_DN55_c2_g1_i2	.	+	TRINITY_DN74_c0_g1_i5	0	3715	ID=TRINITY_DN74_c0_g1_i5.p1;TRINITY_DN74_c0_g1~~TRINITY_DN74_c0_g1_i5.p1;ORF_type:complete_(+),score=133.33	0	+	153	2142	0	1	3715	0	No
TRINITY_DN55_c2_g1_i2	.	+	TRINITY_DN74_c0_g1_i5	0	3715	ID=TRINITY_DN74_c0_g1_i5.p3;TRINITY_DN74_c0_g1~~TRINITY_DN74_c0_g1_i5.p3;ORF_type:3prime_partial_(+),score=21.72	0	+	3376	3715	0	1	3715	0	No
TRINITY_DN55_c2_g1_i2	.	-	TRINITY_DN872_c0_g1_i4	0	976	ID=TRINITY_DN872_c0_g1_i4.p1;TRINITY_DN872_c0_g1~~TRINITY_DN872_c0_g1_i4.p1;ORF_type:complete_(+),score=34.30	0	+	406	739	0	1	976	0	No
TRINITY_DN55_c2_g1_i2	.	-	TRINITY_DN872_c0_g1_i2	0	970	ID=TRINITY_DN872_c0_g1_i2.p1;TRINITY_DN872_c0_g1~~TRINITY_DN872_c0_g1_i2.p1;ORF_type:complete_(+),score=34.28	0	+	407	740	0	1	970	0	No
TRINITY_DN55_c2_g1_i2	.	-	TRINITY_DN1613_c0_g1_i4	0	1815	ID=TRINITY_DN1613_c0_g1_i4.p1;TRINITY_DN1613_c0_g1~~TRINITY_DN1613_c0_g1_i4.p1;ORF_type:5prime_partial_(-),score=26.61	0	-	935	1814	0	1	1815	0	No
TRINITY_DN55_c2_g1_i2	.	+	TRINITY_DN10041_c0_g1_i7	0	1567	ID=TRINITY_DN10041_c0_g1_i7.p1;TRINITY_DN10041_c0_g1~~TRINITY_DN10041_c0_g1_i7.p1;ORF_type:complete_(+),score=39.94	0	+	123	945	0	1	1567	0	No
TRINITY_DN55_c2_g1_i2	.	+	TRINITY_DN10041_c0_g1_i6	0	3325	ID=TRINITY_DN10041_c0_g1_i6.p1;TRINITY_DN10041_c0_g1~~TRINITY_DN10041_c0_g1_i6.p1;ORF_type:complete_(+),score=34.02	0	+	2275	2656	0	1	3325	0	No
TRINITY_DN55_c2_g1_i2	.	-	TRINITY_DN3554_c2_g2_i5	0	1962	ID=TRINITY_DN3554_c2_g2_i5.p1;TRINITY_DN3554_c2_g2~~TRINITY_DN3554_c2_g2_i5.p1;ORF_type:complete_(+),score=14.81	0	+	105	510	0	1	1962	0	No
TRINITY_DN55_c2_g1_i2	.	-	TRINITY_DN3554_c2_g2_i3	0	1942	ID=TRINITY_DN3554_c2_g2_i3.p1;TRINITY_DN3554_c2_g2~~TRINITY_DN3554_c2_g2_i3.p1;ORF_type:complete_(+),score=35.55	0	+	105	822	0	1	1942	0	No
TRINITY_DN55_c2_g1_i2	.	-	TRINITY_DN3554_c2_g2_i1	0	2902	ID=TRINITY_DN3554_c2_g2_i1.p1;TRINITY_DN3554_c2_g2~~TRINITY_DN3554_c2_g2_i1.p1;ORF_type:complete_(+),score=89.61	0	+	276	1782	0	1	2902	0	No
TRINITY_DN55_c2_g1_i2	.	-	TRINITY_DN11893_c0_g1_i203	0	2843	ID=TRINITY_DN11893_c0_g1_i203.p1;TRINITY_DN11893_c0_g1~~TRINITY_DN11893_c0_g1_i203.p1;ORF_type:complete_(-),score=6.68	0	-	2210	2516	0	1	2843	0	No
TRINITY_DN55_c2_g1_i2	.	-	TRINITY_DN11893_c0_g1_i124	0	2742	ID=TRINITY_DN11893_c0_g1_i124.p1;TRINITY_DN11893_c0_g1~~TRINITY_DN11893_c0_g1_i124.p1;ORF_type:complete_(-),score=6.68	0	-	2109	2415	0	1	2742	0	No
TRINITY_DN55_c2_g1_i2	.	-	TRINITY_DN5429_c0_g1_i8	0	2585	ID=TRINITY_DN5429_c0_g1_i8.p1;TRINITY_DN5429_c0_g1~~TRINITY_DN5429_c0_g1_i8.p1;ORF_type:complete_(-),score=47.52	0	-	677	1943	0	1	2585	0	No
TRINITY_DN55_c2_g1_i2	.	-	TRINITY_DN5429_c0_g1_i3	0	4656	ID=TRINITY_DN5429_c0_g1_i3.p2;TRINITY_DN5429_c0_g1~~TRINITY_DN5429_c0_g1_i3.p2;ORF_type:complete_(-),score=23.60	0	-	3745	4339	0	1	4656	0	No
TRINITY_DN55_c2_g1_i2	.	-	TRINITY_DN5429_c0_g1_i3	0	4656	ID=TRINITY_DN5429_c0_g1_i3.p3;TRINITY_DN5429_c0_g1~~TRINITY_DN5429_c0_g1_i3.p3;ORF_type:complete_(-),score=32.83	0	-	677	1148	0	1	4656	0	No
TRINITY_DN55_c2_g1_i2	.	-	TRINITY_DN5429_c0_g1_i2	0	3001	ID=TRINITY_DN5429_c0_g1_i2.p1;TRINITY_DN5429_c0_g1~~TRINITY_DN5429_c0_g1_i2.p1;ORF_type:complete_(-),score=41.76	0	-	1153	2359	0	1	3001	0	No
TRINITY_DN55_c2_g1_i2	.	-	TRINITY_DN5429_c0_g1_i12	0	4848	ID=TRINITY_DN5429_c0_g1_i12.p3;TRINITY_DN5429_c0_g1~~TRINITY_DN5429_c0_g1_i12.p3;ORF_type:complete_(-),score=32.83	0	-	677	1148	0	1	4848	0	No
TRINITY_DN55_c2_g1_i2	.	-	TRINITY_DN5429_c0_g1_i12	0	4848	ID=TRINITY_DN5429_c0_g1_i12.p2;TRINITY_DN5429_c0_g1~~TRINITY_DN5429_c0_g1_i12.p2;ORF_type:complete_(-),score=23.60	0	-	3937	4531	0	1	4848	0	No
TRINITY_DN55_c2_g1_i2	.	-	TRINITY_DN5429_c0_g1_i10	0	2683	ID=TRINITY_DN5429_c0_g1_i10.p2;TRINITY_DN5429_c0_g1~~TRINITY_DN5429_c0_g1_i10.p2;ORF_type:complete_(-),score=40.18	0	-	677	1304	0	1	2683	0	No
TRINITY_DN55_c2_g1_i2	.	-	TRINITY_DN5429_c0_g1_i10	0	2683	ID=TRINITY_DN5429_c0_g1_i10.p3;TRINITY_DN5429_c0_g1~~TRINITY_DN5429_c0_g1_i10.p3;ORF_type:complete_(-),score=23.60	0	-	1772	2366	0	1	2683	0	No
TRINITY_DN55_c2_g1_i2	.	+	TRINITY_DN6518_c0_g1_i3	0	2652	ID=TRINITY_DN6518_c0_g1_i3.p1;TRINITY_DN6518_c0_g1~~TRINITY_DN6518_c0_g1_i3.p1;ORF_type:complete_(-),score=61.59	0	-	789	2103	0	1	2652	0	No
TRINITY_DN55_c2_g1_i2	.	+	TRINITY_DN6518_c0_g1_i2	0	2831	ID=TRINITY_DN6518_c0_g1_i2.p1;TRINITY_DN6518_c0_g1~~TRINITY_DN6518_c0_g1_i2.p1;ORF_type:complete_(-),score=94.85	0	-	789	2505	0	1	2831	0	No
TRINITY_DN55_c6_g1_i1	.	-	TRINITY_DN96_c1_g2_i4	0	2507	ID=TRINITY_DN96_c1_g2_i4.p1;TRINITY_DN96_c1_g2~~TRINITY_DN96_c1_g2_i4.p1;ORF_type:complete_(+),score=86.48	0	+	205	1453	0	1	2507	0	No
TRINITY_DN29_c0_g1_i12	.	-	TRINITY_DN13016_c0_g1_i25	0	4382	ID=TRINITY_DN13016_c0_g1_i25.p1;TRINITY_DN13016_c0_g1~~TRINITY_DN13016_c0_g1_i25.p1;ORF_type:complete_(+),score=30.77	0	+	1672	2293	0	1	4382	0	No
TRINITY_DN29_c0_g1_i12	.	-	TRINITY_DN13016_c0_g1_i12	0	2239	ID=TRINITY_DN13016_c0_g1_i12.p1;TRINITY_DN13016_c0_g1~~TRINITY_DN13016_c0_g1_i12.p1;ORF_type:complete_(+),score=86.57	0	+	420	1761	0	1	2239	0	No
TRINITY_DN29_c0_g1_i15	.	-	TRINITY_DN13016_c0_g1_i25	0	4382	ID=TRINITY_DN13016_c0_g1_i25.p1;TRINITY_DN13016_c0_g1~~TRINITY_DN13016_c0_g1_i25.p1;ORF_type:complete_(+),score=30.77	0	+	1672	2293	0	1	4382	0	No
TRINITY_DN29_c0_g1_i15	.	-	TRINITY_DN13016_c0_g1_i12	0	2239	ID=TRINITY_DN13016_c0_g1_i12.p1;TRINITY_DN13016_c0_g1~~TRINITY_DN13016_c0_g1_i12.p1;ORF_type:complete_(+),score=86.57	0	+	420	1761	0	1	2239	0	No
TRINITY_DN29_c0_g1_i19	.	-	TRINITY_DN13016_c0_g1_i25	0	4382	ID=TRINITY_DN13016_c0_g1_i25.p1;TRINITY_DN13016_c0_g1~~TRINITY_DN13016_c0_g1_i25.p1;ORF_type:complete_(+),score=30.77	0	+	1672	2293	0	1	4382	0	No
TRINITY_DN29_c0_g1_i19	.	-	TRINITY_DN13016_c0_g1_i12	0	2239	ID=TRINITY_DN13016_c0_g1_i12.p1;TRINITY_DN13016_c0_g1~~TRINITY_DN13016_c0_g1_i12.p1;ORF_type:complete_(+),score=86.57	0	+	420	1761	0	1	2239	0	No
TRINITY_DN29_c0_g1_i9	.	-	TRINITY_DN13016_c0_g1_i25	0	4382	ID=TRINITY_DN13016_c0_g1_i25.p1;TRINITY_DN13016_c0_g1~~TRINITY_DN13016_c0_g1_i25.p1;ORF_type:complete_(+),score=30.77	0	+	1672	2293	0	1	4382	0	No
TRINITY_DN29_c0_g1_i9	.	-	TRINITY_DN13016_c0_g1_i12	0	2239	ID=TRINITY_DN13016_c0_g1_i12.p1;TRINITY_DN13016_c0_g1~~TRINITY_DN13016_c0_g1_i12.p1;ORF_type:complete_(+),score=86.57	0	+	420	1761	0	1	2239	0	No
TRINITY_DN29_c2_g1_i5	.	+	TRINITY_DN7915_c0_g1_i4	0	883	ID=TRINITY_DN7915_c0_g1_i4.p1;TRINITY_DN7915_c0_g1~~TRINITY_DN7915_c0_g1_i4.p1;ORF_type:complete_(-),score=22.58	0	-	233	623	0	1	883	0	No
TRINITY_DN29_c2_g1_i5	.	-	TRINITY_DN10766_c0_g1_i16	0	1929	ID=TRINITY_DN10766_c0_g1_i16.p1;TRINITY_DN10766_c0_g1~~TRINITY_DN10766_c0_g1_i16.p1;ORF_type:complete_(-),score=54.09	0	-	468	1851	0	1	1929	0	No
TRINITY_DN29_c2_g1_i5	.	-	TRINITY_DN15130_c0_g1_i1	0	638	ID=TRINITY_DN15130_c0_g1_i1.p1;TRINITY_DN15130_c0_g1~~TRINITY_DN15130_c0_g1_i1.p1;ORF_type:complete_(-),score=24.34	0	-	62	578	0	1	638	0	No
TRINITY_DN29_c2_g1_i7	.	+	TRINITY_DN7915_c0_g1_i4	0	883	ID=TRINITY_DN7915_c0_g1_i4.p1;TRINITY_DN7915_c0_g1~~TRINITY_DN7915_c0_g1_i4.p1;ORF_type:complete_(-),score=22.58	0	-	233	623	0	1	883	0	No
TRINITY_DN29_c2_g1_i7	.	-	TRINITY_DN10766_c0_g1_i16	0	1929	ID=TRINITY_DN10766_c0_g1_i16.p1;TRINITY_DN10766_c0_g1~~TRINITY_DN10766_c0_g1_i16.p1;ORF_type:complete_(-),score=54.09	0	-	468	1851	0	1	1929	0	No
TRINITY_DN29_c2_g1_i7	.	-	TRINITY_DN15130_c0_g1_i1	0	638	ID=TRINITY_DN15130_c0_g1_i1.p1;TRINITY_DN15130_c0_g1~~TRINITY_DN15130_c0_g1_i1.p1;ORF_type:complete_(-),score=24.34	0	-	62	578	0	1	638	0	No
TRINITY_DN29_c3_g1_i10	.	-	TRINITY_DN13894_c0_g1_i4	0	610	ID=TRINITY_DN13894_c0_g1_i4.p1;TRINITY_DN13894_c0_g1~~TRINITY_DN13894_c0_g1_i4.p1;ORF_type:5prime_partial_(+),score=5.88	0	+	1	337	0	1	610	0	No
TRINITY_DN29_c3_g1_i10	.	+	TRINITY_DN1564_c0_g1_i10	0	773	ID=TRINITY_DN1564_c0_g1_i10.p1;TRINITY_DN1564_c0_g1~~TRINITY_DN1564_c0_g1_i10.p1;ORF_type:3prime_partial_(-),score=23.15	0	-	2	686	0	1	773	0	No
TRINITY_DN29_c3_g1_i10	.	+	TRINITY_DN1564_c0_g1_i4	0	2083	ID=TRINITY_DN1564_c0_g1_i4.p1;TRINITY_DN1564_c0_g1~~TRINITY_DN1564_c0_g1_i4.p1;ORF_type:complete_(-),score=45.71	0	-	679	1996	0	1	2083	0	No
TRINITY_DN29_c3_g1_i10	.	+	TRINITY_DN1564_c0_g1_i9	0	773	ID=TRINITY_DN1564_c0_g1_i9.p1;TRINITY_DN1564_c0_g1~~TRINITY_DN1564_c0_g1_i9.p1;ORF_type:3prime_partial_(-),score=26.94	0	-	2	542	0	1	773	0	No
TRINITY_DN29_c3_g1_i10	.	-	TRINITY_DN1522_c0_g1_i4	0	2110	ID=TRINITY_DN1522_c0_g1_i4.p1;TRINITY_DN1522_c0_g1~~TRINITY_DN1522_c0_g1_i4.p1;ORF_type:complete_(-),score=13.53	0	-	613	937	0	1	2110	0	No
TRINITY_DN29_c3_g1_i10	.	+	TRINITY_DN1564_c0_g1_i2	0	2081	ID=TRINITY_DN1564_c0_g1_i2.p1;TRINITY_DN1564_c0_g1~~TRINITY_DN1564_c0_g1_i2.p1;ORF_type:complete_(-),score=31.18	0	-	679	1453	0	1	2081	0	No
TRINITY_DN29_c3_g1_i10	.	+	TRINITY_DN1564_c0_g1_i2	0	2081	ID=TRINITY_DN1564_c0_g1_i2.p4;TRINITY_DN1564_c0_g1~~TRINITY_DN1564_c0_g1_i2.p4;ORF_type:complete_(-),score=20.60	0	-	1528	1852	0	1	2081	0	No
TRINITY_DN29_c3_g1_i10	.	-	TRINITY_DN13894_c0_g1_i2	0	489	ID=TRINITY_DN13894_c0_g1_i2.p1;TRINITY_DN13894_c0_g1~~TRINITY_DN13894_c0_g1_i2.p1;ORF_type:3prime_partial_(+),score=25.52	0	+	181	487	0	1	489	0	No
TRINITY_DN29_c3_g1_i10	.	+	TRINITY_DN5430_c0_g3_i1	0	3745	ID=TRINITY_DN5430_c0_g3_i1.p1;TRINITY_DN5430_c0_g3~~TRINITY_DN5430_c0_g3_i1.p1;ORF_type:complete_(-),score=3.47	0	-	2537	2846	0	1	3745	0	No
TRINITY_DN29_c3_g1_i10	.	+	TRINITY_DN5153_c1_g1_i71	0	1416	ID=TRINITY_DN5153_c1_g1_i71.p1;TRINITY_DN5153_c1_g1~~TRINITY_DN5153_c1_g1_i71.p1;ORF_type:complete_(+),score=23.15	0	+	427	736	0	1	1416	0	No
TRINITY_DN29_c3_g1_i10	.	+	TRINITY_DN5153_c1_g1_i48	0	1020	ID=TRINITY_DN5153_c1_g1_i48.p1;TRINITY_DN5153_c1_g1~~TRINITY_DN5153_c1_g1_i48.p1;ORF_type:complete_(+),score=19.56	0	+	427	823	0	1	1020	0	No
TRINITY_DN29_c3_g1_i10	.	-	TRINITY_DN3538_c4_g1_i1	0	1083	ID=TRINITY_DN3538_c4_g1_i1.p1;TRINITY_DN3538_c4_g1~~TRINITY_DN3538_c4_g1_i1.p1;ORF_type:complete_(-),score=25.04	0	-	103	694	0	1	1083	0	No
TRINITY_DN29_c3_g1_i10	.	-	TRINITY_DN2826_c5_g3_i2	0	1913	ID=TRINITY_DN2826_c5_g3_i2.p1;TRINITY_DN2826_c5_g3~~TRINITY_DN2826_c5_g3_i2.p1;ORF_type:3prime_partial_(+),score=14.30	0	+	1395	1911	0	1	1913	0	No
TRINITY_DN29_c3_g1_i10	.	-	TRINITY_DN2826_c5_g3_i2	0	1913	ID=TRINITY_DN2826_c5_g3_i2.p3;TRINITY_DN2826_c5_g3~~TRINITY_DN2826_c5_g3_i2.p3;ORF_type:complete_(+),score=12.01	0	+	422	737	0	1	1913	0	No
TRINITY_DN29_c3_g1_i10	.	-	TRINITY_DN2826_c5_g3_i1	0	1549	ID=TRINITY_DN2826_c5_g3_i1.p2;TRINITY_DN2826_c5_g3~~TRINITY_DN2826_c5_g3_i1.p2;ORF_type:complete_(+),score=12.01	0	+	422	737	0	1	1549	0	No
TRINITY_DN29_c3_g1_i10	.	+	TRINITY_DN2026_c0_g3_i7	0	2957	ID=TRINITY_DN2026_c0_g3_i7.p1;TRINITY_DN2026_c0_g3~~TRINITY_DN2026_c0_g3_i7.p1;ORF_type:complete_(-),score=11.19	0	-	555	894	0	1	2957	0	No
TRINITY_DN29_c3_g1_i10	.	+	TRINITY_DN840_c0_g1_i7	0	3940	ID=TRINITY_DN840_c0_g1_i7.p2;TRINITY_DN840_c0_g1~~TRINITY_DN840_c0_g1_i7.p2;ORF_type:complete_(-),score=24.40	0	-	2536	3280	0	1	3940	0	No
TRINITY_DN29_c3_g1_i10	.	+	TRINITY_DN840_c0_g1_i7	0	3940	ID=TRINITY_DN840_c0_g1_i7.p1;TRINITY_DN840_c0_g1~~TRINITY_DN840_c0_g1_i7.p1;ORF_type:complete_(-),score=108.17	0	-	433	2527	0	1	3940	0	No
TRINITY_DN29_c3_g1_i10	.	+	TRINITY_DN840_c0_g1_i4	0	3705	ID=TRINITY_DN840_c0_g1_i4.p2;TRINITY_DN840_c0_g1~~TRINITY_DN840_c0_g1_i4.p2;ORF_type:complete_(-),score=24.40	0	-	2301	3045	0	1	3705	0	No
TRINITY_DN29_c3_g1_i10	.	+	TRINITY_DN840_c0_g1_i4	0	3705	ID=TRINITY_DN840_c0_g1_i4.p1;TRINITY_DN840_c0_g1~~TRINITY_DN840_c0_g1_i4.p1;ORF_type:complete_(-),score=108.17	0	-	198	2292	0	1	3705	0	No
TRINITY_DN29_c3_g1_i10	.	+	TRINITY_DN840_c0_g1_i25	0	3906	ID=TRINITY_DN840_c0_g1_i25.p1;TRINITY_DN840_c0_g1~~TRINITY_DN840_c0_g1_i25.p1;ORF_type:complete_(-),score=108.15	0	-	399	2493	0	1	3906	0	No
TRINITY_DN29_c3_g1_i10	.	+	TRINITY_DN840_c0_g1_i25	0	3906	ID=TRINITY_DN840_c0_g1_i25.p2;TRINITY_DN840_c0_g1~~TRINITY_DN840_c0_g1_i25.p2;ORF_type:complete_(-),score=24.40	0	-	2502	3246	0	1	3906	0	No
TRINITY_DN29_c3_g1_i10	.	+	TRINITY_DN840_c0_g1_i2	0	3754	ID=TRINITY_DN840_c0_g1_i2.p2;TRINITY_DN840_c0_g1~~TRINITY_DN840_c0_g1_i2.p2;ORF_type:complete_(-),score=24.40	0	-	2350	3094	0	1	3754	0	No
TRINITY_DN29_c3_g1_i10	.	+	TRINITY_DN840_c0_g1_i2	0	3754	ID=TRINITY_DN840_c0_g1_i2.p1;TRINITY_DN840_c0_g1~~TRINITY_DN840_c0_g1_i2.p1;ORF_type:3prime_partial_(-),score=121.06	0	-	1	2341	0	1	3754	0	No
TRINITY_DN29_c3_g1_i10	.	+	TRINITY_DN840_c0_g1_i17	0	3862	ID=TRINITY_DN840_c0_g1_i17.p2;TRINITY_DN840_c0_g1~~TRINITY_DN840_c0_g1_i17.p2;ORF_type:complete_(-),score=24.40	0	-	2458	3202	0	1	3862	0	No
TRINITY_DN29_c3_g1_i10	.	+	TRINITY_DN840_c0_g1_i17	0	3862	ID=TRINITY_DN840_c0_g1_i17.p1;TRINITY_DN840_c0_g1~~TRINITY_DN840_c0_g1_i17.p1;ORF_type:complete_(-),score=108.17	0	-	355	2449	0	1	3862	0	No
TRINITY_DN29_c3_g1_i10	.	+	TRINITY_DN840_c0_g1_i14	0	3754	ID=TRINITY_DN840_c0_g1_i14.p1;TRINITY_DN840_c0_g1~~TRINITY_DN840_c0_g1_i14.p1;ORF_type:3prime_partial_(-),score=121.07	0	-	1	2341	0	1	3754	0	No
TRINITY_DN29_c3_g1_i10	.	+	TRINITY_DN840_c0_g1_i14	0	3754	ID=TRINITY_DN840_c0_g1_i14.p2;TRINITY_DN840_c0_g1~~TRINITY_DN840_c0_g1_i14.p2;ORF_type:complete_(-),score=24.40	0	-	2350	3094	0	1	3754	0	No
TRINITY_DN29_c3_g1_i10	.	-	TRINITY_DN4269_c1_g1_i2	0	4949	ID=TRINITY_DN4269_c1_g1_i2.p5;TRINITY_DN4269_c1_g1~~TRINITY_DN4269_c1_g1_i2.p5;ORF_type:complete_(-),score=11.49	0	-	3834	4140	0	1	4949	0	No
TRINITY_DN29_c3_g1_i10	.	-	TRINITY_DN4269_c1_g1_i2	0	4949	ID=TRINITY_DN4269_c1_g1_i2.p2;TRINITY_DN4269_c1_g1~~TRINITY_DN4269_c1_g1_i2.p2;ORF_type:complete_(-),score=5.85	0	-	2867	3317	0	1	4949	0	No
TRINITY_DN29_c3_g1_i10	.	-	TRINITY_DN4269_c1_g1_i2	0	4949	ID=TRINITY_DN4269_c1_g1_i2.p3;TRINITY_DN4269_c1_g1~~TRINITY_DN4269_c1_g1_i2.p3;ORF_type:complete_(-),score=3.85	0	-	3405	3795	0	1	4949	0	No
TRINITY_DN29_c3_g1_i10	.	-	TRINITY_DN4269_c1_g1_i2	0	4949	ID=TRINITY_DN4269_c1_g1_i2.p1;TRINITY_DN4269_c1_g1~~TRINITY_DN4269_c1_g1_i2.p1;ORF_type:complete_(-),score=23.68	0	-	1619	2102	0	1	4949	0	No
TRINITY_DN29_c3_g1_i10	.	+	TRINITY_DN6564_c0_g1_i20	0	1423	ID=TRINITY_DN6564_c0_g1_i20.p1;TRINITY_DN6564_c0_g1~~TRINITY_DN6564_c0_g1_i20.p1;ORF_type:5prime_partial_(+),score=40.85	0	+	2	518	0	1	1423	0	No
TRINITY_DN29_c3_g1_i10	.	+	TRINITY_DN6564_c0_g1_i17	0	1325	ID=TRINITY_DN6564_c0_g1_i17.p1;TRINITY_DN6564_c0_g1~~TRINITY_DN6564_c0_g1_i17.p1;ORF_type:5prime_partial_(+),score=47.97	0	+	2	581	0	1	1325	0	No
TRINITY_DN29_c3_g1_i10	.	+	TRINITY_DN6564_c0_g1_i11	0	1393	ID=TRINITY_DN6564_c0_g1_i11.p1;TRINITY_DN6564_c0_g1~~TRINITY_DN6564_c0_g1_i11.p1;ORF_type:complete_(+),score=36.70	0	+	253	649	0	1	1393	0	No
TRINITY_DN29_c3_g1_i10	.	-	TRINITY_DN4877_c3_g3_i3	0	1476	ID=TRINITY_DN4877_c3_g3_i3.p1;TRINITY_DN4877_c3_g3~~TRINITY_DN4877_c3_g3_i3.p1;ORF_type:complete_(+),score=15.54	0	+	201	708	0	1	1476	0	No
TRINITY_DN29_c3_g1_i10	.	-	TRINITY_DN4877_c3_g3_i1	0	958	ID=TRINITY_DN4877_c3_g3_i1.p1;TRINITY_DN4877_c3_g3~~TRINITY_DN4877_c3_g3_i1.p1;ORF_type:complete_(+),score=19.70	0	+	201	612	0	1	958	0	No
TRINITY_DN29_c3_g1_i10	.	-	TRINITY_DN9833_c1_g1_i1	0	613	ID=TRINITY_DN9833_c1_g1_i1.p1;TRINITY_DN9833_c1_g1~~TRINITY_DN9833_c1_g1_i1.p1;ORF_type:complete_(+),score=25.93	0	+	175	592	0	1	613	0	No
TRINITY_DN29_c3_g1_i10	.	+	TRINITY_DN125127_c0_g1_i1	0	526	ID=TRINITY_DN125127_c0_g1_i1.p1;TRINITY_DN125127_c0_g1~~TRINITY_DN125127_c0_g1_i1.p1;ORF_type:5prime_partial_(+),score=11.93	0	+	1	349	0	1	526	0	No
TRINITY_DN29_c3_g1_i10	.	+	TRINITY_DN20184_c0_g1_i1	0	1719	ID=TRINITY_DN20184_c0_g1_i1.p1;TRINITY_DN20184_c0_g1~~TRINITY_DN20184_c0_g1_i1.p1;ORF_type:complete_(+),score=11.92	0	+	745	1060	0	1	1719	0	No
TRINITY_DN29_c3_g1_i10	.	-	TRINITY_DN32408_c0_g2_i1	0	887	ID=TRINITY_DN32408_c0_g2_i1.p1;TRINITY_DN32408_c0_g2~~TRINITY_DN32408_c0_g2_i1.p1;ORF_type:complete_(-),score=10.16	0	-	469	769	0	1	887	0	No
TRINITY_DN29_c3_g1_i10	.	+	TRINITY_DN38288_c0_g1_i1	0	521	ID=TRINITY_DN38288_c0_g1_i1.p1;TRINITY_DN38288_c0_g1~~TRINITY_DN38288_c0_g1_i1.p1;ORF_type:complete_(-),score=11.82	0	-	64	397	0	1	521	0	No
TRINITY_DN29_c3_g1_i10	.	+	TRINITY_DN15121_c0_g1_i1	0	998	ID=TRINITY_DN15121_c0_g1_i1.p1;TRINITY_DN15121_c0_g1~~TRINITY_DN15121_c0_g1_i1.p1;ORF_type:complete_(+),score=21.69	0	+	476	947	0	1	998	0	No
TRINITY_DN29_c3_g1_i10	.	-	TRINITY_DN9833_c1_g1_i3	0	526	ID=TRINITY_DN9833_c1_g1_i3.p1;TRINITY_DN9833_c1_g1~~TRINITY_DN9833_c1_g1_i3.p1;ORF_type:5prime_partial_(+),score=26.87	0	+	1	505	0	1	526	0	No
TRINITY_DN29_c3_g1_i10	.	-	TRINITY_DN840_c54_g1_i1	0	747	ID=TRINITY_DN840_c54_g1_i1.p1;TRINITY_DN840_c54_g1~~TRINITY_DN840_c54_g1_i1.p1;ORF_type:5prime_partial_(+),score=12.89	0	+	0	339	0	1	747	0	No
TRINITY_DN29_c3_g1_i13	.	-	TRINITY_DN1522_c0_g1_i4	0	2110	ID=TRINITY_DN1522_c0_g1_i4.p1;TRINITY_DN1522_c0_g1~~TRINITY_DN1522_c0_g1_i4.p1;ORF_type:complete_(-),score=13.53	0	-	613	937	0	1	2110	0	No
TRINITY_DN29_c3_g1_i13	.	+	TRINITY_DN6564_c0_g1_i20	0	1423	ID=TRINITY_DN6564_c0_g1_i20.p1;TRINITY_DN6564_c0_g1~~TRINITY_DN6564_c0_g1_i20.p1;ORF_type:5prime_partial_(+),score=40.85	0	+	2	518	0	1	1423	0	No
TRINITY_DN29_c3_g1_i13	.	+	TRINITY_DN6564_c0_g1_i17	0	1325	ID=TRINITY_DN6564_c0_g1_i17.p1;TRINITY_DN6564_c0_g1~~TRINITY_DN6564_c0_g1_i17.p1;ORF_type:5prime_partial_(+),score=47.97	0	+	2	581	0	1	1325	0	No
TRINITY_DN29_c3_g1_i13	.	+	TRINITY_DN6564_c0_g1_i11	0	1393	ID=TRINITY_DN6564_c0_g1_i11.p1;TRINITY_DN6564_c0_g1~~TRINITY_DN6564_c0_g1_i11.p1;ORF_type:complete_(+),score=36.70	0	+	253	649	0	1	1393	0	No
TRINITY_DN29_c3_g1_i13	.	+	TRINITY_DN5153_c1_g1_i71	0	1416	ID=TRINITY_DN5153_c1_g1_i71.p1;TRINITY_DN5153_c1_g1~~TRINITY_DN5153_c1_g1_i71.p1;ORF_type:complete_(+),score=23.15	0	+	427	736	0	1	1416	0	No
TRINITY_DN29_c3_g1_i13	.	+	TRINITY_DN5153_c1_g1_i48	0	1020	ID=TRINITY_DN5153_c1_g1_i48.p1;TRINITY_DN5153_c1_g1~~TRINITY_DN5153_c1_g1_i48.p1;ORF_type:complete_(+),score=19.56	0	+	427	823	0	1	1020	0	No
TRINITY_DN29_c3_g1_i13	.	+	TRINITY_DN20184_c0_g1_i1	0	1719	ID=TRINITY_DN20184_c0_g1_i1.p1;TRINITY_DN20184_c0_g1~~TRINITY_DN20184_c0_g1_i1.p1;ORF_type:complete_(+),score=11.92	0	+	745	1060	0	1	1719	0	No
TRINITY_DN29_c3_g1_i13	.	-	TRINITY_DN32408_c0_g2_i1	0	887	ID=TRINITY_DN32408_c0_g2_i1.p1;TRINITY_DN32408_c0_g2~~TRINITY_DN32408_c0_g2_i1.p1;ORF_type:complete_(-),score=10.16	0	-	469	769	0	1	887	0	No
TRINITY_DN29_c3_g1_i13	.	+	TRINITY_DN125127_c0_g1_i1	0	526	ID=TRINITY_DN125127_c0_g1_i1.p1;TRINITY_DN125127_c0_g1~~TRINITY_DN125127_c0_g1_i1.p1;ORF_type:5prime_partial_(+),score=11.93	0	+	1	349	0	1	526	0	No
TRINITY_DN29_c3_g1_i13	.	+	TRINITY_DN15121_c0_g1_i1	0	998	ID=TRINITY_DN15121_c0_g1_i1.p1;TRINITY_DN15121_c0_g1~~TRINITY_DN15121_c0_g1_i1.p1;ORF_type:complete_(+),score=21.69	0	+	476	947	0	1	998	0	No
TRINITY_DN29_c3_g1_i13	.	-	TRINITY_DN13894_c0_g1_i4	0	610	ID=TRINITY_DN13894_c0_g1_i4.p1;TRINITY_DN13894_c0_g1~~TRINITY_DN13894_c0_g1_i4.p1;ORF_type:5prime_partial_(+),score=5.88	0	+	1	337	0	1	610	0	No
TRINITY_DN29_c3_g1_i13	.	+	TRINITY_DN38288_c0_g1_i1	0	521	ID=TRINITY_DN38288_c0_g1_i1.p1;TRINITY_DN38288_c0_g1~~TRINITY_DN38288_c0_g1_i1.p1;ORF_type:complete_(-),score=11.82	0	-	64	397	0	1	521	0	No
TRINITY_DN29_c3_g1_i13	.	-	TRINITY_DN840_c54_g1_i1	0	747	ID=TRINITY_DN840_c54_g1_i1.p1;TRINITY_DN840_c54_g1~~TRINITY_DN840_c54_g1_i1.p1;ORF_type:5prime_partial_(+),score=12.89	0	+	0	339	0	1	747	0	No
TRINITY_DN29_c3_g1_i16	.	-	TRINITY_DN13894_c0_g1_i4	0	610	ID=TRINITY_DN13894_c0_g1_i4.p1;TRINITY_DN13894_c0_g1~~TRINITY_DN13894_c0_g1_i4.p1;ORF_type:5prime_partial_(+),score=5.88	0	+	1	337	0	1	610	0	No
TRINITY_DN29_c3_g1_i16	.	+	TRINITY_DN1564_c0_g1_i10	0	773	ID=TRINITY_DN1564_c0_g1_i10.p1;TRINITY_DN1564_c0_g1~~TRINITY_DN1564_c0_g1_i10.p1;ORF_type:3prime_partial_(-),score=23.15	0	-	2	686	0	1	773	0	No
TRINITY_DN29_c3_g1_i16	.	+	TRINITY_DN1564_c0_g1_i4	0	2083	ID=TRINITY_DN1564_c0_g1_i4.p1;TRINITY_DN1564_c0_g1~~TRINITY_DN1564_c0_g1_i4.p1;ORF_type:complete_(-),score=45.71	0	-	679	1996	0	1	2083	0	No
TRINITY_DN29_c3_g1_i16	.	-	TRINITY_DN13894_c0_g1_i2	0	489	ID=TRINITY_DN13894_c0_g1_i2.p1;TRINITY_DN13894_c0_g1~~TRINITY_DN13894_c0_g1_i2.p1;ORF_type:3prime_partial_(+),score=25.52	0	+	181	487	0	1	489	0	No
TRINITY_DN29_c3_g1_i16	.	+	TRINITY_DN2403_c5_g1_i1	0	2815	ID=TRINITY_DN2403_c5_g1_i1.p1;TRINITY_DN2403_c5_g1~~TRINITY_DN2403_c5_g1_i1.p1;ORF_type:complete_(-),score=9.20	0	-	1184	1538	0	1	2815	0	No
TRINITY_DN29_c3_g1_i16	.	-	TRINITY_DN2826_c5_g3_i2	0	1913	ID=TRINITY_DN2826_c5_g3_i2.p1;TRINITY_DN2826_c5_g3~~TRINITY_DN2826_c5_g3_i2.p1;ORF_type:3prime_partial_(+),score=14.30	0	+	1395	1911	0	1	1913	0	No
TRINITY_DN29_c3_g1_i16	.	-	TRINITY_DN2826_c5_g3_i2	0	1913	ID=TRINITY_DN2826_c5_g3_i2.p3;TRINITY_DN2826_c5_g3~~TRINITY_DN2826_c5_g3_i2.p3;ORF_type:complete_(+),score=12.01	0	+	422	737	0	1	1913	0	No
TRINITY_DN29_c3_g1_i16	.	-	TRINITY_DN2826_c5_g3_i1	0	1549	ID=TRINITY_DN2826_c5_g3_i1.p2;TRINITY_DN2826_c5_g3~~TRINITY_DN2826_c5_g3_i1.p2;ORF_type:complete_(+),score=12.01	0	+	422	737	0	1	1549	0	No
TRINITY_DN29_c3_g1_i16	.	+	TRINITY_DN5430_c0_g3_i1	0	3745	ID=TRINITY_DN5430_c0_g3_i1.p1;TRINITY_DN5430_c0_g3~~TRINITY_DN5430_c0_g3_i1.p1;ORF_type:complete_(-),score=3.47	0	-	2537	2846	0	1	3745	0	No
TRINITY_DN29_c3_g1_i16	.	+	TRINITY_DN840_c0_g1_i7	0	3940	ID=TRINITY_DN840_c0_g1_i7.p2;TRINITY_DN840_c0_g1~~TRINITY_DN840_c0_g1_i7.p2;ORF_type:complete_(-),score=24.40	0	-	2536	3280	0	1	3940	0	No
TRINITY_DN29_c3_g1_i16	.	+	TRINITY_DN840_c0_g1_i7	0	3940	ID=TRINITY_DN840_c0_g1_i7.p1;TRINITY_DN840_c0_g1~~TRINITY_DN840_c0_g1_i7.p1;ORF_type:complete_(-),score=108.17	0	-	433	2527	0	1	3940	0	No
TRINITY_DN29_c3_g1_i16	.	+	TRINITY_DN840_c0_g1_i4	0	3705	ID=TRINITY_DN840_c0_g1_i4.p2;TRINITY_DN840_c0_g1~~TRINITY_DN840_c0_g1_i4.p2;ORF_type:complete_(-),score=24.40	0	-	2301	3045	0	1	3705	0	No
TRINITY_DN29_c3_g1_i16	.	+	TRINITY_DN840_c0_g1_i4	0	3705	ID=TRINITY_DN840_c0_g1_i4.p1;TRINITY_DN840_c0_g1~~TRINITY_DN840_c0_g1_i4.p1;ORF_type:complete_(-),score=108.17	0	-	198	2292	0	1	3705	0	No
TRINITY_DN29_c3_g1_i16	.	+	TRINITY_DN840_c0_g1_i25	0	3906	ID=TRINITY_DN840_c0_g1_i25.p1;TRINITY_DN840_c0_g1~~TRINITY_DN840_c0_g1_i25.p1;ORF_type:complete_(-),score=108.15	0	-	399	2493	0	1	3906	0	No
TRINITY_DN29_c3_g1_i16	.	+	TRINITY_DN840_c0_g1_i25	0	3906	ID=TRINITY_DN840_c0_g1_i25.p2;TRINITY_DN840_c0_g1~~TRINITY_DN840_c0_g1_i25.p2;ORF_type:complete_(-),score=24.40	0	-	2502	3246	0	1	3906	0	No
TRINITY_DN29_c3_g1_i16	.	+	TRINITY_DN840_c0_g1_i2	0	3754	ID=TRINITY_DN840_c0_g1_i2.p2;TRINITY_DN840_c0_g1~~TRINITY_DN840_c0_g1_i2.p2;ORF_type:complete_(-),score=24.40	0	-	2350	3094	0	1	3754	0	No
TRINITY_DN29_c3_g1_i16	.	+	TRINITY_DN840_c0_g1_i2	0	3754	ID=TRINITY_DN840_c0_g1_i2.p1;TRINITY_DN840_c0_g1~~TRINITY_DN840_c0_g1_i2.p1;ORF_type:3prime_partial_(-),score=121.06	0	-	1	2341	0	1	3754	0	No
TRINITY_DN29_c3_g1_i16	.	+	TRINITY_DN840_c0_g1_i17	0	3862	ID=TRINITY_DN840_c0_g1_i17.p2;TRINITY_DN840_c0_g1~~TRINITY_DN840_c0_g1_i17.p2;ORF_type:complete_(-),score=24.40	0	-	2458	3202	0	1	3862	0	No
TRINITY_DN29_c3_g1_i16	.	+	TRINITY_DN840_c0_g1_i17	0	3862	ID=TRINITY_DN840_c0_g1_i17.p1;TRINITY_DN840_c0_g1~~TRINITY_DN840_c0_g1_i17.p1;ORF_type:complete_(-),score=108.17	0	-	355	2449	0	1	3862	0	No
TRINITY_DN29_c3_g1_i16	.	+	TRINITY_DN840_c0_g1_i14	0	3754	ID=TRINITY_DN840_c0_g1_i14.p1;TRINITY_DN840_c0_g1~~TRINITY_DN840_c0_g1_i14.p1;ORF_type:3prime_partial_(-),score=121.07	0	-	1	2341	0	1	3754	0	No
TRINITY_DN29_c3_g1_i16	.	+	TRINITY_DN840_c0_g1_i14	0	3754	ID=TRINITY_DN840_c0_g1_i14.p2;TRINITY_DN840_c0_g1~~TRINITY_DN840_c0_g1_i14.p2;ORF_type:complete_(-),score=24.40	0	-	2350	3094	0	1	3754	0	No
TRINITY_DN29_c3_g1_i16	.	+	TRINITY_DN2026_c0_g3_i7	0	2957	ID=TRINITY_DN2026_c0_g3_i7.p1;TRINITY_DN2026_c0_g3~~TRINITY_DN2026_c0_g3_i7.p1;ORF_type:complete_(-),score=11.19	0	-	555	894	0	1	2957	0	No
TRINITY_DN29_c3_g1_i16	.	+	TRINITY_DN6564_c0_g1_i20	0	1423	ID=TRINITY_DN6564_c0_g1_i20.p1;TRINITY_DN6564_c0_g1~~TRINITY_DN6564_c0_g1_i20.p1;ORF_type:5prime_partial_(+),score=40.85	0	+	2	518	0	1	1423	0	No
TRINITY_DN29_c3_g1_i16	.	+	TRINITY_DN6564_c0_g1_i17	0	1325	ID=TRINITY_DN6564_c0_g1_i17.p1;TRINITY_DN6564_c0_g1~~TRINITY_DN6564_c0_g1_i17.p1;ORF_type:5prime_partial_(+),score=47.97	0	+	2	581	0	1	1325	0	No
TRINITY_DN29_c3_g1_i16	.	+	TRINITY_DN6564_c0_g1_i11	0	1393	ID=TRINITY_DN6564_c0_g1_i11.p1;TRINITY_DN6564_c0_g1~~TRINITY_DN6564_c0_g1_i11.p1;ORF_type:complete_(+),score=36.70	0	+	253	649	0	1	1393	0	No
TRINITY_DN29_c3_g1_i16	.	-	TRINITY_DN3538_c4_g1_i1	0	1083	ID=TRINITY_DN3538_c4_g1_i1.p1;TRINITY_DN3538_c4_g1~~TRINITY_DN3538_c4_g1_i1.p1;ORF_type:complete_(-),score=25.04	0	-	103	694	0	1	1083	0	No
TRINITY_DN29_c3_g1_i16	.	-	TRINITY_DN4877_c3_g3_i3	0	1476	ID=TRINITY_DN4877_c3_g3_i3.p1;TRINITY_DN4877_c3_g3~~TRINITY_DN4877_c3_g3_i3.p1;ORF_type:complete_(+),score=15.54	0	+	201	708	0	1	1476	0	No
TRINITY_DN29_c3_g1_i16	.	-	TRINITY_DN4877_c3_g3_i1	0	958	ID=TRINITY_DN4877_c3_g3_i1.p1;TRINITY_DN4877_c3_g3~~TRINITY_DN4877_c3_g3_i1.p1;ORF_type:complete_(+),score=19.70	0	+	201	612	0	1	958	0	No
TRINITY_DN29_c3_g1_i16	.	-	TRINITY_DN9833_c1_g1_i1	0	613	ID=TRINITY_DN9833_c1_g1_i1.p1;TRINITY_DN9833_c1_g1~~TRINITY_DN9833_c1_g1_i1.p1;ORF_type:complete_(+),score=25.93	0	+	175	592	0	1	613	0	No
TRINITY_DN29_c3_g1_i16	.	-	TRINITY_DN11673_c0_g1_i7	0	1734	ID=TRINITY_DN11673_c0_g1_i7.p1;TRINITY_DN11673_c0_g1~~TRINITY_DN11673_c0_g1_i7.p1;ORF_type:complete_(-),score=41.25	0	-	926	1532	0	1	1734	0	No
TRINITY_DN29_c3_g1_i16	.	-	TRINITY_DN11673_c0_g1_i7	0	1734	ID=TRINITY_DN11673_c0_g1_i7.p2;TRINITY_DN11673_c0_g1~~TRINITY_DN11673_c0_g1_i7.p2;ORF_type:complete_(-),score=28.11	0	-	370	934	0	1	1734	0	No
TRINITY_DN29_c3_g1_i16	.	-	TRINITY_DN715_c0_g1_i22	0	2024	ID=TRINITY_DN715_c0_g1_i22.p1;TRINITY_DN715_c0_g1~~TRINITY_DN715_c0_g1_i22.p1;ORF_type:complete_(-),score=12.32	0	-	489	819	0	1	2024	0	No
TRINITY_DN29_c3_g1_i16	.	-	TRINITY_DN715_c0_g1_i22	0	2024	ID=TRINITY_DN715_c0_g1_i22.p2;TRINITY_DN715_c0_g1~~TRINITY_DN715_c0_g1_i22.p2;ORF_type:complete_(-),score=17.70	0	-	1700	1991	0	1	2024	0	No
TRINITY_DN29_c3_g1_i16	.	-	TRINITY_DN715_c0_g1_i13	0	3048	ID=TRINITY_DN715_c0_g1_i13.p1;TRINITY_DN715_c0_g1~~TRINITY_DN715_c0_g1_i13.p1;ORF_type:complete_(-),score=17.70	0	-	2724	3015	0	1	3048	0	No
TRINITY_DN29_c3_g1_i16	.	-	TRINITY_DN9833_c1_g1_i3	0	526	ID=TRINITY_DN9833_c1_g1_i3.p1;TRINITY_DN9833_c1_g1~~TRINITY_DN9833_c1_g1_i3.p1;ORF_type:5prime_partial_(+),score=26.87	0	+	1	505	0	1	526	0	No
TRINITY_DN29_c3_g1_i16	.	+	TRINITY_DN14990_c0_g1_i1	0	1087	ID=TRINITY_DN14990_c0_g1_i1.p1;TRINITY_DN14990_c0_g1~~TRINITY_DN14990_c0_g1_i1.p1;ORF_type:5prime_partial_(-),score=9.88	0	-	754	1087	0	1	1087	0	No
TRINITY_DN29_c3_g1_i17	.	-	TRINITY_DN13894_c0_g1_i4	0	610	ID=TRINITY_DN13894_c0_g1_i4.p1;TRINITY_DN13894_c0_g1~~TRINITY_DN13894_c0_g1_i4.p1;ORF_type:5prime_partial_(+),score=5.88	0	+	1	337	0	1	610	0	No
TRINITY_DN29_c3_g1_i17	.	-	TRINITY_DN1522_c0_g1_i4	0	2110	ID=TRINITY_DN1522_c0_g1_i4.p1;TRINITY_DN1522_c0_g1~~TRINITY_DN1522_c0_g1_i4.p1;ORF_type:complete_(-),score=13.53	0	-	613	937	0	1	2110	0	No
TRINITY_DN29_c3_g1_i17	.	+	TRINITY_DN1564_c0_g1_i10	0	773	ID=TRINITY_DN1564_c0_g1_i10.p1;TRINITY_DN1564_c0_g1~~TRINITY_DN1564_c0_g1_i10.p1;ORF_type:3prime_partial_(-),score=23.15	0	-	2	686	0	1	773	0	No
TRINITY_DN29_c3_g1_i17	.	+	TRINITY_DN1564_c0_g1_i4	0	2083	ID=TRINITY_DN1564_c0_g1_i4.p1;TRINITY_DN1564_c0_g1~~TRINITY_DN1564_c0_g1_i4.p1;ORF_type:complete_(-),score=45.71	0	-	679	1996	0	1	2083	0	No
TRINITY_DN29_c3_g1_i17	.	+	TRINITY_DN1564_c0_g1_i9	0	773	ID=TRINITY_DN1564_c0_g1_i9.p1;TRINITY_DN1564_c0_g1~~TRINITY_DN1564_c0_g1_i9.p1;ORF_type:3prime_partial_(-),score=26.94	0	-	2	542	0	1	773	0	No
TRINITY_DN29_c3_g1_i17	.	+	TRINITY_DN1564_c0_g1_i2	0	2081	ID=TRINITY_DN1564_c0_g1_i2.p1;TRINITY_DN1564_c0_g1~~TRINITY_DN1564_c0_g1_i2.p1;ORF_type:complete_(-),score=31.18	0	-	679	1453	0	1	2081	0	No
TRINITY_DN29_c3_g1_i17	.	+	TRINITY_DN1564_c0_g1_i2	0	2081	ID=TRINITY_DN1564_c0_g1_i2.p4;TRINITY_DN1564_c0_g1~~TRINITY_DN1564_c0_g1_i2.p4;ORF_type:complete_(-),score=20.60	0	-	1528	1852	0	1	2081	0	No
TRINITY_DN29_c3_g1_i17	.	+	TRINITY_DN5153_c1_g1_i71	0	1416	ID=TRINITY_DN5153_c1_g1_i71.p1;TRINITY_DN5153_c1_g1~~TRINITY_DN5153_c1_g1_i71.p1;ORF_type:complete_(+),score=23.15	0	+	427	736	0	1	1416	0	No
TRINITY_DN29_c3_g1_i17	.	+	TRINITY_DN5153_c1_g1_i48	0	1020	ID=TRINITY_DN5153_c1_g1_i48.p1;TRINITY_DN5153_c1_g1~~TRINITY_DN5153_c1_g1_i48.p1;ORF_type:complete_(+),score=19.56	0	+	427	823	0	1	1020	0	No
TRINITY_DN29_c3_g1_i17	.	-	TRINITY_DN13894_c0_g1_i2	0	489	ID=TRINITY_DN13894_c0_g1_i2.p1;TRINITY_DN13894_c0_g1~~TRINITY_DN13894_c0_g1_i2.p1;ORF_type:3prime_partial_(+),score=25.52	0	+	181	487	0	1	489	0	No
TRINITY_DN29_c3_g1_i17	.	-	TRINITY_DN2826_c5_g3_i2	0	1913	ID=TRINITY_DN2826_c5_g3_i2.p1;TRINITY_DN2826_c5_g3~~TRINITY_DN2826_c5_g3_i2.p1;ORF_type:3prime_partial_(+),score=14.30	0	+	1395	1911	0	1	1913	0	No
TRINITY_DN29_c3_g1_i17	.	-	TRINITY_DN2826_c5_g3_i2	0	1913	ID=TRINITY_DN2826_c5_g3_i2.p3;TRINITY_DN2826_c5_g3~~TRINITY_DN2826_c5_g3_i2.p3;ORF_type:complete_(+),score=12.01	0	+	422	737	0	1	1913	0	No
TRINITY_DN29_c3_g1_i17	.	-	TRINITY_DN2826_c5_g3_i1	0	1549	ID=TRINITY_DN2826_c5_g3_i1.p2;TRINITY_DN2826_c5_g3~~TRINITY_DN2826_c5_g3_i1.p2;ORF_type:complete_(+),score=12.01	0	+	422	737	0	1	1549	0	No
TRINITY_DN29_c3_g1_i17	.	+	TRINITY_DN2026_c0_g3_i7	0	2957	ID=TRINITY_DN2026_c0_g3_i7.p1;TRINITY_DN2026_c0_g3~~TRINITY_DN2026_c0_g3_i7.p1;ORF_type:complete_(-),score=11.19	0	-	555	894	0	1	2957	0	No
TRINITY_DN29_c3_g1_i17	.	-	TRINITY_DN4269_c1_g1_i2	0	4949	ID=TRINITY_DN4269_c1_g1_i2.p5;TRINITY_DN4269_c1_g1~~TRINITY_DN4269_c1_g1_i2.p5;ORF_type:complete_(-),score=11.49	0	-	3834	4140	0	1	4949	0	No
TRINITY_DN29_c3_g1_i17	.	-	TRINITY_DN4269_c1_g1_i2	0	4949	ID=TRINITY_DN4269_c1_g1_i2.p2;TRINITY_DN4269_c1_g1~~TRINITY_DN4269_c1_g1_i2.p2;ORF_type:complete_(-),score=5.85	0	-	2867	3317	0	1	4949	0	No
TRINITY_DN29_c3_g1_i17	.	-	TRINITY_DN4269_c1_g1_i2	0	4949	ID=TRINITY_DN4269_c1_g1_i2.p3;TRINITY_DN4269_c1_g1~~TRINITY_DN4269_c1_g1_i2.p3;ORF_type:complete_(-),score=3.85	0	-	3405	3795	0	1	4949	0	No
TRINITY_DN29_c3_g1_i17	.	-	TRINITY_DN4269_c1_g1_i2	0	4949	ID=TRINITY_DN4269_c1_g1_i2.p1;TRINITY_DN4269_c1_g1~~TRINITY_DN4269_c1_g1_i2.p1;ORF_type:complete_(-),score=23.68	0	-	1619	2102	0	1	4949	0	No
TRINITY_DN29_c3_g1_i17	.	-	TRINITY_DN4877_c3_g3_i3	0	1476	ID=TRINITY_DN4877_c3_g3_i3.p1;TRINITY_DN4877_c3_g3~~TRINITY_DN4877_c3_g3_i3.p1;ORF_type:complete_(+),score=15.54	0	+	201	708	0	1	1476	0	No
TRINITY_DN29_c3_g1_i17	.	-	TRINITY_DN4877_c3_g3_i1	0	958	ID=TRINITY_DN4877_c3_g3_i1.p1;TRINITY_DN4877_c3_g3~~TRINITY_DN4877_c3_g3_i1.p1;ORF_type:complete_(+),score=19.70	0	+	201	612	0	1	958	0	No
TRINITY_DN29_c3_g1_i17	.	-	TRINITY_DN9833_c1_g1_i1	0	613	ID=TRINITY_DN9833_c1_g1_i1.p1;TRINITY_DN9833_c1_g1~~TRINITY_DN9833_c1_g1_i1.p1;ORF_type:complete_(+),score=25.93	0	+	175	592	0	1	613	0	No
TRINITY_DN29_c3_g1_i17	.	+	TRINITY_DN125127_c0_g1_i1	0	526	ID=TRINITY_DN125127_c0_g1_i1.p1;TRINITY_DN125127_c0_g1~~TRINITY_DN125127_c0_g1_i1.p1;ORF_type:5prime_partial_(+),score=11.93	0	+	1	349	0	1	526	0	No
TRINITY_DN29_c3_g1_i17	.	+	TRINITY_DN20184_c0_g1_i1	0	1719	ID=TRINITY_DN20184_c0_g1_i1.p1;TRINITY_DN20184_c0_g1~~TRINITY_DN20184_c0_g1_i1.p1;ORF_type:complete_(+),score=11.92	0	+	745	1060	0	1	1719	0	No
TRINITY_DN29_c3_g1_i17	.	-	TRINITY_DN32408_c0_g2_i1	0	887	ID=TRINITY_DN32408_c0_g2_i1.p1;TRINITY_DN32408_c0_g2~~TRINITY_DN32408_c0_g2_i1.p1;ORF_type:complete_(-),score=10.16	0	-	469	769	0	1	887	0	No
TRINITY_DN29_c3_g1_i17	.	+	TRINITY_DN38288_c0_g1_i1	0	521	ID=TRINITY_DN38288_c0_g1_i1.p1;TRINITY_DN38288_c0_g1~~TRINITY_DN38288_c0_g1_i1.p1;ORF_type:complete_(-),score=11.82	0	-	64	397	0	1	521	0	No
TRINITY_DN29_c3_g1_i17	.	+	TRINITY_DN15121_c0_g1_i1	0	998	ID=TRINITY_DN15121_c0_g1_i1.p1;TRINITY_DN15121_c0_g1~~TRINITY_DN15121_c0_g1_i1.p1;ORF_type:complete_(+),score=21.69	0	+	476	947	0	1	998	0	No
TRINITY_DN29_c3_g1_i17	.	-	TRINITY_DN9833_c1_g1_i3	0	526	ID=TRINITY_DN9833_c1_g1_i3.p1;TRINITY_DN9833_c1_g1~~TRINITY_DN9833_c1_g1_i3.p1;ORF_type:5prime_partial_(+),score=26.87	0	+	1	505	0	1	526	0	No
TRINITY_DN29_c3_g1_i17	.	-	TRINITY_DN840_c54_g1_i1	0	747	ID=TRINITY_DN840_c54_g1_i1.p1;TRINITY_DN840_c54_g1~~TRINITY_DN840_c54_g1_i1.p1;ORF_type:5prime_partial_(+),score=12.89	0	+	0	339	0	1	747	0	No
TRINITY_DN29_c3_g1_i18	.	-	TRINITY_DN13894_c0_g1_i4	0	610	ID=TRINITY_DN13894_c0_g1_i4.p1;TRINITY_DN13894_c0_g1~~TRINITY_DN13894_c0_g1_i4.p1;ORF_type:5prime_partial_(+),score=5.88	0	+	1	337	0	1	610	0	No
TRINITY_DN29_c3_g1_i18	.	+	TRINITY_DN1564_c0_g1_i10	0	773	ID=TRINITY_DN1564_c0_g1_i10.p1;TRINITY_DN1564_c0_g1~~TRINITY_DN1564_c0_g1_i10.p1;ORF_type:3prime_partial_(-),score=23.15	0	-	2	686	0	1	773	0	No
TRINITY_DN29_c3_g1_i18	.	+	TRINITY_DN1564_c0_g1_i4	0	2083	ID=TRINITY_DN1564_c0_g1_i4.p1;TRINITY_DN1564_c0_g1~~TRINITY_DN1564_c0_g1_i4.p1;ORF_type:complete_(-),score=45.71	0	-	679	1996	0	1	2083	0	No
TRINITY_DN29_c3_g1_i18	.	-	TRINITY_DN13894_c0_g1_i2	0	489	ID=TRINITY_DN13894_c0_g1_i2.p1;TRINITY_DN13894_c0_g1~~TRINITY_DN13894_c0_g1_i2.p1;ORF_type:3prime_partial_(+),score=25.52	0	+	181	487	0	1	489	0	No
TRINITY_DN29_c3_g1_i18	.	+	TRINITY_DN2403_c5_g1_i1	0	2815	ID=TRINITY_DN2403_c5_g1_i1.p1;TRINITY_DN2403_c5_g1~~TRINITY_DN2403_c5_g1_i1.p1;ORF_type:complete_(-),score=9.20	0	-	1184	1538	0	1	2815	0	No
TRINITY_DN29_c3_g1_i18	.	-	TRINITY_DN2826_c5_g3_i2	0	1913	ID=TRINITY_DN2826_c5_g3_i2.p1;TRINITY_DN2826_c5_g3~~TRINITY_DN2826_c5_g3_i2.p1;ORF_type:3prime_partial_(+),score=14.30	0	+	1395	1911	0	1	1913	0	No
TRINITY_DN29_c3_g1_i18	.	-	TRINITY_DN2826_c5_g3_i2	0	1913	ID=TRINITY_DN2826_c5_g3_i2.p3;TRINITY_DN2826_c5_g3~~TRINITY_DN2826_c5_g3_i2.p3;ORF_type:complete_(+),score=12.01	0	+	422	737	0	1	1913	0	No
TRINITY_DN29_c3_g1_i18	.	-	TRINITY_DN2826_c5_g3_i1	0	1549	ID=TRINITY_DN2826_c5_g3_i1.p2;TRINITY_DN2826_c5_g3~~TRINITY_DN2826_c5_g3_i1.p2;ORF_type:complete_(+),score=12.01	0	+	422	737	0	1	1549	0	No
TRINITY_DN29_c3_g1_i18	.	+	TRINITY_DN5430_c0_g3_i1	0	3745	ID=TRINITY_DN5430_c0_g3_i1.p1;TRINITY_DN5430_c0_g3~~TRINITY_DN5430_c0_g3_i1.p1;ORF_type:complete_(-),score=3.47	0	-	2537	2846	0	1	3745	0	No
TRINITY_DN29_c3_g1_i18	.	+	TRINITY_DN840_c0_g1_i7	0	3940	ID=TRINITY_DN840_c0_g1_i7.p2;TRINITY_DN840_c0_g1~~TRINITY_DN840_c0_g1_i7.p2;ORF_type:complete_(-),score=24.40	0	-	2536	3280	0	1	3940	0	No
TRINITY_DN29_c3_g1_i18	.	+	TRINITY_DN840_c0_g1_i7	0	3940	ID=TRINITY_DN840_c0_g1_i7.p1;TRINITY_DN840_c0_g1~~TRINITY_DN840_c0_g1_i7.p1;ORF_type:complete_(-),score=108.17	0	-	433	2527	0	1	3940	0	No
TRINITY_DN29_c3_g1_i18	.	+	TRINITY_DN840_c0_g1_i4	0	3705	ID=TRINITY_DN840_c0_g1_i4.p2;TRINITY_DN840_c0_g1~~TRINITY_DN840_c0_g1_i4.p2;ORF_type:complete_(-),score=24.40	0	-	2301	3045	0	1	3705	0	No
TRINITY_DN29_c3_g1_i18	.	+	TRINITY_DN840_c0_g1_i4	0	3705	ID=TRINITY_DN840_c0_g1_i4.p1;TRINITY_DN840_c0_g1~~TRINITY_DN840_c0_g1_i4.p1;ORF_type:complete_(-),score=108.17	0	-	198	2292	0	1	3705	0	No
TRINITY_DN29_c3_g1_i18	.	+	TRINITY_DN840_c0_g1_i25	0	3906	ID=TRINITY_DN840_c0_g1_i25.p1;TRINITY_DN840_c0_g1~~TRINITY_DN840_c0_g1_i25.p1;ORF_type:complete_(-),score=108.15	0	-	399	2493	0	1	3906	0	No
TRINITY_DN29_c3_g1_i18	.	+	TRINITY_DN840_c0_g1_i25	0	3906	ID=TRINITY_DN840_c0_g1_i25.p2;TRINITY_DN840_c0_g1~~TRINITY_DN840_c0_g1_i25.p2;ORF_type:complete_(-),score=24.40	0	-	2502	3246	0	1	3906	0	No
TRINITY_DN29_c3_g1_i18	.	+	TRINITY_DN840_c0_g1_i2	0	3754	ID=TRINITY_DN840_c0_g1_i2.p2;TRINITY_DN840_c0_g1~~TRINITY_DN840_c0_g1_i2.p2;ORF_type:complete_(-),score=24.40	0	-	2350	3094	0	1	3754	0	No
TRINITY_DN29_c3_g1_i18	.	+	TRINITY_DN840_c0_g1_i2	0	3754	ID=TRINITY_DN840_c0_g1_i2.p1;TRINITY_DN840_c0_g1~~TRINITY_DN840_c0_g1_i2.p1;ORF_type:3prime_partial_(-),score=121.06	0	-	1	2341	0	1	3754	0	No
TRINITY_DN29_c3_g1_i18	.	+	TRINITY_DN840_c0_g1_i17	0	3862	ID=TRINITY_DN840_c0_g1_i17.p2;TRINITY_DN840_c0_g1~~TRINITY_DN840_c0_g1_i17.p2;ORF_type:complete_(-),score=24.40	0	-	2458	3202	0	1	3862	0	No
TRINITY_DN29_c3_g1_i18	.	+	TRINITY_DN840_c0_g1_i17	0	3862	ID=TRINITY_DN840_c0_g1_i17.p1;TRINITY_DN840_c0_g1~~TRINITY_DN840_c0_g1_i17.p1;ORF_type:complete_(-),score=108.17	0	-	355	2449	0	1	3862	0	No
TRINITY_DN29_c3_g1_i18	.	+	TRINITY_DN840_c0_g1_i14	0	3754	ID=TRINITY_DN840_c0_g1_i14.p1;TRINITY_DN840_c0_g1~~TRINITY_DN840_c0_g1_i14.p1;ORF_type:3prime_partial_(-),score=121.07	0	-	1	2341	0	1	3754	0	No
TRINITY_DN29_c3_g1_i18	.	+	TRINITY_DN840_c0_g1_i14	0	3754	ID=TRINITY_DN840_c0_g1_i14.p2;TRINITY_DN840_c0_g1~~TRINITY_DN840_c0_g1_i14.p2;ORF_type:complete_(-),score=24.40	0	-	2350	3094	0	1	3754	0	No
TRINITY_DN29_c3_g1_i18	.	+	TRINITY_DN2026_c0_g3_i7	0	2957	ID=TRINITY_DN2026_c0_g3_i7.p1;TRINITY_DN2026_c0_g3~~TRINITY_DN2026_c0_g3_i7.p1;ORF_type:complete_(-),score=11.19	0	-	555	894	0	1	2957	0	No
TRINITY_DN29_c3_g1_i18	.	+	TRINITY_DN6564_c0_g1_i20	0	1423	ID=TRINITY_DN6564_c0_g1_i20.p1;TRINITY_DN6564_c0_g1~~TRINITY_DN6564_c0_g1_i20.p1;ORF_type:5prime_partial_(+),score=40.85	0	+	2	518	0	1	1423	0	No
TRINITY_DN29_c3_g1_i18	.	+	TRINITY_DN6564_c0_g1_i17	0	1325	ID=TRINITY_DN6564_c0_g1_i17.p1;TRINITY_DN6564_c0_g1~~TRINITY_DN6564_c0_g1_i17.p1;ORF_type:5prime_partial_(+),score=47.97	0	+	2	581	0	1	1325	0	No
TRINITY_DN29_c3_g1_i18	.	+	TRINITY_DN6564_c0_g1_i11	0	1393	ID=TRINITY_DN6564_c0_g1_i11.p1;TRINITY_DN6564_c0_g1~~TRINITY_DN6564_c0_g1_i11.p1;ORF_type:complete_(+),score=36.70	0	+	253	649	0	1	1393	0	No
TRINITY_DN29_c3_g1_i18	.	-	TRINITY_DN3538_c4_g1_i1	0	1083	ID=TRINITY_DN3538_c4_g1_i1.p1;TRINITY_DN3538_c4_g1~~TRINITY_DN3538_c4_g1_i1.p1;ORF_type:complete_(-),score=25.04	0	-	103	694	0	1	1083	0	No
TRINITY_DN29_c3_g1_i18	.	-	TRINITY_DN4877_c3_g3_i3	0	1476	ID=TRINITY_DN4877_c3_g3_i3.p1;TRINITY_DN4877_c3_g3~~TRINITY_DN4877_c3_g3_i3.p1;ORF_type:complete_(+),score=15.54	0	+	201	708	0	1	1476	0	No
TRINITY_DN29_c3_g1_i18	.	-	TRINITY_DN4877_c3_g3_i1	0	958	ID=TRINITY_DN4877_c3_g3_i1.p1;TRINITY_DN4877_c3_g3~~TRINITY_DN4877_c3_g3_i1.p1;ORF_type:complete_(+),score=19.70	0	+	201	612	0	1	958	0	No
TRINITY_DN29_c3_g1_i18	.	-	TRINITY_DN9833_c1_g1_i1	0	613	ID=TRINITY_DN9833_c1_g1_i1.p1;TRINITY_DN9833_c1_g1~~TRINITY_DN9833_c1_g1_i1.p1;ORF_type:complete_(+),score=25.93	0	+	175	592	0	1	613	0	No
TRINITY_DN29_c3_g1_i18	.	-	TRINITY_DN11673_c0_g1_i7	0	1734	ID=TRINITY_DN11673_c0_g1_i7.p1;TRINITY_DN11673_c0_g1~~TRINITY_DN11673_c0_g1_i7.p1;ORF_type:complete_(-),score=41.25	0	-	926	1532	0	1	1734	0	No
TRINITY_DN29_c3_g1_i18	.	-	TRINITY_DN11673_c0_g1_i7	0	1734	ID=TRINITY_DN11673_c0_g1_i7.p2;TRINITY_DN11673_c0_g1~~TRINITY_DN11673_c0_g1_i7.p2;ORF_type:complete_(-),score=28.11	0	-	370	934	0	1	1734	0	No
TRINITY_DN29_c3_g1_i18	.	-	TRINITY_DN715_c0_g1_i22	0	2024	ID=TRINITY_DN715_c0_g1_i22.p1;TRINITY_DN715_c0_g1~~TRINITY_DN715_c0_g1_i22.p1;ORF_type:complete_(-),score=12.32	0	-	489	819	0	1	2024	0	No
TRINITY_DN29_c3_g1_i18	.	-	TRINITY_DN715_c0_g1_i22	0	2024	ID=TRINITY_DN715_c0_g1_i22.p2;TRINITY_DN715_c0_g1~~TRINITY_DN715_c0_g1_i22.p2;ORF_type:complete_(-),score=17.70	0	-	1700	1991	0	1	2024	0	No
TRINITY_DN29_c3_g1_i18	.	-	TRINITY_DN715_c0_g1_i13	0	3048	ID=TRINITY_DN715_c0_g1_i13.p1;TRINITY_DN715_c0_g1~~TRINITY_DN715_c0_g1_i13.p1;ORF_type:complete_(-),score=17.70	0	-	2724	3015	0	1	3048	0	No
TRINITY_DN29_c3_g1_i18	.	-	TRINITY_DN9833_c1_g1_i3	0	526	ID=TRINITY_DN9833_c1_g1_i3.p1;TRINITY_DN9833_c1_g1~~TRINITY_DN9833_c1_g1_i3.p1;ORF_type:5prime_partial_(+),score=26.87	0	+	1	505	0	1	526	0	No
TRINITY_DN29_c3_g1_i18	.	+	TRINITY_DN14990_c0_g1_i1	0	1087	ID=TRINITY_DN14990_c0_g1_i1.p1;TRINITY_DN14990_c0_g1~~TRINITY_DN14990_c0_g1_i1.p1;ORF_type:5prime_partial_(-),score=9.88	0	-	754	1087	0	1	1087	0	No
TRINITY_DN29_c3_g1_i19	.	-	TRINITY_DN13894_c0_g1_i4	0	610	ID=TRINITY_DN13894_c0_g1_i4.p1;TRINITY_DN13894_c0_g1~~TRINITY_DN13894_c0_g1_i4.p1;ORF_type:5prime_partial_(+),score=5.88	0	+	1	337	0	1	610	0	No
TRINITY_DN29_c3_g1_i19	.	+	TRINITY_DN1564_c0_g1_i10	0	773	ID=TRINITY_DN1564_c0_g1_i10.p1;TRINITY_DN1564_c0_g1~~TRINITY_DN1564_c0_g1_i10.p1;ORF_type:3prime_partial_(-),score=23.15	0	-	2	686	0	1	773	0	No
TRINITY_DN29_c3_g1_i19	.	+	TRINITY_DN1564_c0_g1_i4	0	2083	ID=TRINITY_DN1564_c0_g1_i4.p1;TRINITY_DN1564_c0_g1~~TRINITY_DN1564_c0_g1_i4.p1;ORF_type:complete_(-),score=45.71	0	-	679	1996	0	1	2083	0	No
TRINITY_DN29_c3_g1_i19	.	-	TRINITY_DN13894_c0_g1_i2	0	489	ID=TRINITY_DN13894_c0_g1_i2.p1;TRINITY_DN13894_c0_g1~~TRINITY_DN13894_c0_g1_i2.p1;ORF_type:3prime_partial_(+),score=25.52	0	+	181	487	0	1	489	0	No
TRINITY_DN29_c3_g1_i19	.	+	TRINITY_DN840_c0_g1_i7	0	3940	ID=TRINITY_DN840_c0_g1_i7.p2;TRINITY_DN840_c0_g1~~TRINITY_DN840_c0_g1_i7.p2;ORF_type:complete_(-),score=24.40	0	-	2536	3280	0	1	3940	0	No
TRINITY_DN29_c3_g1_i19	.	+	TRINITY_DN840_c0_g1_i7	0	3940	ID=TRINITY_DN840_c0_g1_i7.p1;TRINITY_DN840_c0_g1~~TRINITY_DN840_c0_g1_i7.p1;ORF_type:complete_(-),score=108.17	0	-	433	2527	0	1	3940	0	No
TRINITY_DN29_c3_g1_i19	.	+	TRINITY_DN840_c0_g1_i4	0	3705	ID=TRINITY_DN840_c0_g1_i4.p2;TRINITY_DN840_c0_g1~~TRINITY_DN840_c0_g1_i4.p2;ORF_type:complete_(-),score=24.40	0	-	2301	3045	0	1	3705	0	No
TRINITY_DN29_c3_g1_i19	.	+	TRINITY_DN840_c0_g1_i4	0	3705	ID=TRINITY_DN840_c0_g1_i4.p1;TRINITY_DN840_c0_g1~~TRINITY_DN840_c0_g1_i4.p1;ORF_type:complete_(-),score=108.17	0	-	198	2292	0	1	3705	0	No
TRINITY_DN29_c3_g1_i19	.	+	TRINITY_DN840_c0_g1_i25	0	3906	ID=TRINITY_DN840_c0_g1_i25.p1;TRINITY_DN840_c0_g1~~TRINITY_DN840_c0_g1_i25.p1;ORF_type:complete_(-),score=108.15	0	-	399	2493	0	1	3906	0	No
TRINITY_DN29_c3_g1_i19	.	+	TRINITY_DN840_c0_g1_i25	0	3906	ID=TRINITY_DN840_c0_g1_i25.p2;TRINITY_DN840_c0_g1~~TRINITY_DN840_c0_g1_i25.p2;ORF_type:complete_(-),score=24.40	0	-	2502	3246	0	1	3906	0	No
TRINITY_DN29_c3_g1_i19	.	+	TRINITY_DN840_c0_g1_i2	0	3754	ID=TRINITY_DN840_c0_g1_i2.p2;TRINITY_DN840_c0_g1~~TRINITY_DN840_c0_g1_i2.p2;ORF_type:complete_(-),score=24.40	0	-	2350	3094	0	1	3754	0	No
TRINITY_DN29_c3_g1_i19	.	+	TRINITY_DN840_c0_g1_i2	0	3754	ID=TRINITY_DN840_c0_g1_i2.p1;TRINITY_DN840_c0_g1~~TRINITY_DN840_c0_g1_i2.p1;ORF_type:3prime_partial_(-),score=121.06	0	-	1	2341	0	1	3754	0	No
TRINITY_DN29_c3_g1_i19	.	+	TRINITY_DN840_c0_g1_i17	0	3862	ID=TRINITY_DN840_c0_g1_i17.p2;TRINITY_DN840_c0_g1~~TRINITY_DN840_c0_g1_i17.p2;ORF_type:complete_(-),score=24.40	0	-	2458	3202	0	1	3862	0	No
TRINITY_DN29_c3_g1_i19	.	+	TRINITY_DN840_c0_g1_i17	0	3862	ID=TRINITY_DN840_c0_g1_i17.p1;TRINITY_DN840_c0_g1~~TRINITY_DN840_c0_g1_i17.p1;ORF_type:complete_(-),score=108.17	0	-	355	2449	0	1	3862	0	No
TRINITY_DN29_c3_g1_i19	.	+	TRINITY_DN840_c0_g1_i14	0	3754	ID=TRINITY_DN840_c0_g1_i14.p1;TRINITY_DN840_c0_g1~~TRINITY_DN840_c0_g1_i14.p1;ORF_type:3prime_partial_(-),score=121.07	0	-	1	2341	0	1	3754	0	No
TRINITY_DN29_c3_g1_i19	.	+	TRINITY_DN840_c0_g1_i14	0	3754	ID=TRINITY_DN840_c0_g1_i14.p2;TRINITY_DN840_c0_g1~~TRINITY_DN840_c0_g1_i14.p2;ORF_type:complete_(-),score=24.40	0	-	2350	3094	0	1	3754	0	No
TRINITY_DN29_c3_g1_i19	.	+	TRINITY_DN2403_c5_g1_i1	0	2815	ID=TRINITY_DN2403_c5_g1_i1.p1;TRINITY_DN2403_c5_g1~~TRINITY_DN2403_c5_g1_i1.p1;ORF_type:complete_(-),score=9.20	0	-	1184	1538	0	1	2815	0	No
TRINITY_DN29_c3_g1_i19	.	-	TRINITY_DN2826_c5_g3_i2	0	1913	ID=TRINITY_DN2826_c5_g3_i2.p1;TRINITY_DN2826_c5_g3~~TRINITY_DN2826_c5_g3_i2.p1;ORF_type:3prime_partial_(+),score=14.30	0	+	1395	1911	0	1	1913	0	No
TRINITY_DN29_c3_g1_i19	.	-	TRINITY_DN2826_c5_g3_i2	0	1913	ID=TRINITY_DN2826_c5_g3_i2.p3;TRINITY_DN2826_c5_g3~~TRINITY_DN2826_c5_g3_i2.p3;ORF_type:complete_(+),score=12.01	0	+	422	737	0	1	1913	0	No
TRINITY_DN29_c3_g1_i19	.	-	TRINITY_DN2826_c5_g3_i1	0	1549	ID=TRINITY_DN2826_c5_g3_i1.p2;TRINITY_DN2826_c5_g3~~TRINITY_DN2826_c5_g3_i1.p2;ORF_type:complete_(+),score=12.01	0	+	422	737	0	1	1549	0	No
TRINITY_DN29_c3_g1_i19	.	+	TRINITY_DN3952_c0_g2_i1	0	3802	ID=TRINITY_DN3952_c0_g2_i1.p1;TRINITY_DN3952_c0_g2~~TRINITY_DN3952_c0_g2_i1.p1;ORF_type:complete_(-),score=19.11	0	-	1211	1640	0	1	3802	0	No
TRINITY_DN29_c3_g1_i19	.	+	TRINITY_DN5430_c0_g3_i1	0	3745	ID=TRINITY_DN5430_c0_g3_i1.p1;TRINITY_DN5430_c0_g3~~TRINITY_DN5430_c0_g3_i1.p1;ORF_type:complete_(-),score=3.47	0	-	2537	2846	0	1	3745	0	No
TRINITY_DN29_c3_g1_i19	.	+	TRINITY_DN2026_c0_g3_i7	0	2957	ID=TRINITY_DN2026_c0_g3_i7.p1;TRINITY_DN2026_c0_g3~~TRINITY_DN2026_c0_g3_i7.p1;ORF_type:complete_(-),score=11.19	0	-	555	894	0	1	2957	0	No
TRINITY_DN29_c3_g1_i19	.	-	TRINITY_DN3538_c4_g1_i1	0	1083	ID=TRINITY_DN3538_c4_g1_i1.p1;TRINITY_DN3538_c4_g1~~TRINITY_DN3538_c4_g1_i1.p1;ORF_type:complete_(-),score=25.04	0	-	103	694	0	1	1083	0	No
TRINITY_DN29_c3_g1_i19	.	-	TRINITY_DN4877_c3_g3_i3	0	1476	ID=TRINITY_DN4877_c3_g3_i3.p1;TRINITY_DN4877_c3_g3~~TRINITY_DN4877_c3_g3_i3.p1;ORF_type:complete_(+),score=15.54	0	+	201	708	0	1	1476	0	No
TRINITY_DN29_c3_g1_i19	.	-	TRINITY_DN4877_c3_g3_i1	0	958	ID=TRINITY_DN4877_c3_g3_i1.p1;TRINITY_DN4877_c3_g3~~TRINITY_DN4877_c3_g3_i1.p1;ORF_type:complete_(+),score=19.70	0	+	201	612	0	1	958	0	No
TRINITY_DN29_c3_g1_i19	.	-	TRINITY_DN9833_c1_g1_i1	0	613	ID=TRINITY_DN9833_c1_g1_i1.p1;TRINITY_DN9833_c1_g1~~TRINITY_DN9833_c1_g1_i1.p1;ORF_type:complete_(+),score=25.93	0	+	175	592	0	1	613	0	No
TRINITY_DN29_c3_g1_i19	.	-	TRINITY_DN12088_c1_g2_i1	0	707	ID=TRINITY_DN12088_c1_g2_i1.p1;TRINITY_DN12088_c1_g2~~TRINITY_DN12088_c1_g2_i1.p1;ORF_type:complete_(-),score=3.70	0	-	200	500	0	1	707	0	No
TRINITY_DN29_c3_g1_i19	.	-	TRINITY_DN11673_c0_g1_i7	0	1734	ID=TRINITY_DN11673_c0_g1_i7.p1;TRINITY_DN11673_c0_g1~~TRINITY_DN11673_c0_g1_i7.p1;ORF_type:complete_(-),score=41.25	0	-	926	1532	0	1	1734	0	No
TRINITY_DN29_c3_g1_i19	.	-	TRINITY_DN11673_c0_g1_i7	0	1734	ID=TRINITY_DN11673_c0_g1_i7.p2;TRINITY_DN11673_c0_g1~~TRINITY_DN11673_c0_g1_i7.p2;ORF_type:complete_(-),score=28.11	0	-	370	934	0	1	1734	0	No
TRINITY_DN29_c3_g1_i19	.	-	TRINITY_DN5982_c1_g1_i9	0	2936	ID=TRINITY_DN5982_c1_g1_i9.p1;TRINITY_DN5982_c1_g1~~TRINITY_DN5982_c1_g1_i9.p1;ORF_type:5prime_partial_(-),score=38.42	0	-	2435	2936	0	1	2936	0	No
TRINITY_DN29_c3_g1_i19	.	-	TRINITY_DN5982_c1_g1_i40	0	4320	ID=TRINITY_DN5982_c1_g1_i40.p1;TRINITY_DN5982_c1_g1~~TRINITY_DN5982_c1_g1_i40.p1;ORF_type:5prime_partial_(-),score=42.42	0	-	3630	4320	0	1	4320	0	No
TRINITY_DN29_c3_g1_i19	.	-	TRINITY_DN5982_c1_g1_i38	0	4394	ID=TRINITY_DN5982_c1_g1_i38.p1;TRINITY_DN5982_c1_g1~~TRINITY_DN5982_c1_g1_i38.p1;ORF_type:5prime_partial_(-),score=42.42	0	-	3704	4394	0	1	4394	0	No
TRINITY_DN29_c3_g1_i19	.	-	TRINITY_DN5982_c1_g1_i25	0	2279	ID=TRINITY_DN5982_c1_g1_i25.p1;TRINITY_DN5982_c1_g1~~TRINITY_DN5982_c1_g1_i25.p1;ORF_type:complete_(-),score=96.47	0	-	626	2159	0	1	2279	0	No
TRINITY_DN29_c3_g1_i19	.	-	TRINITY_DN5982_c1_g1_i21	0	2189	ID=TRINITY_DN5982_c1_g1_i21.p1;TRINITY_DN5982_c1_g1~~TRINITY_DN5982_c1_g1_i21.p1;ORF_type:complete_(-),score=95.72	0	-	626	2069	0	1	2189	0	No
TRINITY_DN29_c3_g1_i19	.	-	TRINITY_DN5982_c1_g1_i13	0	3070	ID=TRINITY_DN5982_c1_g1_i13.p1;TRINITY_DN5982_c1_g1~~TRINITY_DN5982_c1_g1_i13.p1;ORF_type:5prime_partial_(-),score=41.66	0	-	2470	3070	0	1	3070	0	No
TRINITY_DN29_c3_g1_i19	.	-	TRINITY_DN5982_c1_g1_i1	0	2698	ID=TRINITY_DN5982_c1_g1_i1.p1;TRINITY_DN5982_c1_g1~~TRINITY_DN5982_c1_g1_i1.p1;ORF_type:complete_(-),score=96.15	0	-	1255	2578	0	1	2698	0	No
TRINITY_DN29_c3_g1_i19	.	-	TRINITY_DN715_c0_g1_i22	0	2024	ID=TRINITY_DN715_c0_g1_i22.p1;TRINITY_DN715_c0_g1~~TRINITY_DN715_c0_g1_i22.p1;ORF_type:complete_(-),score=12.32	0	-	489	819	0	1	2024	0	No
TRINITY_DN29_c3_g1_i19	.	-	TRINITY_DN715_c0_g1_i22	0	2024	ID=TRINITY_DN715_c0_g1_i22.p2;TRINITY_DN715_c0_g1~~TRINITY_DN715_c0_g1_i22.p2;ORF_type:complete_(-),score=17.70	0	-	1700	1991	0	1	2024	0	No
TRINITY_DN29_c3_g1_i19	.	-	TRINITY_DN715_c0_g1_i13	0	3048	ID=TRINITY_DN715_c0_g1_i13.p1;TRINITY_DN715_c0_g1~~TRINITY_DN715_c0_g1_i13.p1;ORF_type:complete_(-),score=17.70	0	-	2724	3015	0	1	3048	0	No
TRINITY_DN29_c3_g1_i19	.	-	TRINITY_DN9833_c1_g1_i3	0	526	ID=TRINITY_DN9833_c1_g1_i3.p1;TRINITY_DN9833_c1_g1~~TRINITY_DN9833_c1_g1_i3.p1;ORF_type:5prime_partial_(+),score=26.87	0	+	1	505	0	1	526	0	No
TRINITY_DN29_c3_g1_i19	.	+	TRINITY_DN14990_c0_g1_i1	0	1087	ID=TRINITY_DN14990_c0_g1_i1.p1;TRINITY_DN14990_c0_g1~~TRINITY_DN14990_c0_g1_i1.p1;ORF_type:5prime_partial_(-),score=9.88	0	-	754	1087	0	1	1087	0	No
TRINITY_DN29_c3_g1_i7	.	-	TRINITY_DN13894_c0_g1_i4	0	610	ID=TRINITY_DN13894_c0_g1_i4.p1;TRINITY_DN13894_c0_g1~~TRINITY_DN13894_c0_g1_i4.p1;ORF_type:5prime_partial_(+),score=5.88	0	+	1	337	0	1	610	0	No
TRINITY_DN29_c3_g1_i7	.	+	TRINITY_DN1564_c0_g1_i10	0	773	ID=TRINITY_DN1564_c0_g1_i10.p1;TRINITY_DN1564_c0_g1~~TRINITY_DN1564_c0_g1_i10.p1;ORF_type:3prime_partial_(-),score=23.15	0	-	2	686	0	1	773	0	No
TRINITY_DN29_c3_g1_i7	.	+	TRINITY_DN1564_c0_g1_i4	0	2083	ID=TRINITY_DN1564_c0_g1_i4.p1;TRINITY_DN1564_c0_g1~~TRINITY_DN1564_c0_g1_i4.p1;ORF_type:complete_(-),score=45.71	0	-	679	1996	0	1	2083	0	No
TRINITY_DN29_c3_g1_i7	.	+	TRINITY_DN1564_c0_g1_i9	0	773	ID=TRINITY_DN1564_c0_g1_i9.p1;TRINITY_DN1564_c0_g1~~TRINITY_DN1564_c0_g1_i9.p1;ORF_type:3prime_partial_(-),score=26.94	0	-	2	542	0	1	773	0	No
TRINITY_DN29_c3_g1_i7	.	+	TRINITY_DN1564_c0_g1_i2	0	2081	ID=TRINITY_DN1564_c0_g1_i2.p1;TRINITY_DN1564_c0_g1~~TRINITY_DN1564_c0_g1_i2.p1;ORF_type:complete_(-),score=31.18	0	-	679	1453	0	1	2081	0	No
TRINITY_DN29_c3_g1_i7	.	+	TRINITY_DN1564_c0_g1_i2	0	2081	ID=TRINITY_DN1564_c0_g1_i2.p4;TRINITY_DN1564_c0_g1~~TRINITY_DN1564_c0_g1_i2.p4;ORF_type:complete_(-),score=20.60	0	-	1528	1852	0	1	2081	0	No
TRINITY_DN29_c3_g1_i7	.	-	TRINITY_DN13894_c0_g1_i2	0	489	ID=TRINITY_DN13894_c0_g1_i2.p1;TRINITY_DN13894_c0_g1~~TRINITY_DN13894_c0_g1_i2.p1;ORF_type:3prime_partial_(+),score=25.52	0	+	181	487	0	1	489	0	No
TRINITY_DN29_c3_g1_i7	.	-	TRINITY_DN1522_c0_g1_i4	0	2110	ID=TRINITY_DN1522_c0_g1_i4.p1;TRINITY_DN1522_c0_g1~~TRINITY_DN1522_c0_g1_i4.p1;ORF_type:complete_(-),score=13.53	0	-	613	937	0	1	2110	0	No
TRINITY_DN29_c3_g1_i7	.	-	TRINITY_DN2826_c5_g3_i2	0	1913	ID=TRINITY_DN2826_c5_g3_i2.p1;TRINITY_DN2826_c5_g3~~TRINITY_DN2826_c5_g3_i2.p1;ORF_type:3prime_partial_(+),score=14.30	0	+	1395	1911	0	1	1913	0	No
TRINITY_DN29_c3_g1_i7	.	-	TRINITY_DN2826_c5_g3_i2	0	1913	ID=TRINITY_DN2826_c5_g3_i2.p3;TRINITY_DN2826_c5_g3~~TRINITY_DN2826_c5_g3_i2.p3;ORF_type:complete_(+),score=12.01	0	+	422	737	0	1	1913	0	No
TRINITY_DN29_c3_g1_i7	.	-	TRINITY_DN2826_c5_g3_i1	0	1549	ID=TRINITY_DN2826_c5_g3_i1.p2;TRINITY_DN2826_c5_g3~~TRINITY_DN2826_c5_g3_i1.p2;ORF_type:complete_(+),score=12.01	0	+	422	737	0	1	1549	0	No
TRINITY_DN29_c3_g1_i7	.	+	TRINITY_DN2026_c0_g3_i7	0	2957	ID=TRINITY_DN2026_c0_g3_i7.p1;TRINITY_DN2026_c0_g3~~TRINITY_DN2026_c0_g3_i7.p1;ORF_type:complete_(-),score=11.19	0	-	555	894	0	1	2957	0	No
TRINITY_DN29_c3_g1_i7	.	+	TRINITY_DN5153_c1_g1_i71	0	1416	ID=TRINITY_DN5153_c1_g1_i71.p1;TRINITY_DN5153_c1_g1~~TRINITY_DN5153_c1_g1_i71.p1;ORF_type:complete_(+),score=23.15	0	+	427	736	0	1	1416	0	No
TRINITY_DN29_c3_g1_i7	.	+	TRINITY_DN5153_c1_g1_i48	0	1020	ID=TRINITY_DN5153_c1_g1_i48.p1;TRINITY_DN5153_c1_g1~~TRINITY_DN5153_c1_g1_i48.p1;ORF_type:complete_(+),score=19.56	0	+	427	823	0	1	1020	0	No
TRINITY_DN29_c3_g1_i7	.	-	TRINITY_DN4269_c1_g1_i2	0	4949	ID=TRINITY_DN4269_c1_g1_i2.p5;TRINITY_DN4269_c1_g1~~TRINITY_DN4269_c1_g1_i2.p5;ORF_type:complete_(-),score=11.49	0	-	3834	4140	0	1	4949	0	No
TRINITY_DN29_c3_g1_i7	.	-	TRINITY_DN4269_c1_g1_i2	0	4949	ID=TRINITY_DN4269_c1_g1_i2.p2;TRINITY_DN4269_c1_g1~~TRINITY_DN4269_c1_g1_i2.p2;ORF_type:complete_(-),score=5.85	0	-	2867	3317	0	1	4949	0	No
TRINITY_DN29_c3_g1_i7	.	-	TRINITY_DN4269_c1_g1_i2	0	4949	ID=TRINITY_DN4269_c1_g1_i2.p3;TRINITY_DN4269_c1_g1~~TRINITY_DN4269_c1_g1_i2.p3;ORF_type:complete_(-),score=3.85	0	-	3405	3795	0	1	4949	0	No
TRINITY_DN29_c3_g1_i7	.	-	TRINITY_DN4269_c1_g1_i2	0	4949	ID=TRINITY_DN4269_c1_g1_i2.p1;TRINITY_DN4269_c1_g1~~TRINITY_DN4269_c1_g1_i2.p1;ORF_type:complete_(-),score=23.68	0	-	1619	2102	0	1	4949	0	No
TRINITY_DN29_c3_g1_i7	.	-	TRINITY_DN4877_c3_g3_i3	0	1476	ID=TRINITY_DN4877_c3_g3_i3.p1;TRINITY_DN4877_c3_g3~~TRINITY_DN4877_c3_g3_i3.p1;ORF_type:complete_(+),score=15.54	0	+	201	708	0	1	1476	0	No
TRINITY_DN29_c3_g1_i7	.	-	TRINITY_DN4877_c3_g3_i1	0	958	ID=TRINITY_DN4877_c3_g3_i1.p1;TRINITY_DN4877_c3_g3~~TRINITY_DN4877_c3_g3_i1.p1;ORF_type:complete_(+),score=19.70	0	+	201	612	0	1	958	0	No
TRINITY_DN29_c3_g1_i7	.	+	TRINITY_DN3952_c0_g2_i1	0	3802	ID=TRINITY_DN3952_c0_g2_i1.p1;TRINITY_DN3952_c0_g2~~TRINITY_DN3952_c0_g2_i1.p1;ORF_type:complete_(-),score=19.11	0	-	1211	1640	0	1	3802	0	No
TRINITY_DN29_c3_g1_i7	.	-	TRINITY_DN9833_c1_g1_i1	0	613	ID=TRINITY_DN9833_c1_g1_i1.p1;TRINITY_DN9833_c1_g1~~TRINITY_DN9833_c1_g1_i1.p1;ORF_type:complete_(+),score=25.93	0	+	175	592	0	1	613	0	No
TRINITY_DN29_c3_g1_i7	.	+	TRINITY_DN125127_c0_g1_i1	0	526	ID=TRINITY_DN125127_c0_g1_i1.p1;TRINITY_DN125127_c0_g1~~TRINITY_DN125127_c0_g1_i1.p1;ORF_type:5prime_partial_(+),score=11.93	0	+	1	349	0	1	526	0	No
TRINITY_DN29_c3_g1_i7	.	+	TRINITY_DN20184_c0_g1_i1	0	1719	ID=TRINITY_DN20184_c0_g1_i1.p1;TRINITY_DN20184_c0_g1~~TRINITY_DN20184_c0_g1_i1.p1;ORF_type:complete_(+),score=11.92	0	+	745	1060	0	1	1719	0	No
TRINITY_DN29_c3_g1_i7	.	-	TRINITY_DN32408_c0_g2_i1	0	887	ID=TRINITY_DN32408_c0_g2_i1.p1;TRINITY_DN32408_c0_g2~~TRINITY_DN32408_c0_g2_i1.p1;ORF_type:complete_(-),score=10.16	0	-	469	769	0	1	887	0	No
TRINITY_DN29_c3_g1_i7	.	+	TRINITY_DN38288_c0_g1_i1	0	521	ID=TRINITY_DN38288_c0_g1_i1.p1;TRINITY_DN38288_c0_g1~~TRINITY_DN38288_c0_g1_i1.p1;ORF_type:complete_(-),score=11.82	0	-	64	397	0	1	521	0	No
TRINITY_DN29_c3_g1_i7	.	+	TRINITY_DN15121_c0_g1_i1	0	998	ID=TRINITY_DN15121_c0_g1_i1.p1;TRINITY_DN15121_c0_g1~~TRINITY_DN15121_c0_g1_i1.p1;ORF_type:complete_(+),score=21.69	0	+	476	947	0	1	998	0	No
TRINITY_DN29_c3_g1_i7	.	-	TRINITY_DN9833_c1_g1_i3	0	526	ID=TRINITY_DN9833_c1_g1_i3.p1;TRINITY_DN9833_c1_g1~~TRINITY_DN9833_c1_g1_i3.p1;ORF_type:5prime_partial_(+),score=26.87	0	+	1	505	0	1	526	0	No
TRINITY_DN29_c3_g1_i7	.	-	TRINITY_DN840_c54_g1_i1	0	747	ID=TRINITY_DN840_c54_g1_i1.p1;TRINITY_DN840_c54_g1~~TRINITY_DN840_c54_g1_i1.p1;ORF_type:5prime_partial_(+),score=12.89	0	+	0	339	0	1	747	0	No
TRINITY_DN29_c3_g1_i8	.	-	TRINITY_DN13894_c0_g1_i4	0	610	ID=TRINITY_DN13894_c0_g1_i4.p1;TRINITY_DN13894_c0_g1~~TRINITY_DN13894_c0_g1_i4.p1;ORF_type:5prime_partial_(+),score=5.88	0	+	1	337	0	1	610	0	No
TRINITY_DN29_c3_g1_i8	.	+	TRINITY_DN1564_c0_g1_i10	0	773	ID=TRINITY_DN1564_c0_g1_i10.p1;TRINITY_DN1564_c0_g1~~TRINITY_DN1564_c0_g1_i10.p1;ORF_type:3prime_partial_(-),score=23.15	0	-	2	686	0	1	773	0	No
TRINITY_DN29_c3_g1_i8	.	+	TRINITY_DN1564_c0_g1_i4	0	2083	ID=TRINITY_DN1564_c0_g1_i4.p1;TRINITY_DN1564_c0_g1~~TRINITY_DN1564_c0_g1_i4.p1;ORF_type:complete_(-),score=45.71	0	-	679	1996	0	1	2083	0	No
TRINITY_DN29_c3_g1_i8	.	+	TRINITY_DN1564_c0_g1_i9	0	773	ID=TRINITY_DN1564_c0_g1_i9.p1;TRINITY_DN1564_c0_g1~~TRINITY_DN1564_c0_g1_i9.p1;ORF_type:3prime_partial_(-),score=26.94	0	-	2	542	0	1	773	0	No
TRINITY_DN29_c3_g1_i8	.	+	TRINITY_DN1564_c0_g1_i2	0	2081	ID=TRINITY_DN1564_c0_g1_i2.p1;TRINITY_DN1564_c0_g1~~TRINITY_DN1564_c0_g1_i2.p1;ORF_type:complete_(-),score=31.18	0	-	679	1453	0	1	2081	0	No
TRINITY_DN29_c3_g1_i8	.	+	TRINITY_DN1564_c0_g1_i2	0	2081	ID=TRINITY_DN1564_c0_g1_i2.p4;TRINITY_DN1564_c0_g1~~TRINITY_DN1564_c0_g1_i2.p4;ORF_type:complete_(-),score=20.60	0	-	1528	1852	0	1	2081	0	No
TRINITY_DN29_c3_g1_i8	.	-	TRINITY_DN1522_c0_g1_i4	0	2110	ID=TRINITY_DN1522_c0_g1_i4.p1;TRINITY_DN1522_c0_g1~~TRINITY_DN1522_c0_g1_i4.p1;ORF_type:complete_(-),score=13.53	0	-	613	937	0	1	2110	0	No
TRINITY_DN29_c3_g1_i8	.	-	TRINITY_DN13894_c0_g1_i2	0	489	ID=TRINITY_DN13894_c0_g1_i2.p1;TRINITY_DN13894_c0_g1~~TRINITY_DN13894_c0_g1_i2.p1;ORF_type:3prime_partial_(+),score=25.52	0	+	181	487	0	1	489	0	No
TRINITY_DN29_c3_g1_i8	.	-	TRINITY_DN2826_c5_g3_i2	0	1913	ID=TRINITY_DN2826_c5_g3_i2.p1;TRINITY_DN2826_c5_g3~~TRINITY_DN2826_c5_g3_i2.p1;ORF_type:3prime_partial_(+),score=14.30	0	+	1395	1911	0	1	1913	0	No
TRINITY_DN29_c3_g1_i8	.	-	TRINITY_DN2826_c5_g3_i2	0	1913	ID=TRINITY_DN2826_c5_g3_i2.p3;TRINITY_DN2826_c5_g3~~TRINITY_DN2826_c5_g3_i2.p3;ORF_type:complete_(+),score=12.01	0	+	422	737	0	1	1913	0	No
TRINITY_DN29_c3_g1_i8	.	-	TRINITY_DN2826_c5_g3_i1	0	1549	ID=TRINITY_DN2826_c5_g3_i1.p2;TRINITY_DN2826_c5_g3~~TRINITY_DN2826_c5_g3_i1.p2;ORF_type:complete_(+),score=12.01	0	+	422	737	0	1	1549	0	No
TRINITY_DN29_c3_g1_i8	.	+	TRINITY_DN2026_c0_g3_i7	0	2957	ID=TRINITY_DN2026_c0_g3_i7.p1;TRINITY_DN2026_c0_g3~~TRINITY_DN2026_c0_g3_i7.p1;ORF_type:complete_(-),score=11.19	0	-	555	894	0	1	2957	0	No
TRINITY_DN29_c3_g1_i8	.	-	TRINITY_DN102155_c0_g1_i1	0	977	ID=TRINITY_DN102155_c0_g1_i1.p2;TRINITY_DN102155_c0_g1~~TRINITY_DN102155_c0_g1_i1.p2;ORF_type:complete_(-),score=15.95	0	-	665	956	0	1	977	0	No
TRINITY_DN29_c3_g1_i8	.	-	TRINITY_DN102155_c0_g1_i1	0	977	ID=TRINITY_DN102155_c0_g1_i1.p1;TRINITY_DN102155_c0_g1~~TRINITY_DN102155_c0_g1_i1.p1;ORF_type:complete_(+),score=6.36	0	+	237	582	0	1	977	0	No
TRINITY_DN29_c3_g1_i8	.	-	TRINITY_DN68255_c0_g1_i1	0	1817	ID=TRINITY_DN68255_c0_g1_i1.p1;TRINITY_DN68255_c0_g1~~TRINITY_DN68255_c0_g1_i1.p1;ORF_type:5prime_partial_(-),score=3.54	0	-	1474	1816	0	1	1817	0	No
TRINITY_DN29_c3_g1_i8	.	+	TRINITY_DN5153_c1_g1_i71	0	1416	ID=TRINITY_DN5153_c1_g1_i71.p1;TRINITY_DN5153_c1_g1~~TRINITY_DN5153_c1_g1_i71.p1;ORF_type:complete_(+),score=23.15	0	+	427	736	0	1	1416	0	No
TRINITY_DN29_c3_g1_i8	.	+	TRINITY_DN5153_c1_g1_i48	0	1020	ID=TRINITY_DN5153_c1_g1_i48.p1;TRINITY_DN5153_c1_g1~~TRINITY_DN5153_c1_g1_i48.p1;ORF_type:complete_(+),score=19.56	0	+	427	823	0	1	1020	0	No
TRINITY_DN29_c3_g1_i8	.	+	TRINITY_DN125127_c0_g1_i1	0	526	ID=TRINITY_DN125127_c0_g1_i1.p1;TRINITY_DN125127_c0_g1~~TRINITY_DN125127_c0_g1_i1.p1;ORF_type:5prime_partial_(+),score=11.93	0	+	1	349	0	1	526	0	No
TRINITY_DN29_c3_g1_i8	.	-	TRINITY_DN4877_c3_g3_i3	0	1476	ID=TRINITY_DN4877_c3_g3_i3.p1;TRINITY_DN4877_c3_g3~~TRINITY_DN4877_c3_g3_i3.p1;ORF_type:complete_(+),score=15.54	0	+	201	708	0	1	1476	0	No
TRINITY_DN29_c3_g1_i8	.	-	TRINITY_DN4877_c3_g3_i1	0	958	ID=TRINITY_DN4877_c3_g3_i1.p1;TRINITY_DN4877_c3_g3~~TRINITY_DN4877_c3_g3_i1.p1;ORF_type:complete_(+),score=19.70	0	+	201	612	0	1	958	0	No
TRINITY_DN29_c3_g1_i8	.	-	TRINITY_DN9833_c1_g1_i1	0	613	ID=TRINITY_DN9833_c1_g1_i1.p1;TRINITY_DN9833_c1_g1~~TRINITY_DN9833_c1_g1_i1.p1;ORF_type:complete_(+),score=25.93	0	+	175	592	0	1	613	0	No
TRINITY_DN29_c3_g1_i8	.	+	TRINITY_DN20184_c0_g1_i1	0	1719	ID=TRINITY_DN20184_c0_g1_i1.p1;TRINITY_DN20184_c0_g1~~TRINITY_DN20184_c0_g1_i1.p1;ORF_type:complete_(+),score=11.92	0	+	745	1060	0	1	1719	0	No
TRINITY_DN29_c3_g1_i8	.	-	TRINITY_DN4269_c1_g1_i2	0	4949	ID=TRINITY_DN4269_c1_g1_i2.p5;TRINITY_DN4269_c1_g1~~TRINITY_DN4269_c1_g1_i2.p5;ORF_type:complete_(-),score=11.49	0	-	3834	4140	0	1	4949	0	No
TRINITY_DN29_c3_g1_i8	.	-	TRINITY_DN4269_c1_g1_i2	0	4949	ID=TRINITY_DN4269_c1_g1_i2.p2;TRINITY_DN4269_c1_g1~~TRINITY_DN4269_c1_g1_i2.p2;ORF_type:complete_(-),score=5.85	0	-	2867	3317	0	1	4949	0	No
TRINITY_DN29_c3_g1_i8	.	-	TRINITY_DN4269_c1_g1_i2	0	4949	ID=TRINITY_DN4269_c1_g1_i2.p3;TRINITY_DN4269_c1_g1~~TRINITY_DN4269_c1_g1_i2.p3;ORF_type:complete_(-),score=3.85	0	-	3405	3795	0	1	4949	0	No
TRINITY_DN29_c3_g1_i8	.	-	TRINITY_DN4269_c1_g1_i2	0	4949	ID=TRINITY_DN4269_c1_g1_i2.p1;TRINITY_DN4269_c1_g1~~TRINITY_DN4269_c1_g1_i2.p1;ORF_type:complete_(-),score=23.68	0	-	1619	2102	0	1	4949	0	No
TRINITY_DN29_c3_g1_i8	.	-	TRINITY_DN32408_c0_g2_i1	0	887	ID=TRINITY_DN32408_c0_g2_i1.p1;TRINITY_DN32408_c0_g2~~TRINITY_DN32408_c0_g2_i1.p1;ORF_type:complete_(-),score=10.16	0	-	469	769	0	1	887	0	No
TRINITY_DN29_c3_g1_i8	.	+	TRINITY_DN15121_c0_g1_i1	0	998	ID=TRINITY_DN15121_c0_g1_i1.p1;TRINITY_DN15121_c0_g1~~TRINITY_DN15121_c0_g1_i1.p1;ORF_type:complete_(+),score=21.69	0	+	476	947	0	1	998	0	No
TRINITY_DN29_c3_g1_i8	.	+	TRINITY_DN38288_c0_g1_i1	0	521	ID=TRINITY_DN38288_c0_g1_i1.p1;TRINITY_DN38288_c0_g1~~TRINITY_DN38288_c0_g1_i1.p1;ORF_type:complete_(-),score=11.82	0	-	64	397	0	1	521	0	No
TRINITY_DN29_c3_g1_i8	.	-	TRINITY_DN9833_c1_g1_i3	0	526	ID=TRINITY_DN9833_c1_g1_i3.p1;TRINITY_DN9833_c1_g1~~TRINITY_DN9833_c1_g1_i3.p1;ORF_type:5prime_partial_(+),score=26.87	0	+	1	505	0	1	526	0	No
TRINITY_DN29_c3_g1_i8	.	-	TRINITY_DN840_c54_g1_i1	0	747	ID=TRINITY_DN840_c54_g1_i1.p1;TRINITY_DN840_c54_g1~~TRINITY_DN840_c54_g1_i1.p1;ORF_type:5prime_partial_(+),score=12.89	0	+	0	339	0	1	747	0	No
TRINITY_DN29_c4_g1_i1	.	-	TRINITY_DN5919_c0_g1_i7	0	1905	ID=TRINITY_DN5919_c0_g1_i7.p1;TRINITY_DN5919_c0_g1~~TRINITY_DN5919_c0_g1_i7.p1;ORF_type:complete_(-),score=9.52	0	-	145	823	0	1	1905	0	No
TRINITY_DN29_c4_g1_i1	.	-	TRINITY_DN5919_c0_g1_i7	0	1905	ID=TRINITY_DN5919_c0_g1_i7.p2;TRINITY_DN5919_c0_g1~~TRINITY_DN5919_c0_g1_i7.p2;ORF_type:complete_(-),score=12.76	0	-	819	1416	0	1	1905	0	No
TRINITY_DN29_c4_g1_i1	.	-	TRINITY_DN5919_c0_g1_i5	0	1915	ID=TRINITY_DN5919_c0_g1_i5.p1;TRINITY_DN5919_c0_g1~~TRINITY_DN5919_c0_g1_i5.p1;ORF_type:complete_(-),score=15.11	0	-	838	1426	0	1	1915	0	No
TRINITY_DN29_c4_g1_i1	.	-	TRINITY_DN5919_c0_g1_i3	0	1859	ID=TRINITY_DN5919_c0_g1_i3.p1;TRINITY_DN5919_c0_g1~~TRINITY_DN5919_c0_g1_i3.p1;ORF_type:complete_(-),score=13.80	0	-	838	1330	0	1	1859	0	No
TRINITY_DN29_c4_g1_i1	.	-	TRINITY_DN16651_c0_g1_i8	0	4177	ID=TRINITY_DN16651_c0_g1_i8.p1;TRINITY_DN16651_c0_g1~~TRINITY_DN16651_c0_g1_i8.p1;ORF_type:complete_(+),score=26.29	0	+	304	790	0	1	4177	0	No
TRINITY_DN29_c4_g1_i1	.	-	TRINITY_DN17123_c0_g1_i2	0	1543	ID=TRINITY_DN17123_c0_g1_i2.p1;TRINITY_DN17123_c0_g1~~TRINITY_DN17123_c0_g1_i2.p1;ORF_type:5prime_partial_(+),score=5.75	0	+	2	536	0	1	1543	0	No
TRINITY_DN29_c4_g1_i1	.	-	TRINITY_DN17123_c0_g1_i2	0	1543	ID=TRINITY_DN17123_c0_g1_i2.p2;TRINITY_DN17123_c0_g1~~TRINITY_DN17123_c0_g1_i2.p2;ORF_type:complete_(+),score=22.52	0	+	835	1222	0	1	1543	0	No
TRINITY_DN29_c4_g1_i1	.	-	TRINITY_DN8653_c6_g1_i1	0	497	ID=TRINITY_DN8653_c6_g1_i1.p1;TRINITY_DN8653_c6_g1~~TRINITY_DN8653_c6_g1_i1.p1;ORF_type:5prime_partial_(-),score=1.75	0	-	43	496	0	1	497	0	No
TRINITY_DN29_c4_g1_i1	.	+	TRINITY_DN13016_c0_g1_i11	0	1522	ID=TRINITY_DN13016_c0_g1_i11.p1;TRINITY_DN13016_c0_g1~~TRINITY_DN13016_c0_g1_i11.p1;ORF_type:complete_(+),score=11.17	0	+	679	1168	0	1	1522	0	No
TRINITY_DN29_c4_g1_i10	.	-	TRINITY_DN5919_c0_g1_i7	0	1905	ID=TRINITY_DN5919_c0_g1_i7.p1;TRINITY_DN5919_c0_g1~~TRINITY_DN5919_c0_g1_i7.p1;ORF_type:complete_(-),score=9.52	0	-	145	823	0	1	1905	0	No
TRINITY_DN29_c4_g1_i10	.	-	TRINITY_DN5919_c0_g1_i7	0	1905	ID=TRINITY_DN5919_c0_g1_i7.p2;TRINITY_DN5919_c0_g1~~TRINITY_DN5919_c0_g1_i7.p2;ORF_type:complete_(-),score=12.76	0	-	819	1416	0	1	1905	0	No
TRINITY_DN29_c4_g1_i10	.	-	TRINITY_DN5919_c0_g1_i5	0	1915	ID=TRINITY_DN5919_c0_g1_i5.p1;TRINITY_DN5919_c0_g1~~TRINITY_DN5919_c0_g1_i5.p1;ORF_type:complete_(-),score=15.11	0	-	838	1426	0	1	1915	0	No
TRINITY_DN29_c4_g1_i10	.	-	TRINITY_DN5919_c0_g1_i3	0	1859	ID=TRINITY_DN5919_c0_g1_i3.p1;TRINITY_DN5919_c0_g1~~TRINITY_DN5919_c0_g1_i3.p1;ORF_type:complete_(-),score=13.80	0	-	838	1330	0	1	1859	0	No
TRINITY_DN29_c4_g1_i10	.	-	TRINITY_DN8653_c6_g1_i1	0	497	ID=TRINITY_DN8653_c6_g1_i1.p1;TRINITY_DN8653_c6_g1~~TRINITY_DN8653_c6_g1_i1.p1;ORF_type:5prime_partial_(-),score=1.75	0	-	43	496	0	1	497	0	No
TRINITY_DN29_c4_g1_i10	.	+	TRINITY_DN13016_c0_g1_i11	0	1522	ID=TRINITY_DN13016_c0_g1_i11.p1;TRINITY_DN13016_c0_g1~~TRINITY_DN13016_c0_g1_i11.p1;ORF_type:complete_(+),score=11.17	0	+	679	1168	0	1	1522	0	No
TRINITY_DN29_c4_g1_i3	.	-	TRINITY_DN8653_c6_g1_i1	0	497	ID=TRINITY_DN8653_c6_g1_i1.p1;TRINITY_DN8653_c6_g1~~TRINITY_DN8653_c6_g1_i1.p1;ORF_type:5prime_partial_(-),score=1.75	0	-	43	496	0	1	497	0	No
TRINITY_DN29_c4_g1_i3	.	-	TRINITY_DN5919_c0_g1_i7	0	1905	ID=TRINITY_DN5919_c0_g1_i7.p1;TRINITY_DN5919_c0_g1~~TRINITY_DN5919_c0_g1_i7.p1;ORF_type:complete_(-),score=9.52	0	-	145	823	0	1	1905	0	No
TRINITY_DN29_c4_g1_i3	.	-	TRINITY_DN5919_c0_g1_i7	0	1905	ID=TRINITY_DN5919_c0_g1_i7.p2;TRINITY_DN5919_c0_g1~~TRINITY_DN5919_c0_g1_i7.p2;ORF_type:complete_(-),score=12.76	0	-	819	1416	0	1	1905	0	No
TRINITY_DN29_c4_g1_i3	.	-	TRINITY_DN5919_c0_g1_i5	0	1915	ID=TRINITY_DN5919_c0_g1_i5.p1;TRINITY_DN5919_c0_g1~~TRINITY_DN5919_c0_g1_i5.p1;ORF_type:complete_(-),score=15.11	0	-	838	1426	0	1	1915	0	No
TRINITY_DN29_c4_g1_i3	.	-	TRINITY_DN5919_c0_g1_i3	0	1859	ID=TRINITY_DN5919_c0_g1_i3.p1;TRINITY_DN5919_c0_g1~~TRINITY_DN5919_c0_g1_i3.p1;ORF_type:complete_(-),score=13.80	0	-	838	1330	0	1	1859	0	No
TRINITY_DN29_c4_g1_i3	.	+	TRINITY_DN13016_c0_g1_i11	0	1522	ID=TRINITY_DN13016_c0_g1_i11.p1;TRINITY_DN13016_c0_g1~~TRINITY_DN13016_c0_g1_i11.p1;ORF_type:complete_(+),score=11.17	0	+	679	1168	0	1	1522	0	No
TRINITY_DN29_c4_g1_i4	.	-	TRINITY_DN5919_c0_g1_i7	0	1905	ID=TRINITY_DN5919_c0_g1_i7.p1;TRINITY_DN5919_c0_g1~~TRINITY_DN5919_c0_g1_i7.p1;ORF_type:complete_(-),score=9.52	0	-	145	823	0	1	1905	0	No
TRINITY_DN29_c4_g1_i4	.	-	TRINITY_DN5919_c0_g1_i7	0	1905	ID=TRINITY_DN5919_c0_g1_i7.p2;TRINITY_DN5919_c0_g1~~TRINITY_DN5919_c0_g1_i7.p2;ORF_type:complete_(-),score=12.76	0	-	819	1416	0	1	1905	0	No
TRINITY_DN29_c4_g1_i4	.	-	TRINITY_DN5919_c0_g1_i5	0	1915	ID=TRINITY_DN5919_c0_g1_i5.p1;TRINITY_DN5919_c0_g1~~TRINITY_DN5919_c0_g1_i5.p1;ORF_type:complete_(-),score=15.11	0	-	838	1426	0	1	1915	0	No
TRINITY_DN29_c4_g1_i4	.	-	TRINITY_DN5919_c0_g1_i3	0	1859	ID=TRINITY_DN5919_c0_g1_i3.p1;TRINITY_DN5919_c0_g1~~TRINITY_DN5919_c0_g1_i3.p1;ORF_type:complete_(-),score=13.80	0	-	838	1330	0	1	1859	0	No
TRINITY_DN29_c4_g1_i4	.	-	TRINITY_DN17123_c0_g1_i2	0	1543	ID=TRINITY_DN17123_c0_g1_i2.p1;TRINITY_DN17123_c0_g1~~TRINITY_DN17123_c0_g1_i2.p1;ORF_type:5prime_partial_(+),score=5.75	0	+	2	536	0	1	1543	0	No
TRINITY_DN29_c4_g1_i4	.	-	TRINITY_DN17123_c0_g1_i2	0	1543	ID=TRINITY_DN17123_c0_g1_i2.p2;TRINITY_DN17123_c0_g1~~TRINITY_DN17123_c0_g1_i2.p2;ORF_type:complete_(+),score=22.52	0	+	835	1222	0	1	1543	0	No
TRINITY_DN29_c4_g1_i4	.	-	TRINITY_DN16651_c0_g1_i8	0	4177	ID=TRINITY_DN16651_c0_g1_i8.p1;TRINITY_DN16651_c0_g1~~TRINITY_DN16651_c0_g1_i8.p1;ORF_type:complete_(+),score=26.29	0	+	304	790	0	1	4177	0	No
TRINITY_DN29_c4_g1_i4	.	-	TRINITY_DN8653_c6_g1_i1	0	497	ID=TRINITY_DN8653_c6_g1_i1.p1;TRINITY_DN8653_c6_g1~~TRINITY_DN8653_c6_g1_i1.p1;ORF_type:5prime_partial_(-),score=1.75	0	-	43	496	0	1	497	0	No
TRINITY_DN29_c4_g1_i4	.	+	TRINITY_DN13016_c0_g1_i11	0	1522	ID=TRINITY_DN13016_c0_g1_i11.p1;TRINITY_DN13016_c0_g1~~TRINITY_DN13016_c0_g1_i11.p1;ORF_type:complete_(+),score=11.17	0	+	679	1168	0	1	1522	0	No
TRINITY_DN29_c4_g1_i5	.	-	TRINITY_DN5919_c0_g1_i7	0	1905	ID=TRINITY_DN5919_c0_g1_i7.p1;TRINITY_DN5919_c0_g1~~TRINITY_DN5919_c0_g1_i7.p1;ORF_type:complete_(-),score=9.52	0	-	145	823	0	1	1905	0	No
TRINITY_DN29_c4_g1_i5	.	-	TRINITY_DN5919_c0_g1_i7	0	1905	ID=TRINITY_DN5919_c0_g1_i7.p2;TRINITY_DN5919_c0_g1~~TRINITY_DN5919_c0_g1_i7.p2;ORF_type:complete_(-),score=12.76	0	-	819	1416	0	1	1905	0	No
TRINITY_DN29_c4_g1_i5	.	-	TRINITY_DN5919_c0_g1_i5	0	1915	ID=TRINITY_DN5919_c0_g1_i5.p1;TRINITY_DN5919_c0_g1~~TRINITY_DN5919_c0_g1_i5.p1;ORF_type:complete_(-),score=15.11	0	-	838	1426	0	1	1915	0	No
TRINITY_DN29_c4_g1_i5	.	-	TRINITY_DN5919_c0_g1_i3	0	1859	ID=TRINITY_DN5919_c0_g1_i3.p1;TRINITY_DN5919_c0_g1~~TRINITY_DN5919_c0_g1_i3.p1;ORF_type:complete_(-),score=13.80	0	-	838	1330	0	1	1859	0	No
TRINITY_DN29_c4_g1_i5	.	-	TRINITY_DN16651_c0_g1_i8	0	4177	ID=TRINITY_DN16651_c0_g1_i8.p1;TRINITY_DN16651_c0_g1~~TRINITY_DN16651_c0_g1_i8.p1;ORF_type:complete_(+),score=26.29	0	+	304	790	0	1	4177	0	No
TRINITY_DN29_c4_g1_i5	.	-	TRINITY_DN17123_c0_g1_i2	0	1543	ID=TRINITY_DN17123_c0_g1_i2.p1;TRINITY_DN17123_c0_g1~~TRINITY_DN17123_c0_g1_i2.p1;ORF_type:5prime_partial_(+),score=5.75	0	+	2	536	0	1	1543	0	No
TRINITY_DN29_c4_g1_i5	.	-	TRINITY_DN17123_c0_g1_i2	0	1543	ID=TRINITY_DN17123_c0_g1_i2.p2;TRINITY_DN17123_c0_g1~~TRINITY_DN17123_c0_g1_i2.p2;ORF_type:complete_(+),score=22.52	0	+	835	1222	0	1	1543	0	No
TRINITY_DN29_c4_g1_i5	.	-	TRINITY_DN8653_c6_g1_i1	0	497	ID=TRINITY_DN8653_c6_g1_i1.p1;TRINITY_DN8653_c6_g1~~TRINITY_DN8653_c6_g1_i1.p1;ORF_type:5prime_partial_(-),score=1.75	0	-	43	496	0	1	497	0	No
TRINITY_DN29_c4_g1_i5	.	+	TRINITY_DN13016_c0_g1_i11	0	1522	ID=TRINITY_DN13016_c0_g1_i11.p1;TRINITY_DN13016_c0_g1~~TRINITY_DN13016_c0_g1_i11.p1;ORF_type:complete_(+),score=11.17	0	+	679	1168	0	1	1522	0	No
TRINITY_DN29_c4_g1_i6	.	-	TRINITY_DN21046_c0_g1_i1	0	1091	ID=TRINITY_DN21046_c0_g1_i1.p1;TRINITY_DN21046_c0_g1~~TRINITY_DN21046_c0_g1_i1.p1;ORF_type:complete_(-),score=0.34	0	-	184	490	0	1	1091	0	No
TRINITY_DN29_c4_g1_i6	.	-	TRINITY_DN5919_c0_g1_i7	0	1905	ID=TRINITY_DN5919_c0_g1_i7.p1;TRINITY_DN5919_c0_g1~~TRINITY_DN5919_c0_g1_i7.p1;ORF_type:complete_(-),score=9.52	0	-	145	823	0	1	1905	0	No
TRINITY_DN29_c4_g1_i6	.	-	TRINITY_DN5919_c0_g1_i7	0	1905	ID=TRINITY_DN5919_c0_g1_i7.p2;TRINITY_DN5919_c0_g1~~TRINITY_DN5919_c0_g1_i7.p2;ORF_type:complete_(-),score=12.76	0	-	819	1416	0	1	1905	0	No
TRINITY_DN29_c4_g1_i6	.	-	TRINITY_DN5919_c0_g1_i5	0	1915	ID=TRINITY_DN5919_c0_g1_i5.p1;TRINITY_DN5919_c0_g1~~TRINITY_DN5919_c0_g1_i5.p1;ORF_type:complete_(-),score=15.11	0	-	838	1426	0	1	1915	0	No
TRINITY_DN29_c4_g1_i6	.	-	TRINITY_DN5919_c0_g1_i3	0	1859	ID=TRINITY_DN5919_c0_g1_i3.p1;TRINITY_DN5919_c0_g1~~TRINITY_DN5919_c0_g1_i3.p1;ORF_type:complete_(-),score=13.80	0	-	838	1330	0	1	1859	0	No
TRINITY_DN29_c4_g1_i6	.	-	TRINITY_DN16651_c0_g1_i8	0	4177	ID=TRINITY_DN16651_c0_g1_i8.p1;TRINITY_DN16651_c0_g1~~TRINITY_DN16651_c0_g1_i8.p1;ORF_type:complete_(+),score=26.29	0	+	304	790	0	1	4177	0	No
TRINITY_DN29_c4_g1_i6	.	-	TRINITY_DN17123_c0_g1_i2	0	1543	ID=TRINITY_DN17123_c0_g1_i2.p1;TRINITY_DN17123_c0_g1~~TRINITY_DN17123_c0_g1_i2.p1;ORF_type:5prime_partial_(+),score=5.75	0	+	2	536	0	1	1543	0	No
TRINITY_DN29_c4_g1_i6	.	-	TRINITY_DN17123_c0_g1_i2	0	1543	ID=TRINITY_DN17123_c0_g1_i2.p2;TRINITY_DN17123_c0_g1~~TRINITY_DN17123_c0_g1_i2.p2;ORF_type:complete_(+),score=22.52	0	+	835	1222	0	1	1543	0	No
TRINITY_DN29_c4_g1_i6	.	-	TRINITY_DN8653_c6_g1_i1	0	497	ID=TRINITY_DN8653_c6_g1_i1.p1;TRINITY_DN8653_c6_g1~~TRINITY_DN8653_c6_g1_i1.p1;ORF_type:5prime_partial_(-),score=1.75	0	-	43	496	0	1	497	0	No
TRINITY_DN29_c4_g1_i6	.	+	TRINITY_DN13016_c0_g1_i11	0	1522	ID=TRINITY_DN13016_c0_g1_i11.p1;TRINITY_DN13016_c0_g1~~TRINITY_DN13016_c0_g1_i11.p1;ORF_type:complete_(+),score=11.17	0	+	679	1168	0	1	1522	0	No
TRINITY_DN29_c4_g1_i7	.	-	TRINITY_DN21046_c0_g1_i1	0	1091	ID=TRINITY_DN21046_c0_g1_i1.p1;TRINITY_DN21046_c0_g1~~TRINITY_DN21046_c0_g1_i1.p1;ORF_type:complete_(-),score=0.34	0	-	184	490	0	1	1091	0	No
TRINITY_DN29_c4_g1_i7	.	-	TRINITY_DN5919_c0_g1_i7	0	1905	ID=TRINITY_DN5919_c0_g1_i7.p1;TRINITY_DN5919_c0_g1~~TRINITY_DN5919_c0_g1_i7.p1;ORF_type:complete_(-),score=9.52	0	-	145	823	0	1	1905	0	No
TRINITY_DN29_c4_g1_i7	.	-	TRINITY_DN5919_c0_g1_i7	0	1905	ID=TRINITY_DN5919_c0_g1_i7.p2;TRINITY_DN5919_c0_g1~~TRINITY_DN5919_c0_g1_i7.p2;ORF_type:complete_(-),score=12.76	0	-	819	1416	0	1	1905	0	No
TRINITY_DN29_c4_g1_i7	.	-	TRINITY_DN5919_c0_g1_i5	0	1915	ID=TRINITY_DN5919_c0_g1_i5.p1;TRINITY_DN5919_c0_g1~~TRINITY_DN5919_c0_g1_i5.p1;ORF_type:complete_(-),score=15.11	0	-	838	1426	0	1	1915	0	No
TRINITY_DN29_c4_g1_i7	.	-	TRINITY_DN5919_c0_g1_i3	0	1859	ID=TRINITY_DN5919_c0_g1_i3.p1;TRINITY_DN5919_c0_g1~~TRINITY_DN5919_c0_g1_i3.p1;ORF_type:complete_(-),score=13.80	0	-	838	1330	0	1	1859	0	No
TRINITY_DN29_c4_g1_i7	.	-	TRINITY_DN17123_c0_g1_i2	0	1543	ID=TRINITY_DN17123_c0_g1_i2.p1;TRINITY_DN17123_c0_g1~~TRINITY_DN17123_c0_g1_i2.p1;ORF_type:5prime_partial_(+),score=5.75	0	+	2	536	0	1	1543	0	No
TRINITY_DN29_c4_g1_i7	.	-	TRINITY_DN17123_c0_g1_i2	0	1543	ID=TRINITY_DN17123_c0_g1_i2.p2;TRINITY_DN17123_c0_g1~~TRINITY_DN17123_c0_g1_i2.p2;ORF_type:complete_(+),score=22.52	0	+	835	1222	0	1	1543	0	No
TRINITY_DN29_c4_g1_i7	.	-	TRINITY_DN8653_c6_g1_i1	0	497	ID=TRINITY_DN8653_c6_g1_i1.p1;TRINITY_DN8653_c6_g1~~TRINITY_DN8653_c6_g1_i1.p1;ORF_type:5prime_partial_(-),score=1.75	0	-	43	496	0	1	497	0	No
TRINITY_DN29_c4_g1_i7	.	+	TRINITY_DN13016_c0_g1_i11	0	1522	ID=TRINITY_DN13016_c0_g1_i11.p1;TRINITY_DN13016_c0_g1~~TRINITY_DN13016_c0_g1_i11.p1;ORF_type:complete_(+),score=11.17	0	+	679	1168	0	1	1522	0	No
TRINITY_DN29_c4_g1_i8	.	-	TRINITY_DN5919_c0_g1_i7	0	1905	ID=TRINITY_DN5919_c0_g1_i7.p1;TRINITY_DN5919_c0_g1~~TRINITY_DN5919_c0_g1_i7.p1;ORF_type:complete_(-),score=9.52	0	-	145	823	0	1	1905	0	No
TRINITY_DN29_c4_g1_i8	.	-	TRINITY_DN5919_c0_g1_i7	0	1905	ID=TRINITY_DN5919_c0_g1_i7.p2;TRINITY_DN5919_c0_g1~~TRINITY_DN5919_c0_g1_i7.p2;ORF_type:complete_(-),score=12.76	0	-	819	1416	0	1	1905	0	No
TRINITY_DN29_c4_g1_i8	.	-	TRINITY_DN5919_c0_g1_i5	0	1915	ID=TRINITY_DN5919_c0_g1_i5.p1;TRINITY_DN5919_c0_g1~~TRINITY_DN5919_c0_g1_i5.p1;ORF_type:complete_(-),score=15.11	0	-	838	1426	0	1	1915	0	No
TRINITY_DN29_c4_g1_i8	.	-	TRINITY_DN5919_c0_g1_i3	0	1859	ID=TRINITY_DN5919_c0_g1_i3.p1;TRINITY_DN5919_c0_g1~~TRINITY_DN5919_c0_g1_i3.p1;ORF_type:complete_(-),score=13.80	0	-	838	1330	0	1	1859	0	No
TRINITY_DN29_c4_g1_i8	.	-	TRINITY_DN17123_c0_g1_i2	0	1543	ID=TRINITY_DN17123_c0_g1_i2.p1;TRINITY_DN17123_c0_g1~~TRINITY_DN17123_c0_g1_i2.p1;ORF_type:5prime_partial_(+),score=5.75	0	+	2	536	0	1	1543	0	No
TRINITY_DN29_c4_g1_i8	.	-	TRINITY_DN17123_c0_g1_i2	0	1543	ID=TRINITY_DN17123_c0_g1_i2.p2;TRINITY_DN17123_c0_g1~~TRINITY_DN17123_c0_g1_i2.p2;ORF_type:complete_(+),score=22.52	0	+	835	1222	0	1	1543	0	No
TRINITY_DN29_c4_g1_i8	.	-	TRINITY_DN16651_c0_g1_i8	0	4177	ID=TRINITY_DN16651_c0_g1_i8.p1;TRINITY_DN16651_c0_g1~~TRINITY_DN16651_c0_g1_i8.p1;ORF_type:complete_(+),score=26.29	0	+	304	790	0	1	4177	0	No
TRINITY_DN29_c4_g1_i8	.	-	TRINITY_DN8653_c6_g1_i1	0	497	ID=TRINITY_DN8653_c6_g1_i1.p1;TRINITY_DN8653_c6_g1~~TRINITY_DN8653_c6_g1_i1.p1;ORF_type:5prime_partial_(-),score=1.75	0	-	43	496	0	1	497	0	No
TRINITY_DN29_c4_g1_i8	.	+	TRINITY_DN13016_c0_g1_i11	0	1522	ID=TRINITY_DN13016_c0_g1_i11.p1;TRINITY_DN13016_c0_g1~~TRINITY_DN13016_c0_g1_i11.p1;ORF_type:complete_(+),score=11.17	0	+	679	1168	0	1	1522	0	No
TRINITY_DN29_c7_g1_i15	.	+	TRINITY_DN29_c7_g1_i4	0	2447	ID=TRINITY_DN29_c7_g1_i4.p1;TRINITY_DN29_c7_g1~~TRINITY_DN29_c7_g1_i4.p1;ORF_type:3prime_partial_(+),score=4.88	0	+	2072	2447	0	1	2447	0	No
TRINITY_DN29_c7_g1_i15	.	+	TRINITY_DN29_c7_g1_i14	0	1887	ID=TRINITY_DN29_c7_g1_i14.p1;TRINITY_DN29_c7_g1~~TRINITY_DN29_c7_g1_i14.p1;ORF_type:3prime_partial_(+),score=6.13	0	+	1526	1886	0	1	1887	0	No
TRINITY_DN29_c8_g1_i1	.	-	TRINITY_DN8255_c0_g1_i14	0	391	ID=TRINITY_DN8255_c0_g1_i14.p1;TRINITY_DN8255_c0_g1~~TRINITY_DN8255_c0_g1_i14.p1;ORF_type:3prime_partial_(+),score=3.86	0	+	91	391	0	1	391	0	No
TRINITY_DN29_c9_g1_i10	.	+	TRINITY_DN29_c9_g1_i8	0	456	ID=TRINITY_DN29_c9_g1_i8.p1;TRINITY_DN29_c9_g1~~TRINITY_DN29_c9_g1_i8.p1;ORF_type:5prime_partial_(+),score=15.72	0	+	0	387	0	1	456	0	No
TRINITY_DN29_c9_g1_i10	.	+	TRINITY_DN29_c9_g1_i16	0	517	ID=TRINITY_DN29_c9_g1_i16.p1;TRINITY_DN29_c9_g1~~TRINITY_DN29_c9_g1_i16.p1;ORF_type:5prime_partial_(+),score=16.04	0	+	0	387	0	1	517	0	No
TRINITY_DN29_c9_g1_i10	.	-	TRINITY_DN3001_c0_g1_i19	0	481	ID=TRINITY_DN3001_c0_g1_i19.p1;TRINITY_DN3001_c0_g1~~TRINITY_DN3001_c0_g1_i19.p1;ORF_type:5prime_partial_(-),score=13.98	0	-	98	479	0	1	481	0	No
TRINITY_DN29_c9_g1_i10	.	-	TRINITY_DN3001_c0_g1_i5	0	574	ID=TRINITY_DN3001_c0_g1_i5.p1;TRINITY_DN3001_c0_g1~~TRINITY_DN3001_c0_g1_i5.p1;ORF_type:5prime_partial_(-),score=13.98	0	-	191	572	0	1	574	0	No
TRINITY_DN29_c9_g1_i10	.	-	TRINITY_DN3001_c0_g1_i11	0	499	ID=TRINITY_DN3001_c0_g1_i11.p1;TRINITY_DN3001_c0_g1~~TRINITY_DN3001_c0_g1_i11.p1;ORF_type:5prime_partial_(-),score=16.62	0	-	116	497	0	1	499	0	No
TRINITY_DN29_c9_g1_i10	.	-	TRINITY_DN3001_c0_g1_i1	0	666	ID=TRINITY_DN3001_c0_g1_i1.p1;TRINITY_DN3001_c0_g1~~TRINITY_DN3001_c0_g1_i1.p1;ORF_type:5prime_partial_(-),score=17.60	0	-	136	664	0	1	666	0	No
TRINITY_DN29_c9_g1_i10	.	-	TRINITY_DN3001_c0_g1_i13	0	305	ID=TRINITY_DN3001_c0_g1_i13.p1;TRINITY_DN3001_c0_g1~~TRINITY_DN3001_c0_g1_i13.p1;ORF_type:internal_(-),score=12.10	0	-	1	304	0	1	305	0	No
TRINITY_DN29_c9_g1_i10	.	+	TRINITY_DN5620_c0_g2_i2	0	719	ID=TRINITY_DN5620_c0_g2_i2.p1;TRINITY_DN5620_c0_g2~~TRINITY_DN5620_c0_g2_i2.p1;ORF_type:internal_(+),score=23.11	0	+	1	718	0	1	719	0	No
TRINITY_DN29_c9_g1_i10	.	+	TRINITY_DN5620_c0_g1_i8	0	505	ID=TRINITY_DN5620_c0_g1_i8.p1;TRINITY_DN5620_c0_g1~~TRINITY_DN5620_c0_g1_i8.p1;ORF_type:5prime_partial_(+),score=1.73	0	+	1	319	0	1	505	0	No
TRINITY_DN29_c9_g1_i10	.	+	TRINITY_DN5620_c0_g1_i7	0	505	ID=TRINITY_DN5620_c0_g1_i7.p1;TRINITY_DN5620_c0_g1~~TRINITY_DN5620_c0_g1_i7.p1;ORF_type:5prime_partial_(+),score=3.78	0	+	1	319	0	1	505	0	No
TRINITY_DN29_c9_g1_i10	.	+	TRINITY_DN5620_c0_g1_i4	0	755	ID=TRINITY_DN5620_c0_g1_i4.p1;TRINITY_DN5620_c0_g1~~TRINITY_DN5620_c0_g1_i4.p1;ORF_type:complete_(+),score=6.73	0	+	68	569	0	1	755	0	No
TRINITY_DN29_c9_g1_i10	.	+	TRINITY_DN29_c9_g1_i13	0	343	ID=TRINITY_DN29_c9_g1_i13.p1;TRINITY_DN29_c9_g1~~TRINITY_DN29_c9_g1_i13.p1;ORF_type:internal_(+),score=14.09	0	+	0	342	0	1	343	0	No
TRINITY_DN29_c9_g1_i10	.	+	TRINITY_DN3243_c4_g1_i1	0	356	ID=TRINITY_DN3243_c4_g1_i1.p1;TRINITY_DN3243_c4_g1~~TRINITY_DN3243_c4_g1_i1.p1;ORF_type:5prime_partial_(+),score=14.00	0	+	2	356	0	1	356	0	No
TRINITY_DN29_c9_g1_i11	.	+	TRINITY_DN29_c9_g1_i8	0	456	ID=TRINITY_DN29_c9_g1_i8.p1;TRINITY_DN29_c9_g1~~TRINITY_DN29_c9_g1_i8.p1;ORF_type:5prime_partial_(+),score=15.72	0	+	0	387	0	1	456	0	No
TRINITY_DN29_c9_g1_i11	.	+	TRINITY_DN29_c9_g1_i16	0	517	ID=TRINITY_DN29_c9_g1_i16.p1;TRINITY_DN29_c9_g1~~TRINITY_DN29_c9_g1_i16.p1;ORF_type:5prime_partial_(+),score=16.04	0	+	0	387	0	1	517	0	No
TRINITY_DN29_c9_g1_i11	.	+	TRINITY_DN29_c9_g1_i13	0	343	ID=TRINITY_DN29_c9_g1_i13.p1;TRINITY_DN29_c9_g1~~TRINITY_DN29_c9_g1_i13.p1;ORF_type:internal_(+),score=14.09	0	+	0	342	0	1	343	0	No
TRINITY_DN29_c9_g1_i11	.	+	TRINITY_DN5620_c0_g2_i2	0	719	ID=TRINITY_DN5620_c0_g2_i2.p1;TRINITY_DN5620_c0_g2~~TRINITY_DN5620_c0_g2_i2.p1;ORF_type:internal_(+),score=23.11	0	+	1	718	0	1	719	0	No
TRINITY_DN29_c9_g1_i11	.	+	TRINITY_DN1803_c0_g1_i7	0	1856	ID=TRINITY_DN1803_c0_g1_i7.p1;TRINITY_DN1803_c0_g1~~TRINITY_DN1803_c0_g1_i7.p1;ORF_type:complete_(+),score=7.13	0	+	993	1305	0	1	1856	0	No
TRINITY_DN29_c9_g1_i11	.	+	TRINITY_DN1803_c0_g1_i5	0	1093	ID=TRINITY_DN1803_c0_g1_i5.p1;TRINITY_DN1803_c0_g1~~TRINITY_DN1803_c0_g1_i5.p1;ORF_type:complete_(+),score=12.35	0	+	494	806	0	1	1093	0	No
TRINITY_DN29_c9_g1_i11	.	+	TRINITY_DN1803_c0_g1_i13	0	1990	ID=TRINITY_DN1803_c0_g1_i13.p1;TRINITY_DN1803_c0_g1~~TRINITY_DN1803_c0_g1_i13.p1;ORF_type:complete_(+),score=7.13	0	+	1127	1439	0	1	1990	0	No
TRINITY_DN29_c9_g1_i11	.	+	TRINITY_DN1803_c0_g1_i12	0	617	ID=TRINITY_DN1803_c0_g1_i12.p1;TRINITY_DN1803_c0_g1~~TRINITY_DN1803_c0_g1_i12.p1;ORF_type:5prime_partial_(+),score=13.20	0	+	0	330	0	1	617	0	No
TRINITY_DN29_c9_g1_i13	.	+	TRINITY_DN29_c9_g1_i13	0	343	ID=TRINITY_DN29_c9_g1_i13.p1;TRINITY_DN29_c9_g1~~TRINITY_DN29_c9_g1_i13.p1;ORF_type:internal_(+),score=14.09	0	+	0	342	0	1	343	0	No
TRINITY_DN29_c9_g1_i13	.	+	TRINITY_DN29_c9_g1_i8	0	456	ID=TRINITY_DN29_c9_g1_i8.p1;TRINITY_DN29_c9_g1~~TRINITY_DN29_c9_g1_i8.p1;ORF_type:5prime_partial_(+),score=15.72	0	+	0	387	0	1	456	0	No
TRINITY_DN29_c9_g1_i13	.	+	TRINITY_DN29_c9_g1_i16	0	517	ID=TRINITY_DN29_c9_g1_i16.p1;TRINITY_DN29_c9_g1~~TRINITY_DN29_c9_g1_i16.p1;ORF_type:5prime_partial_(+),score=16.04	0	+	0	387	0	1	517	0	No
TRINITY_DN29_c9_g1_i13	.	+	TRINITY_DN5620_c0_g2_i2	0	719	ID=TRINITY_DN5620_c0_g2_i2.p1;TRINITY_DN5620_c0_g2~~TRINITY_DN5620_c0_g2_i2.p1;ORF_type:internal_(+),score=23.11	0	+	1	718	0	1	719	0	No
TRINITY_DN29_c9_g1_i13	.	-	TRINITY_DN3001_c0_g1_i5	0	574	ID=TRINITY_DN3001_c0_g1_i5.p1;TRINITY_DN3001_c0_g1~~TRINITY_DN3001_c0_g1_i5.p1;ORF_type:5prime_partial_(-),score=13.98	0	-	191	572	0	1	574	0	No
TRINITY_DN29_c9_g1_i13	.	-	TRINITY_DN3001_c0_g1_i19	0	481	ID=TRINITY_DN3001_c0_g1_i19.p1;TRINITY_DN3001_c0_g1~~TRINITY_DN3001_c0_g1_i19.p1;ORF_type:5prime_partial_(-),score=13.98	0	-	98	479	0	1	481	0	No
TRINITY_DN29_c9_g1_i13	.	+	TRINITY_DN5620_c0_g1_i8	0	505	ID=TRINITY_DN5620_c0_g1_i8.p1;TRINITY_DN5620_c0_g1~~TRINITY_DN5620_c0_g1_i8.p1;ORF_type:5prime_partial_(+),score=1.73	0	+	1	319	0	1	505	0	No
TRINITY_DN29_c9_g1_i13	.	+	TRINITY_DN5620_c0_g1_i7	0	505	ID=TRINITY_DN5620_c0_g1_i7.p1;TRINITY_DN5620_c0_g1~~TRINITY_DN5620_c0_g1_i7.p1;ORF_type:5prime_partial_(+),score=3.78	0	+	1	319	0	1	505	0	No
TRINITY_DN29_c9_g1_i13	.	-	TRINITY_DN3001_c0_g1_i11	0	499	ID=TRINITY_DN3001_c0_g1_i11.p1;TRINITY_DN3001_c0_g1~~TRINITY_DN3001_c0_g1_i11.p1;ORF_type:5prime_partial_(-),score=16.62	0	-	116	497	0	1	499	0	No
TRINITY_DN29_c9_g1_i13	.	+	TRINITY_DN5620_c0_g1_i4	0	755	ID=TRINITY_DN5620_c0_g1_i4.p1;TRINITY_DN5620_c0_g1~~TRINITY_DN5620_c0_g1_i4.p1;ORF_type:complete_(+),score=6.73	0	+	68	569	0	1	755	0	No
TRINITY_DN29_c9_g1_i13	.	-	TRINITY_DN3001_c0_g1_i1	0	666	ID=TRINITY_DN3001_c0_g1_i1.p1;TRINITY_DN3001_c0_g1~~TRINITY_DN3001_c0_g1_i1.p1;ORF_type:5prime_partial_(-),score=17.60	0	-	136	664	0	1	666	0	No
TRINITY_DN29_c9_g1_i13	.	+	TRINITY_DN3243_c4_g1_i1	0	356	ID=TRINITY_DN3243_c4_g1_i1.p1;TRINITY_DN3243_c4_g1~~TRINITY_DN3243_c4_g1_i1.p1;ORF_type:5prime_partial_(+),score=14.00	0	+	2	356	0	1	356	0	No
TRINITY_DN29_c9_g1_i13	.	-	TRINITY_DN3001_c0_g1_i13	0	305	ID=TRINITY_DN3001_c0_g1_i13.p1;TRINITY_DN3001_c0_g1~~TRINITY_DN3001_c0_g1_i13.p1;ORF_type:internal_(-),score=12.10	0	-	1	304	0	1	305	0	No
TRINITY_DN29_c9_g1_i13	.	+	TRINITY_DN65309_c1_g1_i1	0	366	ID=TRINITY_DN65309_c1_g1_i1.p1;TRINITY_DN65309_c1_g1~~TRINITY_DN65309_c1_g1_i1.p1;ORF_type:internal_(+),score=10.83	0	+	2	365	0	1	366	0	No
TRINITY_DN29_c9_g1_i13	.	+	TRINITY_DN66_c1_g1_i7	0	971	ID=TRINITY_DN66_c1_g1_i7.p1;TRINITY_DN66_c1_g1~~TRINITY_DN66_c1_g1_i7.p1;ORF_type:complete_(+),score=25.52	0	+	60	666	0	1	971	0	No
TRINITY_DN29_c9_g1_i13	.	+	TRINITY_DN66_c1_g1_i27	0	675	ID=TRINITY_DN66_c1_g1_i27.p1;TRINITY_DN66_c1_g1~~TRINITY_DN66_c1_g1_i27.p1;ORF_type:5prime_partial_(+),score=14.62	0	+	1	370	0	1	675	0	No
TRINITY_DN29_c9_g1_i13	.	+	TRINITY_DN1803_c0_g1_i7	0	1856	ID=TRINITY_DN1803_c0_g1_i7.p1;TRINITY_DN1803_c0_g1~~TRINITY_DN1803_c0_g1_i7.p1;ORF_type:complete_(+),score=7.13	0	+	993	1305	0	1	1856	0	No
TRINITY_DN29_c9_g1_i13	.	+	TRINITY_DN1803_c0_g1_i5	0	1093	ID=TRINITY_DN1803_c0_g1_i5.p1;TRINITY_DN1803_c0_g1~~TRINITY_DN1803_c0_g1_i5.p1;ORF_type:complete_(+),score=12.35	0	+	494	806	0	1	1093	0	No
TRINITY_DN29_c9_g1_i13	.	+	TRINITY_DN1803_c0_g1_i13	0	1990	ID=TRINITY_DN1803_c0_g1_i13.p1;TRINITY_DN1803_c0_g1~~TRINITY_DN1803_c0_g1_i13.p1;ORF_type:complete_(+),score=7.13	0	+	1127	1439	0	1	1990	0	No
TRINITY_DN29_c9_g1_i13	.	+	TRINITY_DN1803_c0_g1_i12	0	617	ID=TRINITY_DN1803_c0_g1_i12.p1;TRINITY_DN1803_c0_g1~~TRINITY_DN1803_c0_g1_i12.p1;ORF_type:5prime_partial_(+),score=13.20	0	+	0	330	0	1	617	0	No
TRINITY_DN29_c9_g1_i14	.	+	TRINITY_DN29_c9_g1_i8	0	456	ID=TRINITY_DN29_c9_g1_i8.p1;TRINITY_DN29_c9_g1~~TRINITY_DN29_c9_g1_i8.p1;ORF_type:5prime_partial_(+),score=15.72	0	+	0	387	0	1	456	0	No
TRINITY_DN29_c9_g1_i14	.	+	TRINITY_DN29_c9_g1_i16	0	517	ID=TRINITY_DN29_c9_g1_i16.p1;TRINITY_DN29_c9_g1~~TRINITY_DN29_c9_g1_i16.p1;ORF_type:5prime_partial_(+),score=16.04	0	+	0	387	0	1	517	0	No
TRINITY_DN29_c9_g1_i14	.	+	TRINITY_DN29_c9_g1_i13	0	343	ID=TRINITY_DN29_c9_g1_i13.p1;TRINITY_DN29_c9_g1~~TRINITY_DN29_c9_g1_i13.p1;ORF_type:internal_(+),score=14.09	0	+	0	342	0	1	343	0	No
TRINITY_DN29_c9_g1_i14	.	+	TRINITY_DN1803_c0_g1_i7	0	1856	ID=TRINITY_DN1803_c0_g1_i7.p1;TRINITY_DN1803_c0_g1~~TRINITY_DN1803_c0_g1_i7.p1;ORF_type:complete_(+),score=7.13	0	+	993	1305	0	1	1856	0	No
TRINITY_DN29_c9_g1_i14	.	+	TRINITY_DN1803_c0_g1_i5	0	1093	ID=TRINITY_DN1803_c0_g1_i5.p1;TRINITY_DN1803_c0_g1~~TRINITY_DN1803_c0_g1_i5.p1;ORF_type:complete_(+),score=12.35	0	+	494	806	0	1	1093	0	No
TRINITY_DN29_c9_g1_i14	.	+	TRINITY_DN1803_c0_g1_i13	0	1990	ID=TRINITY_DN1803_c0_g1_i13.p1;TRINITY_DN1803_c0_g1~~TRINITY_DN1803_c0_g1_i13.p1;ORF_type:complete_(+),score=7.13	0	+	1127	1439	0	1	1990	0	No
TRINITY_DN29_c9_g1_i14	.	+	TRINITY_DN1803_c0_g1_i12	0	617	ID=TRINITY_DN1803_c0_g1_i12.p1;TRINITY_DN1803_c0_g1~~TRINITY_DN1803_c0_g1_i12.p1;ORF_type:5prime_partial_(+),score=13.20	0	+	0	330	0	1	617	0	No
TRINITY_DN29_c9_g1_i14	.	+	TRINITY_DN5620_c0_g2_i2	0	719	ID=TRINITY_DN5620_c0_g2_i2.p1;TRINITY_DN5620_c0_g2~~TRINITY_DN5620_c0_g2_i2.p1;ORF_type:internal_(+),score=23.11	0	+	1	718	0	1	719	0	No
TRINITY_DN29_c9_g1_i16	.	+	TRINITY_DN29_c9_g1_i16	0	517	ID=TRINITY_DN29_c9_g1_i16.p1;TRINITY_DN29_c9_g1~~TRINITY_DN29_c9_g1_i16.p1;ORF_type:5prime_partial_(+),score=16.04	0	+	0	387	0	1	517	0	No
TRINITY_DN29_c9_g1_i16	.	+	TRINITY_DN29_c9_g1_i8	0	456	ID=TRINITY_DN29_c9_g1_i8.p1;TRINITY_DN29_c9_g1~~TRINITY_DN29_c9_g1_i8.p1;ORF_type:5prime_partial_(+),score=15.72	0	+	0	387	0	1	456	0	No
TRINITY_DN29_c9_g1_i16	.	-	TRINITY_DN3001_c0_g1_i5	0	574	ID=TRINITY_DN3001_c0_g1_i5.p1;TRINITY_DN3001_c0_g1~~TRINITY_DN3001_c0_g1_i5.p1;ORF_type:5prime_partial_(-),score=13.98	0	-	191	572	0	1	574	0	No
TRINITY_DN29_c9_g1_i16	.	+	TRINITY_DN29_c9_g1_i13	0	343	ID=TRINITY_DN29_c9_g1_i13.p1;TRINITY_DN29_c9_g1~~TRINITY_DN29_c9_g1_i13.p1;ORF_type:internal_(+),score=14.09	0	+	0	342	0	1	343	0	No
TRINITY_DN29_c9_g1_i16	.	-	TRINITY_DN3001_c0_g1_i19	0	481	ID=TRINITY_DN3001_c0_g1_i19.p1;TRINITY_DN3001_c0_g1~~TRINITY_DN3001_c0_g1_i19.p1;ORF_type:5prime_partial_(-),score=13.98	0	-	98	479	0	1	481	0	No
TRINITY_DN29_c9_g1_i16	.	-	TRINITY_DN3001_c0_g1_i11	0	499	ID=TRINITY_DN3001_c0_g1_i11.p1;TRINITY_DN3001_c0_g1~~TRINITY_DN3001_c0_g1_i11.p1;ORF_type:5prime_partial_(-),score=16.62	0	-	116	497	0	1	499	0	No
TRINITY_DN29_c9_g1_i16	.	-	TRINITY_DN3001_c0_g1_i1	0	666	ID=TRINITY_DN3001_c0_g1_i1.p1;TRINITY_DN3001_c0_g1~~TRINITY_DN3001_c0_g1_i1.p1;ORF_type:5prime_partial_(-),score=17.60	0	-	136	664	0	1	666	0	No
TRINITY_DN29_c9_g1_i16	.	+	TRINITY_DN5620_c0_g2_i2	0	719	ID=TRINITY_DN5620_c0_g2_i2.p1;TRINITY_DN5620_c0_g2~~TRINITY_DN5620_c0_g2_i2.p1;ORF_type:internal_(+),score=23.11	0	+	1	718	0	1	719	0	No
TRINITY_DN29_c9_g1_i16	.	+	TRINITY_DN5620_c0_g1_i8	0	505	ID=TRINITY_DN5620_c0_g1_i8.p1;TRINITY_DN5620_c0_g1~~TRINITY_DN5620_c0_g1_i8.p1;ORF_type:5prime_partial_(+),score=1.73	0	+	1	319	0	1	505	0	No
TRINITY_DN29_c9_g1_i16	.	+	TRINITY_DN5620_c0_g1_i7	0	505	ID=TRINITY_DN5620_c0_g1_i7.p1;TRINITY_DN5620_c0_g1~~TRINITY_DN5620_c0_g1_i7.p1;ORF_type:5prime_partial_(+),score=3.78	0	+	1	319	0	1	505	0	No
TRINITY_DN29_c9_g1_i16	.	-	TRINITY_DN3001_c0_g1_i13	0	305	ID=TRINITY_DN3001_c0_g1_i13.p1;TRINITY_DN3001_c0_g1~~TRINITY_DN3001_c0_g1_i13.p1;ORF_type:internal_(-),score=12.10	0	-	1	304	0	1	305	0	No
TRINITY_DN29_c9_g1_i16	.	+	TRINITY_DN5620_c0_g1_i4	0	755	ID=TRINITY_DN5620_c0_g1_i4.p1;TRINITY_DN5620_c0_g1~~TRINITY_DN5620_c0_g1_i4.p1;ORF_type:complete_(+),score=6.73	0	+	68	569	0	1	755	0	No
TRINITY_DN29_c9_g1_i16	.	+	TRINITY_DN3243_c4_g1_i1	0	356	ID=TRINITY_DN3243_c4_g1_i1.p1;TRINITY_DN3243_c4_g1~~TRINITY_DN3243_c4_g1_i1.p1;ORF_type:5prime_partial_(+),score=14.00	0	+	2	356	0	1	356	0	No
TRINITY_DN29_c9_g1_i16	.	+	TRINITY_DN65309_c1_g1_i1	0	366	ID=TRINITY_DN65309_c1_g1_i1.p1;TRINITY_DN65309_c1_g1~~TRINITY_DN65309_c1_g1_i1.p1;ORF_type:internal_(+),score=10.83	0	+	2	365	0	1	366	0	No
TRINITY_DN29_c9_g1_i16	.	+	TRINITY_DN66_c1_g1_i7	0	971	ID=TRINITY_DN66_c1_g1_i7.p1;TRINITY_DN66_c1_g1~~TRINITY_DN66_c1_g1_i7.p1;ORF_type:complete_(+),score=25.52	0	+	60	666	0	1	971	0	No
TRINITY_DN29_c9_g1_i16	.	+	TRINITY_DN66_c1_g1_i27	0	675	ID=TRINITY_DN66_c1_g1_i27.p1;TRINITY_DN66_c1_g1~~TRINITY_DN66_c1_g1_i27.p1;ORF_type:5prime_partial_(+),score=14.62	0	+	1	370	0	1	675	0	No
TRINITY_DN29_c9_g1_i16	.	+	TRINITY_DN1803_c0_g1_i7	0	1856	ID=TRINITY_DN1803_c0_g1_i7.p1;TRINITY_DN1803_c0_g1~~TRINITY_DN1803_c0_g1_i7.p1;ORF_type:complete_(+),score=7.13	0	+	993	1305	0	1	1856	0	No
TRINITY_DN29_c9_g1_i16	.	+	TRINITY_DN1803_c0_g1_i5	0	1093	ID=TRINITY_DN1803_c0_g1_i5.p1;TRINITY_DN1803_c0_g1~~TRINITY_DN1803_c0_g1_i5.p1;ORF_type:complete_(+),score=12.35	0	+	494	806	0	1	1093	0	No
TRINITY_DN29_c9_g1_i16	.	+	TRINITY_DN1803_c0_g1_i13	0	1990	ID=TRINITY_DN1803_c0_g1_i13.p1;TRINITY_DN1803_c0_g1~~TRINITY_DN1803_c0_g1_i13.p1;ORF_type:complete_(+),score=7.13	0	+	1127	1439	0	1	1990	0	No
TRINITY_DN29_c9_g1_i16	.	+	TRINITY_DN1803_c0_g1_i12	0	617	ID=TRINITY_DN1803_c0_g1_i12.p1;TRINITY_DN1803_c0_g1~~TRINITY_DN1803_c0_g1_i12.p1;ORF_type:5prime_partial_(+),score=13.20	0	+	0	330	0	1	617	0	No
TRINITY_DN29_c9_g1_i2	.	+	TRINITY_DN29_c9_g1_i16	0	517	ID=TRINITY_DN29_c9_g1_i16.p1;TRINITY_DN29_c9_g1~~TRINITY_DN29_c9_g1_i16.p1;ORF_type:5prime_partial_(+),score=16.04	0	+	0	387	0	1	517	0	No
TRINITY_DN29_c9_g1_i2	.	+	TRINITY_DN29_c9_g1_i8	0	456	ID=TRINITY_DN29_c9_g1_i8.p1;TRINITY_DN29_c9_g1~~TRINITY_DN29_c9_g1_i8.p1;ORF_type:5prime_partial_(+),score=15.72	0	+	0	387	0	1	456	0	No
TRINITY_DN29_c9_g1_i2	.	-	TRINITY_DN3001_c0_g1_i19	0	481	ID=TRINITY_DN3001_c0_g1_i19.p1;TRINITY_DN3001_c0_g1~~TRINITY_DN3001_c0_g1_i19.p1;ORF_type:5prime_partial_(-),score=13.98	0	-	98	479	0	1	481	0	No
TRINITY_DN29_c9_g1_i2	.	-	TRINITY_DN3001_c0_g1_i5	0	574	ID=TRINITY_DN3001_c0_g1_i5.p1;TRINITY_DN3001_c0_g1~~TRINITY_DN3001_c0_g1_i5.p1;ORF_type:5prime_partial_(-),score=13.98	0	-	191	572	0	1	574	0	No
TRINITY_DN29_c9_g1_i2	.	-	TRINITY_DN3001_c0_g1_i11	0	499	ID=TRINITY_DN3001_c0_g1_i11.p1;TRINITY_DN3001_c0_g1~~TRINITY_DN3001_c0_g1_i11.p1;ORF_type:5prime_partial_(-),score=16.62	0	-	116	497	0	1	499	0	No
TRINITY_DN29_c9_g1_i2	.	-	TRINITY_DN3001_c0_g1_i1	0	666	ID=TRINITY_DN3001_c0_g1_i1.p1;TRINITY_DN3001_c0_g1~~TRINITY_DN3001_c0_g1_i1.p1;ORF_type:5prime_partial_(-),score=17.60	0	-	136	664	0	1	666	0	No
TRINITY_DN29_c9_g1_i2	.	-	TRINITY_DN3001_c0_g1_i13	0	305	ID=TRINITY_DN3001_c0_g1_i13.p1;TRINITY_DN3001_c0_g1~~TRINITY_DN3001_c0_g1_i13.p1;ORF_type:internal_(-),score=12.10	0	-	1	304	0	1	305	0	No
TRINITY_DN29_c9_g1_i2	.	+	TRINITY_DN29_c9_g1_i13	0	343	ID=TRINITY_DN29_c9_g1_i13.p1;TRINITY_DN29_c9_g1~~TRINITY_DN29_c9_g1_i13.p1;ORF_type:internal_(+),score=14.09	0	+	0	342	0	1	343	0	No
TRINITY_DN29_c9_g1_i2	.	+	TRINITY_DN5620_c0_g2_i2	0	719	ID=TRINITY_DN5620_c0_g2_i2.p1;TRINITY_DN5620_c0_g2~~TRINITY_DN5620_c0_g2_i2.p1;ORF_type:internal_(+),score=23.11	0	+	1	718	0	1	719	0	No
TRINITY_DN29_c9_g1_i2	.	+	TRINITY_DN5620_c0_g1_i8	0	505	ID=TRINITY_DN5620_c0_g1_i8.p1;TRINITY_DN5620_c0_g1~~TRINITY_DN5620_c0_g1_i8.p1;ORF_type:5prime_partial_(+),score=1.73	0	+	1	319	0	1	505	0	No
TRINITY_DN29_c9_g1_i2	.	+	TRINITY_DN5620_c0_g1_i7	0	505	ID=TRINITY_DN5620_c0_g1_i7.p1;TRINITY_DN5620_c0_g1~~TRINITY_DN5620_c0_g1_i7.p1;ORF_type:5prime_partial_(+),score=3.78	0	+	1	319	0	1	505	0	No
TRINITY_DN29_c9_g1_i2	.	+	TRINITY_DN5620_c0_g1_i4	0	755	ID=TRINITY_DN5620_c0_g1_i4.p1;TRINITY_DN5620_c0_g1~~TRINITY_DN5620_c0_g1_i4.p1;ORF_type:complete_(+),score=6.73	0	+	68	569	0	1	755	0	No
TRINITY_DN29_c9_g1_i2	.	+	TRINITY_DN3243_c4_g1_i1	0	356	ID=TRINITY_DN3243_c4_g1_i1.p1;TRINITY_DN3243_c4_g1~~TRINITY_DN3243_c4_g1_i1.p1;ORF_type:5prime_partial_(+),score=14.00	0	+	2	356	0	1	356	0	No
TRINITY_DN29_c9_g1_i5	.	+	TRINITY_DN29_c9_g1_i8	0	456	ID=TRINITY_DN29_c9_g1_i8.p1;TRINITY_DN29_c9_g1~~TRINITY_DN29_c9_g1_i8.p1;ORF_type:5prime_partial_(+),score=15.72	0	+	0	387	0	1	456	0	No
TRINITY_DN29_c9_g1_i5	.	+	TRINITY_DN29_c9_g1_i16	0	517	ID=TRINITY_DN29_c9_g1_i16.p1;TRINITY_DN29_c9_g1~~TRINITY_DN29_c9_g1_i16.p1;ORF_type:5prime_partial_(+),score=16.04	0	+	0	387	0	1	517	0	No
TRINITY_DN29_c9_g1_i5	.	+	TRINITY_DN29_c9_g1_i13	0	343	ID=TRINITY_DN29_c9_g1_i13.p1;TRINITY_DN29_c9_g1~~TRINITY_DN29_c9_g1_i13.p1;ORF_type:internal_(+),score=14.09	0	+	0	342	0	1	343	0	No
TRINITY_DN29_c9_g1_i5	.	+	TRINITY_DN5620_c0_g2_i2	0	719	ID=TRINITY_DN5620_c0_g2_i2.p1;TRINITY_DN5620_c0_g2~~TRINITY_DN5620_c0_g2_i2.p1;ORF_type:internal_(+),score=23.11	0	+	1	718	0	1	719	0	No
TRINITY_DN29_c9_g1_i5	.	+	TRINITY_DN65309_c1_g1_i1	0	366	ID=TRINITY_DN65309_c1_g1_i1.p1;TRINITY_DN65309_c1_g1~~TRINITY_DN65309_c1_g1_i1.p1;ORF_type:internal_(+),score=10.83	0	+	2	365	0	1	366	0	No
TRINITY_DN29_c9_g1_i5	.	+	TRINITY_DN1803_c0_g1_i7	0	1856	ID=TRINITY_DN1803_c0_g1_i7.p1;TRINITY_DN1803_c0_g1~~TRINITY_DN1803_c0_g1_i7.p1;ORF_type:complete_(+),score=7.13	0	+	993	1305	0	1	1856	0	No
TRINITY_DN29_c9_g1_i5	.	+	TRINITY_DN1803_c0_g1_i5	0	1093	ID=TRINITY_DN1803_c0_g1_i5.p1;TRINITY_DN1803_c0_g1~~TRINITY_DN1803_c0_g1_i5.p1;ORF_type:complete_(+),score=12.35	0	+	494	806	0	1	1093	0	No
TRINITY_DN29_c9_g1_i5	.	+	TRINITY_DN1803_c0_g1_i13	0	1990	ID=TRINITY_DN1803_c0_g1_i13.p1;TRINITY_DN1803_c0_g1~~TRINITY_DN1803_c0_g1_i13.p1;ORF_type:complete_(+),score=7.13	0	+	1127	1439	0	1	1990	0	No
TRINITY_DN29_c9_g1_i5	.	+	TRINITY_DN1803_c0_g1_i12	0	617	ID=TRINITY_DN1803_c0_g1_i12.p1;TRINITY_DN1803_c0_g1~~TRINITY_DN1803_c0_g1_i12.p1;ORF_type:5prime_partial_(+),score=13.20	0	+	0	330	0	1	617	0	No
TRINITY_DN29_c9_g1_i6	.	+	TRINITY_DN65309_c1_g1_i1	0	366	ID=TRINITY_DN65309_c1_g1_i1.p1;TRINITY_DN65309_c1_g1~~TRINITY_DN65309_c1_g1_i1.p1;ORF_type:internal_(+),score=10.83	0	+	2	365	0	1	366	0	No
TRINITY_DN29_c9_g1_i6	.	+	TRINITY_DN29_c9_g1_i8	0	456	ID=TRINITY_DN29_c9_g1_i8.p1;TRINITY_DN29_c9_g1~~TRINITY_DN29_c9_g1_i8.p1;ORF_type:5prime_partial_(+),score=15.72	0	+	0	387	0	1	456	0	No
TRINITY_DN29_c9_g1_i6	.	+	TRINITY_DN29_c9_g1_i16	0	517	ID=TRINITY_DN29_c9_g1_i16.p1;TRINITY_DN29_c9_g1~~TRINITY_DN29_c9_g1_i16.p1;ORF_type:5prime_partial_(+),score=16.04	0	+	0	387	0	1	517	0	No
TRINITY_DN29_c9_g1_i6	.	+	TRINITY_DN29_c9_g1_i13	0	343	ID=TRINITY_DN29_c9_g1_i13.p1;TRINITY_DN29_c9_g1~~TRINITY_DN29_c9_g1_i13.p1;ORF_type:internal_(+),score=14.09	0	+	0	342	0	1	343	0	No
TRINITY_DN29_c9_g1_i8	.	+	TRINITY_DN29_c9_g1_i8	0	456	ID=TRINITY_DN29_c9_g1_i8.p1;TRINITY_DN29_c9_g1~~TRINITY_DN29_c9_g1_i8.p1;ORF_type:5prime_partial_(+),score=15.72	0	+	0	387	0	1	456	0	No
TRINITY_DN29_c9_g1_i8	.	+	TRINITY_DN29_c9_g1_i16	0	517	ID=TRINITY_DN29_c9_g1_i16.p1;TRINITY_DN29_c9_g1~~TRINITY_DN29_c9_g1_i16.p1;ORF_type:5prime_partial_(+),score=16.04	0	+	0	387	0	1	517	0	No
TRINITY_DN29_c9_g1_i8	.	+	TRINITY_DN29_c9_g1_i13	0	343	ID=TRINITY_DN29_c9_g1_i13.p1;TRINITY_DN29_c9_g1~~TRINITY_DN29_c9_g1_i13.p1;ORF_type:internal_(+),score=14.09	0	+	0	342	0	1	343	0	No
TRINITY_DN29_c9_g1_i8	.	-	TRINITY_DN3001_c0_g1_i19	0	481	ID=TRINITY_DN3001_c0_g1_i19.p1;TRINITY_DN3001_c0_g1~~TRINITY_DN3001_c0_g1_i19.p1;ORF_type:5prime_partial_(-),score=13.98	0	-	98	479	0	1	481	0	No
TRINITY_DN29_c9_g1_i8	.	-	TRINITY_DN3001_c0_g1_i5	0	574	ID=TRINITY_DN3001_c0_g1_i5.p1;TRINITY_DN3001_c0_g1~~TRINITY_DN3001_c0_g1_i5.p1;ORF_type:5prime_partial_(-),score=13.98	0	-	191	572	0	1	574	0	No
TRINITY_DN29_c9_g1_i8	.	-	TRINITY_DN3001_c0_g1_i11	0	499	ID=TRINITY_DN3001_c0_g1_i11.p1;TRINITY_DN3001_c0_g1~~TRINITY_DN3001_c0_g1_i11.p1;ORF_type:5prime_partial_(-),score=16.62	0	-	116	497	0	1	499	0	No
TRINITY_DN29_c9_g1_i8	.	-	TRINITY_DN3001_c0_g1_i1	0	666	ID=TRINITY_DN3001_c0_g1_i1.p1;TRINITY_DN3001_c0_g1~~TRINITY_DN3001_c0_g1_i1.p1;ORF_type:5prime_partial_(-),score=17.60	0	-	136	664	0	1	666	0	No
TRINITY_DN29_c9_g1_i8	.	+	TRINITY_DN5620_c0_g2_i2	0	719	ID=TRINITY_DN5620_c0_g2_i2.p1;TRINITY_DN5620_c0_g2~~TRINITY_DN5620_c0_g2_i2.p1;ORF_type:internal_(+),score=23.11	0	+	1	718	0	1	719	0	No
TRINITY_DN29_c9_g1_i8	.	+	TRINITY_DN5620_c0_g1_i8	0	505	ID=TRINITY_DN5620_c0_g1_i8.p1;TRINITY_DN5620_c0_g1~~TRINITY_DN5620_c0_g1_i8.p1;ORF_type:5prime_partial_(+),score=1.73	0	+	1	319	0	1	505	0	No
TRINITY_DN29_c9_g1_i8	.	+	TRINITY_DN5620_c0_g1_i7	0	505	ID=TRINITY_DN5620_c0_g1_i7.p1;TRINITY_DN5620_c0_g1~~TRINITY_DN5620_c0_g1_i7.p1;ORF_type:5prime_partial_(+),score=3.78	0	+	1	319	0	1	505	0	No
TRINITY_DN29_c9_g1_i8	.	-	TRINITY_DN3001_c0_g1_i13	0	305	ID=TRINITY_DN3001_c0_g1_i13.p1;TRINITY_DN3001_c0_g1~~TRINITY_DN3001_c0_g1_i13.p1;ORF_type:internal_(-),score=12.10	0	-	1	304	0	1	305	0	No
TRINITY_DN29_c9_g1_i8	.	+	TRINITY_DN5620_c0_g1_i4	0	755	ID=TRINITY_DN5620_c0_g1_i4.p1;TRINITY_DN5620_c0_g1~~TRINITY_DN5620_c0_g1_i4.p1;ORF_type:complete_(+),score=6.73	0	+	68	569	0	1	755	0	No
TRINITY_DN29_c9_g1_i8	.	+	TRINITY_DN3243_c4_g1_i1	0	356	ID=TRINITY_DN3243_c4_g1_i1.p1;TRINITY_DN3243_c4_g1~~TRINITY_DN3243_c4_g1_i1.p1;ORF_type:5prime_partial_(+),score=14.00	0	+	2	356	0	1	356	0	No
TRINITY_DN29_c9_g1_i8	.	+	TRINITY_DN65309_c1_g1_i1	0	366	ID=TRINITY_DN65309_c1_g1_i1.p1;TRINITY_DN65309_c1_g1~~TRINITY_DN65309_c1_g1_i1.p1;ORF_type:internal_(+),score=10.83	0	+	2	365	0	1	366	0	No
TRINITY_DN29_c9_g1_i8	.	+	TRINITY_DN66_c1_g1_i7	0	971	ID=TRINITY_DN66_c1_g1_i7.p1;TRINITY_DN66_c1_g1~~TRINITY_DN66_c1_g1_i7.p1;ORF_type:complete_(+),score=25.52	0	+	60	666	0	1	971	0	No
TRINITY_DN29_c9_g1_i8	.	+	TRINITY_DN66_c1_g1_i27	0	675	ID=TRINITY_DN66_c1_g1_i27.p1;TRINITY_DN66_c1_g1~~TRINITY_DN66_c1_g1_i27.p1;ORF_type:5prime_partial_(+),score=14.62	0	+	1	370	0	1	675	0	No
TRINITY_DN29_c9_g1_i8	.	+	TRINITY_DN1803_c0_g1_i7	0	1856	ID=TRINITY_DN1803_c0_g1_i7.p1;TRINITY_DN1803_c0_g1~~TRINITY_DN1803_c0_g1_i7.p1;ORF_type:complete_(+),score=7.13	0	+	993	1305	0	1	1856	0	No
TRINITY_DN29_c9_g1_i8	.	+	TRINITY_DN1803_c0_g1_i5	0	1093	ID=TRINITY_DN1803_c0_g1_i5.p1;TRINITY_DN1803_c0_g1~~TRINITY_DN1803_c0_g1_i5.p1;ORF_type:complete_(+),score=12.35	0	+	494	806	0	1	1093	0	No
TRINITY_DN29_c9_g1_i8	.	+	TRINITY_DN1803_c0_g1_i13	0	1990	ID=TRINITY_DN1803_c0_g1_i13.p1;TRINITY_DN1803_c0_g1~~TRINITY_DN1803_c0_g1_i13.p1;ORF_type:complete_(+),score=7.13	0	+	1127	1439	0	1	1990	0	No
TRINITY_DN29_c9_g1_i8	.	+	TRINITY_DN1803_c0_g1_i12	0	617	ID=TRINITY_DN1803_c0_g1_i12.p1;TRINITY_DN1803_c0_g1~~TRINITY_DN1803_c0_g1_i12.p1;ORF_type:5prime_partial_(+),score=13.20	0	+	0	330	0	1	617	0	No
TRINITY_DN29_c9_g2_i1	.	-	TRINITY_DN3001_c0_g1_i5	0	574	ID=TRINITY_DN3001_c0_g1_i5.p1;TRINITY_DN3001_c0_g1~~TRINITY_DN3001_c0_g1_i5.p1;ORF_type:5prime_partial_(-),score=13.98	0	-	191	572	0	1	574	0	No
TRINITY_DN29_c9_g2_i1	.	-	TRINITY_DN3001_c0_g1_i10	0	574	ID=TRINITY_DN3001_c0_g1_i10.p1;TRINITY_DN3001_c0_g1~~TRINITY_DN3001_c0_g1_i10.p1;ORF_type:5prime_partial_(-),score=10.80	0	-	242	572	0	1	574	0	No
TRINITY_DN29_c9_g2_i1	.	-	TRINITY_DN3001_c0_g1_i11	0	499	ID=TRINITY_DN3001_c0_g1_i11.p1;TRINITY_DN3001_c0_g1~~TRINITY_DN3001_c0_g1_i11.p1;ORF_type:5prime_partial_(-),score=16.62	0	-	116	497	0	1	499	0	No
TRINITY_DN29_c9_g2_i1	.	-	TRINITY_DN3001_c0_g1_i19	0	481	ID=TRINITY_DN3001_c0_g1_i19.p1;TRINITY_DN3001_c0_g1~~TRINITY_DN3001_c0_g1_i19.p1;ORF_type:5prime_partial_(-),score=13.98	0	-	98	479	0	1	481	0	No
TRINITY_DN29_c11_g1_i2	.	+	TRINITY_DN10480_c2_g3_i1	0	714	ID=TRINITY_DN10480_c2_g3_i1.p1;TRINITY_DN10480_c2_g3~~TRINITY_DN10480_c2_g3_i1.p1;ORF_type:5prime_partial_(+),score=8.35	0	+	1	427	0	1	714	0	No
TRINITY_DN29_c11_g1_i5	.	-	TRINITY_DN3001_c0_g1_i5	0	574	ID=TRINITY_DN3001_c0_g1_i5.p1;TRINITY_DN3001_c0_g1~~TRINITY_DN3001_c0_g1_i5.p1;ORF_type:5prime_partial_(-),score=13.98	0	-	191	572	0	1	574	0	No
TRINITY_DN29_c11_g1_i5	.	-	TRINITY_DN3001_c0_g1_i10	0	574	ID=TRINITY_DN3001_c0_g1_i10.p1;TRINITY_DN3001_c0_g1~~TRINITY_DN3001_c0_g1_i10.p1;ORF_type:5prime_partial_(-),score=10.80	0	-	242	572	0	1	574	0	No
TRINITY_DN29_c12_g1_i1	.	+	TRINITY_DN26820_c0_g1_i1	0	1882	ID=TRINITY_DN26820_c0_g1_i1.p1;TRINITY_DN26820_c0_g1~~TRINITY_DN26820_c0_g1_i1.p1;ORF_type:complete_(+),score=35.92	0	+	1229	1745	0	1	1882	0	No
TRINITY_DN29_c14_g1_i1	.	-	TRINITY_DN1345_c0_g1_i69	0	1245	ID=TRINITY_DN1345_c0_g1_i69.p1;TRINITY_DN1345_c0_g1~~TRINITY_DN1345_c0_g1_i69.p1;ORF_type:complete_(+),score=111.38	0	+	63	1137	0	1	1245	0	No
TRINITY_DN29_c22_g1_i1	.	+	TRINITY_DN5430_c0_g1_i15	0	1803	ID=TRINITY_DN5430_c0_g1_i15.p1;TRINITY_DN5430_c0_g1~~TRINITY_DN5430_c0_g1_i15.p1;ORF_type:complete_(+),score=21.41	0	+	539	1445	0	1	1803	0	No
TRINITY_DN29_c22_g1_i1	.	-	TRINITY_DN68255_c0_g1_i1	0	1817	ID=TRINITY_DN68255_c0_g1_i1.p1;TRINITY_DN68255_c0_g1~~TRINITY_DN68255_c0_g1_i1.p1;ORF_type:5prime_partial_(-),score=3.54	0	-	1474	1816	0	1	1817	0	No
TRINITY_DN29_c22_g1_i1	.	-	TRINITY_DN1725_c1_g1_i7	0	5308	ID=TRINITY_DN1725_c1_g1_i7.p4;TRINITY_DN1725_c1_g1~~TRINITY_DN1725_c1_g1_i7.p4;ORF_type:complete_(-),score=13.26	0	-	2544	2955	0	1	5308	0	No
TRINITY_DN29_c22_g1_i1	.	-	TRINITY_DN1725_c1_g1_i7	0	5308	ID=TRINITY_DN1725_c1_g1_i7.p1;TRINITY_DN1725_c1_g1~~TRINITY_DN1725_c1_g1_i7.p1;ORF_type:complete_(-),score=26.94	0	-	88	670	0	1	5308	0	No
TRINITY_DN29_c22_g1_i1	.	-	TRINITY_DN1725_c1_g1_i7	0	5308	ID=TRINITY_DN1725_c1_g1_i7.p3;TRINITY_DN1725_c1_g1~~TRINITY_DN1725_c1_g1_i7.p3;ORF_type:complete_(-),score=7.41	0	-	1377	1863	0	1	5308	0	No
TRINITY_DN29_c22_g1_i1	.	-	TRINITY_DN1725_c1_g1_i7	0	5308	ID=TRINITY_DN1725_c1_g1_i7.p2;TRINITY_DN1725_c1_g1~~TRINITY_DN1725_c1_g1_i7.p2;ORF_type:complete_(-),score=15.70	0	-	3979	4483	0	1	5308	0	No
TRINITY_DN29_c22_g1_i1	.	+	TRINITY_DN51_c1_g1_i1	0	1095	ID=TRINITY_DN51_c1_g1_i1.p1;TRINITY_DN51_c1_g1~~TRINITY_DN51_c1_g1_i1.p1;ORF_type:3prime_partial_(-),score=42.14	0	-	2	755	0	1	1095	0	No
TRINITY_DN29_c22_g1_i1	.	+	TRINITY_DN5430_c0_g1_i12	0	1776	ID=TRINITY_DN5430_c0_g1_i12.p1;TRINITY_DN5430_c0_g1~~TRINITY_DN5430_c0_g1_i12.p1;ORF_type:complete_(+),score=21.41	0	+	539	1445	0	1	1776	0	No
TRINITY_DN29_c22_g1_i1	.	+	TRINITY_DN99743_c0_g1_i1	0	517	ID=TRINITY_DN99743_c0_g1_i1.p1;TRINITY_DN99743_c0_g1~~TRINITY_DN99743_c0_g1_i1.p1;ORF_type:5prime_partial_(-),score=0.45	0	-	214	517	0	1	517	0	No
TRINITY_DN29_c33_g1_i1	.	+	TRINITY_DN29_c33_g1_i3	0	328	ID=TRINITY_DN29_c33_g1_i3.p1;TRINITY_DN29_c33_g1~~TRINITY_DN29_c33_g1_i3.p1;ORF_type:5prime_partial_(-),score=18.79	0	-	13	328	0	1	328	0	No
TRINITY_DN29_c33_g1_i1	.	-	TRINITY_DN11569_c1_g3_i1	0	559	ID=TRINITY_DN11569_c1_g3_i1.p1;TRINITY_DN11569_c1_g3~~TRINITY_DN11569_c1_g3_i1.p1;ORF_type:5prime_partial_(+),score=23.77	0	+	2	461	0	1	559	0	No
TRINITY_DN29_c33_g1_i1	.	+	TRINITY_DN22233_c2_g1_i1	0	335	ID=TRINITY_DN22233_c2_g1_i1.p1;TRINITY_DN22233_c2_g1~~TRINITY_DN22233_c2_g1_i1.p1;ORF_type:3prime_partial_(-),score=20.30	0	-	2	335	0	1	335	0	No
TRINITY_DN29_c56_g1_i1	.	-	TRINITY_DN2724_c2_g2_i1	0	1807	ID=TRINITY_DN2724_c2_g2_i1.p1;TRINITY_DN2724_c2_g2~~TRINITY_DN2724_c2_g2_i1.p1;ORF_type:3prime_partial_(+),score=11.07	0	+	1420	1807	0	1	1807	0	No
TRINITY_DN29_c56_g1_i1	.	+	TRINITY_DN14493_c0_g1_i1	0	318	ID=TRINITY_DN14493_c0_g1_i1.p1;TRINITY_DN14493_c0_g1~~TRINITY_DN14493_c0_g1_i1.p1;ORF_type:internal_(+),score=1.21	0	+	2	317	0	1	318	0	No
TRINITY_DN29_c73_g1_i1	.	+	TRINITY_DN8274_c3_g1_i1	0	2620	ID=TRINITY_DN8274_c3_g1_i1.p1;TRINITY_DN8274_c3_g1~~TRINITY_DN8274_c3_g1_i1.p1;ORF_type:complete_(+),score=22.18	0	+	488	797	0	1	2620	0	No
TRINITY_DN29_c73_g1_i2	.	+	TRINITY_DN8274_c3_g1_i1	0	2620	ID=TRINITY_DN8274_c3_g1_i1.p1;TRINITY_DN8274_c3_g1~~TRINITY_DN8274_c3_g1_i1.p1;ORF_type:complete_(+),score=22.18	0	+	488	797	0	1	2620	0	No
TRINITY_DN29_c142_g1_i1	.	-	TRINITY_DN14489_c0_g6_i1	0	518	ID=TRINITY_DN14489_c0_g6_i1.p3;TRINITY_DN14489_c0_g6~~TRINITY_DN14489_c0_g6_i1.p3;ORF_type:5prime_partial_(-),score=15.27	0	-	215	518	0	1	518	0	No
TRINITY_DN29_c142_g1_i1	.	+	TRINITY_DN7524_c0_g1_i2	0	397	ID=TRINITY_DN7524_c0_g1_i2.p1;TRINITY_DN7524_c0_g1~~TRINITY_DN7524_c0_g1_i2.p1;ORF_type:internal_(+),score=1.98	0	+	1	397	0	1	397	0	No
TRINITY_DN26_c2_g1_i1	.	+	TRINITY_DN26_c2_g1_i17	0	1082	ID=TRINITY_DN26_c2_g1_i17.p1;TRINITY_DN26_c2_g1~~TRINITY_DN26_c2_g1_i17.p1;ORF_type:3prime_partial_(-),score=67.28	0	-	0	807	0	1	1082	0	No
TRINITY_DN26_c2_g1_i1	.	+	TRINITY_DN26_c2_g1_i3	0	4097	ID=TRINITY_DN26_c2_g1_i3.p1;TRINITY_DN26_c2_g1~~TRINITY_DN26_c2_g1_i3.p1;ORF_type:complete_(-),score=98.10	0	-	2346	3822	0	1	4097	0	No
TRINITY_DN26_c2_g1_i1	.	+	TRINITY_DN26_c2_g1_i3	0	4097	ID=TRINITY_DN26_c2_g1_i3.p3;TRINITY_DN26_c2_g1~~TRINITY_DN26_c2_g1_i3.p3;ORF_type:complete_(+),score=5.18	0	+	1246	1549	0	1	4097	0	No
TRINITY_DN26_c2_g1_i1	.	+	TRINITY_DN26_c2_g1_i3	0	4097	ID=TRINITY_DN26_c2_g1_i3.p2;TRINITY_DN26_c2_g1~~TRINITY_DN26_c2_g1_i3.p2;ORF_type:complete_(+),score=60.28	0	+	109	1183	0	1	4097	0	No
TRINITY_DN26_c2_g1_i1	.	+	TRINITY_DN26_c2_g1_i22	0	4537	ID=TRINITY_DN26_c2_g1_i22.p1;TRINITY_DN26_c2_g1~~TRINITY_DN26_c2_g1_i22.p1;ORF_type:complete_(+),score=60.28	0	+	109	1183	0	1	4537	0	No
TRINITY_DN26_c2_g1_i1	.	+	TRINITY_DN26_c2_g1_i22	0	4537	ID=TRINITY_DN26_c2_g1_i22.p4;TRINITY_DN26_c2_g1~~TRINITY_DN26_c2_g1_i22.p4;ORF_type:complete_(+),score=5.18	0	+	1246	1549	0	1	4537	0	No
TRINITY_DN26_c2_g1_i1	.	+	TRINITY_DN26_c2_g1_i22	0	4537	ID=TRINITY_DN26_c2_g1_i22.p3;TRINITY_DN26_c2_g1~~TRINITY_DN26_c2_g1_i22.p3;ORF_type:complete_(-),score=23.42	0	-	3917	4262	0	1	4537	0	No
TRINITY_DN26_c2_g1_i1	.	+	TRINITY_DN26_c2_g1_i22	0	4537	ID=TRINITY_DN26_c2_g1_i22.p2;TRINITY_DN26_c2_g1~~TRINITY_DN26_c2_g1_i22.p2;ORF_type:complete_(-),score=59.50	0	-	2346	3300	0	1	4537	0	No
TRINITY_DN26_c2_g1_i1	.	+	TRINITY_DN26_c2_g1_i12	0	4210	ID=TRINITY_DN26_c2_g1_i12.p2;TRINITY_DN26_c2_g1~~TRINITY_DN26_c2_g1_i12.p2;ORF_type:complete_(-),score=59.50	0	-	2346	3300	0	1	4210	0	No
TRINITY_DN26_c2_g1_i1	.	+	TRINITY_DN26_c2_g1_i12	0	4210	ID=TRINITY_DN26_c2_g1_i12.p1;TRINITY_DN26_c2_g1~~TRINITY_DN26_c2_g1_i12.p1;ORF_type:complete_(+),score=60.28	0	+	109	1183	0	1	4210	0	No
TRINITY_DN26_c2_g1_i1	.	+	TRINITY_DN26_c2_g1_i12	0	4210	ID=TRINITY_DN26_c2_g1_i12.p3;TRINITY_DN26_c2_g1~~TRINITY_DN26_c2_g1_i12.p3;ORF_type:complete_(-),score=23.42	0	-	3590	3935	0	1	4210	0	No
TRINITY_DN26_c2_g1_i1	.	+	TRINITY_DN26_c2_g1_i12	0	4210	ID=TRINITY_DN26_c2_g1_i12.p4;TRINITY_DN26_c2_g1~~TRINITY_DN26_c2_g1_i12.p4;ORF_type:complete_(+),score=5.18	0	+	1246	1549	0	1	4210	0	No
TRINITY_DN26_c2_g1_i1	.	+	TRINITY_DN26_c2_g1_i9	0	982	ID=TRINITY_DN26_c2_g1_i9.p1;TRINITY_DN26_c2_g1~~TRINITY_DN26_c2_g1_i9.p1;ORF_type:complete_(-),score=34.39	0	-	323	707	0	1	982	0	No
TRINITY_DN26_c2_g1_i1	.	+	TRINITY_DN4366_c0_g1_i5	0	897	ID=TRINITY_DN4366_c0_g1_i5.p1;TRINITY_DN4366_c0_g1~~TRINITY_DN4366_c0_g1_i5.p1;ORF_type:complete_(+),score=11.92	0	+	26	368	0	1	897	0	No
TRINITY_DN26_c2_g1_i1	.	+	TRINITY_DN4366_c0_g1_i4	0	1023	ID=TRINITY_DN4366_c0_g1_i4.p2;TRINITY_DN4366_c0_g1~~TRINITY_DN4366_c0_g1_i4.p2;ORF_type:3prime_partial_(-),score=21.33	0	-	2	320	0	1	1023	0	No
TRINITY_DN26_c2_g1_i1	.	+	TRINITY_DN4366_c0_g1_i3	0	805	ID=TRINITY_DN4366_c0_g1_i3.p3;TRINITY_DN4366_c0_g1~~TRINITY_DN4366_c0_g1_i3.p3;ORF_type:3prime_partial_(-),score=21.33	0	-	2	320	0	1	805	0	No
TRINITY_DN26_c2_g1_i1	.	+	TRINITY_DN4366_c0_g1_i3	0	805	ID=TRINITY_DN4366_c0_g1_i3.p1;TRINITY_DN4366_c0_g1~~TRINITY_DN4366_c0_g1_i3.p1;ORF_type:complete_(-),score=14.77	0	-	326	737	0	1	805	0	No
TRINITY_DN26_c2_g1_i1	.	+	TRINITY_DN4366_c0_g1_i2	0	679	ID=TRINITY_DN4366_c0_g1_i2.p1;TRINITY_DN4366_c0_g1~~TRINITY_DN4366_c0_g1_i2.p1;ORF_type:3prime_partial_(-),score=39.68	0	-	2	611	0	1	679	0	No
TRINITY_DN26_c2_g1_i1	.	+	TRINITY_DN26_c2_g1_i4	0	6445	ID=TRINITY_DN26_c2_g1_i4.p4;TRINITY_DN26_c2_g1~~TRINITY_DN26_c2_g1_i4.p4;ORF_type:complete_(+),score=5.18	0	+	1246	1549	0	1	6445	0	No
TRINITY_DN26_c2_g1_i1	.	+	TRINITY_DN26_c2_g1_i4	0	6445	ID=TRINITY_DN26_c2_g1_i4.p1;TRINITY_DN26_c2_g1~~TRINITY_DN26_c2_g1_i4.p1;ORF_type:complete_(+),score=60.28	0	+	109	1183	0	1	6445	0	No
TRINITY_DN26_c2_g1_i1	.	+	TRINITY_DN26_c2_g1_i4	0	6445	ID=TRINITY_DN26_c2_g1_i4.p2;TRINITY_DN26_c2_g1~~TRINITY_DN26_c2_g1_i4.p2;ORF_type:complete_(-),score=43.39	0	-	2346	3153	0	1	6445	0	No
TRINITY_DN26_c2_g1_i1	.	+	TRINITY_DN26_c2_g1_i4	0	6445	ID=TRINITY_DN26_c2_g1_i4.p3;TRINITY_DN26_c2_g1~~TRINITY_DN26_c2_g1_i4.p3;ORF_type:complete_(-),score=23.42	0	-	5825	6170	0	1	6445	0	No
TRINITY_DN26_c2_g1_i1	.	+	TRINITY_DN26_c2_g1_i19	0	6332	ID=TRINITY_DN26_c2_g1_i19.p1;TRINITY_DN26_c2_g1~~TRINITY_DN26_c2_g1_i19.p1;ORF_type:complete_(+),score=60.28	0	+	109	1183	0	1	6332	0	No
TRINITY_DN26_c2_g1_i1	.	+	TRINITY_DN26_c2_g1_i19	0	6332	ID=TRINITY_DN26_c2_g1_i19.p2;TRINITY_DN26_c2_g1~~TRINITY_DN26_c2_g1_i19.p2;ORF_type:complete_(-),score=43.39	0	-	2346	3153	0	1	6332	0	No
TRINITY_DN26_c2_g1_i1	.	+	TRINITY_DN26_c2_g1_i19	0	6332	ID=TRINITY_DN26_c2_g1_i19.p3;TRINITY_DN26_c2_g1~~TRINITY_DN26_c2_g1_i19.p3;ORF_type:complete_(-),score=35.75	0	-	5565	6057	0	1	6332	0	No
TRINITY_DN26_c2_g1_i1	.	+	TRINITY_DN26_c2_g1_i19	0	6332	ID=TRINITY_DN26_c2_g1_i19.p4;TRINITY_DN26_c2_g1~~TRINITY_DN26_c2_g1_i19.p4;ORF_type:complete_(+),score=5.18	0	+	1246	1549	0	1	6332	0	No
TRINITY_DN26_c2_g1_i14	.	+	TRINITY_DN26_c2_g1_i4	0	6445	ID=TRINITY_DN26_c2_g1_i4.p4;TRINITY_DN26_c2_g1~~TRINITY_DN26_c2_g1_i4.p4;ORF_type:complete_(+),score=5.18	0	+	1246	1549	0	1	6445	0	No
TRINITY_DN26_c2_g1_i14	.	+	TRINITY_DN26_c2_g1_i4	0	6445	ID=TRINITY_DN26_c2_g1_i4.p1;TRINITY_DN26_c2_g1~~TRINITY_DN26_c2_g1_i4.p1;ORF_type:complete_(+),score=60.28	0	+	109	1183	0	1	6445	0	No
TRINITY_DN26_c2_g1_i14	.	+	TRINITY_DN26_c2_g1_i4	0	6445	ID=TRINITY_DN26_c2_g1_i4.p2;TRINITY_DN26_c2_g1~~TRINITY_DN26_c2_g1_i4.p2;ORF_type:complete_(-),score=43.39	0	-	2346	3153	0	1	6445	0	No
TRINITY_DN26_c2_g1_i14	.	+	TRINITY_DN26_c2_g1_i4	0	6445	ID=TRINITY_DN26_c2_g1_i4.p3;TRINITY_DN26_c2_g1~~TRINITY_DN26_c2_g1_i4.p3;ORF_type:complete_(-),score=23.42	0	-	5825	6170	0	1	6445	0	No
TRINITY_DN26_c2_g1_i14	.	+	TRINITY_DN26_c2_g1_i3	0	4097	ID=TRINITY_DN26_c2_g1_i3.p1;TRINITY_DN26_c2_g1~~TRINITY_DN26_c2_g1_i3.p1;ORF_type:complete_(-),score=98.10	0	-	2346	3822	0	1	4097	0	No
TRINITY_DN26_c2_g1_i14	.	+	TRINITY_DN26_c2_g1_i3	0	4097	ID=TRINITY_DN26_c2_g1_i3.p3;TRINITY_DN26_c2_g1~~TRINITY_DN26_c2_g1_i3.p3;ORF_type:complete_(+),score=5.18	0	+	1246	1549	0	1	4097	0	No
TRINITY_DN26_c2_g1_i14	.	+	TRINITY_DN26_c2_g1_i3	0	4097	ID=TRINITY_DN26_c2_g1_i3.p2;TRINITY_DN26_c2_g1~~TRINITY_DN26_c2_g1_i3.p2;ORF_type:complete_(+),score=60.28	0	+	109	1183	0	1	4097	0	No
TRINITY_DN26_c2_g1_i14	.	+	TRINITY_DN26_c2_g1_i22	0	4537	ID=TRINITY_DN26_c2_g1_i22.p1;TRINITY_DN26_c2_g1~~TRINITY_DN26_c2_g1_i22.p1;ORF_type:complete_(+),score=60.28	0	+	109	1183	0	1	4537	0	No
TRINITY_DN26_c2_g1_i14	.	+	TRINITY_DN26_c2_g1_i22	0	4537	ID=TRINITY_DN26_c2_g1_i22.p4;TRINITY_DN26_c2_g1~~TRINITY_DN26_c2_g1_i22.p4;ORF_type:complete_(+),score=5.18	0	+	1246	1549	0	1	4537	0	No
TRINITY_DN26_c2_g1_i14	.	+	TRINITY_DN26_c2_g1_i22	0	4537	ID=TRINITY_DN26_c2_g1_i22.p3;TRINITY_DN26_c2_g1~~TRINITY_DN26_c2_g1_i22.p3;ORF_type:complete_(-),score=23.42	0	-	3917	4262	0	1	4537	0	No
TRINITY_DN26_c2_g1_i14	.	+	TRINITY_DN26_c2_g1_i22	0	4537	ID=TRINITY_DN26_c2_g1_i22.p2;TRINITY_DN26_c2_g1~~TRINITY_DN26_c2_g1_i22.p2;ORF_type:complete_(-),score=59.50	0	-	2346	3300	0	1	4537	0	No
TRINITY_DN26_c2_g1_i14	.	+	TRINITY_DN26_c2_g1_i19	0	6332	ID=TRINITY_DN26_c2_g1_i19.p1;TRINITY_DN26_c2_g1~~TRINITY_DN26_c2_g1_i19.p1;ORF_type:complete_(+),score=60.28	0	+	109	1183	0	1	6332	0	No
TRINITY_DN26_c2_g1_i14	.	+	TRINITY_DN26_c2_g1_i19	0	6332	ID=TRINITY_DN26_c2_g1_i19.p2;TRINITY_DN26_c2_g1~~TRINITY_DN26_c2_g1_i19.p2;ORF_type:complete_(-),score=43.39	0	-	2346	3153	0	1	6332	0	No
TRINITY_DN26_c2_g1_i14	.	+	TRINITY_DN26_c2_g1_i19	0	6332	ID=TRINITY_DN26_c2_g1_i19.p3;TRINITY_DN26_c2_g1~~TRINITY_DN26_c2_g1_i19.p3;ORF_type:complete_(-),score=35.75	0	-	5565	6057	0	1	6332	0	No
TRINITY_DN26_c2_g1_i14	.	+	TRINITY_DN26_c2_g1_i19	0	6332	ID=TRINITY_DN26_c2_g1_i19.p4;TRINITY_DN26_c2_g1~~TRINITY_DN26_c2_g1_i19.p4;ORF_type:complete_(+),score=5.18	0	+	1246	1549	0	1	6332	0	No
TRINITY_DN26_c2_g1_i14	.	+	TRINITY_DN26_c2_g1_i12	0	4210	ID=TRINITY_DN26_c2_g1_i12.p2;TRINITY_DN26_c2_g1~~TRINITY_DN26_c2_g1_i12.p2;ORF_type:complete_(-),score=59.50	0	-	2346	3300	0	1	4210	0	No
TRINITY_DN26_c2_g1_i14	.	+	TRINITY_DN26_c2_g1_i12	0	4210	ID=TRINITY_DN26_c2_g1_i12.p1;TRINITY_DN26_c2_g1~~TRINITY_DN26_c2_g1_i12.p1;ORF_type:complete_(+),score=60.28	0	+	109	1183	0	1	4210	0	No
TRINITY_DN26_c2_g1_i14	.	+	TRINITY_DN26_c2_g1_i12	0	4210	ID=TRINITY_DN26_c2_g1_i12.p3;TRINITY_DN26_c2_g1~~TRINITY_DN26_c2_g1_i12.p3;ORF_type:complete_(-),score=23.42	0	-	3590	3935	0	1	4210	0	No
TRINITY_DN26_c2_g1_i14	.	+	TRINITY_DN26_c2_g1_i12	0	4210	ID=TRINITY_DN26_c2_g1_i12.p4;TRINITY_DN26_c2_g1~~TRINITY_DN26_c2_g1_i12.p4;ORF_type:complete_(+),score=5.18	0	+	1246	1549	0	1	4210	0	No
TRINITY_DN26_c2_g1_i20	.	+	TRINITY_DN26_c2_g1_i4	0	6445	ID=TRINITY_DN26_c2_g1_i4.p4;TRINITY_DN26_c2_g1~~TRINITY_DN26_c2_g1_i4.p4;ORF_type:complete_(+),score=5.18	0	+	1246	1549	0	1	6445	0	No
TRINITY_DN26_c2_g1_i20	.	+	TRINITY_DN26_c2_g1_i4	0	6445	ID=TRINITY_DN26_c2_g1_i4.p1;TRINITY_DN26_c2_g1~~TRINITY_DN26_c2_g1_i4.p1;ORF_type:complete_(+),score=60.28	0	+	109	1183	0	1	6445	0	No
TRINITY_DN26_c2_g1_i20	.	+	TRINITY_DN26_c2_g1_i4	0	6445	ID=TRINITY_DN26_c2_g1_i4.p2;TRINITY_DN26_c2_g1~~TRINITY_DN26_c2_g1_i4.p2;ORF_type:complete_(-),score=43.39	0	-	2346	3153	0	1	6445	0	No
TRINITY_DN26_c2_g1_i20	.	+	TRINITY_DN26_c2_g1_i4	0	6445	ID=TRINITY_DN26_c2_g1_i4.p3;TRINITY_DN26_c2_g1~~TRINITY_DN26_c2_g1_i4.p3;ORF_type:complete_(-),score=23.42	0	-	5825	6170	0	1	6445	0	No
TRINITY_DN26_c2_g1_i20	.	+	TRINITY_DN26_c2_g1_i3	0	4097	ID=TRINITY_DN26_c2_g1_i3.p1;TRINITY_DN26_c2_g1~~TRINITY_DN26_c2_g1_i3.p1;ORF_type:complete_(-),score=98.10	0	-	2346	3822	0	1	4097	0	No
TRINITY_DN26_c2_g1_i20	.	+	TRINITY_DN26_c2_g1_i3	0	4097	ID=TRINITY_DN26_c2_g1_i3.p3;TRINITY_DN26_c2_g1~~TRINITY_DN26_c2_g1_i3.p3;ORF_type:complete_(+),score=5.18	0	+	1246	1549	0	1	4097	0	No
TRINITY_DN26_c2_g1_i20	.	+	TRINITY_DN26_c2_g1_i3	0	4097	ID=TRINITY_DN26_c2_g1_i3.p2;TRINITY_DN26_c2_g1~~TRINITY_DN26_c2_g1_i3.p2;ORF_type:complete_(+),score=60.28	0	+	109	1183	0	1	4097	0	No
TRINITY_DN26_c2_g1_i20	.	+	TRINITY_DN26_c2_g1_i22	0	4537	ID=TRINITY_DN26_c2_g1_i22.p1;TRINITY_DN26_c2_g1~~TRINITY_DN26_c2_g1_i22.p1;ORF_type:complete_(+),score=60.28	0	+	109	1183	0	1	4537	0	No
TRINITY_DN26_c2_g1_i20	.	+	TRINITY_DN26_c2_g1_i22	0	4537	ID=TRINITY_DN26_c2_g1_i22.p4;TRINITY_DN26_c2_g1~~TRINITY_DN26_c2_g1_i22.p4;ORF_type:complete_(+),score=5.18	0	+	1246	1549	0	1	4537	0	No
TRINITY_DN26_c2_g1_i20	.	+	TRINITY_DN26_c2_g1_i22	0	4537	ID=TRINITY_DN26_c2_g1_i22.p3;TRINITY_DN26_c2_g1~~TRINITY_DN26_c2_g1_i22.p3;ORF_type:complete_(-),score=23.42	0	-	3917	4262	0	1	4537	0	No
TRINITY_DN26_c2_g1_i20	.	+	TRINITY_DN26_c2_g1_i22	0	4537	ID=TRINITY_DN26_c2_g1_i22.p2;TRINITY_DN26_c2_g1~~TRINITY_DN26_c2_g1_i22.p2;ORF_type:complete_(-),score=59.50	0	-	2346	3300	0	1	4537	0	No
TRINITY_DN26_c2_g1_i20	.	+	TRINITY_DN26_c2_g1_i19	0	6332	ID=TRINITY_DN26_c2_g1_i19.p1;TRINITY_DN26_c2_g1~~TRINITY_DN26_c2_g1_i19.p1;ORF_type:complete_(+),score=60.28	0	+	109	1183	0	1	6332	0	No
TRINITY_DN26_c2_g1_i20	.	+	TRINITY_DN26_c2_g1_i19	0	6332	ID=TRINITY_DN26_c2_g1_i19.p2;TRINITY_DN26_c2_g1~~TRINITY_DN26_c2_g1_i19.p2;ORF_type:complete_(-),score=43.39	0	-	2346	3153	0	1	6332	0	No
TRINITY_DN26_c2_g1_i20	.	+	TRINITY_DN26_c2_g1_i19	0	6332	ID=TRINITY_DN26_c2_g1_i19.p3;TRINITY_DN26_c2_g1~~TRINITY_DN26_c2_g1_i19.p3;ORF_type:complete_(-),score=35.75	0	-	5565	6057	0	1	6332	0	No
TRINITY_DN26_c2_g1_i20	.	+	TRINITY_DN26_c2_g1_i19	0	6332	ID=TRINITY_DN26_c2_g1_i19.p4;TRINITY_DN26_c2_g1~~TRINITY_DN26_c2_g1_i19.p4;ORF_type:complete_(+),score=5.18	0	+	1246	1549	0	1	6332	0	No
TRINITY_DN26_c2_g1_i20	.	+	TRINITY_DN26_c2_g1_i12	0	4210	ID=TRINITY_DN26_c2_g1_i12.p2;TRINITY_DN26_c2_g1~~TRINITY_DN26_c2_g1_i12.p2;ORF_type:complete_(-),score=59.50	0	-	2346	3300	0	1	4210	0	No
TRINITY_DN26_c2_g1_i20	.	+	TRINITY_DN26_c2_g1_i12	0	4210	ID=TRINITY_DN26_c2_g1_i12.p1;TRINITY_DN26_c2_g1~~TRINITY_DN26_c2_g1_i12.p1;ORF_type:complete_(+),score=60.28	0	+	109	1183	0	1	4210	0	No
TRINITY_DN26_c2_g1_i20	.	+	TRINITY_DN26_c2_g1_i12	0	4210	ID=TRINITY_DN26_c2_g1_i12.p3;TRINITY_DN26_c2_g1~~TRINITY_DN26_c2_g1_i12.p3;ORF_type:complete_(-),score=23.42	0	-	3590	3935	0	1	4210	0	No
TRINITY_DN26_c2_g1_i20	.	+	TRINITY_DN26_c2_g1_i12	0	4210	ID=TRINITY_DN26_c2_g1_i12.p4;TRINITY_DN26_c2_g1~~TRINITY_DN26_c2_g1_i12.p4;ORF_type:complete_(+),score=5.18	0	+	1246	1549	0	1	4210	0	No
TRINITY_DN0_c0_g1_i1	.	+	TRINITY_DN0_c0_g3_i4	0	8543	ID=TRINITY_DN0_c0_g3_i4.p2;TRINITY_DN0_c0_g3~~TRINITY_DN0_c0_g3_i4.p2;ORF_type:complete_(+),score=6.53	0	+	550	1807	0	1	8543	0	No
TRINITY_DN0_c0_g1_i1	.	+	TRINITY_DN0_c0_g3_i4	0	8543	ID=TRINITY_DN0_c0_g3_i4.p3;TRINITY_DN0_c0_g3~~TRINITY_DN0_c0_g3_i4.p3;ORF_type:complete_(+),score=8.32	0	+	7298	8042	0	1	8543	0	No
TRINITY_DN0_c0_g1_i1	.	+	TRINITY_DN0_c0_g3_i4	0	8543	ID=TRINITY_DN0_c0_g3_i4.p4;TRINITY_DN0_c0_g3~~TRINITY_DN0_c0_g3_i4.p4;ORF_type:complete_(+),score=3.64	0	+	6354	7065	0	1	8543	0	No
TRINITY_DN0_c0_g1_i1	.	+	TRINITY_DN0_c0_g3_i4	0	8543	ID=TRINITY_DN0_c0_g3_i4.p1;TRINITY_DN0_c0_g3~~TRINITY_DN0_c0_g3_i4.p1;ORF_type:complete_(+),score=39.87	0	+	1952	6131	0	1	8543	0	No
TRINITY_DN0_c0_g1_i1	.	+	TRINITY_DN0_c0_g3_i3	0	5716	ID=TRINITY_DN0_c0_g3_i3.p2;TRINITY_DN0_c0_g3~~TRINITY_DN0_c0_g3_i3.p2;ORF_type:complete_(+),score=8.32	0	+	4471	5215	0	1	5716	0	No
TRINITY_DN0_c0_g1_i1	.	+	TRINITY_DN0_c0_g3_i3	0	5716	ID=TRINITY_DN0_c0_g3_i3.p1;TRINITY_DN0_c0_g3~~TRINITY_DN0_c0_g3_i3.p1;ORF_type:complete_(+),score=17.25	0	+	478	3304	0	1	5716	0	No
TRINITY_DN0_c0_g1_i1	.	+	TRINITY_DN0_c0_g3_i3	0	5716	ID=TRINITY_DN0_c0_g3_i3.p3;TRINITY_DN0_c0_g3~~TRINITY_DN0_c0_g3_i3.p3;ORF_type:complete_(+),score=3.64	0	+	3527	4238	0	1	5716	0	No
TRINITY_DN0_c0_g1_i1	.	+	TRINITY_DN0_c0_g3_i2	0	5220	ID=TRINITY_DN0_c0_g3_i2.p1;TRINITY_DN0_c0_g3~~TRINITY_DN0_c0_g3_i2.p1;ORF_type:5prime_partial_(+),score=22.47	0	+	0	2808	0	1	5220	0	No
TRINITY_DN0_c0_g1_i1	.	+	TRINITY_DN0_c0_g3_i2	0	5220	ID=TRINITY_DN0_c0_g3_i2.p3;TRINITY_DN0_c0_g3~~TRINITY_DN0_c0_g3_i2.p3;ORF_type:complete_(+),score=3.64	0	+	3031	3742	0	1	5220	0	No
TRINITY_DN0_c0_g1_i1	.	+	TRINITY_DN0_c0_g3_i2	0	5220	ID=TRINITY_DN0_c0_g3_i2.p2;TRINITY_DN0_c0_g3~~TRINITY_DN0_c0_g3_i2.p2;ORF_type:complete_(+),score=8.32	0	+	3975	4719	0	1	5220	0	No
TRINITY_DN0_c1_g1_i1	.	+	TRINITY_DN0_c1_g1_i13	0	682	ID=TRINITY_DN0_c1_g1_i13.p1;TRINITY_DN0_c1_g1~~TRINITY_DN0_c1_g1_i13.p1;ORF_type:5prime_partial_(+),score=1.27	0	+	2	359	0	1	682	0	No
TRINITY_DN0_c1_g1_i1	.	+	TRINITY_DN0_c1_g1_i13	0	682	ID=TRINITY_DN0_c1_g1_i13.p1;TRINITY_DN0_c1_g1~~TRINITY_DN0_c1_g1_i13.p1;ORF_type:5prime_partial_(+),score=1.27	0	+	2	359	0	1	682	0	No
TRINITY_DN0_c1_g1_i1	.	+	TRINITY_DN0_c1_g1_i13	0	682	ID=TRINITY_DN0_c1_g1_i13.p1;TRINITY_DN0_c1_g1~~TRINITY_DN0_c1_g1_i13.p1;ORF_type:5prime_partial_(+),score=1.27	0	+	2	359	0	1	682	0	No
TRINITY_DN0_c1_g1_i1	.	+	TRINITY_DN0_c1_g1_i13	0	682	ID=TRINITY_DN0_c1_g1_i13.p1;TRINITY_DN0_c1_g1~~TRINITY_DN0_c1_g1_i13.p1;ORF_type:5prime_partial_(+),score=1.27	0	+	2	359	0	1	682	0	No
TRINITY_DN0_c1_g1_i1	.	+	TRINITY_DN4232_c1_g1_i6	0	436	ID=TRINITY_DN4232_c1_g1_i6.p1;TRINITY_DN4232_c1_g1~~TRINITY_DN4232_c1_g1_i6.p1;ORF_type:5prime_partial_(+),score=5.34	0	+	2	302	0	1	436	0	No
TRINITY_DN0_c1_g1_i1	.	+	TRINITY_DN4232_c1_g1_i6	0	436	ID=TRINITY_DN4232_c1_g1_i6.p1;TRINITY_DN4232_c1_g1~~TRINITY_DN4232_c1_g1_i6.p1;ORF_type:5prime_partial_(+),score=5.34	0	+	2	302	0	1	436	0	No
TRINITY_DN0_c1_g1_i1	.	-	TRINITY_DN6246_c0_g2_i1	0	507	ID=TRINITY_DN6246_c0_g2_i1.p1;TRINITY_DN6246_c0_g2~~TRINITY_DN6246_c0_g2_i1.p1;ORF_type:complete_(+),score=0.78	0	+	123	471	0	1	507	0	No
TRINITY_DN0_c1_g1_i1	.	-	TRINITY_DN6246_c0_g2_i1	0	507	ID=TRINITY_DN6246_c0_g2_i1.p1;TRINITY_DN6246_c0_g2~~TRINITY_DN6246_c0_g2_i1.p1;ORF_type:complete_(+),score=0.78	0	+	123	471	0	1	507	0	No
TRINITY_DN0_c1_g1_i1	.	+	TRINITY_DN6000_c0_g1_i26	0	2521	ID=TRINITY_DN6000_c0_g1_i26.p1;TRINITY_DN6000_c0_g1~~TRINITY_DN6000_c0_g1_i26.p1;ORF_type:complete_(-),score=65.57	0	-	429	1629	0	1	2521	0	No
TRINITY_DN0_c1_g1_i1	.	+	TRINITY_DN6000_c0_g1_i26	0	2521	ID=TRINITY_DN6000_c0_g1_i26.p1;TRINITY_DN6000_c0_g1~~TRINITY_DN6000_c0_g1_i26.p1;ORF_type:complete_(-),score=65.57	0	-	429	1629	0	1	2521	0	No
TRINITY_DN0_c1_g1_i1	.	+	TRINITY_DN6000_c0_g1_i23	0	2775	ID=TRINITY_DN6000_c0_g1_i23.p1;TRINITY_DN6000_c0_g1~~TRINITY_DN6000_c0_g1_i23.p1;ORF_type:complete_(-),score=49.26	0	-	429	1158	0	1	2775	0	No
TRINITY_DN0_c1_g1_i1	.	+	TRINITY_DN6000_c0_g1_i23	0	2775	ID=TRINITY_DN6000_c0_g1_i23.p1;TRINITY_DN6000_c0_g1~~TRINITY_DN6000_c0_g1_i23.p1;ORF_type:complete_(-),score=49.26	0	-	429	1158	0	1	2775	0	No
TRINITY_DN0_c1_g1_i1	.	+	TRINITY_DN3898_c2_g1_i1	0	2438	ID=TRINITY_DN3898_c2_g1_i1.p3;TRINITY_DN3898_c2_g1~~TRINITY_DN3898_c2_g1_i1.p3;ORF_type:complete_(-),score=22.61	0	-	1832	2195	0	1	2438	0	No
TRINITY_DN0_c1_g1_i1	.	+	TRINITY_DN3898_c2_g1_i1	0	2438	ID=TRINITY_DN3898_c2_g1_i1.p1;TRINITY_DN3898_c2_g1~~TRINITY_DN3898_c2_g1_i1.p1;ORF_type:5prime_partial_(+),score=28.75	0	+	1	676	0	1	2438	0	No
TRINITY_DN0_c1_g1_i1	.	+	TRINITY_DN3898_c2_g1_i1	0	2438	ID=TRINITY_DN3898_c2_g1_i1.p2;TRINITY_DN3898_c2_g1~~TRINITY_DN3898_c2_g1_i1.p2;ORF_type:complete_(+),score=28.03	0	+	927	1440	0	1	2438	0	No
TRINITY_DN0_c1_g1_i1	.	+	TRINITY_DN3898_c2_g1_i1	0	2438	ID=TRINITY_DN3898_c2_g1_i1.p3;TRINITY_DN3898_c2_g1~~TRINITY_DN3898_c2_g1_i1.p3;ORF_type:complete_(-),score=22.61	0	-	1832	2195	0	1	2438	0	No
TRINITY_DN0_c1_g1_i1	.	+	TRINITY_DN3898_c2_g1_i1	0	2438	ID=TRINITY_DN3898_c2_g1_i1.p1;TRINITY_DN3898_c2_g1~~TRINITY_DN3898_c2_g1_i1.p1;ORF_type:5prime_partial_(+),score=28.75	0	+	1	676	0	1	2438	0	No
TRINITY_DN0_c1_g1_i1	.	+	TRINITY_DN3898_c2_g1_i1	0	2438	ID=TRINITY_DN3898_c2_g1_i1.p2;TRINITY_DN3898_c2_g1~~TRINITY_DN3898_c2_g1_i1.p2;ORF_type:complete_(+),score=28.03	0	+	927	1440	0	1	2438	0	No
TRINITY_DN0_c1_g1_i1	.	-	TRINITY_DN13854_c0_g1_i2	0	4805	ID=TRINITY_DN13854_c0_g1_i2.p1;TRINITY_DN13854_c0_g1~~TRINITY_DN13854_c0_g1_i2.p1;ORF_type:complete_(+),score=226.97	0	+	402	3168	0	1	4805	0	No
TRINITY_DN0_c1_g1_i1	.	-	TRINITY_DN13854_c0_g1_i2	0	4805	ID=TRINITY_DN13854_c0_g1_i2.p2;TRINITY_DN13854_c0_g1~~TRINITY_DN13854_c0_g1_i2.p2;ORF_type:complete_(+),score=11.10	0	+	3880	4399	0	1	4805	0	No
TRINITY_DN0_c1_g1_i1	.	-	TRINITY_DN13854_c0_g1_i2	0	4805	ID=TRINITY_DN13854_c0_g1_i2.p1;TRINITY_DN13854_c0_g1~~TRINITY_DN13854_c0_g1_i2.p1;ORF_type:complete_(+),score=226.97	0	+	402	3168	0	1	4805	0	No
TRINITY_DN0_c1_g1_i1	.	-	TRINITY_DN13854_c0_g1_i2	0	4805	ID=TRINITY_DN13854_c0_g1_i2.p2;TRINITY_DN13854_c0_g1~~TRINITY_DN13854_c0_g1_i2.p2;ORF_type:complete_(+),score=11.10	0	+	3880	4399	0	1	4805	0	No
TRINITY_DN0_c1_g1_i1	.	-	TRINITY_DN13854_c0_g1_i11	0	4646	ID=TRINITY_DN13854_c0_g1_i11.p1;TRINITY_DN13854_c0_g1~~TRINITY_DN13854_c0_g1_i11.p1;ORF_type:complete_(+),score=216.40	0	+	402	3009	0	1	4646	0	No
TRINITY_DN0_c1_g1_i1	.	-	TRINITY_DN13854_c0_g1_i11	0	4646	ID=TRINITY_DN13854_c0_g1_i11.p2;TRINITY_DN13854_c0_g1~~TRINITY_DN13854_c0_g1_i11.p2;ORF_type:complete_(+),score=11.10	0	+	3721	4240	0	1	4646	0	No
TRINITY_DN0_c1_g1_i1	.	-	TRINITY_DN13854_c0_g1_i11	0	4646	ID=TRINITY_DN13854_c0_g1_i11.p1;TRINITY_DN13854_c0_g1~~TRINITY_DN13854_c0_g1_i11.p1;ORF_type:complete_(+),score=216.40	0	+	402	3009	0	1	4646	0	No
TRINITY_DN0_c1_g1_i1	.	-	TRINITY_DN13854_c0_g1_i11	0	4646	ID=TRINITY_DN13854_c0_g1_i11.p2;TRINITY_DN13854_c0_g1~~TRINITY_DN13854_c0_g1_i11.p2;ORF_type:complete_(+),score=11.10	0	+	3721	4240	0	1	4646	0	No
TRINITY_DN0_c1_g1_i1	.	+	TRINITY_DN18110_c1_g1_i1	0	923	ID=TRINITY_DN18110_c1_g1_i1.p1;TRINITY_DN18110_c1_g1~~TRINITY_DN18110_c1_g1_i1.p1;ORF_type:5prime_partial_(+),score=29.76	0	+	1	517	0	1	923	0	No
TRINITY_DN0_c1_g1_i1	.	+	TRINITY_DN18110_c1_g1_i1	0	923	ID=TRINITY_DN18110_c1_g1_i1.p1;TRINITY_DN18110_c1_g1~~TRINITY_DN18110_c1_g1_i1.p1;ORF_type:5prime_partial_(+),score=29.76	0	+	1	517	0	1	923	0	No
TRINITY_DN0_c1_g1_i1	.	-	TRINITY_DN3177_c0_g1_i60	0	3294	ID=TRINITY_DN3177_c0_g1_i60.p1;TRINITY_DN3177_c0_g1~~TRINITY_DN3177_c0_g1_i60.p1;ORF_type:complete_(+),score=44.56	0	+	1529	2408	0	1	3294	0	No
TRINITY_DN0_c1_g1_i1	.	-	TRINITY_DN3177_c0_g1_i60	0	3294	ID=TRINITY_DN3177_c0_g1_i60.p1;TRINITY_DN3177_c0_g1~~TRINITY_DN3177_c0_g1_i60.p1;ORF_type:complete_(+),score=44.56	0	+	1529	2408	0	1	3294	0	No
TRINITY_DN0_c1_g1_i1	.	-	TRINITY_DN3177_c0_g1_i56	0	3224	ID=TRINITY_DN3177_c0_g1_i56.p1;TRINITY_DN3177_c0_g1~~TRINITY_DN3177_c0_g1_i56.p1;ORF_type:complete_(+),score=44.56	0	+	1459	2338	0	1	3224	0	No
TRINITY_DN0_c1_g1_i1	.	-	TRINITY_DN3177_c0_g1_i56	0	3224	ID=TRINITY_DN3177_c0_g1_i56.p1;TRINITY_DN3177_c0_g1~~TRINITY_DN3177_c0_g1_i56.p1;ORF_type:complete_(+),score=44.56	0	+	1459	2338	0	1	3224	0	No
TRINITY_DN0_c1_g1_i1	.	-	TRINITY_DN3177_c0_g1_i43	0	3502	ID=TRINITY_DN3177_c0_g1_i43.p1;TRINITY_DN3177_c0_g1~~TRINITY_DN3177_c0_g1_i43.p1;ORF_type:complete_(+),score=44.56	0	+	1737	2616	0	1	3502	0	No
TRINITY_DN0_c1_g1_i1	.	-	TRINITY_DN3177_c0_g1_i43	0	3502	ID=TRINITY_DN3177_c0_g1_i43.p1;TRINITY_DN3177_c0_g1~~TRINITY_DN3177_c0_g1_i43.p1;ORF_type:complete_(+),score=44.56	0	+	1737	2616	0	1	3502	0	No
TRINITY_DN0_c1_g1_i1	.	-	TRINITY_DN3177_c0_g1_i30	0	3371	ID=TRINITY_DN3177_c0_g1_i30.p1;TRINITY_DN3177_c0_g1~~TRINITY_DN3177_c0_g1_i30.p1;ORF_type:complete_(+),score=44.56	0	+	1606	2485	0	1	3371	0	No
TRINITY_DN0_c1_g1_i1	.	-	TRINITY_DN3177_c0_g1_i30	0	3371	ID=TRINITY_DN3177_c0_g1_i30.p1;TRINITY_DN3177_c0_g1~~TRINITY_DN3177_c0_g1_i30.p1;ORF_type:complete_(+),score=44.56	0	+	1606	2485	0	1	3371	0	No
TRINITY_DN0_c1_g1_i1	.	-	TRINITY_DN824_c0_g2_i2	0	1043	ID=TRINITY_DN824_c0_g2_i2.p1;TRINITY_DN824_c0_g2~~TRINITY_DN824_c0_g2_i2.p1;ORF_type:complete_(-),score=41.59	0	-	245	965	0	1	1043	0	No
TRINITY_DN0_c1_g1_i1	.	-	TRINITY_DN824_c0_g2_i2	0	1043	ID=TRINITY_DN824_c0_g2_i2.p1;TRINITY_DN824_c0_g2~~TRINITY_DN824_c0_g2_i2.p1;ORF_type:complete_(-),score=41.59	0	-	245	965	0	1	1043	0	No
TRINITY_DN0_c1_g1_i1	.	+	TRINITY_DN824_c0_g2_i2	0	1043	ID=TRINITY_DN824_c0_g2_i2.p1;TRINITY_DN824_c0_g2~~TRINITY_DN824_c0_g2_i2.p1;ORF_type:complete_(-),score=41.59	0	-	245	965	0	1	1043	0	No
TRINITY_DN0_c1_g1_i1	.	-	TRINITY_DN824_c0_g2_i10	0	1204	ID=TRINITY_DN824_c0_g2_i10.p1;TRINITY_DN824_c0_g2~~TRINITY_DN824_c0_g2_i10.p1;ORF_type:complete_(-),score=41.59	0	-	406	1126	0	1	1204	0	No
TRINITY_DN0_c1_g1_i1	.	-	TRINITY_DN824_c0_g2_i10	0	1204	ID=TRINITY_DN824_c0_g2_i10.p1;TRINITY_DN824_c0_g2~~TRINITY_DN824_c0_g2_i10.p1;ORF_type:complete_(-),score=41.59	0	-	406	1126	0	1	1204	0	No
TRINITY_DN0_c1_g1_i1	.	+	TRINITY_DN824_c0_g2_i10	0	1204	ID=TRINITY_DN824_c0_g2_i10.p1;TRINITY_DN824_c0_g2~~TRINITY_DN824_c0_g2_i10.p1;ORF_type:complete_(-),score=41.59	0	-	406	1126	0	1	1204	0	No
TRINITY_DN0_c1_g1_i1	.	-	TRINITY_DN9870_c0_g1_i2	0	2558	ID=TRINITY_DN9870_c0_g1_i2.p1;TRINITY_DN9870_c0_g1~~TRINITY_DN9870_c0_g1_i2.p1;ORF_type:complete_(+),score=40.59	0	+	1747	2287	0	1	2558	0	No
TRINITY_DN0_c1_g1_i1	.	-	TRINITY_DN9870_c0_g1_i2	0	2558	ID=TRINITY_DN9870_c0_g1_i2.p1;TRINITY_DN9870_c0_g1~~TRINITY_DN9870_c0_g1_i2.p1;ORF_type:complete_(+),score=40.59	0	+	1747	2287	0	1	2558	0	No
TRINITY_DN0_c1_g1_i1	.	-	TRINITY_DN12941_c0_g1_i4	0	660	ID=TRINITY_DN12941_c0_g1_i4.p1;TRINITY_DN12941_c0_g1~~TRINITY_DN12941_c0_g1_i4.p1;ORF_type:complete_(+),score=9.14	0	+	170	626	0	1	660	0	No
TRINITY_DN0_c1_g1_i1	.	-	TRINITY_DN12941_c0_g1_i4	0	660	ID=TRINITY_DN12941_c0_g1_i4.p1;TRINITY_DN12941_c0_g1~~TRINITY_DN12941_c0_g1_i4.p1;ORF_type:complete_(+),score=9.14	0	+	170	626	0	1	660	0	No
TRINITY_DN0_c1_g1_i1	.	-	TRINITY_DN93263_c0_g1_i1	0	959	ID=TRINITY_DN93263_c0_g1_i1.p1;TRINITY_DN93263_c0_g1~~TRINITY_DN93263_c0_g1_i1.p1;ORF_type:5prime_partial_(-),score=0.33	0	-	655	958	0	1	959	0	No
TRINITY_DN0_c1_g1_i1	.	-	TRINITY_DN93263_c0_g1_i1	0	959	ID=TRINITY_DN93263_c0_g1_i1.p1;TRINITY_DN93263_c0_g1~~TRINITY_DN93263_c0_g1_i1.p1;ORF_type:5prime_partial_(-),score=0.33	0	-	655	958	0	1	959	0	No
TRINITY_DN0_c1_g1_i1	.	-	TRINITY_DN9422_c1_g1_i9	0	1528	ID=TRINITY_DN9422_c1_g1_i9.p1;TRINITY_DN9422_c1_g1~~TRINITY_DN9422_c1_g1_i9.p1;ORF_type:complete_(-),score=58.09	0	-	401	1241	0	1	1528	0	No
TRINITY_DN0_c1_g1_i1	.	+	TRINITY_DN6579_c0_g1_i5	0	1847	ID=TRINITY_DN6579_c0_g1_i5.p1;TRINITY_DN6579_c0_g1~~TRINITY_DN6579_c0_g1_i5.p1;ORF_type:complete_(+),score=64.00	0	+	179	1124	0	1	1847	0	No
TRINITY_DN0_c1_g1_i1	.	+	TRINITY_DN6579_c0_g1_i5	0	1847	ID=TRINITY_DN6579_c0_g1_i5.p1;TRINITY_DN6579_c0_g1~~TRINITY_DN6579_c0_g1_i5.p1;ORF_type:complete_(+),score=64.00	0	+	179	1124	0	1	1847	0	No
TRINITY_DN0_c1_g1_i1	.	+	TRINITY_DN10657_c0_g1_i11	0	2757	ID=TRINITY_DN10657_c0_g1_i11.p1;TRINITY_DN10657_c0_g1~~TRINITY_DN10657_c0_g1_i11.p1;ORF_type:complete_(+),score=2.29	0	+	775	1201	0	1	2757	0	No
TRINITY_DN0_c1_g1_i1	.	+	TRINITY_DN10657_c0_g1_i11	0	2757	ID=TRINITY_DN10657_c0_g1_i11.p1;TRINITY_DN10657_c0_g1~~TRINITY_DN10657_c0_g1_i11.p1;ORF_type:complete_(+),score=2.29	0	+	775	1201	0	1	2757	0	No
TRINITY_DN0_c1_g1_i1	.	+	TRINITY_DN10038_c0_g1_i8	0	1294	ID=TRINITY_DN10038_c0_g1_i8.p1;TRINITY_DN10038_c0_g1~~TRINITY_DN10038_c0_g1_i8.p1;ORF_type:complete_(+),score=7.86	0	+	332	785	0	1	1294	0	No
TRINITY_DN0_c1_g1_i1	.	+	TRINITY_DN10038_c0_g1_i8	0	1294	ID=TRINITY_DN10038_c0_g1_i8.p1;TRINITY_DN10038_c0_g1~~TRINITY_DN10038_c0_g1_i8.p1;ORF_type:complete_(+),score=7.86	0	+	332	785	0	1	1294	0	No
TRINITY_DN0_c1_g1_i1	.	-	TRINITY_DN17109_c0_g1_i1	0	897	ID=TRINITY_DN17109_c0_g1_i1.p1;TRINITY_DN17109_c0_g1~~TRINITY_DN17109_c0_g1_i1.p1;ORF_type:complete_(+),score=16.31	0	+	207	552	0	1	897	0	No
TRINITY_DN0_c1_g1_i1	.	-	TRINITY_DN17109_c0_g1_i1	0	897	ID=TRINITY_DN17109_c0_g1_i1.p1;TRINITY_DN17109_c0_g1~~TRINITY_DN17109_c0_g1_i1.p1;ORF_type:complete_(+),score=16.31	0	+	207	552	0	1	897	0	No
TRINITY_DN0_c1_g1_i1	.	+	TRINITY_DN2720_c0_g1_i59	0	2417	ID=TRINITY_DN2720_c0_g1_i59.p1;TRINITY_DN2720_c0_g1~~TRINITY_DN2720_c0_g1_i59.p1;ORF_type:complete_(+),score=63.29	0	+	279	1908	0	1	2417	0	No
TRINITY_DN0_c1_g1_i1	.	+	TRINITY_DN2720_c0_g1_i59	0	2417	ID=TRINITY_DN2720_c0_g1_i59.p1;TRINITY_DN2720_c0_g1~~TRINITY_DN2720_c0_g1_i59.p1;ORF_type:complete_(+),score=63.29	0	+	279	1908	0	1	2417	0	No
TRINITY_DN0_c1_g1_i1	.	+	TRINITY_DN5630_c0_g1_i95	0	3638	ID=TRINITY_DN5630_c0_g1_i95.p1;TRINITY_DN5630_c0_g1~~TRINITY_DN5630_c0_g1_i95.p1;ORF_type:complete_(+),score=186.04	0	+	240	2793	0	1	3638	0	No
TRINITY_DN0_c1_g1_i1	.	+	TRINITY_DN5630_c0_g1_i95	0	3638	ID=TRINITY_DN5630_c0_g1_i95.p1;TRINITY_DN5630_c0_g1~~TRINITY_DN5630_c0_g1_i95.p1;ORF_type:complete_(+),score=186.04	0	+	240	2793	0	1	3638	0	No
TRINITY_DN0_c1_g1_i1	.	+	TRINITY_DN5630_c0_g1_i59	0	4168	ID=TRINITY_DN5630_c0_g1_i59.p1;TRINITY_DN5630_c0_g1~~TRINITY_DN5630_c0_g1_i59.p1;ORF_type:complete_(+),score=113.91	0	+	240	1833	0	1	4168	0	No
TRINITY_DN0_c1_g1_i1	.	+	TRINITY_DN5630_c0_g1_i59	0	4168	ID=TRINITY_DN5630_c0_g1_i59.p2;TRINITY_DN5630_c0_g1~~TRINITY_DN5630_c0_g1_i59.p2;ORF_type:complete_(+),score=62.59	0	+	2480	3323	0	1	4168	0	No
TRINITY_DN0_c1_g1_i1	.	+	TRINITY_DN5630_c0_g1_i59	0	4168	ID=TRINITY_DN5630_c0_g1_i59.p1;TRINITY_DN5630_c0_g1~~TRINITY_DN5630_c0_g1_i59.p1;ORF_type:complete_(+),score=113.91	0	+	240	1833	0	1	4168	0	No
TRINITY_DN0_c1_g1_i1	.	+	TRINITY_DN5630_c0_g1_i59	0	4168	ID=TRINITY_DN5630_c0_g1_i59.p2;TRINITY_DN5630_c0_g1~~TRINITY_DN5630_c0_g1_i59.p2;ORF_type:complete_(+),score=62.59	0	+	2480	3323	0	1	4168	0	No
TRINITY_DN0_c1_g1_i1	.	+	TRINITY_DN130348_c0_g1_i1	0	332	ID=TRINITY_DN130348_c0_g1_i1.p1;TRINITY_DN130348_c0_g1~~TRINITY_DN130348_c0_g1_i1.p1;ORF_type:internal_(-),score=11.20	0	-	2	332	0	1	332	0	No
TRINITY_DN0_c1_g1_i1	.	+	TRINITY_DN130348_c0_g1_i1	0	332	ID=TRINITY_DN130348_c0_g1_i1.p1;TRINITY_DN130348_c0_g1~~TRINITY_DN130348_c0_g1_i1.p1;ORF_type:internal_(-),score=11.20	0	-	2	332	0	1	332	0	No
TRINITY_DN0_c1_g1_i1	.	+	TRINITY_DN6935_c0_g1_i2	0	1393	ID=TRINITY_DN6935_c0_g1_i2.p1;TRINITY_DN6935_c0_g1~~TRINITY_DN6935_c0_g1_i2.p1;ORF_type:complete_(-),score=20.47	0	-	968	1310	0	1	1393	0	No
TRINITY_DN0_c1_g1_i1	.	+	TRINITY_DN6935_c0_g1_i2	0	1393	ID=TRINITY_DN6935_c0_g1_i2.p1;TRINITY_DN6935_c0_g1~~TRINITY_DN6935_c0_g1_i2.p1;ORF_type:complete_(-),score=20.47	0	-	968	1310	0	1	1393	0	No
TRINITY_DN0_c1_g1_i1	.	+	TRINITY_DN5574_c0_g1_i4	0	2291	ID=TRINITY_DN5574_c0_g1_i4.p1;TRINITY_DN5574_c0_g1~~TRINITY_DN5574_c0_g1_i4.p1;ORF_type:complete_(-),score=23.72	0	-	1086	1638	0	1	2291	0	No
TRINITY_DN0_c1_g1_i1	.	+	TRINITY_DN5574_c0_g1_i4	0	2291	ID=TRINITY_DN5574_c0_g1_i4.p1;TRINITY_DN5574_c0_g1~~TRINITY_DN5574_c0_g1_i4.p1;ORF_type:complete_(-),score=23.72	0	-	1086	1638	0	1	2291	0	No
TRINITY_DN0_c1_g1_i1	.	+	TRINITY_DN21438_c0_g1_i1	0	691	ID=TRINITY_DN21438_c0_g1_i1.p1;TRINITY_DN21438_c0_g1~~TRINITY_DN21438_c0_g1_i1.p1;ORF_type:3prime_partial_(-),score=24.50	0	-	0	372	0	1	691	0	No
TRINITY_DN0_c1_g1_i1	.	+	TRINITY_DN18177_c0_g2_i1	0	1211	ID=TRINITY_DN18177_c0_g2_i1.p1;TRINITY_DN18177_c0_g2~~TRINITY_DN18177_c0_g2_i1.p1;ORF_type:complete_(+),score=10.47	0	+	408	723	0	1	1211	0	No
TRINITY_DN0_c1_g1_i1	.	+	TRINITY_DN18177_c0_g2_i1	0	1211	ID=TRINITY_DN18177_c0_g2_i1.p1;TRINITY_DN18177_c0_g2~~TRINITY_DN18177_c0_g2_i1.p1;ORF_type:complete_(+),score=10.47	0	+	408	723	0	1	1211	0	No
TRINITY_DN0_c1_g1_i1	.	+	TRINITY_DN13652_c0_g1_i4	0	2014	ID=TRINITY_DN13652_c0_g1_i4.p1;TRINITY_DN13652_c0_g1~~TRINITY_DN13652_c0_g1_i4.p1;ORF_type:complete_(+),score=70.74	0	+	61	1288	0	1	2014	0	No
TRINITY_DN0_c1_g1_i1	.	+	TRINITY_DN13652_c0_g1_i4	0	2014	ID=TRINITY_DN13652_c0_g1_i4.p1;TRINITY_DN13652_c0_g1~~TRINITY_DN13652_c0_g1_i4.p1;ORF_type:complete_(+),score=70.74	0	+	61	1288	0	1	2014	0	No
TRINITY_DN0_c1_g1_i1	.	+	TRINITY_DN13652_c0_g1_i3	0	2164	ID=TRINITY_DN13652_c0_g1_i3.p1;TRINITY_DN13652_c0_g1~~TRINITY_DN13652_c0_g1_i3.p1;ORF_type:complete_(+),score=61.88	0	+	61	1207	0	1	2164	0	No
TRINITY_DN0_c1_g1_i1	.	+	TRINITY_DN13652_c0_g1_i3	0	2164	ID=TRINITY_DN13652_c0_g1_i3.p1;TRINITY_DN13652_c0_g1~~TRINITY_DN13652_c0_g1_i3.p1;ORF_type:complete_(+),score=61.88	0	+	61	1207	0	1	2164	0	No
TRINITY_DN0_c1_g1_i1	.	+	TRINITY_DN13652_c0_g1_i1	0	3196	ID=TRINITY_DN13652_c0_g1_i1.p2;TRINITY_DN13652_c0_g1~~TRINITY_DN13652_c0_g1_i1.p2;ORF_type:complete_(+),score=31.65	0	+	2107	2470	0	1	3196	0	No
TRINITY_DN0_c1_g1_i1	.	+	TRINITY_DN13652_c0_g1_i1	0	3196	ID=TRINITY_DN13652_c0_g1_i1.p1;TRINITY_DN13652_c0_g1~~TRINITY_DN13652_c0_g1_i1.p1;ORF_type:complete_(+),score=26.82	0	+	61	793	0	1	3196	0	No
TRINITY_DN0_c1_g1_i1	.	+	TRINITY_DN13652_c0_g1_i1	0	3196	ID=TRINITY_DN13652_c0_g1_i1.p2;TRINITY_DN13652_c0_g1~~TRINITY_DN13652_c0_g1_i1.p2;ORF_type:complete_(+),score=31.65	0	+	2107	2470	0	1	3196	0	No
TRINITY_DN0_c1_g1_i1	.	+	TRINITY_DN13652_c0_g1_i1	0	3196	ID=TRINITY_DN13652_c0_g1_i1.p1;TRINITY_DN13652_c0_g1~~TRINITY_DN13652_c0_g1_i1.p1;ORF_type:complete_(+),score=26.82	0	+	61	793	0	1	3196	0	No
TRINITY_DN0_c1_g1_i1	.	+	TRINITY_DN1365_c0_g1_i1	0	1803	ID=TRINITY_DN1365_c0_g1_i1.p1;TRINITY_DN1365_c0_g1~~TRINITY_DN1365_c0_g1_i1.p1;ORF_type:complete_(-),score=2.59	0	-	1267	1663	0	1	1803	0	No
TRINITY_DN0_c1_g1_i1	.	+	TRINITY_DN1365_c0_g1_i1	0	1803	ID=TRINITY_DN1365_c0_g1_i1.p1;TRINITY_DN1365_c0_g1~~TRINITY_DN1365_c0_g1_i1.p1;ORF_type:complete_(-),score=2.59	0	-	1267	1663	0	1	1803	0	No
TRINITY_DN0_c1_g1_i1	.	-	TRINITY_DN16221_c0_g1_i2	0	4121	ID=TRINITY_DN16221_c0_g1_i2.p1;TRINITY_DN16221_c0_g1~~TRINITY_DN16221_c0_g1_i2.p1;ORF_type:complete_(-),score=173.90	0	-	1122	3759	0	1	4121	0	No
TRINITY_DN0_c1_g1_i1	.	-	TRINITY_DN16221_c0_g1_i2	0	4121	ID=TRINITY_DN16221_c0_g1_i2.p1;TRINITY_DN16221_c0_g1~~TRINITY_DN16221_c0_g1_i2.p1;ORF_type:complete_(-),score=173.90	0	-	1122	3759	0	1	4121	0	No
TRINITY_DN0_c1_g1_i1	.	-	TRINITY_DN9856_c0_g1_i1	0	299	ID=TRINITY_DN9856_c0_g1_i1.p1;TRINITY_DN9856_c0_g1~~TRINITY_DN9856_c0_g1_i1.p1;ORF_type:internal_(-),score=15.45	0	-	1	298	0	1	299	0	No
TRINITY_DN0_c1_g1_i1	.	-	TRINITY_DN9856_c0_g1_i1	0	299	ID=TRINITY_DN9856_c0_g1_i1.p1;TRINITY_DN9856_c0_g1~~TRINITY_DN9856_c0_g1_i1.p1;ORF_type:internal_(-),score=15.45	0	-	1	298	0	1	299	0	No
TRINITY_DN0_c1_g1_i1	.	+	TRINITY_DN3022_c0_g1_i13	0	3181	ID=TRINITY_DN3022_c0_g1_i13.p2;TRINITY_DN3022_c0_g1~~TRINITY_DN3022_c0_g1_i13.p2;ORF_type:complete_(-),score=30.96	0	-	1293	1860	0	1	3181	0	No
TRINITY_DN0_c1_g1_i1	.	+	TRINITY_DN3022_c0_g1_i13	0	3181	ID=TRINITY_DN3022_c0_g1_i13.p1;TRINITY_DN3022_c0_g1~~TRINITY_DN3022_c0_g1_i13.p1;ORF_type:5prime_partial_(-),score=36.83	0	-	2545	3181	0	1	3181	0	No
TRINITY_DN0_c1_g1_i1	.	+	TRINITY_DN3022_c0_g1_i12	0	2083	ID=TRINITY_DN3022_c0_g1_i12.p1;TRINITY_DN3022_c0_g1~~TRINITY_DN3022_c0_g1_i12.p1;ORF_type:5prime_partial_(-),score=36.83	0	-	1447	2083	0	1	2083	0	No
TRINITY_DN0_c1_g1_i1	.	+	TRINITY_DN3022_c0_g1_i12	0	2083	ID=TRINITY_DN3022_c0_g1_i12.p2;TRINITY_DN3022_c0_g1~~TRINITY_DN3022_c0_g1_i12.p2;ORF_type:complete_(-),score=30.96	0	-	195	762	0	1	2083	0	No
TRINITY_DN0_c1_g1_i1	.	-	TRINITY_DN4636_c0_g1_i2	0	1028	ID=TRINITY_DN4636_c0_g1_i2.p1;TRINITY_DN4636_c0_g1~~TRINITY_DN4636_c0_g1_i2.p1;ORF_type:3prime_partial_(-),score=19.72	0	-	2	314	0	1	1028	0	No
TRINITY_DN0_c1_g1_i1	.	-	TRINITY_DN4636_c0_g1_i2	0	1028	ID=TRINITY_DN4636_c0_g1_i2.p1;TRINITY_DN4636_c0_g1~~TRINITY_DN4636_c0_g1_i2.p1;ORF_type:3prime_partial_(-),score=19.72	0	-	2	314	0	1	1028	0	No
TRINITY_DN0_c1_g1_i1	.	+	TRINITY_DN5752_c0_g1_i2	0	1155	ID=TRINITY_DN5752_c0_g1_i2.p1;TRINITY_DN5752_c0_g1~~TRINITY_DN5752_c0_g1_i2.p1;ORF_type:complete_(-),score=25.99	0	-	368	827	0	1	1155	0	No
TRINITY_DN0_c1_g1_i10	.	+	TRINITY_DN0_c1_g1_i13	0	682	ID=TRINITY_DN0_c1_g1_i13.p1;TRINITY_DN0_c1_g1~~TRINITY_DN0_c1_g1_i13.p1;ORF_type:5prime_partial_(+),score=1.27	0	+	2	359	0	1	682	0	No
TRINITY_DN0_c1_g1_i10	.	+	TRINITY_DN0_c1_g1_i13	0	682	ID=TRINITY_DN0_c1_g1_i13.p1;TRINITY_DN0_c1_g1~~TRINITY_DN0_c1_g1_i13.p1;ORF_type:5prime_partial_(+),score=1.27	0	+	2	359	0	1	682	0	No
TRINITY_DN0_c1_g1_i10	.	+	TRINITY_DN0_c1_g1_i13	0	682	ID=TRINITY_DN0_c1_g1_i13.p1;TRINITY_DN0_c1_g1~~TRINITY_DN0_c1_g1_i13.p1;ORF_type:5prime_partial_(+),score=1.27	0	+	2	359	0	1	682	0	No
TRINITY_DN0_c1_g1_i10	.	-	TRINITY_DN6246_c0_g1_i7	0	3200	ID=TRINITY_DN6246_c0_g1_i7.p1;TRINITY_DN6246_c0_g1~~TRINITY_DN6246_c0_g1_i7.p1;ORF_type:complete_(-),score=92.36	0	-	945	3012	0	1	3200	0	No
TRINITY_DN0_c1_g1_i10	.	+	TRINITY_DN6000_c0_g1_i26	0	2521	ID=TRINITY_DN6000_c0_g1_i26.p1;TRINITY_DN6000_c0_g1~~TRINITY_DN6000_c0_g1_i26.p1;ORF_type:complete_(-),score=65.57	0	-	429	1629	0	1	2521	0	No
TRINITY_DN0_c1_g1_i10	.	+	TRINITY_DN6000_c0_g1_i23	0	2775	ID=TRINITY_DN6000_c0_g1_i23.p1;TRINITY_DN6000_c0_g1~~TRINITY_DN6000_c0_g1_i23.p1;ORF_type:complete_(-),score=49.26	0	-	429	1158	0	1	2775	0	No
TRINITY_DN0_c1_g1_i10	.	+	TRINITY_DN3898_c2_g1_i1	0	2438	ID=TRINITY_DN3898_c2_g1_i1.p3;TRINITY_DN3898_c2_g1~~TRINITY_DN3898_c2_g1_i1.p3;ORF_type:complete_(-),score=22.61	0	-	1832	2195	0	1	2438	0	No
TRINITY_DN0_c1_g1_i10	.	+	TRINITY_DN3898_c2_g1_i1	0	2438	ID=TRINITY_DN3898_c2_g1_i1.p1;TRINITY_DN3898_c2_g1~~TRINITY_DN3898_c2_g1_i1.p1;ORF_type:5prime_partial_(+),score=28.75	0	+	1	676	0	1	2438	0	No
TRINITY_DN0_c1_g1_i10	.	+	TRINITY_DN3898_c2_g1_i1	0	2438	ID=TRINITY_DN3898_c2_g1_i1.p2;TRINITY_DN3898_c2_g1~~TRINITY_DN3898_c2_g1_i1.p2;ORF_type:complete_(+),score=28.03	0	+	927	1440	0	1	2438	0	No
TRINITY_DN0_c1_g1_i10	.	-	TRINITY_DN12941_c0_g1_i4	0	660	ID=TRINITY_DN12941_c0_g1_i4.p1;TRINITY_DN12941_c0_g1~~TRINITY_DN12941_c0_g1_i4.p1;ORF_type:complete_(+),score=9.14	0	+	170	626	0	1	660	0	No
TRINITY_DN0_c1_g1_i10	.	-	TRINITY_DN12941_c0_g1_i4	0	660	ID=TRINITY_DN12941_c0_g1_i4.p1;TRINITY_DN12941_c0_g1~~TRINITY_DN12941_c0_g1_i4.p1;ORF_type:complete_(+),score=9.14	0	+	170	626	0	1	660	0	No
TRINITY_DN0_c1_g1_i10	.	-	TRINITY_DN13854_c0_g1_i2	0	4805	ID=TRINITY_DN13854_c0_g1_i2.p1;TRINITY_DN13854_c0_g1~~TRINITY_DN13854_c0_g1_i2.p1;ORF_type:complete_(+),score=226.97	0	+	402	3168	0	1	4805	0	No
TRINITY_DN0_c1_g1_i10	.	-	TRINITY_DN13854_c0_g1_i2	0	4805	ID=TRINITY_DN13854_c0_g1_i2.p2;TRINITY_DN13854_c0_g1~~TRINITY_DN13854_c0_g1_i2.p2;ORF_type:complete_(+),score=11.10	0	+	3880	4399	0	1	4805	0	No
TRINITY_DN0_c1_g1_i10	.	-	TRINITY_DN13854_c0_g1_i11	0	4646	ID=TRINITY_DN13854_c0_g1_i11.p1;TRINITY_DN13854_c0_g1~~TRINITY_DN13854_c0_g1_i11.p1;ORF_type:complete_(+),score=216.40	0	+	402	3009	0	1	4646	0	No
TRINITY_DN0_c1_g1_i10	.	-	TRINITY_DN13854_c0_g1_i11	0	4646	ID=TRINITY_DN13854_c0_g1_i11.p2;TRINITY_DN13854_c0_g1~~TRINITY_DN13854_c0_g1_i11.p2;ORF_type:complete_(+),score=11.10	0	+	3721	4240	0	1	4646	0	No
TRINITY_DN0_c1_g1_i10	.	+	TRINITY_DN18110_c1_g1_i1	0	923	ID=TRINITY_DN18110_c1_g1_i1.p1;TRINITY_DN18110_c1_g1~~TRINITY_DN18110_c1_g1_i1.p1;ORF_type:5prime_partial_(+),score=29.76	0	+	1	517	0	1	923	0	No
TRINITY_DN0_c1_g1_i10	.	-	TRINITY_DN9870_c0_g1_i2	0	2558	ID=TRINITY_DN9870_c0_g1_i2.p1;TRINITY_DN9870_c0_g1~~TRINITY_DN9870_c0_g1_i2.p1;ORF_type:complete_(+),score=40.59	0	+	1747	2287	0	1	2558	0	No
TRINITY_DN0_c1_g1_i10	.	-	TRINITY_DN9422_c1_g1_i9	0	1528	ID=TRINITY_DN9422_c1_g1_i9.p1;TRINITY_DN9422_c1_g1~~TRINITY_DN9422_c1_g1_i9.p1;ORF_type:complete_(-),score=58.09	0	-	401	1241	0	1	1528	0	No
TRINITY_DN0_c1_g1_i10	.	-	TRINITY_DN824_c0_g2_i2	0	1043	ID=TRINITY_DN824_c0_g2_i2.p1;TRINITY_DN824_c0_g2~~TRINITY_DN824_c0_g2_i2.p1;ORF_type:complete_(-),score=41.59	0	-	245	965	0	1	1043	0	No
TRINITY_DN0_c1_g1_i10	.	-	TRINITY_DN824_c0_g2_i2	0	1043	ID=TRINITY_DN824_c0_g2_i2.p1;TRINITY_DN824_c0_g2~~TRINITY_DN824_c0_g2_i2.p1;ORF_type:complete_(-),score=41.59	0	-	245	965	0	1	1043	0	No
TRINITY_DN0_c1_g1_i10	.	-	TRINITY_DN824_c0_g2_i10	0	1204	ID=TRINITY_DN824_c0_g2_i10.p1;TRINITY_DN824_c0_g2~~TRINITY_DN824_c0_g2_i10.p1;ORF_type:complete_(-),score=41.59	0	-	406	1126	0	1	1204	0	No
TRINITY_DN0_c1_g1_i10	.	-	TRINITY_DN824_c0_g2_i10	0	1204	ID=TRINITY_DN824_c0_g2_i10.p1;TRINITY_DN824_c0_g2~~TRINITY_DN824_c0_g2_i10.p1;ORF_type:complete_(-),score=41.59	0	-	406	1126	0	1	1204	0	No
TRINITY_DN0_c1_g1_i10	.	+	TRINITY_DN10038_c0_g1_i8	0	1294	ID=TRINITY_DN10038_c0_g1_i8.p1;TRINITY_DN10038_c0_g1~~TRINITY_DN10038_c0_g1_i8.p1;ORF_type:complete_(+),score=7.86	0	+	332	785	0	1	1294	0	No
TRINITY_DN0_c1_g1_i10	.	-	TRINITY_DN3177_c0_g1_i60	0	3294	ID=TRINITY_DN3177_c0_g1_i60.p1;TRINITY_DN3177_c0_g1~~TRINITY_DN3177_c0_g1_i60.p1;ORF_type:complete_(+),score=44.56	0	+	1529	2408	0	1	3294	0	No
TRINITY_DN0_c1_g1_i10	.	-	TRINITY_DN3177_c0_g1_i56	0	3224	ID=TRINITY_DN3177_c0_g1_i56.p1;TRINITY_DN3177_c0_g1~~TRINITY_DN3177_c0_g1_i56.p1;ORF_type:complete_(+),score=44.56	0	+	1459	2338	0	1	3224	0	No
TRINITY_DN0_c1_g1_i10	.	-	TRINITY_DN3177_c0_g1_i43	0	3502	ID=TRINITY_DN3177_c0_g1_i43.p1;TRINITY_DN3177_c0_g1~~TRINITY_DN3177_c0_g1_i43.p1;ORF_type:complete_(+),score=44.56	0	+	1737	2616	0	1	3502	0	No
TRINITY_DN0_c1_g1_i10	.	-	TRINITY_DN3177_c0_g1_i30	0	3371	ID=TRINITY_DN3177_c0_g1_i30.p1;TRINITY_DN3177_c0_g1~~TRINITY_DN3177_c0_g1_i30.p1;ORF_type:complete_(+),score=44.56	0	+	1606	2485	0	1	3371	0	No
TRINITY_DN0_c1_g1_i10	.	-	TRINITY_DN9856_c0_g1_i1	0	299	ID=TRINITY_DN9856_c0_g1_i1.p1;TRINITY_DN9856_c0_g1~~TRINITY_DN9856_c0_g1_i1.p1;ORF_type:internal_(-),score=15.45	0	-	1	298	0	1	299	0	No
TRINITY_DN0_c1_g1_i10	.	+	TRINITY_DN4232_c1_g1_i6	0	436	ID=TRINITY_DN4232_c1_g1_i6.p1;TRINITY_DN4232_c1_g1~~TRINITY_DN4232_c1_g1_i6.p1;ORF_type:5prime_partial_(+),score=5.34	0	+	2	302	0	1	436	0	No
TRINITY_DN0_c1_g1_i10	.	+	TRINITY_DN5574_c0_g1_i4	0	2291	ID=TRINITY_DN5574_c0_g1_i4.p1;TRINITY_DN5574_c0_g1~~TRINITY_DN5574_c0_g1_i4.p1;ORF_type:complete_(-),score=23.72	0	-	1086	1638	0	1	2291	0	No
TRINITY_DN0_c1_g1_i10	.	-	TRINITY_DN17109_c0_g1_i1	0	897	ID=TRINITY_DN17109_c0_g1_i1.p1;TRINITY_DN17109_c0_g1~~TRINITY_DN17109_c0_g1_i1.p1;ORF_type:complete_(+),score=16.31	0	+	207	552	0	1	897	0	No
TRINITY_DN0_c1_g1_i10	.	+	TRINITY_DN2720_c0_g1_i59	0	2417	ID=TRINITY_DN2720_c0_g1_i59.p1;TRINITY_DN2720_c0_g1~~TRINITY_DN2720_c0_g1_i59.p1;ORF_type:complete_(+),score=63.29	0	+	279	1908	0	1	2417	0	No
TRINITY_DN0_c1_g1_i10	.	+	TRINITY_DN13652_c0_g1_i4	0	2014	ID=TRINITY_DN13652_c0_g1_i4.p1;TRINITY_DN13652_c0_g1~~TRINITY_DN13652_c0_g1_i4.p1;ORF_type:complete_(+),score=70.74	0	+	61	1288	0	1	2014	0	No
TRINITY_DN0_c1_g1_i10	.	+	TRINITY_DN13652_c0_g1_i3	0	2164	ID=TRINITY_DN13652_c0_g1_i3.p1;TRINITY_DN13652_c0_g1~~TRINITY_DN13652_c0_g1_i3.p1;ORF_type:complete_(+),score=61.88	0	+	61	1207	0	1	2164	0	No
TRINITY_DN0_c1_g1_i10	.	+	TRINITY_DN13652_c0_g1_i1	0	3196	ID=TRINITY_DN13652_c0_g1_i1.p2;TRINITY_DN13652_c0_g1~~TRINITY_DN13652_c0_g1_i1.p2;ORF_type:complete_(+),score=31.65	0	+	2107	2470	0	1	3196	0	No
TRINITY_DN0_c1_g1_i10	.	+	TRINITY_DN13652_c0_g1_i1	0	3196	ID=TRINITY_DN13652_c0_g1_i1.p1;TRINITY_DN13652_c0_g1~~TRINITY_DN13652_c0_g1_i1.p1;ORF_type:complete_(+),score=26.82	0	+	61	793	0	1	3196	0	No
TRINITY_DN0_c1_g1_i10	.	+	TRINITY_DN130348_c0_g1_i1	0	332	ID=TRINITY_DN130348_c0_g1_i1.p1;TRINITY_DN130348_c0_g1~~TRINITY_DN130348_c0_g1_i1.p1;ORF_type:internal_(-),score=11.20	0	-	2	332	0	1	332	0	No
TRINITY_DN0_c1_g1_i10	.	+	TRINITY_DN6935_c0_g1_i2	0	1393	ID=TRINITY_DN6935_c0_g1_i2.p1;TRINITY_DN6935_c0_g1~~TRINITY_DN6935_c0_g1_i2.p1;ORF_type:complete_(-),score=20.47	0	-	968	1310	0	1	1393	0	No
TRINITY_DN0_c1_g1_i10	.	+	TRINITY_DN18177_c0_g2_i1	0	1211	ID=TRINITY_DN18177_c0_g2_i1.p1;TRINITY_DN18177_c0_g2~~TRINITY_DN18177_c0_g2_i1.p1;ORF_type:complete_(+),score=10.47	0	+	408	723	0	1	1211	0	No
TRINITY_DN0_c1_g1_i10	.	+	TRINITY_DN3022_c0_g1_i13	0	3181	ID=TRINITY_DN3022_c0_g1_i13.p2;TRINITY_DN3022_c0_g1~~TRINITY_DN3022_c0_g1_i13.p2;ORF_type:complete_(-),score=30.96	0	-	1293	1860	0	1	3181	0	No
TRINITY_DN0_c1_g1_i10	.	+	TRINITY_DN3022_c0_g1_i13	0	3181	ID=TRINITY_DN3022_c0_g1_i13.p1;TRINITY_DN3022_c0_g1~~TRINITY_DN3022_c0_g1_i13.p1;ORF_type:5prime_partial_(-),score=36.83	0	-	2545	3181	0	1	3181	0	No
TRINITY_DN0_c1_g1_i10	.	+	TRINITY_DN3022_c0_g1_i12	0	2083	ID=TRINITY_DN3022_c0_g1_i12.p1;TRINITY_DN3022_c0_g1~~TRINITY_DN3022_c0_g1_i12.p1;ORF_type:5prime_partial_(-),score=36.83	0	-	1447	2083	0	1	2083	0	No
TRINITY_DN0_c1_g1_i10	.	+	TRINITY_DN3022_c0_g1_i12	0	2083	ID=TRINITY_DN3022_c0_g1_i12.p2;TRINITY_DN3022_c0_g1~~TRINITY_DN3022_c0_g1_i12.p2;ORF_type:complete_(-),score=30.96	0	-	195	762	0	1	2083	0	No
TRINITY_DN0_c1_g1_i10	.	-	TRINITY_DN4636_c0_g1_i2	0	1028	ID=TRINITY_DN4636_c0_g1_i2.p1;TRINITY_DN4636_c0_g1~~TRINITY_DN4636_c0_g1_i2.p1;ORF_type:3prime_partial_(-),score=19.72	0	-	2	314	0	1	1028	0	No
TRINITY_DN0_c1_g1_i10	.	+	TRINITY_DN5752_c0_g1_i2	0	1155	ID=TRINITY_DN5752_c0_g1_i2.p1;TRINITY_DN5752_c0_g1~~TRINITY_DN5752_c0_g1_i2.p1;ORF_type:complete_(-),score=25.99	0	-	368	827	0	1	1155	0	No
TRINITY_DN0_c1_g1_i10	.	+	TRINITY_DN6880_c1_g1_i1	0	2121	ID=TRINITY_DN6880_c1_g1_i1.p1;TRINITY_DN6880_c1_g1~~TRINITY_DN6880_c1_g1_i1.p1;ORF_type:complete_(-),score=47.45	0	-	1318	2077	0	1	2121	0	No
TRINITY_DN0_c1_g1_i14	.	+	TRINITY_DN0_c1_g1_i13	0	682	ID=TRINITY_DN0_c1_g1_i13.p1;TRINITY_DN0_c1_g1~~TRINITY_DN0_c1_g1_i13.p1;ORF_type:5prime_partial_(+),score=1.27	0	+	2	359	0	1	682	0	No
TRINITY_DN0_c1_g1_i14	.	+	TRINITY_DN0_c1_g1_i13	0	682	ID=TRINITY_DN0_c1_g1_i13.p1;TRINITY_DN0_c1_g1~~TRINITY_DN0_c1_g1_i13.p1;ORF_type:5prime_partial_(+),score=1.27	0	+	2	359	0	1	682	0	No
TRINITY_DN0_c1_g1_i14	.	+	TRINITY_DN0_c1_g1_i13	0	682	ID=TRINITY_DN0_c1_g1_i13.p1;TRINITY_DN0_c1_g1~~TRINITY_DN0_c1_g1_i13.p1;ORF_type:5prime_partial_(+),score=1.27	0	+	2	359	0	1	682	0	No
TRINITY_DN0_c1_g1_i14	.	+	TRINITY_DN0_c1_g1_i13	0	682	ID=TRINITY_DN0_c1_g1_i13.p1;TRINITY_DN0_c1_g1~~TRINITY_DN0_c1_g1_i13.p1;ORF_type:5prime_partial_(+),score=1.27	0	+	2	359	0	1	682	0	No
TRINITY_DN0_c1_g1_i14	.	+	TRINITY_DN4232_c1_g1_i6	0	436	ID=TRINITY_DN4232_c1_g1_i6.p1;TRINITY_DN4232_c1_g1~~TRINITY_DN4232_c1_g1_i6.p1;ORF_type:5prime_partial_(+),score=5.34	0	+	2	302	0	1	436	0	No
TRINITY_DN0_c1_g1_i14	.	+	TRINITY_DN4232_c1_g1_i6	0	436	ID=TRINITY_DN4232_c1_g1_i6.p1;TRINITY_DN4232_c1_g1~~TRINITY_DN4232_c1_g1_i6.p1;ORF_type:5prime_partial_(+),score=5.34	0	+	2	302	0	1	436	0	No
TRINITY_DN0_c1_g1_i14	.	+	TRINITY_DN6000_c0_g1_i26	0	2521	ID=TRINITY_DN6000_c0_g1_i26.p1;TRINITY_DN6000_c0_g1~~TRINITY_DN6000_c0_g1_i26.p1;ORF_type:complete_(-),score=65.57	0	-	429	1629	0	1	2521	0	No
TRINITY_DN0_c1_g1_i14	.	+	TRINITY_DN6000_c0_g1_i23	0	2775	ID=TRINITY_DN6000_c0_g1_i23.p1;TRINITY_DN6000_c0_g1~~TRINITY_DN6000_c0_g1_i23.p1;ORF_type:complete_(-),score=49.26	0	-	429	1158	0	1	2775	0	No
TRINITY_DN0_c1_g1_i14	.	+	TRINITY_DN3898_c2_g1_i1	0	2438	ID=TRINITY_DN3898_c2_g1_i1.p3;TRINITY_DN3898_c2_g1~~TRINITY_DN3898_c2_g1_i1.p3;ORF_type:complete_(-),score=22.61	0	-	1832	2195	0	1	2438	0	No
TRINITY_DN0_c1_g1_i14	.	+	TRINITY_DN3898_c2_g1_i1	0	2438	ID=TRINITY_DN3898_c2_g1_i1.p1;TRINITY_DN3898_c2_g1~~TRINITY_DN3898_c2_g1_i1.p1;ORF_type:5prime_partial_(+),score=28.75	0	+	1	676	0	1	2438	0	No
TRINITY_DN0_c1_g1_i14	.	+	TRINITY_DN3898_c2_g1_i1	0	2438	ID=TRINITY_DN3898_c2_g1_i1.p2;TRINITY_DN3898_c2_g1~~TRINITY_DN3898_c2_g1_i1.p2;ORF_type:complete_(+),score=28.03	0	+	927	1440	0	1	2438	0	No
TRINITY_DN0_c1_g1_i14	.	-	TRINITY_DN12941_c0_g1_i4	0	660	ID=TRINITY_DN12941_c0_g1_i4.p1;TRINITY_DN12941_c0_g1~~TRINITY_DN12941_c0_g1_i4.p1;ORF_type:complete_(+),score=9.14	0	+	170	626	0	1	660	0	No
TRINITY_DN0_c1_g1_i14	.	-	TRINITY_DN13854_c0_g1_i2	0	4805	ID=TRINITY_DN13854_c0_g1_i2.p1;TRINITY_DN13854_c0_g1~~TRINITY_DN13854_c0_g1_i2.p1;ORF_type:complete_(+),score=226.97	0	+	402	3168	0	1	4805	0	No
TRINITY_DN0_c1_g1_i14	.	-	TRINITY_DN13854_c0_g1_i2	0	4805	ID=TRINITY_DN13854_c0_g1_i2.p2;TRINITY_DN13854_c0_g1~~TRINITY_DN13854_c0_g1_i2.p2;ORF_type:complete_(+),score=11.10	0	+	3880	4399	0	1	4805	0	No
TRINITY_DN0_c1_g1_i14	.	-	TRINITY_DN13854_c0_g1_i11	0	4646	ID=TRINITY_DN13854_c0_g1_i11.p1;TRINITY_DN13854_c0_g1~~TRINITY_DN13854_c0_g1_i11.p1;ORF_type:complete_(+),score=216.40	0	+	402	3009	0	1	4646	0	No
TRINITY_DN0_c1_g1_i14	.	-	TRINITY_DN13854_c0_g1_i11	0	4646	ID=TRINITY_DN13854_c0_g1_i11.p2;TRINITY_DN13854_c0_g1~~TRINITY_DN13854_c0_g1_i11.p2;ORF_type:complete_(+),score=11.10	0	+	3721	4240	0	1	4646	0	No
TRINITY_DN0_c1_g1_i14	.	-	TRINITY_DN6246_c0_g2_i1	0	507	ID=TRINITY_DN6246_c0_g2_i1.p1;TRINITY_DN6246_c0_g2~~TRINITY_DN6246_c0_g2_i1.p1;ORF_type:complete_(+),score=0.78	0	+	123	471	0	1	507	0	No
TRINITY_DN0_c1_g1_i14	.	+	TRINITY_DN18110_c1_g1_i1	0	923	ID=TRINITY_DN18110_c1_g1_i1.p1;TRINITY_DN18110_c1_g1~~TRINITY_DN18110_c1_g1_i1.p1;ORF_type:5prime_partial_(+),score=29.76	0	+	1	517	0	1	923	0	No
TRINITY_DN0_c1_g1_i14	.	-	TRINITY_DN3177_c0_g1_i60	0	3294	ID=TRINITY_DN3177_c0_g1_i60.p1;TRINITY_DN3177_c0_g1~~TRINITY_DN3177_c0_g1_i60.p1;ORF_type:complete_(+),score=44.56	0	+	1529	2408	0	1	3294	0	No
TRINITY_DN0_c1_g1_i14	.	-	TRINITY_DN3177_c0_g1_i60	0	3294	ID=TRINITY_DN3177_c0_g1_i60.p1;TRINITY_DN3177_c0_g1~~TRINITY_DN3177_c0_g1_i60.p1;ORF_type:complete_(+),score=44.56	0	+	1529	2408	0	1	3294	0	No
TRINITY_DN0_c1_g1_i14	.	-	TRINITY_DN3177_c0_g1_i56	0	3224	ID=TRINITY_DN3177_c0_g1_i56.p1;TRINITY_DN3177_c0_g1~~TRINITY_DN3177_c0_g1_i56.p1;ORF_type:complete_(+),score=44.56	0	+	1459	2338	0	1	3224	0	No
TRINITY_DN0_c1_g1_i14	.	-	TRINITY_DN3177_c0_g1_i56	0	3224	ID=TRINITY_DN3177_c0_g1_i56.p1;TRINITY_DN3177_c0_g1~~TRINITY_DN3177_c0_g1_i56.p1;ORF_type:complete_(+),score=44.56	0	+	1459	2338	0	1	3224	0	No
TRINITY_DN0_c1_g1_i14	.	-	TRINITY_DN3177_c0_g1_i43	0	3502	ID=TRINITY_DN3177_c0_g1_i43.p1;TRINITY_DN3177_c0_g1~~TRINITY_DN3177_c0_g1_i43.p1;ORF_type:complete_(+),score=44.56	0	+	1737	2616	0	1	3502	0	No
TRINITY_DN0_c1_g1_i14	.	-	TRINITY_DN3177_c0_g1_i43	0	3502	ID=TRINITY_DN3177_c0_g1_i43.p1;TRINITY_DN3177_c0_g1~~TRINITY_DN3177_c0_g1_i43.p1;ORF_type:complete_(+),score=44.56	0	+	1737	2616	0	1	3502	0	No
TRINITY_DN0_c1_g1_i14	.	-	TRINITY_DN3177_c0_g1_i30	0	3371	ID=TRINITY_DN3177_c0_g1_i30.p1;TRINITY_DN3177_c0_g1~~TRINITY_DN3177_c0_g1_i30.p1;ORF_type:complete_(+),score=44.56	0	+	1606	2485	0	1	3371	0	No
TRINITY_DN0_c1_g1_i14	.	-	TRINITY_DN3177_c0_g1_i30	0	3371	ID=TRINITY_DN3177_c0_g1_i30.p1;TRINITY_DN3177_c0_g1~~TRINITY_DN3177_c0_g1_i30.p1;ORF_type:complete_(+),score=44.56	0	+	1606	2485	0	1	3371	0	No
TRINITY_DN0_c1_g1_i14	.	-	TRINITY_DN9870_c0_g1_i2	0	2558	ID=TRINITY_DN9870_c0_g1_i2.p1;TRINITY_DN9870_c0_g1~~TRINITY_DN9870_c0_g1_i2.p1;ORF_type:complete_(+),score=40.59	0	+	1747	2287	0	1	2558	0	No
TRINITY_DN0_c1_g1_i14	.	-	TRINITY_DN9870_c0_g1_i2	0	2558	ID=TRINITY_DN9870_c0_g1_i2.p1;TRINITY_DN9870_c0_g1~~TRINITY_DN9870_c0_g1_i2.p1;ORF_type:complete_(+),score=40.59	0	+	1747	2287	0	1	2558	0	No
TRINITY_DN0_c1_g1_i14	.	-	TRINITY_DN93263_c0_g1_i1	0	959	ID=TRINITY_DN93263_c0_g1_i1.p1;TRINITY_DN93263_c0_g1~~TRINITY_DN93263_c0_g1_i1.p1;ORF_type:5prime_partial_(-),score=0.33	0	-	655	958	0	1	959	0	No
TRINITY_DN0_c1_g1_i14	.	-	TRINITY_DN9422_c1_g1_i9	0	1528	ID=TRINITY_DN9422_c1_g1_i9.p1;TRINITY_DN9422_c1_g1~~TRINITY_DN9422_c1_g1_i9.p1;ORF_type:complete_(-),score=58.09	0	-	401	1241	0	1	1528	0	No
TRINITY_DN0_c1_g1_i14	.	+	TRINITY_DN6579_c0_g1_i5	0	1847	ID=TRINITY_DN6579_c0_g1_i5.p1;TRINITY_DN6579_c0_g1~~TRINITY_DN6579_c0_g1_i5.p1;ORF_type:complete_(+),score=64.00	0	+	179	1124	0	1	1847	0	No
TRINITY_DN0_c1_g1_i14	.	+	TRINITY_DN10657_c0_g1_i11	0	2757	ID=TRINITY_DN10657_c0_g1_i11.p1;TRINITY_DN10657_c0_g1~~TRINITY_DN10657_c0_g1_i11.p1;ORF_type:complete_(+),score=2.29	0	+	775	1201	0	1	2757	0	No
TRINITY_DN0_c1_g1_i14	.	+	TRINITY_DN10038_c0_g1_i8	0	1294	ID=TRINITY_DN10038_c0_g1_i8.p1;TRINITY_DN10038_c0_g1~~TRINITY_DN10038_c0_g1_i8.p1;ORF_type:complete_(+),score=7.86	0	+	332	785	0	1	1294	0	No
TRINITY_DN0_c1_g1_i14	.	-	TRINITY_DN17109_c0_g1_i1	0	897	ID=TRINITY_DN17109_c0_g1_i1.p1;TRINITY_DN17109_c0_g1~~TRINITY_DN17109_c0_g1_i1.p1;ORF_type:complete_(+),score=16.31	0	+	207	552	0	1	897	0	No
TRINITY_DN0_c1_g1_i14	.	+	TRINITY_DN2720_c0_g1_i59	0	2417	ID=TRINITY_DN2720_c0_g1_i59.p1;TRINITY_DN2720_c0_g1~~TRINITY_DN2720_c0_g1_i59.p1;ORF_type:complete_(+),score=63.29	0	+	279	1908	0	1	2417	0	No
TRINITY_DN0_c1_g1_i14	.	-	TRINITY_DN824_c0_g2_i2	0	1043	ID=TRINITY_DN824_c0_g2_i2.p1;TRINITY_DN824_c0_g2~~TRINITY_DN824_c0_g2_i2.p1;ORF_type:complete_(-),score=41.59	0	-	245	965	0	1	1043	0	No
TRINITY_DN0_c1_g1_i14	.	-	TRINITY_DN824_c0_g2_i10	0	1204	ID=TRINITY_DN824_c0_g2_i10.p1;TRINITY_DN824_c0_g2~~TRINITY_DN824_c0_g2_i10.p1;ORF_type:complete_(-),score=41.59	0	-	406	1126	0	1	1204	0	No
TRINITY_DN0_c1_g1_i14	.	+	TRINITY_DN5630_c0_g1_i95	0	3638	ID=TRINITY_DN5630_c0_g1_i95.p1;TRINITY_DN5630_c0_g1~~TRINITY_DN5630_c0_g1_i95.p1;ORF_type:complete_(+),score=186.04	0	+	240	2793	0	1	3638	0	No
TRINITY_DN0_c1_g1_i14	.	+	TRINITY_DN5630_c0_g1_i59	0	4168	ID=TRINITY_DN5630_c0_g1_i59.p1;TRINITY_DN5630_c0_g1~~TRINITY_DN5630_c0_g1_i59.p1;ORF_type:complete_(+),score=113.91	0	+	240	1833	0	1	4168	0	No
TRINITY_DN0_c1_g1_i14	.	+	TRINITY_DN5630_c0_g1_i59	0	4168	ID=TRINITY_DN5630_c0_g1_i59.p2;TRINITY_DN5630_c0_g1~~TRINITY_DN5630_c0_g1_i59.p2;ORF_type:complete_(+),score=62.59	0	+	2480	3323	0	1	4168	0	No
TRINITY_DN0_c1_g1_i14	.	+	TRINITY_DN130348_c0_g1_i1	0	332	ID=TRINITY_DN130348_c0_g1_i1.p1;TRINITY_DN130348_c0_g1~~TRINITY_DN130348_c0_g1_i1.p1;ORF_type:internal_(-),score=11.20	0	-	2	332	0	1	332	0	No
TRINITY_DN0_c1_g1_i14	.	+	TRINITY_DN1365_c0_g1_i1	0	1803	ID=TRINITY_DN1365_c0_g1_i1.p1;TRINITY_DN1365_c0_g1~~TRINITY_DN1365_c0_g1_i1.p1;ORF_type:complete_(-),score=2.59	0	-	1267	1663	0	1	1803	0	No
TRINITY_DN0_c1_g1_i14	.	+	TRINITY_DN6935_c0_g1_i2	0	1393	ID=TRINITY_DN6935_c0_g1_i2.p1;TRINITY_DN6935_c0_g1~~TRINITY_DN6935_c0_g1_i2.p1;ORF_type:complete_(-),score=20.47	0	-	968	1310	0	1	1393	0	No
TRINITY_DN0_c1_g1_i14	.	+	TRINITY_DN6935_c0_g1_i2	0	1393	ID=TRINITY_DN6935_c0_g1_i2.p1;TRINITY_DN6935_c0_g1~~TRINITY_DN6935_c0_g1_i2.p1;ORF_type:complete_(-),score=20.47	0	-	968	1310	0	1	1393	0	No
TRINITY_DN0_c1_g1_i14	.	+	TRINITY_DN5574_c0_g1_i4	0	2291	ID=TRINITY_DN5574_c0_g1_i4.p1;TRINITY_DN5574_c0_g1~~TRINITY_DN5574_c0_g1_i4.p1;ORF_type:complete_(-),score=23.72	0	-	1086	1638	0	1	2291	0	No
TRINITY_DN0_c1_g1_i14	.	+	TRINITY_DN18177_c0_g2_i1	0	1211	ID=TRINITY_DN18177_c0_g2_i1.p1;TRINITY_DN18177_c0_g2~~TRINITY_DN18177_c0_g2_i1.p1;ORF_type:complete_(+),score=10.47	0	+	408	723	0	1	1211	0	No
TRINITY_DN0_c1_g1_i14	.	+	TRINITY_DN13652_c0_g1_i4	0	2014	ID=TRINITY_DN13652_c0_g1_i4.p1;TRINITY_DN13652_c0_g1~~TRINITY_DN13652_c0_g1_i4.p1;ORF_type:complete_(+),score=70.74	0	+	61	1288	0	1	2014	0	No
TRINITY_DN0_c1_g1_i14	.	+	TRINITY_DN13652_c0_g1_i3	0	2164	ID=TRINITY_DN13652_c0_g1_i3.p1;TRINITY_DN13652_c0_g1~~TRINITY_DN13652_c0_g1_i3.p1;ORF_type:complete_(+),score=61.88	0	+	61	1207	0	1	2164	0	No
TRINITY_DN0_c1_g1_i14	.	+	TRINITY_DN13652_c0_g1_i1	0	3196	ID=TRINITY_DN13652_c0_g1_i1.p2;TRINITY_DN13652_c0_g1~~TRINITY_DN13652_c0_g1_i1.p2;ORF_type:complete_(+),score=31.65	0	+	2107	2470	0	1	3196	0	No
TRINITY_DN0_c1_g1_i14	.	+	TRINITY_DN13652_c0_g1_i1	0	3196	ID=TRINITY_DN13652_c0_g1_i1.p1;TRINITY_DN13652_c0_g1~~TRINITY_DN13652_c0_g1_i1.p1;ORF_type:complete_(+),score=26.82	0	+	61	793	0	1	3196	0	No
TRINITY_DN0_c1_g1_i14	.	-	TRINITY_DN16221_c0_g1_i2	0	4121	ID=TRINITY_DN16221_c0_g1_i2.p1;TRINITY_DN16221_c0_g1~~TRINITY_DN16221_c0_g1_i2.p1;ORF_type:complete_(-),score=173.90	0	-	1122	3759	0	1	4121	0	No
TRINITY_DN0_c1_g1_i14	.	-	TRINITY_DN9856_c0_g1_i1	0	299	ID=TRINITY_DN9856_c0_g1_i1.p1;TRINITY_DN9856_c0_g1~~TRINITY_DN9856_c0_g1_i1.p1;ORF_type:internal_(-),score=15.45	0	-	1	298	0	1	299	0	No
TRINITY_DN0_c1_g1_i14	.	-	TRINITY_DN9856_c0_g1_i1	0	299	ID=TRINITY_DN9856_c0_g1_i1.p1;TRINITY_DN9856_c0_g1~~TRINITY_DN9856_c0_g1_i1.p1;ORF_type:internal_(-),score=15.45	0	-	1	298	0	1	299	0	No
TRINITY_DN0_c1_g1_i14	.	+	TRINITY_DN3022_c0_g1_i13	0	3181	ID=TRINITY_DN3022_c0_g1_i13.p2;TRINITY_DN3022_c0_g1~~TRINITY_DN3022_c0_g1_i13.p2;ORF_type:complete_(-),score=30.96	0	-	1293	1860	0	1	3181	0	No
TRINITY_DN0_c1_g1_i14	.	+	TRINITY_DN3022_c0_g1_i13	0	3181	ID=TRINITY_DN3022_c0_g1_i13.p1;TRINITY_DN3022_c0_g1~~TRINITY_DN3022_c0_g1_i13.p1;ORF_type:5prime_partial_(-),score=36.83	0	-	2545	3181	0	1	3181	0	No
TRINITY_DN0_c1_g1_i14	.	+	TRINITY_DN3022_c0_g1_i12	0	2083	ID=TRINITY_DN3022_c0_g1_i12.p1;TRINITY_DN3022_c0_g1~~TRINITY_DN3022_c0_g1_i12.p1;ORF_type:5prime_partial_(-),score=36.83	0	-	1447	2083	0	1	2083	0	No
TRINITY_DN0_c1_g1_i14	.	+	TRINITY_DN3022_c0_g1_i12	0	2083	ID=TRINITY_DN3022_c0_g1_i12.p2;TRINITY_DN3022_c0_g1~~TRINITY_DN3022_c0_g1_i12.p2;ORF_type:complete_(-),score=30.96	0	-	195	762	0	1	2083	0	No
TRINITY_DN0_c1_g1_i14	.	-	TRINITY_DN4636_c0_g1_i2	0	1028	ID=TRINITY_DN4636_c0_g1_i2.p1;TRINITY_DN4636_c0_g1~~TRINITY_DN4636_c0_g1_i2.p1;ORF_type:3prime_partial_(-),score=19.72	0	-	2	314	0	1	1028	0	No
TRINITY_DN0_c1_g1_i14	.	-	TRINITY_DN4636_c0_g1_i2	0	1028	ID=TRINITY_DN4636_c0_g1_i2.p1;TRINITY_DN4636_c0_g1~~TRINITY_DN4636_c0_g1_i2.p1;ORF_type:3prime_partial_(-),score=19.72	0	-	2	314	0	1	1028	0	No
TRINITY_DN0_c1_g1_i14	.	+	TRINITY_DN5752_c0_g1_i2	0	1155	ID=TRINITY_DN5752_c0_g1_i2.p1;TRINITY_DN5752_c0_g1~~TRINITY_DN5752_c0_g1_i2.p1;ORF_type:complete_(-),score=25.99	0	-	368	827	0	1	1155	0	No
TRINITY_DN0_c1_g1_i14	.	-	TRINITY_DN11705_c0_g1_i3	0	1741	ID=TRINITY_DN11705_c0_g1_i3.p1;TRINITY_DN11705_c0_g1~~TRINITY_DN11705_c0_g1_i3.p1;ORF_type:complete_(-),score=87.99	0	-	407	1235	0	1	1741	0	No
TRINITY_DN0_c1_g1_i16	.	+	TRINITY_DN0_c1_g1_i13	0	682	ID=TRINITY_DN0_c1_g1_i13.p1;TRINITY_DN0_c1_g1~~TRINITY_DN0_c1_g1_i13.p1;ORF_type:5prime_partial_(+),score=1.27	0	+	2	359	0	1	682	0	No
TRINITY_DN0_c1_g1_i16	.	+	TRINITY_DN0_c1_g1_i13	0	682	ID=TRINITY_DN0_c1_g1_i13.p1;TRINITY_DN0_c1_g1~~TRINITY_DN0_c1_g1_i13.p1;ORF_type:5prime_partial_(+),score=1.27	0	+	2	359	0	1	682	0	No
TRINITY_DN0_c1_g1_i16	.	+	TRINITY_DN0_c1_g1_i13	0	682	ID=TRINITY_DN0_c1_g1_i13.p1;TRINITY_DN0_c1_g1~~TRINITY_DN0_c1_g1_i13.p1;ORF_type:5prime_partial_(+),score=1.27	0	+	2	359	0	1	682	0	No
TRINITY_DN0_c1_g1_i16	.	+	TRINITY_DN0_c1_g1_i13	0	682	ID=TRINITY_DN0_c1_g1_i13.p1;TRINITY_DN0_c1_g1~~TRINITY_DN0_c1_g1_i13.p1;ORF_type:5prime_partial_(+),score=1.27	0	+	2	359	0	1	682	0	No
TRINITY_DN0_c1_g1_i16	.	+	TRINITY_DN4232_c1_g1_i6	0	436	ID=TRINITY_DN4232_c1_g1_i6.p1;TRINITY_DN4232_c1_g1~~TRINITY_DN4232_c1_g1_i6.p1;ORF_type:5prime_partial_(+),score=5.34	0	+	2	302	0	1	436	0	No
TRINITY_DN0_c1_g1_i16	.	-	TRINITY_DN6246_c0_g2_i1	0	507	ID=TRINITY_DN6246_c0_g2_i1.p1;TRINITY_DN6246_c0_g2~~TRINITY_DN6246_c0_g2_i1.p1;ORF_type:complete_(+),score=0.78	0	+	123	471	0	1	507	0	No
TRINITY_DN0_c1_g1_i16	.	-	TRINITY_DN6246_c0_g2_i1	0	507	ID=TRINITY_DN6246_c0_g2_i1.p1;TRINITY_DN6246_c0_g2~~TRINITY_DN6246_c0_g2_i1.p1;ORF_type:complete_(+),score=0.78	0	+	123	471	0	1	507	0	No
TRINITY_DN0_c1_g1_i16	.	+	TRINITY_DN6000_c0_g1_i26	0	2521	ID=TRINITY_DN6000_c0_g1_i26.p1;TRINITY_DN6000_c0_g1~~TRINITY_DN6000_c0_g1_i26.p1;ORF_type:complete_(-),score=65.57	0	-	429	1629	0	1	2521	0	No
TRINITY_DN0_c1_g1_i16	.	+	TRINITY_DN6000_c0_g1_i26	0	2521	ID=TRINITY_DN6000_c0_g1_i26.p1;TRINITY_DN6000_c0_g1~~TRINITY_DN6000_c0_g1_i26.p1;ORF_type:complete_(-),score=65.57	0	-	429	1629	0	1	2521	0	No
TRINITY_DN0_c1_g1_i16	.	+	TRINITY_DN6000_c0_g1_i23	0	2775	ID=TRINITY_DN6000_c0_g1_i23.p1;TRINITY_DN6000_c0_g1~~TRINITY_DN6000_c0_g1_i23.p1;ORF_type:complete_(-),score=49.26	0	-	429	1158	0	1	2775	0	No
TRINITY_DN0_c1_g1_i16	.	+	TRINITY_DN6000_c0_g1_i23	0	2775	ID=TRINITY_DN6000_c0_g1_i23.p1;TRINITY_DN6000_c0_g1~~TRINITY_DN6000_c0_g1_i23.p1;ORF_type:complete_(-),score=49.26	0	-	429	1158	0	1	2775	0	No
TRINITY_DN0_c1_g1_i16	.	+	TRINITY_DN3898_c2_g1_i1	0	2438	ID=TRINITY_DN3898_c2_g1_i1.p3;TRINITY_DN3898_c2_g1~~TRINITY_DN3898_c2_g1_i1.p3;ORF_type:complete_(-),score=22.61	0	-	1832	2195	0	1	2438	0	No
TRINITY_DN0_c1_g1_i16	.	+	TRINITY_DN3898_c2_g1_i1	0	2438	ID=TRINITY_DN3898_c2_g1_i1.p1;TRINITY_DN3898_c2_g1~~TRINITY_DN3898_c2_g1_i1.p1;ORF_type:5prime_partial_(+),score=28.75	0	+	1	676	0	1	2438	0	No
TRINITY_DN0_c1_g1_i16	.	+	TRINITY_DN3898_c2_g1_i1	0	2438	ID=TRINITY_DN3898_c2_g1_i1.p2;TRINITY_DN3898_c2_g1~~TRINITY_DN3898_c2_g1_i1.p2;ORF_type:complete_(+),score=28.03	0	+	927	1440	0	1	2438	0	No
TRINITY_DN0_c1_g1_i16	.	+	TRINITY_DN3898_c2_g1_i1	0	2438	ID=TRINITY_DN3898_c2_g1_i1.p3;TRINITY_DN3898_c2_g1~~TRINITY_DN3898_c2_g1_i1.p3;ORF_type:complete_(-),score=22.61	0	-	1832	2195	0	1	2438	0	No
TRINITY_DN0_c1_g1_i16	.	+	TRINITY_DN3898_c2_g1_i1	0	2438	ID=TRINITY_DN3898_c2_g1_i1.p1;TRINITY_DN3898_c2_g1~~TRINITY_DN3898_c2_g1_i1.p1;ORF_type:5prime_partial_(+),score=28.75	0	+	1	676	0	1	2438	0	No
TRINITY_DN0_c1_g1_i16	.	+	TRINITY_DN3898_c2_g1_i1	0	2438	ID=TRINITY_DN3898_c2_g1_i1.p2;TRINITY_DN3898_c2_g1~~TRINITY_DN3898_c2_g1_i1.p2;ORF_type:complete_(+),score=28.03	0	+	927	1440	0	1	2438	0	No
TRINITY_DN0_c1_g1_i16	.	-	TRINITY_DN13854_c0_g1_i2	0	4805	ID=TRINITY_DN13854_c0_g1_i2.p1;TRINITY_DN13854_c0_g1~~TRINITY_DN13854_c0_g1_i2.p1;ORF_type:complete_(+),score=226.97	0	+	402	3168	0	1	4805	0	No
TRINITY_DN0_c1_g1_i16	.	-	TRINITY_DN13854_c0_g1_i2	0	4805	ID=TRINITY_DN13854_c0_g1_i2.p2;TRINITY_DN13854_c0_g1~~TRINITY_DN13854_c0_g1_i2.p2;ORF_type:complete_(+),score=11.10	0	+	3880	4399	0	1	4805	0	No
TRINITY_DN0_c1_g1_i16	.	-	TRINITY_DN13854_c0_g1_i2	0	4805	ID=TRINITY_DN13854_c0_g1_i2.p1;TRINITY_DN13854_c0_g1~~TRINITY_DN13854_c0_g1_i2.p1;ORF_type:complete_(+),score=226.97	0	+	402	3168	0	1	4805	0	No
TRINITY_DN0_c1_g1_i16	.	-	TRINITY_DN13854_c0_g1_i2	0	4805	ID=TRINITY_DN13854_c0_g1_i2.p2;TRINITY_DN13854_c0_g1~~TRINITY_DN13854_c0_g1_i2.p2;ORF_type:complete_(+),score=11.10	0	+	3880	4399	0	1	4805	0	No
TRINITY_DN0_c1_g1_i16	.	-	TRINITY_DN13854_c0_g1_i11	0	4646	ID=TRINITY_DN13854_c0_g1_i11.p1;TRINITY_DN13854_c0_g1~~TRINITY_DN13854_c0_g1_i11.p1;ORF_type:complete_(+),score=216.40	0	+	402	3009	0	1	4646	0	No
TRINITY_DN0_c1_g1_i16	.	-	TRINITY_DN13854_c0_g1_i11	0	4646	ID=TRINITY_DN13854_c0_g1_i11.p2;TRINITY_DN13854_c0_g1~~TRINITY_DN13854_c0_g1_i11.p2;ORF_type:complete_(+),score=11.10	0	+	3721	4240	0	1	4646	0	No
TRINITY_DN0_c1_g1_i16	.	-	TRINITY_DN13854_c0_g1_i11	0	4646	ID=TRINITY_DN13854_c0_g1_i11.p1;TRINITY_DN13854_c0_g1~~TRINITY_DN13854_c0_g1_i11.p1;ORF_type:complete_(+),score=216.40	0	+	402	3009	0	1	4646	0	No
TRINITY_DN0_c1_g1_i16	.	-	TRINITY_DN13854_c0_g1_i11	0	4646	ID=TRINITY_DN13854_c0_g1_i11.p2;TRINITY_DN13854_c0_g1~~TRINITY_DN13854_c0_g1_i11.p2;ORF_type:complete_(+),score=11.10	0	+	3721	4240	0	1	4646	0	No
TRINITY_DN0_c1_g1_i16	.	+	TRINITY_DN18110_c1_g1_i1	0	923	ID=TRINITY_DN18110_c1_g1_i1.p1;TRINITY_DN18110_c1_g1~~TRINITY_DN18110_c1_g1_i1.p1;ORF_type:5prime_partial_(+),score=29.76	0	+	1	517	0	1	923	0	No
TRINITY_DN0_c1_g1_i16	.	-	TRINITY_DN3177_c0_g1_i60	0	3294	ID=TRINITY_DN3177_c0_g1_i60.p1;TRINITY_DN3177_c0_g1~~TRINITY_DN3177_c0_g1_i60.p1;ORF_type:complete_(+),score=44.56	0	+	1529	2408	0	1	3294	0	No
TRINITY_DN0_c1_g1_i16	.	-	TRINITY_DN3177_c0_g1_i60	0	3294	ID=TRINITY_DN3177_c0_g1_i60.p1;TRINITY_DN3177_c0_g1~~TRINITY_DN3177_c0_g1_i60.p1;ORF_type:complete_(+),score=44.56	0	+	1529	2408	0	1	3294	0	No
TRINITY_DN0_c1_g1_i16	.	-	TRINITY_DN3177_c0_g1_i56	0	3224	ID=TRINITY_DN3177_c0_g1_i56.p1;TRINITY_DN3177_c0_g1~~TRINITY_DN3177_c0_g1_i56.p1;ORF_type:complete_(+),score=44.56	0	+	1459	2338	0	1	3224	0	No
TRINITY_DN0_c1_g1_i16	.	-	TRINITY_DN3177_c0_g1_i56	0	3224	ID=TRINITY_DN3177_c0_g1_i56.p1;TRINITY_DN3177_c0_g1~~TRINITY_DN3177_c0_g1_i56.p1;ORF_type:complete_(+),score=44.56	0	+	1459	2338	0	1	3224	0	No
TRINITY_DN0_c1_g1_i16	.	-	TRINITY_DN3177_c0_g1_i43	0	3502	ID=TRINITY_DN3177_c0_g1_i43.p1;TRINITY_DN3177_c0_g1~~TRINITY_DN3177_c0_g1_i43.p1;ORF_type:complete_(+),score=44.56	0	+	1737	2616	0	1	3502	0	No
TRINITY_DN0_c1_g1_i16	.	-	TRINITY_DN3177_c0_g1_i43	0	3502	ID=TRINITY_DN3177_c0_g1_i43.p1;TRINITY_DN3177_c0_g1~~TRINITY_DN3177_c0_g1_i43.p1;ORF_type:complete_(+),score=44.56	0	+	1737	2616	0	1	3502	0	No
TRINITY_DN0_c1_g1_i16	.	-	TRINITY_DN3177_c0_g1_i30	0	3371	ID=TRINITY_DN3177_c0_g1_i30.p1;TRINITY_DN3177_c0_g1~~TRINITY_DN3177_c0_g1_i30.p1;ORF_type:complete_(+),score=44.56	0	+	1606	2485	0	1	3371	0	No
TRINITY_DN0_c1_g1_i16	.	-	TRINITY_DN3177_c0_g1_i30	0	3371	ID=TRINITY_DN3177_c0_g1_i30.p1;TRINITY_DN3177_c0_g1~~TRINITY_DN3177_c0_g1_i30.p1;ORF_type:complete_(+),score=44.56	0	+	1606	2485	0	1	3371	0	No
TRINITY_DN0_c1_g1_i16	.	-	TRINITY_DN9870_c0_g1_i2	0	2558	ID=TRINITY_DN9870_c0_g1_i2.p1;TRINITY_DN9870_c0_g1~~TRINITY_DN9870_c0_g1_i2.p1;ORF_type:complete_(+),score=40.59	0	+	1747	2287	0	1	2558	0	No
TRINITY_DN0_c1_g1_i16	.	-	TRINITY_DN9870_c0_g1_i2	0	2558	ID=TRINITY_DN9870_c0_g1_i2.p1;TRINITY_DN9870_c0_g1~~TRINITY_DN9870_c0_g1_i2.p1;ORF_type:complete_(+),score=40.59	0	+	1747	2287	0	1	2558	0	No
TRINITY_DN0_c1_g1_i16	.	-	TRINITY_DN824_c0_g2_i2	0	1043	ID=TRINITY_DN824_c0_g2_i2.p1;TRINITY_DN824_c0_g2~~TRINITY_DN824_c0_g2_i2.p1;ORF_type:complete_(-),score=41.59	0	-	245	965	0	1	1043	0	No
TRINITY_DN0_c1_g1_i16	.	-	TRINITY_DN824_c0_g2_i2	0	1043	ID=TRINITY_DN824_c0_g2_i2.p1;TRINITY_DN824_c0_g2~~TRINITY_DN824_c0_g2_i2.p1;ORF_type:complete_(-),score=41.59	0	-	245	965	0	1	1043	0	No
TRINITY_DN0_c1_g1_i16	.	-	TRINITY_DN824_c0_g2_i10	0	1204	ID=TRINITY_DN824_c0_g2_i10.p1;TRINITY_DN824_c0_g2~~TRINITY_DN824_c0_g2_i10.p1;ORF_type:complete_(-),score=41.59	0	-	406	1126	0	1	1204	0	No
TRINITY_DN0_c1_g1_i16	.	-	TRINITY_DN824_c0_g2_i10	0	1204	ID=TRINITY_DN824_c0_g2_i10.p1;TRINITY_DN824_c0_g2~~TRINITY_DN824_c0_g2_i10.p1;ORF_type:complete_(-),score=41.59	0	-	406	1126	0	1	1204	0	No
TRINITY_DN0_c1_g1_i16	.	-	TRINITY_DN12941_c0_g1_i4	0	660	ID=TRINITY_DN12941_c0_g1_i4.p1;TRINITY_DN12941_c0_g1~~TRINITY_DN12941_c0_g1_i4.p1;ORF_type:complete_(+),score=9.14	0	+	170	626	0	1	660	0	No
TRINITY_DN0_c1_g1_i16	.	-	TRINITY_DN12941_c0_g1_i4	0	660	ID=TRINITY_DN12941_c0_g1_i4.p1;TRINITY_DN12941_c0_g1~~TRINITY_DN12941_c0_g1_i4.p1;ORF_type:complete_(+),score=9.14	0	+	170	626	0	1	660	0	No
TRINITY_DN0_c1_g1_i16	.	-	TRINITY_DN93263_c0_g1_i1	0	959	ID=TRINITY_DN93263_c0_g1_i1.p1;TRINITY_DN93263_c0_g1~~TRINITY_DN93263_c0_g1_i1.p1;ORF_type:5prime_partial_(-),score=0.33	0	-	655	958	0	1	959	0	No
TRINITY_DN0_c1_g1_i16	.	-	TRINITY_DN9422_c1_g1_i9	0	1528	ID=TRINITY_DN9422_c1_g1_i9.p1;TRINITY_DN9422_c1_g1~~TRINITY_DN9422_c1_g1_i9.p1;ORF_type:complete_(-),score=58.09	0	-	401	1241	0	1	1528	0	No
TRINITY_DN0_c1_g1_i16	.	+	TRINITY_DN6579_c0_g1_i5	0	1847	ID=TRINITY_DN6579_c0_g1_i5.p1;TRINITY_DN6579_c0_g1~~TRINITY_DN6579_c0_g1_i5.p1;ORF_type:complete_(+),score=64.00	0	+	179	1124	0	1	1847	0	No
TRINITY_DN0_c1_g1_i16	.	+	TRINITY_DN10657_c0_g1_i11	0	2757	ID=TRINITY_DN10657_c0_g1_i11.p1;TRINITY_DN10657_c0_g1~~TRINITY_DN10657_c0_g1_i11.p1;ORF_type:complete_(+),score=2.29	0	+	775	1201	0	1	2757	0	No
TRINITY_DN0_c1_g1_i16	.	+	TRINITY_DN10657_c0_g1_i11	0	2757	ID=TRINITY_DN10657_c0_g1_i11.p1;TRINITY_DN10657_c0_g1~~TRINITY_DN10657_c0_g1_i11.p1;ORF_type:complete_(+),score=2.29	0	+	775	1201	0	1	2757	0	No
TRINITY_DN0_c1_g1_i16	.	-	TRINITY_DN9856_c0_g1_i1	0	299	ID=TRINITY_DN9856_c0_g1_i1.p1;TRINITY_DN9856_c0_g1~~TRINITY_DN9856_c0_g1_i1.p1;ORF_type:internal_(-),score=15.45	0	-	1	298	0	1	299	0	No
TRINITY_DN0_c1_g1_i16	.	-	TRINITY_DN9856_c0_g1_i1	0	299	ID=TRINITY_DN9856_c0_g1_i1.p1;TRINITY_DN9856_c0_g1~~TRINITY_DN9856_c0_g1_i1.p1;ORF_type:internal_(-),score=15.45	0	-	1	298	0	1	299	0	No
TRINITY_DN0_c1_g1_i16	.	+	TRINITY_DN10038_c0_g1_i8	0	1294	ID=TRINITY_DN10038_c0_g1_i8.p1;TRINITY_DN10038_c0_g1~~TRINITY_DN10038_c0_g1_i8.p1;ORF_type:complete_(+),score=7.86	0	+	332	785	0	1	1294	0	No
TRINITY_DN0_c1_g1_i16	.	+	TRINITY_DN10038_c0_g1_i8	0	1294	ID=TRINITY_DN10038_c0_g1_i8.p1;TRINITY_DN10038_c0_g1~~TRINITY_DN10038_c0_g1_i8.p1;ORF_type:complete_(+),score=7.86	0	+	332	785	0	1	1294	0	No
TRINITY_DN0_c1_g1_i16	.	-	TRINITY_DN17109_c0_g1_i1	0	897	ID=TRINITY_DN17109_c0_g1_i1.p1;TRINITY_DN17109_c0_g1~~TRINITY_DN17109_c0_g1_i1.p1;ORF_type:complete_(+),score=16.31	0	+	207	552	0	1	897	0	No
TRINITY_DN0_c1_g1_i16	.	+	TRINITY_DN2720_c0_g1_i59	0	2417	ID=TRINITY_DN2720_c0_g1_i59.p1;TRINITY_DN2720_c0_g1~~TRINITY_DN2720_c0_g1_i59.p1;ORF_type:complete_(+),score=63.29	0	+	279	1908	0	1	2417	0	No
TRINITY_DN0_c1_g1_i16	.	+	TRINITY_DN1365_c0_g1_i1	0	1803	ID=TRINITY_DN1365_c0_g1_i1.p1;TRINITY_DN1365_c0_g1~~TRINITY_DN1365_c0_g1_i1.p1;ORF_type:complete_(-),score=2.59	0	-	1267	1663	0	1	1803	0	No
TRINITY_DN0_c1_g1_i16	.	+	TRINITY_DN5630_c0_g1_i95	0	3638	ID=TRINITY_DN5630_c0_g1_i95.p1;TRINITY_DN5630_c0_g1~~TRINITY_DN5630_c0_g1_i95.p1;ORF_type:complete_(+),score=186.04	0	+	240	2793	0	1	3638	0	No
TRINITY_DN0_c1_g1_i16	.	+	TRINITY_DN5630_c0_g1_i59	0	4168	ID=TRINITY_DN5630_c0_g1_i59.p1;TRINITY_DN5630_c0_g1~~TRINITY_DN5630_c0_g1_i59.p1;ORF_type:complete_(+),score=113.91	0	+	240	1833	0	1	4168	0	No
TRINITY_DN0_c1_g1_i16	.	+	TRINITY_DN5630_c0_g1_i59	0	4168	ID=TRINITY_DN5630_c0_g1_i59.p2;TRINITY_DN5630_c0_g1~~TRINITY_DN5630_c0_g1_i59.p2;ORF_type:complete_(+),score=62.59	0	+	2480	3323	0	1	4168	0	No
TRINITY_DN0_c1_g1_i16	.	+	TRINITY_DN130348_c0_g1_i1	0	332	ID=TRINITY_DN130348_c0_g1_i1.p1;TRINITY_DN130348_c0_g1~~TRINITY_DN130348_c0_g1_i1.p1;ORF_type:internal_(-),score=11.20	0	-	2	332	0	1	332	0	No
TRINITY_DN0_c1_g1_i16	.	+	TRINITY_DN6935_c0_g1_i2	0	1393	ID=TRINITY_DN6935_c0_g1_i2.p1;TRINITY_DN6935_c0_g1~~TRINITY_DN6935_c0_g1_i2.p1;ORF_type:complete_(-),score=20.47	0	-	968	1310	0	1	1393	0	No
TRINITY_DN0_c1_g1_i16	.	+	TRINITY_DN6935_c0_g1_i2	0	1393	ID=TRINITY_DN6935_c0_g1_i2.p1;TRINITY_DN6935_c0_g1~~TRINITY_DN6935_c0_g1_i2.p1;ORF_type:complete_(-),score=20.47	0	-	968	1310	0	1	1393	0	No
TRINITY_DN0_c1_g1_i16	.	+	TRINITY_DN5574_c0_g1_i4	0	2291	ID=TRINITY_DN5574_c0_g1_i4.p1;TRINITY_DN5574_c0_g1~~TRINITY_DN5574_c0_g1_i4.p1;ORF_type:complete_(-),score=23.72	0	-	1086	1638	0	1	2291	0	No
TRINITY_DN0_c1_g1_i16	.	-	TRINITY_DN105_c4_g1_i10	0	1197	ID=TRINITY_DN105_c4_g1_i10.p1;TRINITY_DN105_c4_g1~~TRINITY_DN105_c4_g1_i10.p1;ORF_type:complete_(+),score=37.98	0	+	524	971	0	1	1197	0	No
TRINITY_DN0_c1_g1_i16	.	-	TRINITY_DN105_c4_g1_i10	0	1197	ID=TRINITY_DN105_c4_g1_i10.p2;TRINITY_DN105_c4_g1~~TRINITY_DN105_c4_g1_i10.p2;ORF_type:5prime_partial_(+),score=0.22	0	+	1	328	0	1	1197	0	No
TRINITY_DN0_c1_g1_i16	.	+	TRINITY_DN18177_c0_g2_i1	0	1211	ID=TRINITY_DN18177_c0_g2_i1.p1;TRINITY_DN18177_c0_g2~~TRINITY_DN18177_c0_g2_i1.p1;ORF_type:complete_(+),score=10.47	0	+	408	723	0	1	1211	0	No
TRINITY_DN0_c1_g1_i16	.	+	TRINITY_DN18177_c0_g2_i1	0	1211	ID=TRINITY_DN18177_c0_g2_i1.p1;TRINITY_DN18177_c0_g2~~TRINITY_DN18177_c0_g2_i1.p1;ORF_type:complete_(+),score=10.47	0	+	408	723	0	1	1211	0	No
TRINITY_DN0_c1_g1_i16	.	+	TRINITY_DN13652_c0_g1_i4	0	2014	ID=TRINITY_DN13652_c0_g1_i4.p1;TRINITY_DN13652_c0_g1~~TRINITY_DN13652_c0_g1_i4.p1;ORF_type:complete_(+),score=70.74	0	+	61	1288	0	1	2014	0	No
TRINITY_DN0_c1_g1_i16	.	+	TRINITY_DN13652_c0_g1_i3	0	2164	ID=TRINITY_DN13652_c0_g1_i3.p1;TRINITY_DN13652_c0_g1~~TRINITY_DN13652_c0_g1_i3.p1;ORF_type:complete_(+),score=61.88	0	+	61	1207	0	1	2164	0	No
TRINITY_DN0_c1_g1_i16	.	+	TRINITY_DN13652_c0_g1_i1	0	3196	ID=TRINITY_DN13652_c0_g1_i1.p2;TRINITY_DN13652_c0_g1~~TRINITY_DN13652_c0_g1_i1.p2;ORF_type:complete_(+),score=31.65	0	+	2107	2470	0	1	3196	0	No
TRINITY_DN0_c1_g1_i16	.	+	TRINITY_DN13652_c0_g1_i1	0	3196	ID=TRINITY_DN13652_c0_g1_i1.p1;TRINITY_DN13652_c0_g1~~TRINITY_DN13652_c0_g1_i1.p1;ORF_type:complete_(+),score=26.82	0	+	61	793	0	1	3196	0	No
TRINITY_DN0_c1_g1_i16	.	+	TRINITY_DN707_c0_g1_i3	0	2713	ID=TRINITY_DN707_c0_g1_i3.p2;TRINITY_DN707_c0_g1~~TRINITY_DN707_c0_g1_i3.p2;ORF_type:complete_(-),score=13.69	0	-	1022	1352	0	1	2713	0	No
TRINITY_DN0_c1_g1_i16	.	+	TRINITY_DN707_c0_g1_i3	0	2713	ID=TRINITY_DN707_c0_g1_i3.p1;TRINITY_DN707_c0_g1~~TRINITY_DN707_c0_g1_i3.p1;ORF_type:complete_(-),score=115.33	0	-	1326	2487	0	1	2713	0	No
TRINITY_DN0_c1_g1_i16	.	+	TRINITY_DN707_c0_g1_i2	0	2852	ID=TRINITY_DN707_c0_g1_i2.p2;TRINITY_DN707_c0_g1~~TRINITY_DN707_c0_g1_i2.p2;ORF_type:complete_(-),score=13.69	0	-	1161	1491	0	1	2852	0	No
TRINITY_DN0_c1_g1_i16	.	+	TRINITY_DN707_c0_g1_i2	0	2852	ID=TRINITY_DN707_c0_g1_i2.p1;TRINITY_DN707_c0_g1~~TRINITY_DN707_c0_g1_i2.p1;ORF_type:complete_(-),score=115.33	0	-	1465	2626	0	1	2852	0	No
TRINITY_DN0_c1_g1_i16	.	+	TRINITY_DN707_c0_g1_i1	0	3627	ID=TRINITY_DN707_c0_g1_i1.p2;TRINITY_DN707_c0_g1~~TRINITY_DN707_c0_g1_i1.p2;ORF_type:complete_(-),score=13.69	0	-	1936	2266	0	1	3627	0	No
TRINITY_DN0_c1_g1_i16	.	+	TRINITY_DN707_c0_g1_i1	0	3627	ID=TRINITY_DN707_c0_g1_i1.p1;TRINITY_DN707_c0_g1~~TRINITY_DN707_c0_g1_i1.p1;ORF_type:complete_(-),score=115.33	0	-	2240	3401	0	1	3627	0	No
TRINITY_DN0_c1_g1_i16	.	-	TRINITY_DN16221_c0_g1_i2	0	4121	ID=TRINITY_DN16221_c0_g1_i2.p1;TRINITY_DN16221_c0_g1~~TRINITY_DN16221_c0_g1_i2.p1;ORF_type:complete_(-),score=173.90	0	-	1122	3759	0	1	4121	0	No
TRINITY_DN0_c1_g1_i16	.	+	TRINITY_DN1912_c0_g1_i5	0	1572	ID=TRINITY_DN1912_c0_g1_i5.p2;TRINITY_DN1912_c0_g1~~TRINITY_DN1912_c0_g1_i5.p2;ORF_type:complete_(-),score=22.27	0	-	1040	1343	0	1	1572	0	No
TRINITY_DN0_c1_g1_i16	.	+	TRINITY_DN1912_c0_g1_i5	0	1572	ID=TRINITY_DN1912_c0_g1_i5.p1;TRINITY_DN1912_c0_g1~~TRINITY_DN1912_c0_g1_i5.p1;ORF_type:5prime_partial_(+),score=28.09	0	+	2	422	0	1	1572	0	No
TRINITY_DN0_c1_g1_i16	.	+	TRINITY_DN21007_c0_g1_i7	0	1609	ID=TRINITY_DN21007_c0_g1_i7.p1;TRINITY_DN21007_c0_g1~~TRINITY_DN21007_c0_g1_i7.p1;ORF_type:complete_(+),score=56.86	0	+	160	1381	0	1	1609	0	No
TRINITY_DN0_c1_g1_i16	.	+	TRINITY_DN21007_c0_g1_i6	0	1917	ID=TRINITY_DN21007_c0_g1_i6.p1;TRINITY_DN21007_c0_g1~~TRINITY_DN21007_c0_g1_i6.p1;ORF_type:complete_(+),score=80.00	0	+	135	1689	0	1	1917	0	No
TRINITY_DN0_c1_g1_i16	.	-	TRINITY_DN471_c0_g1_i6	0	1966	ID=TRINITY_DN471_c0_g1_i6.p1;TRINITY_DN471_c0_g1~~TRINITY_DN471_c0_g1_i6.p1;ORF_type:complete_(-),score=38.59	0	-	604	1252	0	1	1966	0	No
TRINITY_DN0_c1_g1_i16	.	-	TRINITY_DN471_c0_g1_i4	0	3557	ID=TRINITY_DN471_c0_g1_i4.p2;TRINITY_DN471_c0_g1~~TRINITY_DN471_c0_g1_i4.p2;ORF_type:complete_(-),score=13.94	0	-	1764	2079	0	1	3557	0	No
TRINITY_DN0_c1_g1_i16	.	+	TRINITY_DN3022_c0_g1_i13	0	3181	ID=TRINITY_DN3022_c0_g1_i13.p2;TRINITY_DN3022_c0_g1~~TRINITY_DN3022_c0_g1_i13.p2;ORF_type:complete_(-),score=30.96	0	-	1293	1860	0	1	3181	0	No
TRINITY_DN0_c1_g1_i16	.	+	TRINITY_DN3022_c0_g1_i13	0	3181	ID=TRINITY_DN3022_c0_g1_i13.p1;TRINITY_DN3022_c0_g1~~TRINITY_DN3022_c0_g1_i13.p1;ORF_type:5prime_partial_(-),score=36.83	0	-	2545	3181	0	1	3181	0	No
TRINITY_DN0_c1_g1_i16	.	+	TRINITY_DN3022_c0_g1_i12	0	2083	ID=TRINITY_DN3022_c0_g1_i12.p1;TRINITY_DN3022_c0_g1~~TRINITY_DN3022_c0_g1_i12.p1;ORF_type:5prime_partial_(-),score=36.83	0	-	1447	2083	0	1	2083	0	No
TRINITY_DN0_c1_g1_i16	.	+	TRINITY_DN3022_c0_g1_i12	0	2083	ID=TRINITY_DN3022_c0_g1_i12.p2;TRINITY_DN3022_c0_g1~~TRINITY_DN3022_c0_g1_i12.p2;ORF_type:complete_(-),score=30.96	0	-	195	762	0	1	2083	0	No
TRINITY_DN0_c1_g1_i16	.	-	TRINITY_DN4636_c0_g1_i2	0	1028	ID=TRINITY_DN4636_c0_g1_i2.p1;TRINITY_DN4636_c0_g1~~TRINITY_DN4636_c0_g1_i2.p1;ORF_type:3prime_partial_(-),score=19.72	0	-	2	314	0	1	1028	0	No
TRINITY_DN0_c1_g1_i16	.	-	TRINITY_DN4636_c0_g1_i2	0	1028	ID=TRINITY_DN4636_c0_g1_i2.p1;TRINITY_DN4636_c0_g1~~TRINITY_DN4636_c0_g1_i2.p1;ORF_type:3prime_partial_(-),score=19.72	0	-	2	314	0	1	1028	0	No
TRINITY_DN0_c1_g1_i16	.	-	TRINITY_DN1639_c0_g1_i7	0	2847	ID=TRINITY_DN1639_c0_g1_i7.p1;TRINITY_DN1639_c0_g1~~TRINITY_DN1639_c0_g1_i7.p1;ORF_type:complete_(-),score=94.09	0	-	537	2625	0	1	2847	0	No
TRINITY_DN0_c1_g1_i16	.	-	TRINITY_DN1639_c0_g1_i23	0	5194	ID=TRINITY_DN1639_c0_g1_i23.p1;TRINITY_DN1639_c0_g1~~TRINITY_DN1639_c0_g1_i23.p1;ORF_type:complete_(-),score=24.10	0	-	4063	4972	0	1	5194	0	No
TRINITY_DN0_c1_g1_i16	.	-	TRINITY_DN1639_c0_g1_i21	0	5008	ID=TRINITY_DN1639_c0_g1_i21.p3;TRINITY_DN1639_c0_g1~~TRINITY_DN1639_c0_g1_i21.p3;ORF_type:complete_(-),score=21.28	0	-	1940	2387	0	1	5008	0	No
TRINITY_DN0_c1_g1_i16	.	-	TRINITY_DN1639_c0_g1_i21	0	5008	ID=TRINITY_DN1639_c0_g1_i21.p1;TRINITY_DN1639_c0_g1~~TRINITY_DN1639_c0_g1_i21.p1;ORF_type:complete_(-),score=24.10	0	-	3877	4786	0	1	5008	0	No
TRINITY_DN0_c1_g1_i16	.	-	TRINITY_DN1639_c0_g1_i21	0	5008	ID=TRINITY_DN1639_c0_g1_i21.p2;TRINITY_DN1639_c0_g1~~TRINITY_DN1639_c0_g1_i21.p2;ORF_type:complete_(-),score=19.94	0	-	537	1077	0	1	5008	0	No
TRINITY_DN0_c1_g1_i16	.	-	TRINITY_DN1639_c0_g1_i20	0	2772	ID=TRINITY_DN1639_c0_g1_i20.p1;TRINITY_DN1639_c0_g1~~TRINITY_DN1639_c0_g1_i20.p1;ORF_type:complete_(-),score=89.79	0	-	537	2550	0	1	2772	0	No
TRINITY_DN0_c1_g1_i16	.	-	TRINITY_DN1639_c0_g1_i19	0	4521	ID=TRINITY_DN1639_c0_g1_i19.p2;TRINITY_DN1639_c0_g1~~TRINITY_DN1639_c0_g1_i19.p2;ORF_type:complete_(-),score=24.10	0	-	3390	4299	0	1	4521	0	No
TRINITY_DN0_c1_g1_i16	.	-	TRINITY_DN1639_c0_g1_i19	0	4521	ID=TRINITY_DN1639_c0_g1_i19.p1;TRINITY_DN1639_c0_g1~~TRINITY_DN1639_c0_g1_i19.p1;ORF_type:complete_(-),score=56.06	0	-	916	1900	0	1	4521	0	No
TRINITY_DN0_c1_g1_i16	.	-	TRINITY_DN1639_c0_g1_i16	0	4703	ID=TRINITY_DN1639_c0_g1_i16.p2;TRINITY_DN1639_c0_g1~~TRINITY_DN1639_c0_g1_i16.p2;ORF_type:complete_(-),score=23.08	0	-	537	1083	0	1	4703	0	No
TRINITY_DN0_c1_g1_i16	.	-	TRINITY_DN1639_c0_g1_i16	0	4703	ID=TRINITY_DN1639_c0_g1_i16.p1;TRINITY_DN1639_c0_g1~~TRINITY_DN1639_c0_g1_i16.p1;ORF_type:complete_(-),score=24.10	0	-	3572	4481	0	1	4703	0	No
TRINITY_DN0_c1_g1_i16	.	+	TRINITY_DN5752_c0_g1_i2	0	1155	ID=TRINITY_DN5752_c0_g1_i2.p1;TRINITY_DN5752_c0_g1~~TRINITY_DN5752_c0_g1_i2.p1;ORF_type:complete_(-),score=25.99	0	-	368	827	0	1	1155	0	No
TRINITY_DN0_c1_g1_i18	.	+	TRINITY_DN0_c1_g1_i13	0	682	ID=TRINITY_DN0_c1_g1_i13.p1;TRINITY_DN0_c1_g1~~TRINITY_DN0_c1_g1_i13.p1;ORF_type:5prime_partial_(+),score=1.27	0	+	2	359	0	1	682	0	No
TRINITY_DN0_c1_g1_i18	.	+	TRINITY_DN0_c1_g1_i13	0	682	ID=TRINITY_DN0_c1_g1_i13.p1;TRINITY_DN0_c1_g1~~TRINITY_DN0_c1_g1_i13.p1;ORF_type:5prime_partial_(+),score=1.27	0	+	2	359	0	1	682	0	No
TRINITY_DN0_c1_g1_i18	.	+	TRINITY_DN0_c1_g1_i13	0	682	ID=TRINITY_DN0_c1_g1_i13.p1;TRINITY_DN0_c1_g1~~TRINITY_DN0_c1_g1_i13.p1;ORF_type:5prime_partial_(+),score=1.27	0	+	2	359	0	1	682	0	No
TRINITY_DN0_c1_g1_i18	.	+	TRINITY_DN4232_c1_g1_i6	0	436	ID=TRINITY_DN4232_c1_g1_i6.p1;TRINITY_DN4232_c1_g1~~TRINITY_DN4232_c1_g1_i6.p1;ORF_type:5prime_partial_(+),score=5.34	0	+	2	302	0	1	436	0	No
TRINITY_DN0_c1_g1_i18	.	+	TRINITY_DN3898_c2_g1_i1	0	2438	ID=TRINITY_DN3898_c2_g1_i1.p3;TRINITY_DN3898_c2_g1~~TRINITY_DN3898_c2_g1_i1.p3;ORF_type:complete_(-),score=22.61	0	-	1832	2195	0	1	2438	0	No
TRINITY_DN0_c1_g1_i18	.	+	TRINITY_DN3898_c2_g1_i1	0	2438	ID=TRINITY_DN3898_c2_g1_i1.p1;TRINITY_DN3898_c2_g1~~TRINITY_DN3898_c2_g1_i1.p1;ORF_type:5prime_partial_(+),score=28.75	0	+	1	676	0	1	2438	0	No
TRINITY_DN0_c1_g1_i18	.	+	TRINITY_DN3898_c2_g1_i1	0	2438	ID=TRINITY_DN3898_c2_g1_i1.p2;TRINITY_DN3898_c2_g1~~TRINITY_DN3898_c2_g1_i1.p2;ORF_type:complete_(+),score=28.03	0	+	927	1440	0	1	2438	0	No
TRINITY_DN0_c1_g1_i18	.	+	TRINITY_DN6000_c0_g1_i26	0	2521	ID=TRINITY_DN6000_c0_g1_i26.p1;TRINITY_DN6000_c0_g1~~TRINITY_DN6000_c0_g1_i26.p1;ORF_type:complete_(-),score=65.57	0	-	429	1629	0	1	2521	0	No
TRINITY_DN0_c1_g1_i18	.	+	TRINITY_DN6000_c0_g1_i23	0	2775	ID=TRINITY_DN6000_c0_g1_i23.p1;TRINITY_DN6000_c0_g1~~TRINITY_DN6000_c0_g1_i23.p1;ORF_type:complete_(-),score=49.26	0	-	429	1158	0	1	2775	0	No
TRINITY_DN0_c1_g1_i18	.	-	TRINITY_DN6246_c0_g2_i1	0	507	ID=TRINITY_DN6246_c0_g2_i1.p1;TRINITY_DN6246_c0_g2~~TRINITY_DN6246_c0_g2_i1.p1;ORF_type:complete_(+),score=0.78	0	+	123	471	0	1	507	0	No
TRINITY_DN0_c1_g1_i18	.	-	TRINITY_DN824_c0_g2_i2	0	1043	ID=TRINITY_DN824_c0_g2_i2.p1;TRINITY_DN824_c0_g2~~TRINITY_DN824_c0_g2_i2.p1;ORF_type:complete_(-),score=41.59	0	-	245	965	0	1	1043	0	No
TRINITY_DN0_c1_g1_i18	.	+	TRINITY_DN824_c0_g2_i2	0	1043	ID=TRINITY_DN824_c0_g2_i2.p1;TRINITY_DN824_c0_g2~~TRINITY_DN824_c0_g2_i2.p1;ORF_type:complete_(-),score=41.59	0	-	245	965	0	1	1043	0	No
TRINITY_DN0_c1_g1_i18	.	-	TRINITY_DN824_c0_g2_i10	0	1204	ID=TRINITY_DN824_c0_g2_i10.p1;TRINITY_DN824_c0_g2~~TRINITY_DN824_c0_g2_i10.p1;ORF_type:complete_(-),score=41.59	0	-	406	1126	0	1	1204	0	No
TRINITY_DN0_c1_g1_i18	.	+	TRINITY_DN824_c0_g2_i10	0	1204	ID=TRINITY_DN824_c0_g2_i10.p1;TRINITY_DN824_c0_g2~~TRINITY_DN824_c0_g2_i10.p1;ORF_type:complete_(-),score=41.59	0	-	406	1126	0	1	1204	0	No
TRINITY_DN0_c1_g1_i18	.	-	TRINITY_DN3177_c0_g1_i60	0	3294	ID=TRINITY_DN3177_c0_g1_i60.p1;TRINITY_DN3177_c0_g1~~TRINITY_DN3177_c0_g1_i60.p1;ORF_type:complete_(+),score=44.56	0	+	1529	2408	0	1	3294	0	No
TRINITY_DN0_c1_g1_i18	.	-	TRINITY_DN3177_c0_g1_i56	0	3224	ID=TRINITY_DN3177_c0_g1_i56.p1;TRINITY_DN3177_c0_g1~~TRINITY_DN3177_c0_g1_i56.p1;ORF_type:complete_(+),score=44.56	0	+	1459	2338	0	1	3224	0	No
TRINITY_DN0_c1_g1_i18	.	-	TRINITY_DN3177_c0_g1_i43	0	3502	ID=TRINITY_DN3177_c0_g1_i43.p1;TRINITY_DN3177_c0_g1~~TRINITY_DN3177_c0_g1_i43.p1;ORF_type:complete_(+),score=44.56	0	+	1737	2616	0	1	3502	0	No
TRINITY_DN0_c1_g1_i18	.	-	TRINITY_DN3177_c0_g1_i30	0	3371	ID=TRINITY_DN3177_c0_g1_i30.p1;TRINITY_DN3177_c0_g1~~TRINITY_DN3177_c0_g1_i30.p1;ORF_type:complete_(+),score=44.56	0	+	1606	2485	0	1	3371	0	No
TRINITY_DN0_c1_g1_i18	.	-	TRINITY_DN12941_c0_g1_i4	0	660	ID=TRINITY_DN12941_c0_g1_i4.p1;TRINITY_DN12941_c0_g1~~TRINITY_DN12941_c0_g1_i4.p1;ORF_type:complete_(+),score=9.14	0	+	170	626	0	1	660	0	No
TRINITY_DN0_c1_g1_i18	.	-	TRINITY_DN13854_c0_g1_i2	0	4805	ID=TRINITY_DN13854_c0_g1_i2.p1;TRINITY_DN13854_c0_g1~~TRINITY_DN13854_c0_g1_i2.p1;ORF_type:complete_(+),score=226.97	0	+	402	3168	0	1	4805	0	No
TRINITY_DN0_c1_g1_i18	.	-	TRINITY_DN13854_c0_g1_i2	0	4805	ID=TRINITY_DN13854_c0_g1_i2.p2;TRINITY_DN13854_c0_g1~~TRINITY_DN13854_c0_g1_i2.p2;ORF_type:complete_(+),score=11.10	0	+	3880	4399	0	1	4805	0	No
TRINITY_DN0_c1_g1_i18	.	-	TRINITY_DN13854_c0_g1_i11	0	4646	ID=TRINITY_DN13854_c0_g1_i11.p1;TRINITY_DN13854_c0_g1~~TRINITY_DN13854_c0_g1_i11.p1;ORF_type:complete_(+),score=216.40	0	+	402	3009	0	1	4646	0	No
TRINITY_DN0_c1_g1_i18	.	-	TRINITY_DN13854_c0_g1_i11	0	4646	ID=TRINITY_DN13854_c0_g1_i11.p2;TRINITY_DN13854_c0_g1~~TRINITY_DN13854_c0_g1_i11.p2;ORF_type:complete_(+),score=11.10	0	+	3721	4240	0	1	4646	0	No
TRINITY_DN0_c1_g1_i18	.	-	TRINITY_DN9870_c0_g1_i2	0	2558	ID=TRINITY_DN9870_c0_g1_i2.p1;TRINITY_DN9870_c0_g1~~TRINITY_DN9870_c0_g1_i2.p1;ORF_type:complete_(+),score=40.59	0	+	1747	2287	0	1	2558	0	No
TRINITY_DN0_c1_g1_i18	.	+	TRINITY_DN18110_c1_g1_i1	0	923	ID=TRINITY_DN18110_c1_g1_i1.p1;TRINITY_DN18110_c1_g1~~TRINITY_DN18110_c1_g1_i1.p1;ORF_type:5prime_partial_(+),score=29.76	0	+	1	517	0	1	923	0	No
TRINITY_DN0_c1_g1_i18	.	-	TRINITY_DN93263_c0_g1_i1	0	959	ID=TRINITY_DN93263_c0_g1_i1.p1;TRINITY_DN93263_c0_g1~~TRINITY_DN93263_c0_g1_i1.p1;ORF_type:5prime_partial_(-),score=0.33	0	-	655	958	0	1	959	0	No
TRINITY_DN0_c1_g1_i18	.	+	TRINITY_DN6935_c0_g1_i2	0	1393	ID=TRINITY_DN6935_c0_g1_i2.p1;TRINITY_DN6935_c0_g1~~TRINITY_DN6935_c0_g1_i2.p1;ORF_type:complete_(-),score=20.47	0	-	968	1310	0	1	1393	0	No
TRINITY_DN0_c1_g1_i18	.	+	TRINITY_DN2720_c0_g1_i59	0	2417	ID=TRINITY_DN2720_c0_g1_i59.p1;TRINITY_DN2720_c0_g1~~TRINITY_DN2720_c0_g1_i59.p1;ORF_type:complete_(+),score=63.29	0	+	279	1908	0	1	2417	0	No
TRINITY_DN0_c1_g1_i18	.	+	TRINITY_DN21438_c0_g1_i1	0	691	ID=TRINITY_DN21438_c0_g1_i1.p1;TRINITY_DN21438_c0_g1~~TRINITY_DN21438_c0_g1_i1.p1;ORF_type:3prime_partial_(-),score=24.50	0	-	0	372	0	1	691	0	No
TRINITY_DN0_c1_g1_i18	.	+	TRINITY_DN18177_c0_g2_i1	0	1211	ID=TRINITY_DN18177_c0_g2_i1.p1;TRINITY_DN18177_c0_g2~~TRINITY_DN18177_c0_g2_i1.p1;ORF_type:complete_(+),score=10.47	0	+	408	723	0	1	1211	0	No
TRINITY_DN0_c1_g1_i18	.	+	TRINITY_DN1365_c0_g1_i1	0	1803	ID=TRINITY_DN1365_c0_g1_i1.p1;TRINITY_DN1365_c0_g1~~TRINITY_DN1365_c0_g1_i1.p1;ORF_type:complete_(-),score=2.59	0	-	1267	1663	0	1	1803	0	No
TRINITY_DN0_c1_g1_i18	.	+	TRINITY_DN6579_c0_g1_i5	0	1847	ID=TRINITY_DN6579_c0_g1_i5.p1;TRINITY_DN6579_c0_g1~~TRINITY_DN6579_c0_g1_i5.p1;ORF_type:complete_(+),score=64.00	0	+	179	1124	0	1	1847	0	No
TRINITY_DN0_c1_g1_i18	.	+	TRINITY_DN10038_c0_g1_i8	0	1294	ID=TRINITY_DN10038_c0_g1_i8.p1;TRINITY_DN10038_c0_g1~~TRINITY_DN10038_c0_g1_i8.p1;ORF_type:complete_(+),score=7.86	0	+	332	785	0	1	1294	0	No
TRINITY_DN0_c1_g1_i18	.	+	TRINITY_DN10657_c0_g1_i11	0	2757	ID=TRINITY_DN10657_c0_g1_i11.p1;TRINITY_DN10657_c0_g1~~TRINITY_DN10657_c0_g1_i11.p1;ORF_type:complete_(+),score=2.29	0	+	775	1201	0	1	2757	0	No
TRINITY_DN0_c1_g1_i18	.	-	TRINITY_DN9856_c0_g1_i1	0	299	ID=TRINITY_DN9856_c0_g1_i1.p1;TRINITY_DN9856_c0_g1~~TRINITY_DN9856_c0_g1_i1.p1;ORF_type:internal_(-),score=15.45	0	-	1	298	0	1	299	0	No
TRINITY_DN0_c1_g1_i18	.	+	TRINITY_DN5630_c0_g1_i95	0	3638	ID=TRINITY_DN5630_c0_g1_i95.p1;TRINITY_DN5630_c0_g1~~TRINITY_DN5630_c0_g1_i95.p1;ORF_type:complete_(+),score=186.04	0	+	240	2793	0	1	3638	0	No
TRINITY_DN0_c1_g1_i18	.	+	TRINITY_DN5630_c0_g1_i59	0	4168	ID=TRINITY_DN5630_c0_g1_i59.p1;TRINITY_DN5630_c0_g1~~TRINITY_DN5630_c0_g1_i59.p1;ORF_type:complete_(+),score=113.91	0	+	240	1833	0	1	4168	0	No
TRINITY_DN0_c1_g1_i18	.	+	TRINITY_DN5630_c0_g1_i59	0	4168	ID=TRINITY_DN5630_c0_g1_i59.p2;TRINITY_DN5630_c0_g1~~TRINITY_DN5630_c0_g1_i59.p2;ORF_type:complete_(+),score=62.59	0	+	2480	3323	0	1	4168	0	No
TRINITY_DN0_c1_g1_i18	.	+	TRINITY_DN130348_c0_g1_i1	0	332	ID=TRINITY_DN130348_c0_g1_i1.p1;TRINITY_DN130348_c0_g1~~TRINITY_DN130348_c0_g1_i1.p1;ORF_type:internal_(-),score=11.20	0	-	2	332	0	1	332	0	No
TRINITY_DN0_c1_g1_i18	.	-	TRINITY_DN17109_c0_g1_i1	0	897	ID=TRINITY_DN17109_c0_g1_i1.p1;TRINITY_DN17109_c0_g1~~TRINITY_DN17109_c0_g1_i1.p1;ORF_type:complete_(+),score=16.31	0	+	207	552	0	1	897	0	No
TRINITY_DN0_c1_g1_i18	.	+	TRINITY_DN13652_c0_g1_i4	0	2014	ID=TRINITY_DN13652_c0_g1_i4.p1;TRINITY_DN13652_c0_g1~~TRINITY_DN13652_c0_g1_i4.p1;ORF_type:complete_(+),score=70.74	0	+	61	1288	0	1	2014	0	No
TRINITY_DN0_c1_g1_i18	.	+	TRINITY_DN13652_c0_g1_i3	0	2164	ID=TRINITY_DN13652_c0_g1_i3.p1;TRINITY_DN13652_c0_g1~~TRINITY_DN13652_c0_g1_i3.p1;ORF_type:complete_(+),score=61.88	0	+	61	1207	0	1	2164	0	No
TRINITY_DN0_c1_g1_i18	.	+	TRINITY_DN13652_c0_g1_i1	0	3196	ID=TRINITY_DN13652_c0_g1_i1.p2;TRINITY_DN13652_c0_g1~~TRINITY_DN13652_c0_g1_i1.p2;ORF_type:complete_(+),score=31.65	0	+	2107	2470	0	1	3196	0	No
TRINITY_DN0_c1_g1_i18	.	+	TRINITY_DN13652_c0_g1_i1	0	3196	ID=TRINITY_DN13652_c0_g1_i1.p1;TRINITY_DN13652_c0_g1~~TRINITY_DN13652_c0_g1_i1.p1;ORF_type:complete_(+),score=26.82	0	+	61	793	0	1	3196	0	No
TRINITY_DN0_c1_g1_i18	.	+	TRINITY_DN5574_c0_g1_i4	0	2291	ID=TRINITY_DN5574_c0_g1_i4.p1;TRINITY_DN5574_c0_g1~~TRINITY_DN5574_c0_g1_i4.p1;ORF_type:complete_(-),score=23.72	0	-	1086	1638	0	1	2291	0	No
TRINITY_DN0_c1_g1_i18	.	-	TRINITY_DN16221_c0_g1_i2	0	4121	ID=TRINITY_DN16221_c0_g1_i2.p1;TRINITY_DN16221_c0_g1~~TRINITY_DN16221_c0_g1_i2.p1;ORF_type:complete_(-),score=173.90	0	-	1122	3759	0	1	4121	0	No
TRINITY_DN0_c1_g1_i18	.	-	TRINITY_DN4636_c0_g1_i2	0	1028	ID=TRINITY_DN4636_c0_g1_i2.p1;TRINITY_DN4636_c0_g1~~TRINITY_DN4636_c0_g1_i2.p1;ORF_type:3prime_partial_(-),score=19.72	0	-	2	314	0	1	1028	0	No
TRINITY_DN0_c1_g1_i19	.	+	TRINITY_DN0_c1_g1_i13	0	682	ID=TRINITY_DN0_c1_g1_i13.p1;TRINITY_DN0_c1_g1~~TRINITY_DN0_c1_g1_i13.p1;ORF_type:5prime_partial_(+),score=1.27	0	+	2	359	0	1	682	0	No
TRINITY_DN0_c1_g1_i19	.	+	TRINITY_DN0_c1_g1_i13	0	682	ID=TRINITY_DN0_c1_g1_i13.p1;TRINITY_DN0_c1_g1~~TRINITY_DN0_c1_g1_i13.p1;ORF_type:5prime_partial_(+),score=1.27	0	+	2	359	0	1	682	0	No
TRINITY_DN0_c1_g1_i19	.	+	TRINITY_DN0_c1_g1_i13	0	682	ID=TRINITY_DN0_c1_g1_i13.p1;TRINITY_DN0_c1_g1~~TRINITY_DN0_c1_g1_i13.p1;ORF_type:5prime_partial_(+),score=1.27	0	+	2	359	0	1	682	0	No
TRINITY_DN0_c1_g1_i19	.	+	TRINITY_DN0_c1_g1_i13	0	682	ID=TRINITY_DN0_c1_g1_i13.p1;TRINITY_DN0_c1_g1~~TRINITY_DN0_c1_g1_i13.p1;ORF_type:5prime_partial_(+),score=1.27	0	+	2	359	0	1	682	0	No
TRINITY_DN0_c1_g1_i19	.	+	TRINITY_DN4232_c1_g1_i6	0	436	ID=TRINITY_DN4232_c1_g1_i6.p1;TRINITY_DN4232_c1_g1~~TRINITY_DN4232_c1_g1_i6.p1;ORF_type:5prime_partial_(+),score=5.34	0	+	2	302	0	1	436	0	No
TRINITY_DN0_c1_g1_i19	.	+	TRINITY_DN4232_c1_g1_i6	0	436	ID=TRINITY_DN4232_c1_g1_i6.p1;TRINITY_DN4232_c1_g1~~TRINITY_DN4232_c1_g1_i6.p1;ORF_type:5prime_partial_(+),score=5.34	0	+	2	302	0	1	436	0	No
TRINITY_DN0_c1_g1_i19	.	-	TRINITY_DN6246_c0_g2_i1	0	507	ID=TRINITY_DN6246_c0_g2_i1.p1;TRINITY_DN6246_c0_g2~~TRINITY_DN6246_c0_g2_i1.p1;ORF_type:complete_(+),score=0.78	0	+	123	471	0	1	507	0	No
TRINITY_DN0_c1_g1_i19	.	-	TRINITY_DN6246_c0_g2_i1	0	507	ID=TRINITY_DN6246_c0_g2_i1.p1;TRINITY_DN6246_c0_g2~~TRINITY_DN6246_c0_g2_i1.p1;ORF_type:complete_(+),score=0.78	0	+	123	471	0	1	507	0	No
TRINITY_DN0_c1_g1_i19	.	+	TRINITY_DN6000_c0_g1_i26	0	2521	ID=TRINITY_DN6000_c0_g1_i26.p1;TRINITY_DN6000_c0_g1~~TRINITY_DN6000_c0_g1_i26.p1;ORF_type:complete_(-),score=65.57	0	-	429	1629	0	1	2521	0	No
TRINITY_DN0_c1_g1_i19	.	+	TRINITY_DN6000_c0_g1_i26	0	2521	ID=TRINITY_DN6000_c0_g1_i26.p1;TRINITY_DN6000_c0_g1~~TRINITY_DN6000_c0_g1_i26.p1;ORF_type:complete_(-),score=65.57	0	-	429	1629	0	1	2521	0	No
TRINITY_DN0_c1_g1_i19	.	+	TRINITY_DN6000_c0_g1_i23	0	2775	ID=TRINITY_DN6000_c0_g1_i23.p1;TRINITY_DN6000_c0_g1~~TRINITY_DN6000_c0_g1_i23.p1;ORF_type:complete_(-),score=49.26	0	-	429	1158	0	1	2775	0	No
TRINITY_DN0_c1_g1_i19	.	+	TRINITY_DN6000_c0_g1_i23	0	2775	ID=TRINITY_DN6000_c0_g1_i23.p1;TRINITY_DN6000_c0_g1~~TRINITY_DN6000_c0_g1_i23.p1;ORF_type:complete_(-),score=49.26	0	-	429	1158	0	1	2775	0	No
TRINITY_DN0_c1_g1_i19	.	+	TRINITY_DN3898_c2_g1_i1	0	2438	ID=TRINITY_DN3898_c2_g1_i1.p3;TRINITY_DN3898_c2_g1~~TRINITY_DN3898_c2_g1_i1.p3;ORF_type:complete_(-),score=22.61	0	-	1832	2195	0	1	2438	0	No
TRINITY_DN0_c1_g1_i19	.	+	TRINITY_DN3898_c2_g1_i1	0	2438	ID=TRINITY_DN3898_c2_g1_i1.p1;TRINITY_DN3898_c2_g1~~TRINITY_DN3898_c2_g1_i1.p1;ORF_type:5prime_partial_(+),score=28.75	0	+	1	676	0	1	2438	0	No
TRINITY_DN0_c1_g1_i19	.	+	TRINITY_DN3898_c2_g1_i1	0	2438	ID=TRINITY_DN3898_c2_g1_i1.p2;TRINITY_DN3898_c2_g1~~TRINITY_DN3898_c2_g1_i1.p2;ORF_type:complete_(+),score=28.03	0	+	927	1440	0	1	2438	0	No
TRINITY_DN0_c1_g1_i19	.	+	TRINITY_DN3898_c2_g1_i1	0	2438	ID=TRINITY_DN3898_c2_g1_i1.p3;TRINITY_DN3898_c2_g1~~TRINITY_DN3898_c2_g1_i1.p3;ORF_type:complete_(-),score=22.61	0	-	1832	2195	0	1	2438	0	No
TRINITY_DN0_c1_g1_i19	.	+	TRINITY_DN3898_c2_g1_i1	0	2438	ID=TRINITY_DN3898_c2_g1_i1.p1;TRINITY_DN3898_c2_g1~~TRINITY_DN3898_c2_g1_i1.p1;ORF_type:5prime_partial_(+),score=28.75	0	+	1	676	0	1	2438	0	No
TRINITY_DN0_c1_g1_i19	.	+	TRINITY_DN3898_c2_g1_i1	0	2438	ID=TRINITY_DN3898_c2_g1_i1.p2;TRINITY_DN3898_c2_g1~~TRINITY_DN3898_c2_g1_i1.p2;ORF_type:complete_(+),score=28.03	0	+	927	1440	0	1	2438	0	No
TRINITY_DN0_c1_g1_i19	.	-	TRINITY_DN13854_c0_g1_i2	0	4805	ID=TRINITY_DN13854_c0_g1_i2.p1;TRINITY_DN13854_c0_g1~~TRINITY_DN13854_c0_g1_i2.p1;ORF_type:complete_(+),score=226.97	0	+	402	3168	0	1	4805	0	No
TRINITY_DN0_c1_g1_i19	.	-	TRINITY_DN13854_c0_g1_i2	0	4805	ID=TRINITY_DN13854_c0_g1_i2.p2;TRINITY_DN13854_c0_g1~~TRINITY_DN13854_c0_g1_i2.p2;ORF_type:complete_(+),score=11.10	0	+	3880	4399	0	1	4805	0	No
[truncated: 235,844+ more rows]

## Sheet: Table S3
Query	Length_Query	Target	Length_Target	dG	ndG	Start_Position_Query	End_Position_Query	Start_Position_Target	End_Position_Target
[truncated: 184 more rows]
